# Supplementary material for: The immunopeptidomic landscape of ovarian carcinomas
Source: PubMed Central journal article supplement — Proc Natl Acad Sci U S A. 2017 Nov 1;114(46):E9942–51. doi: 10.1073/pnas.1707658114 (PMC5699044; doi:10.1073/pnas.1707658114), 2017-11-01

Class I

# MUC16

Median RPKM of highest tissue: 1.438

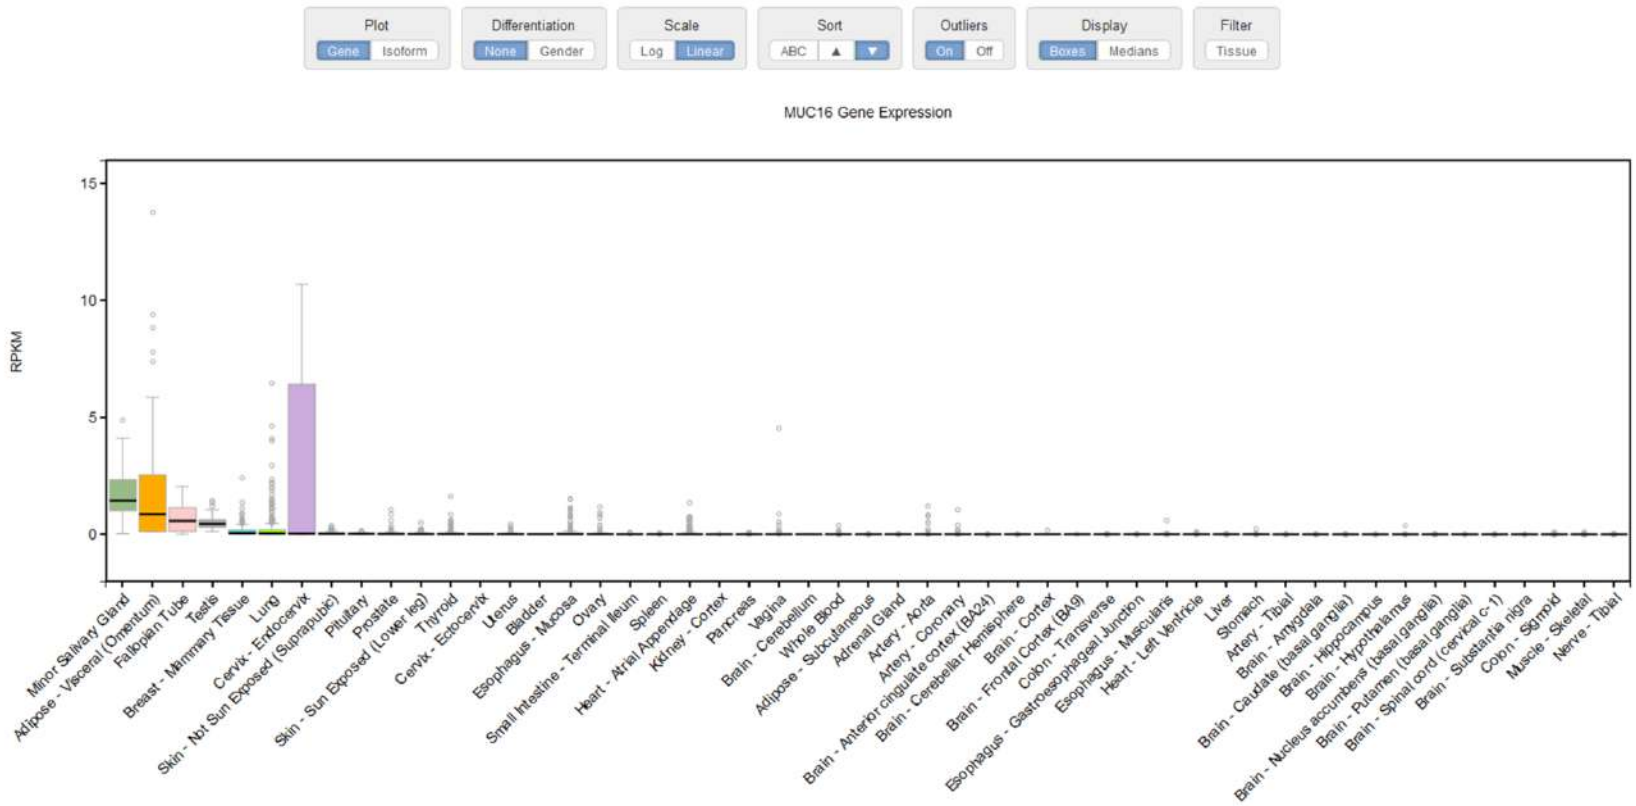

# PTTG1

Median RPKM of highest tissue: 78.507

Esophagus-Mucosa 17.038

Vagina: 6.777

Lung: 2.533

Plot:      Differentiation:      Scale:      Sort:       Outliers:      Display:      Filter:

PTTG1 Gene Expression

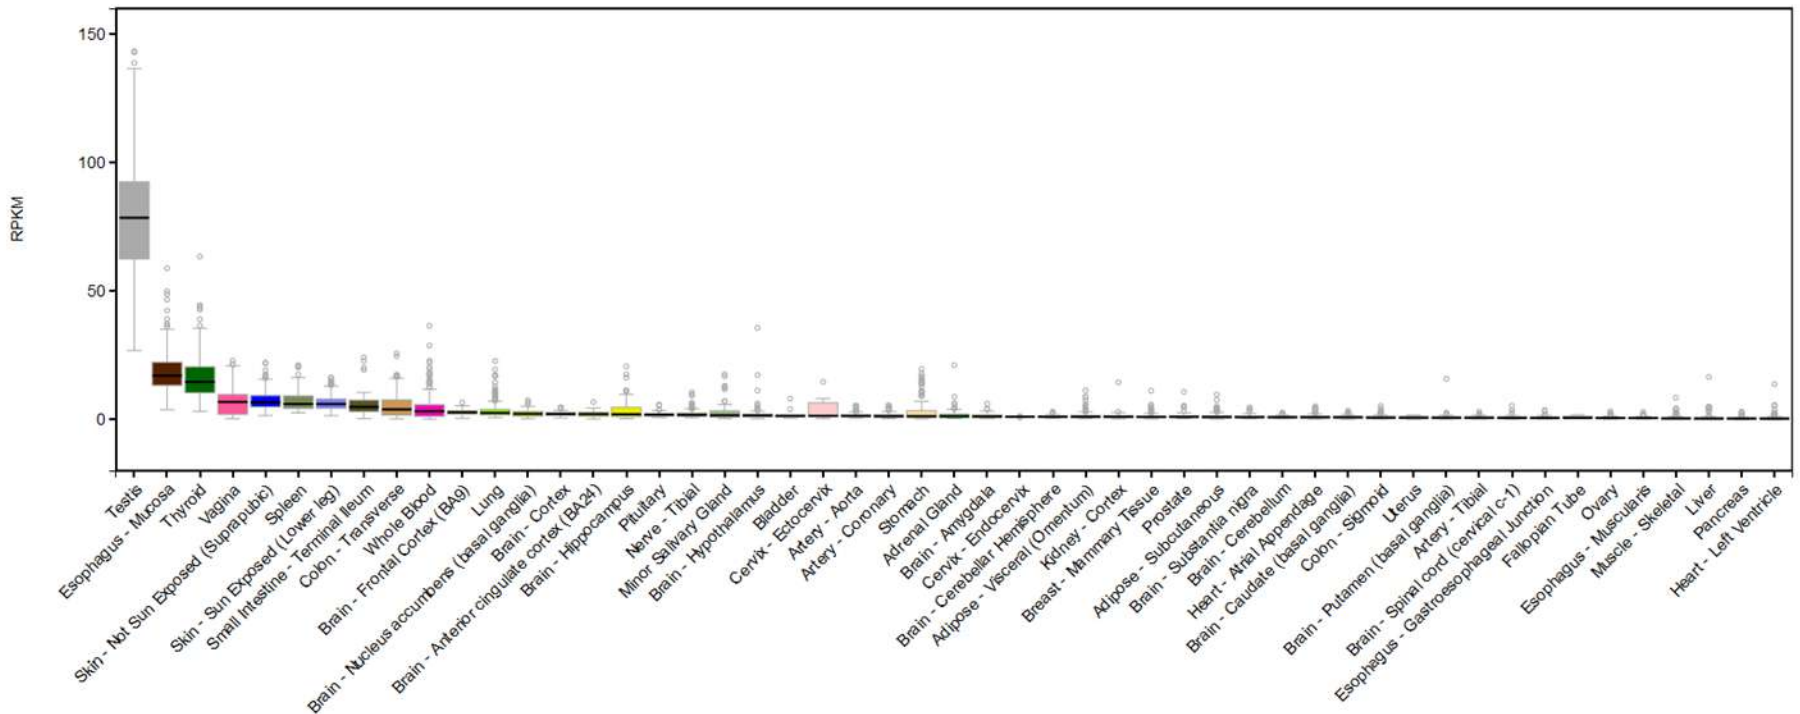

# CRABP2

Median RPKM of highest tissue: 481.024

Bladder: 24.560

Plot:  Gene  Isoform

Differentiation:  None  Gender

Scale:  Log  Linear

Sort: ABC ▲ ▼

Outliers:  On  Off

Display:  Boxes  Medians

Filter:

CRABP2 Gene Expression

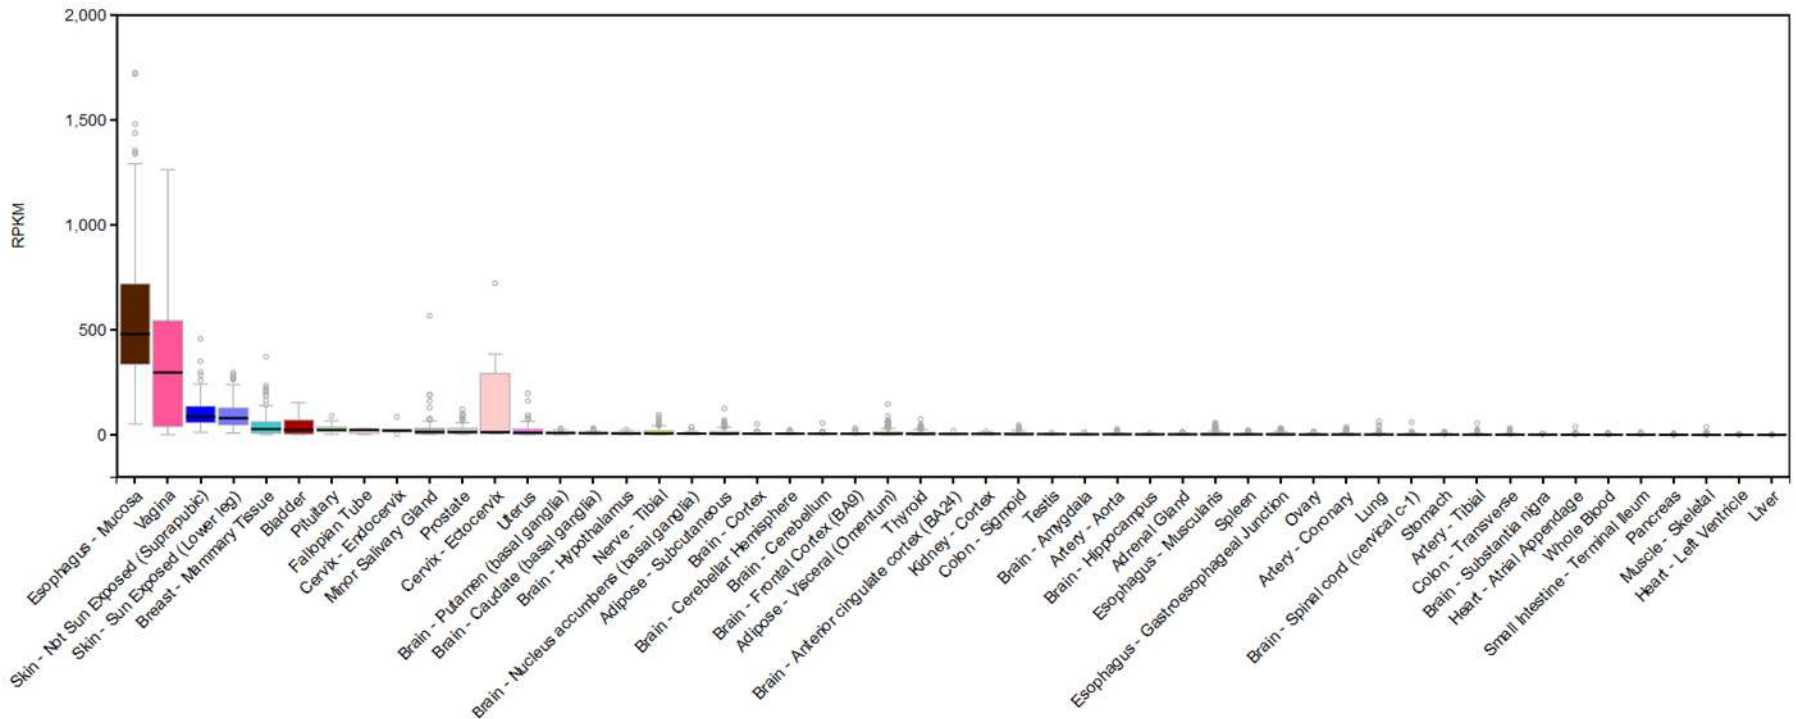



# IDO1

Median RPKM of highest tissue: 5.979

Plot:  Gene  Isoform

Differentiation:  None  Gender

Scale:  Log  Linear

Sort: ABC  ▲  ▼

Outliers:  On  Off

Display:  Boxes  Medians

Filter:

IDO1 Gene Expression

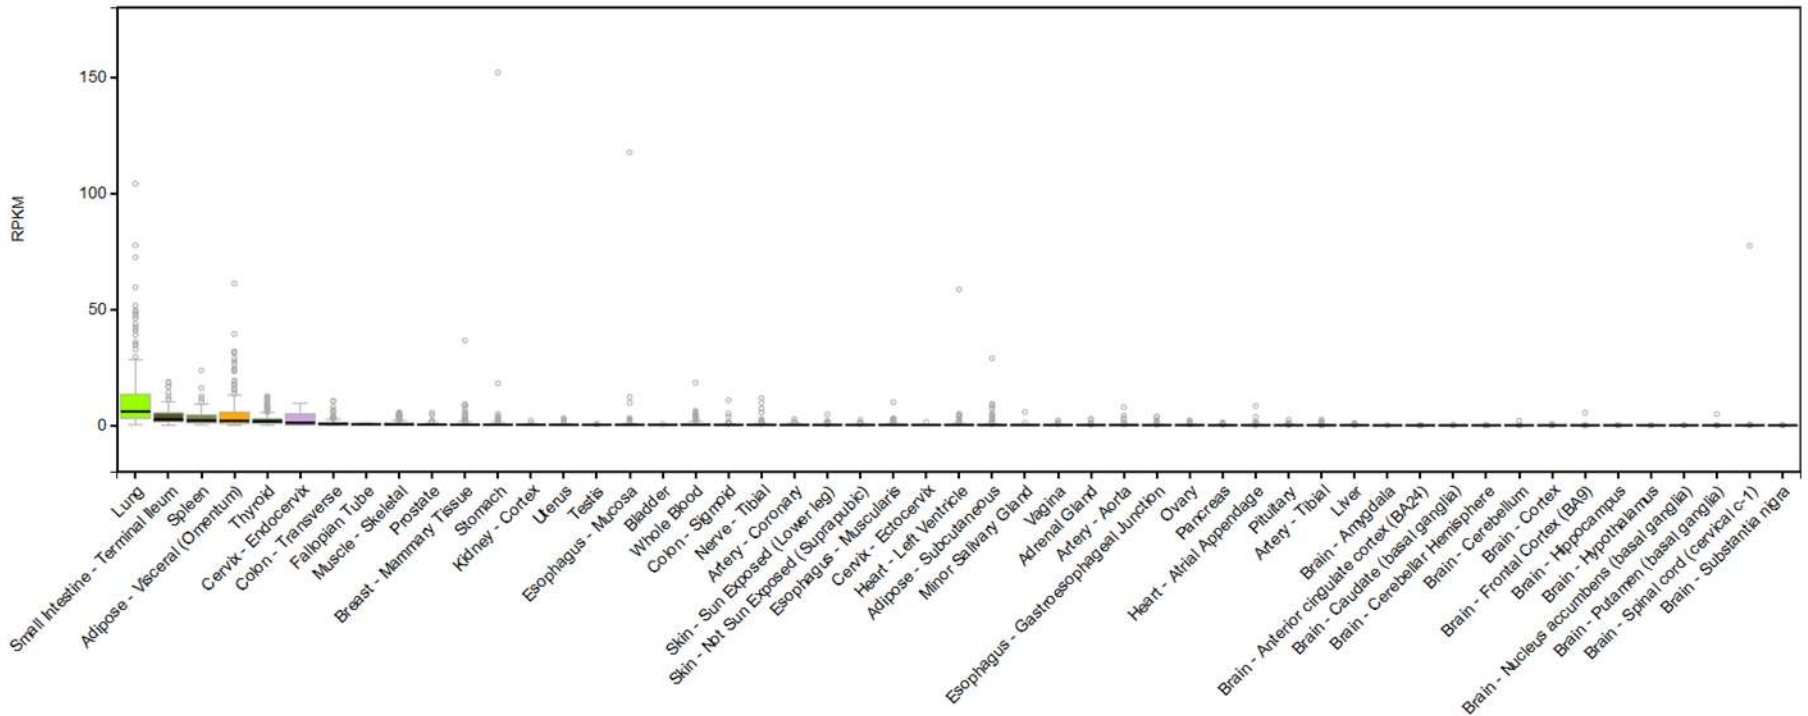



# MMP11

Median RPKM of highest tissue: 13.740

Plot:  Gene  Isoform

Differentiation:  None  Gender

Scale:  Log  Linear

Sort: ABC  ▲  ▼

Outliers:  On  Off

Display:  Boxes  Medians

Filter:  Tissue

MMP11 Gene Expression

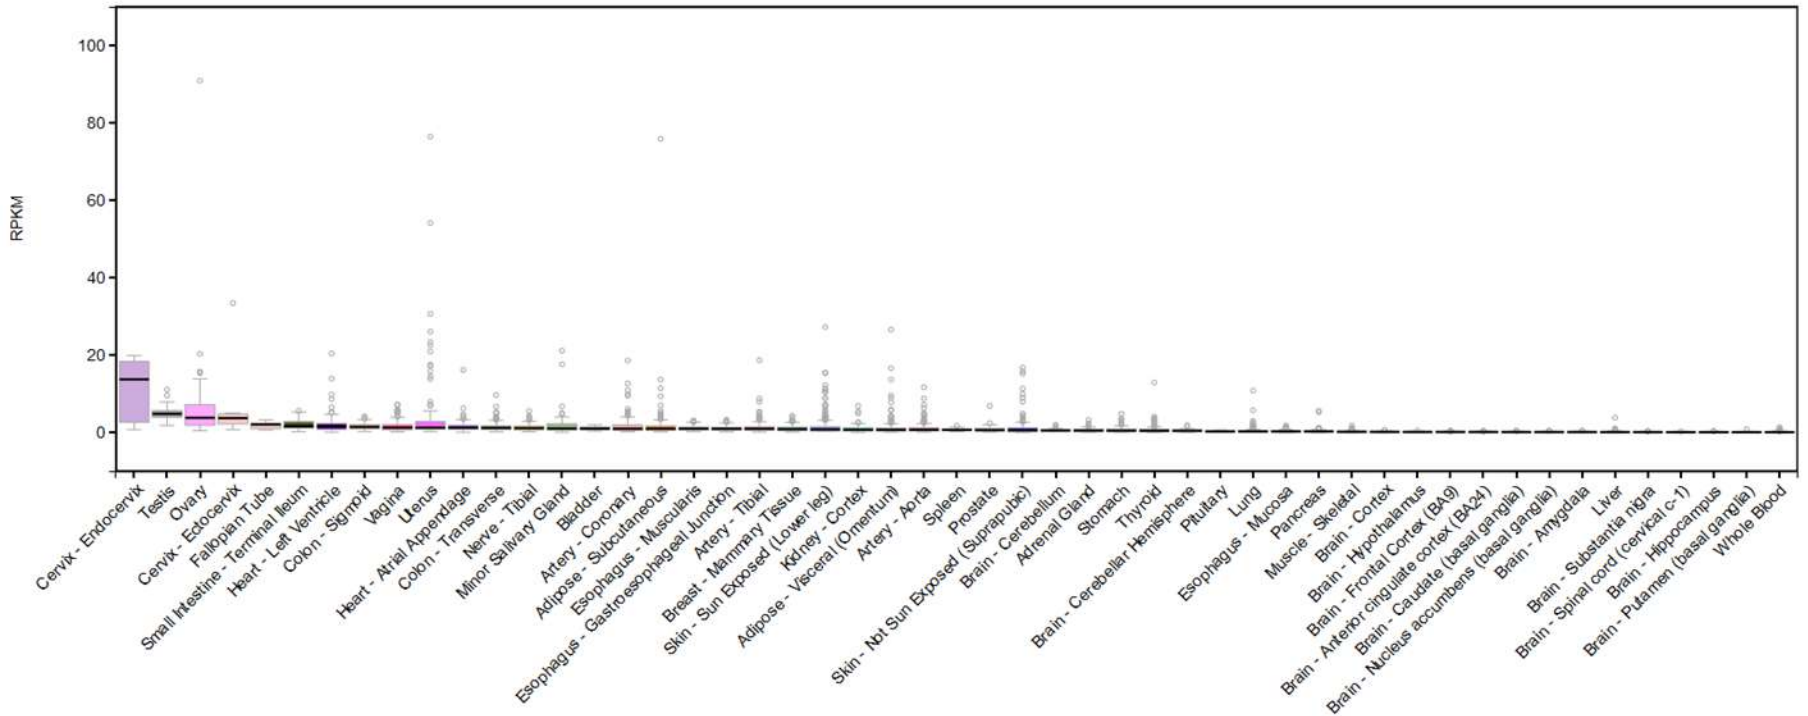

# TMEM158

Median RPKM of highest tissue: 53.478

Plot:  Gene  Isoform  
Differentiation:  None  Gender  
Scale:  Log  Linear  
Sort: ABC  ▲  ▼  
Outliers:  On  Off  
Display:  Boxes  Medians  
Filter:

TMEM158 Gene Expression

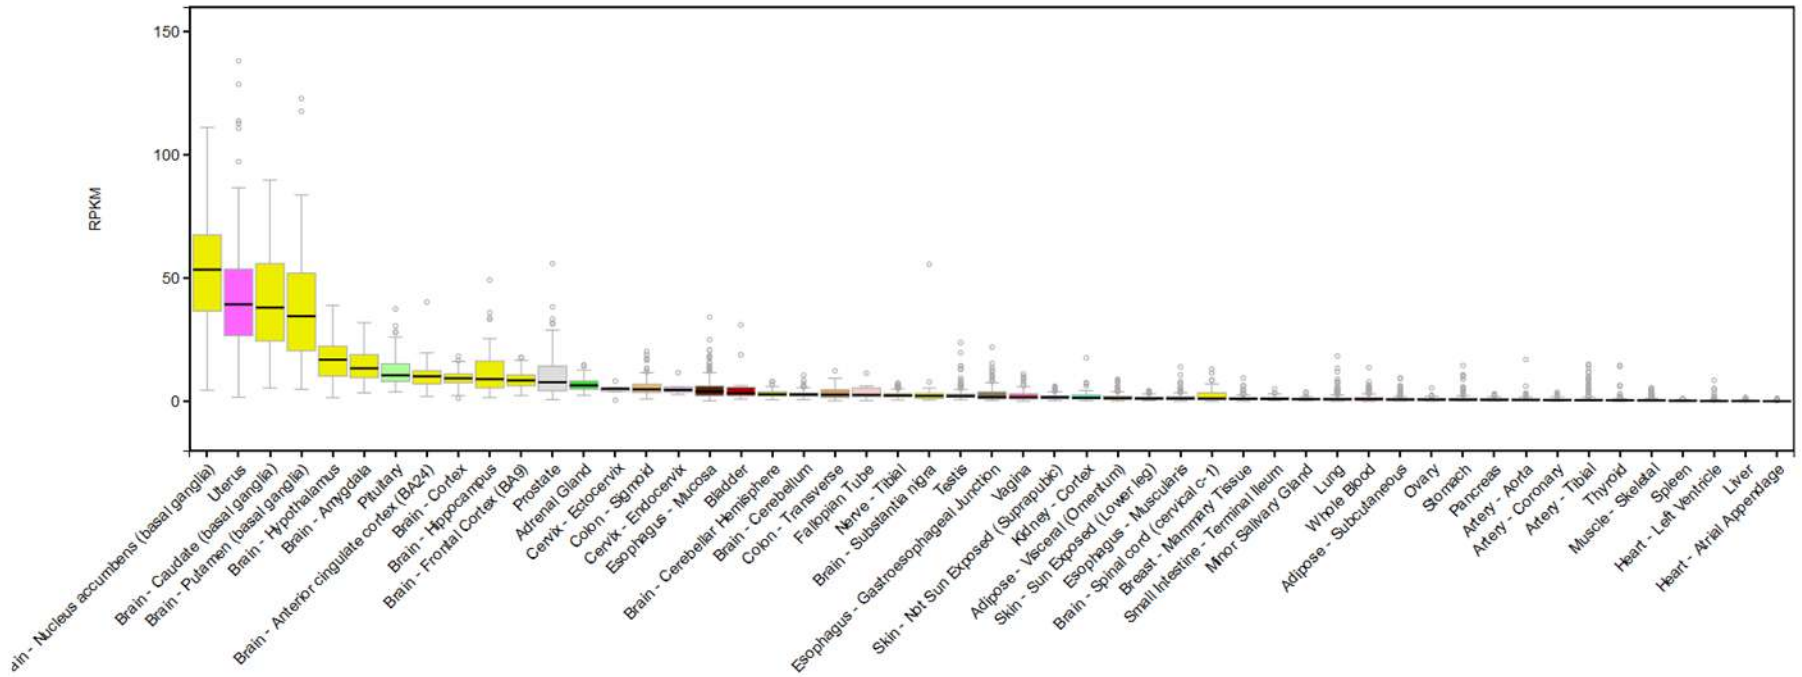

# CEBPB

Median RPKM of highest tissue: 183.668

Lung: 107.317

Pancreas: 15.543

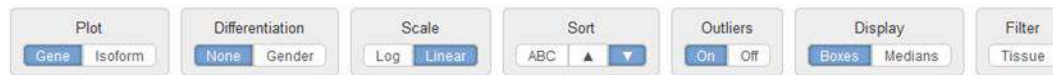

CEBPB Gene Expression

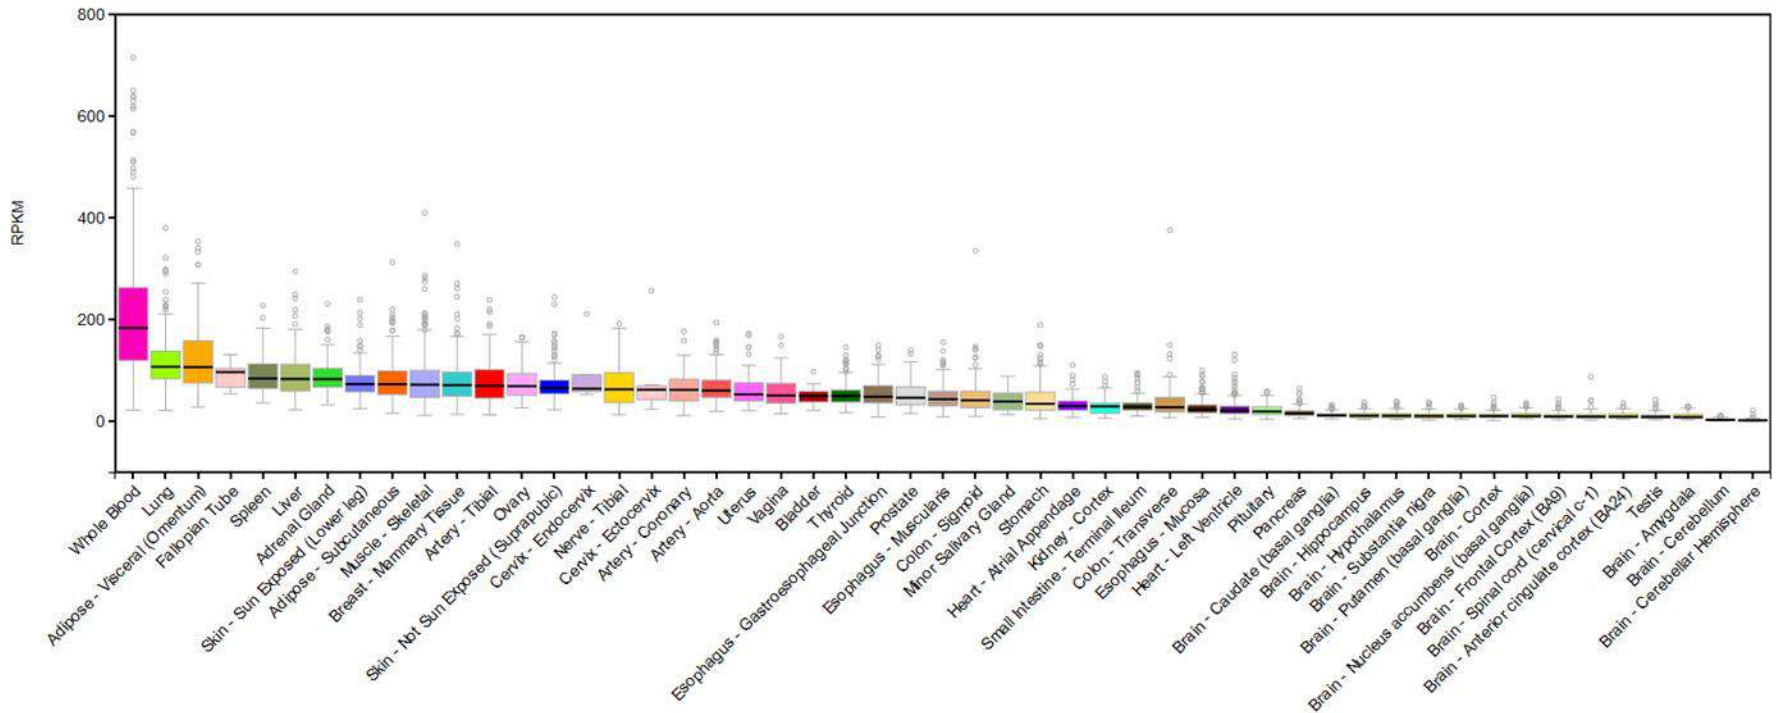

# CTDSP2

Median RPKM of highest tissue: 86.689

Plot:      Differentiation:      Scale:      Sort:       Outliers:      Display:      Filter:

CTDSP2 Gene Expression

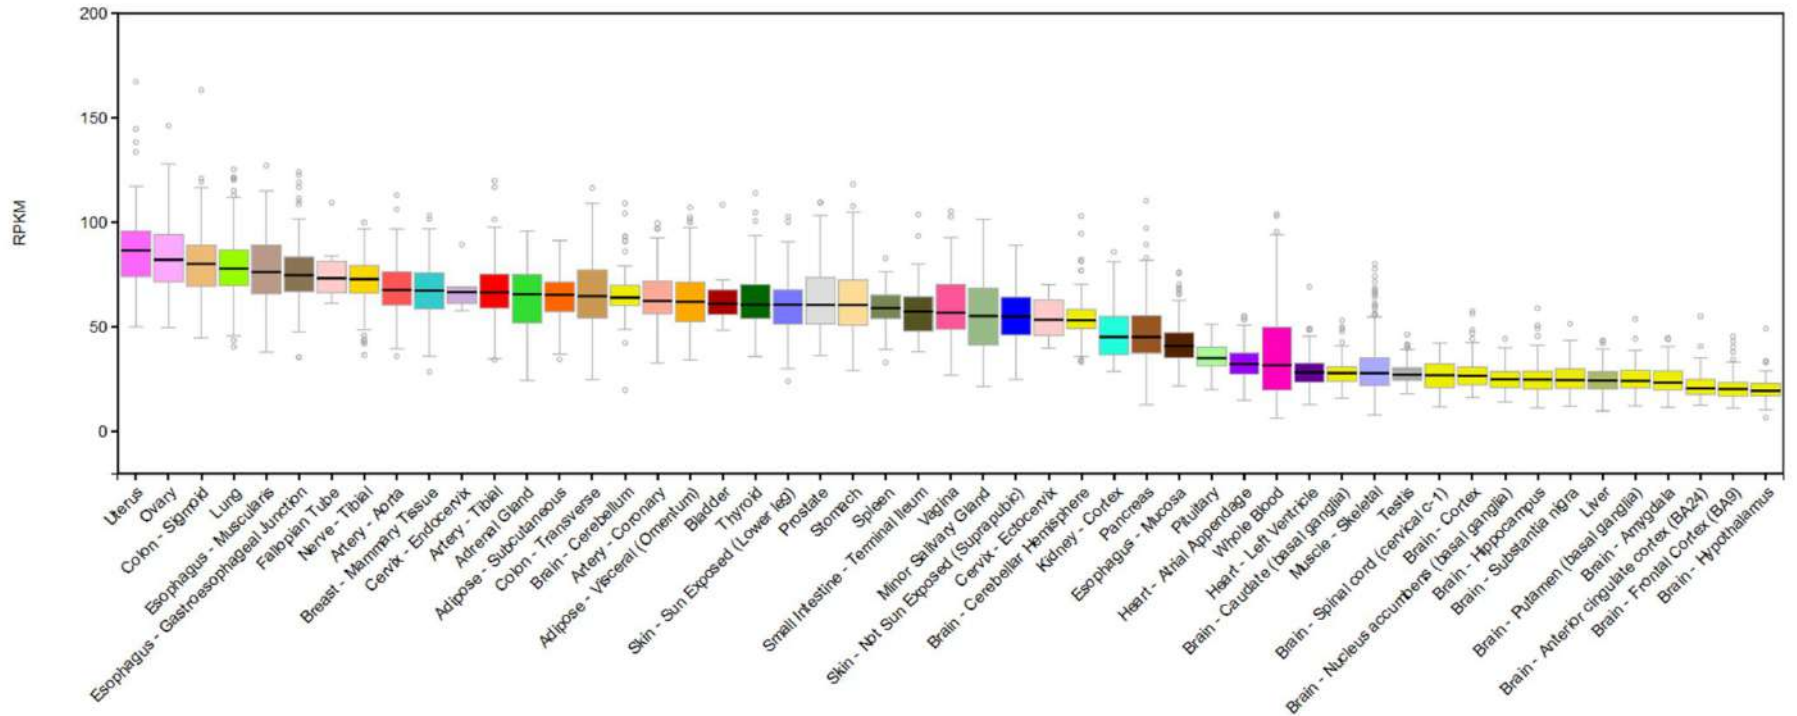



# CTDSPL

Median RPKM of highest tissue: 21.668

Plot:  Gene  Isoform

Differentiation:  None  Gender

Scale:  Log  Linear

Sort: ABC ▲ ▼

Outliers:  On  Off

Display:  Boxes  Medians

Filter:  Tissue

CTDSPL Gene Expression

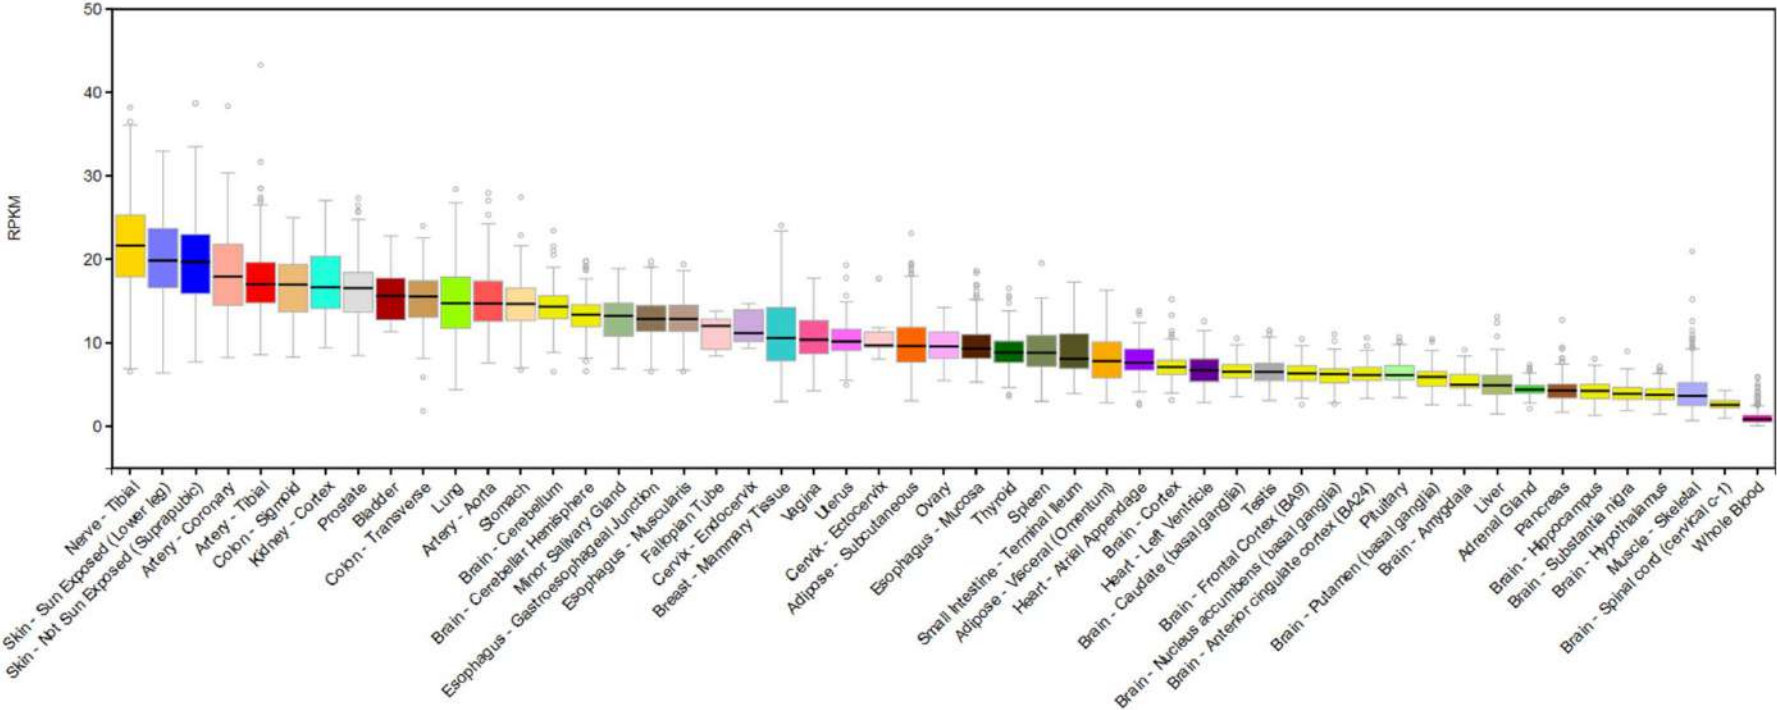

# CRABP1

Median RPKM of highest tissue: 71.468

Plot:  Gene  Isoform

Differentiation:  None  Gender

Scale:  Log  Linear

Sort: ABC

Outliers:  On  Off

Display:  Boxes  Medians

Filter:

CRABP1 Gene Expression

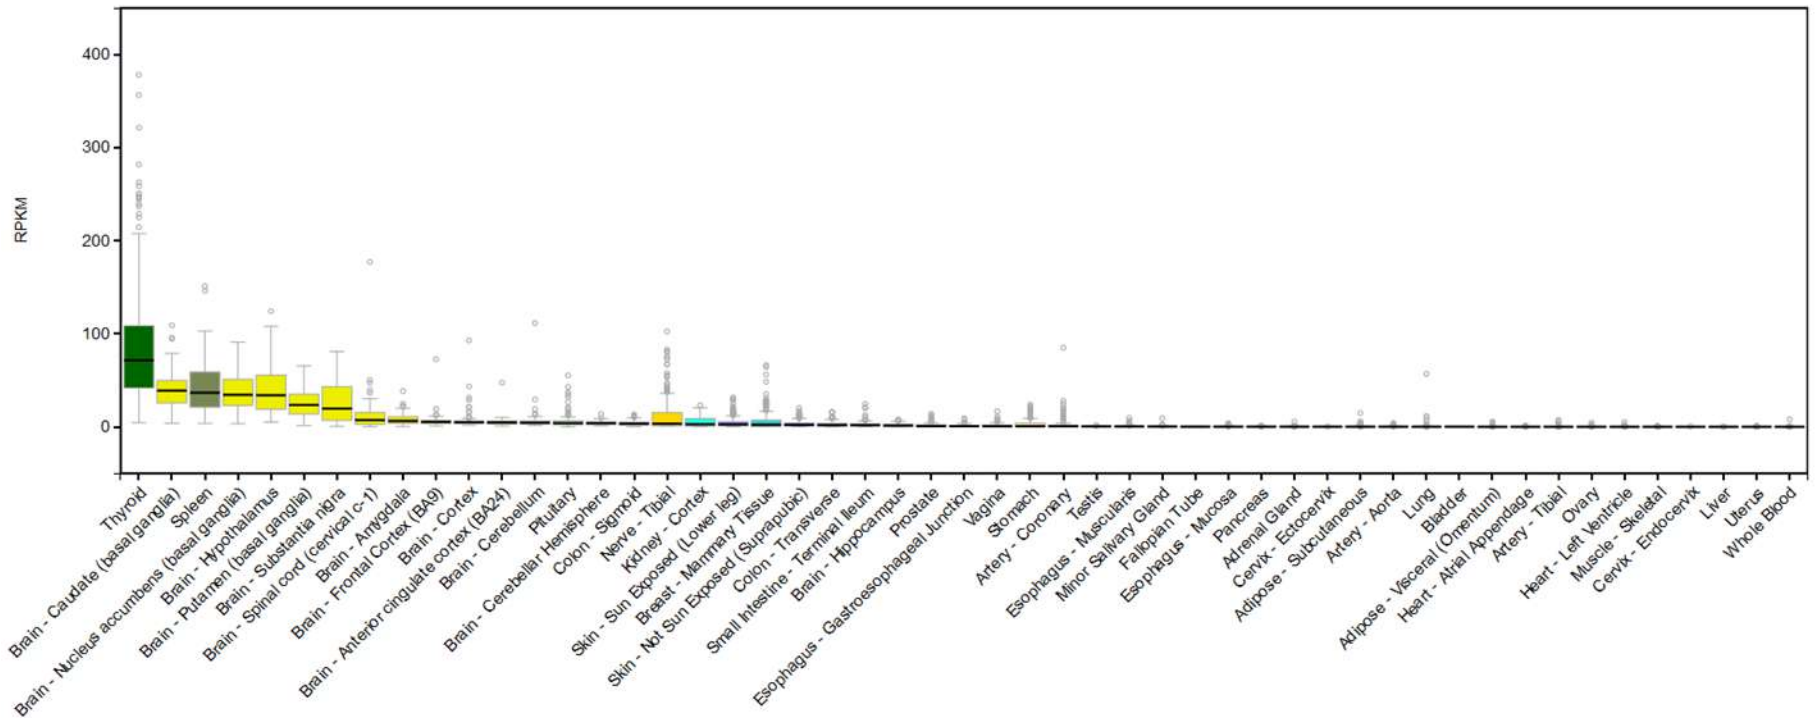



# S100A13

Median RPKM of highest tissue: 95.857

Plot:  Gene  Isoform

Differentiation:  None  Gender

Scale:  Log  Linear

Sort: ABC  ▲  ▼

Outliers:  On  Off

Display:  Boxes  Medians

Filter:  Tissue

S100A13 Gene Expression

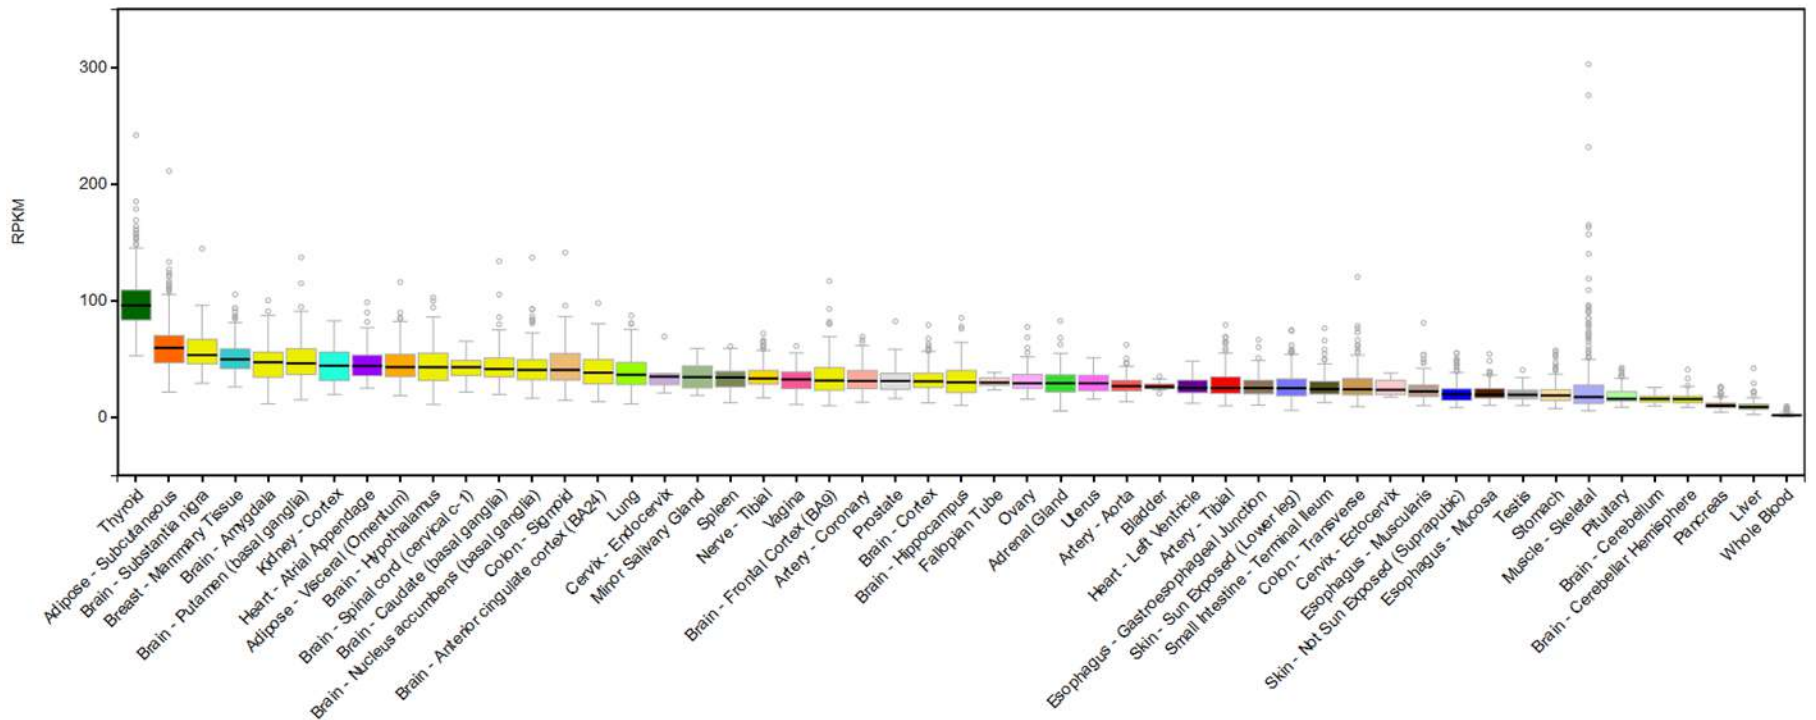

# CTDSP1

Median RPKM: 63.724

Plot:  Gene  Isoform

Differentiation:  None  Gender

Scale:  Log  Linear

Sort: ABC ▲ ▼

Outliers:  On  Off

Display:  Boxes  Medians

Filter:

CTDSP1 Gene Expression

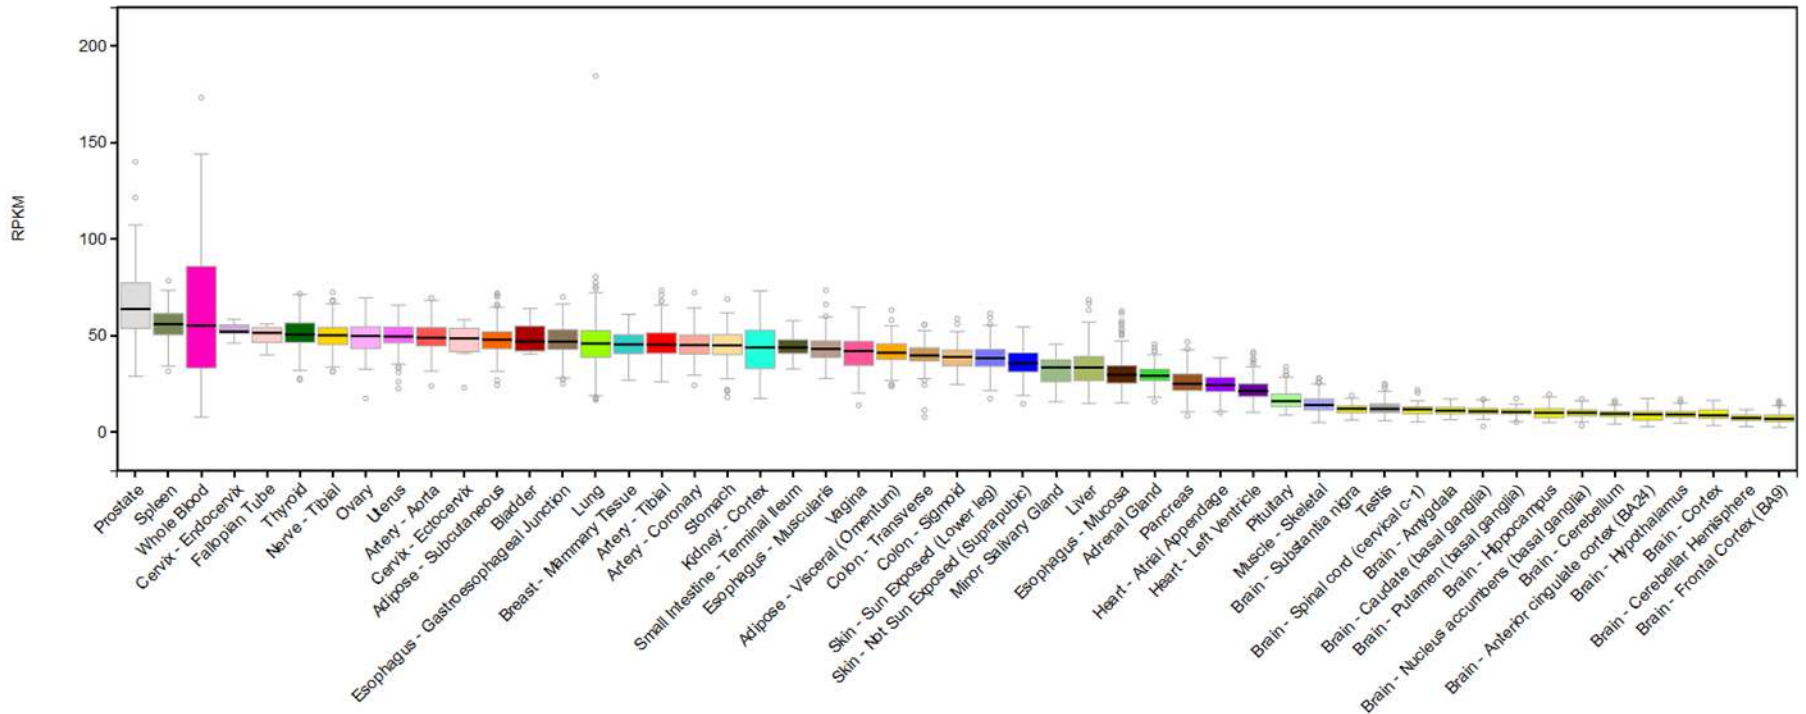

# AASDHPPT

Median RPKM: 39.770

Plot:      Differentiation:      Scale:      Sort:       Outliers:      Display:      Filter:

AASDHPPT Gene Expression

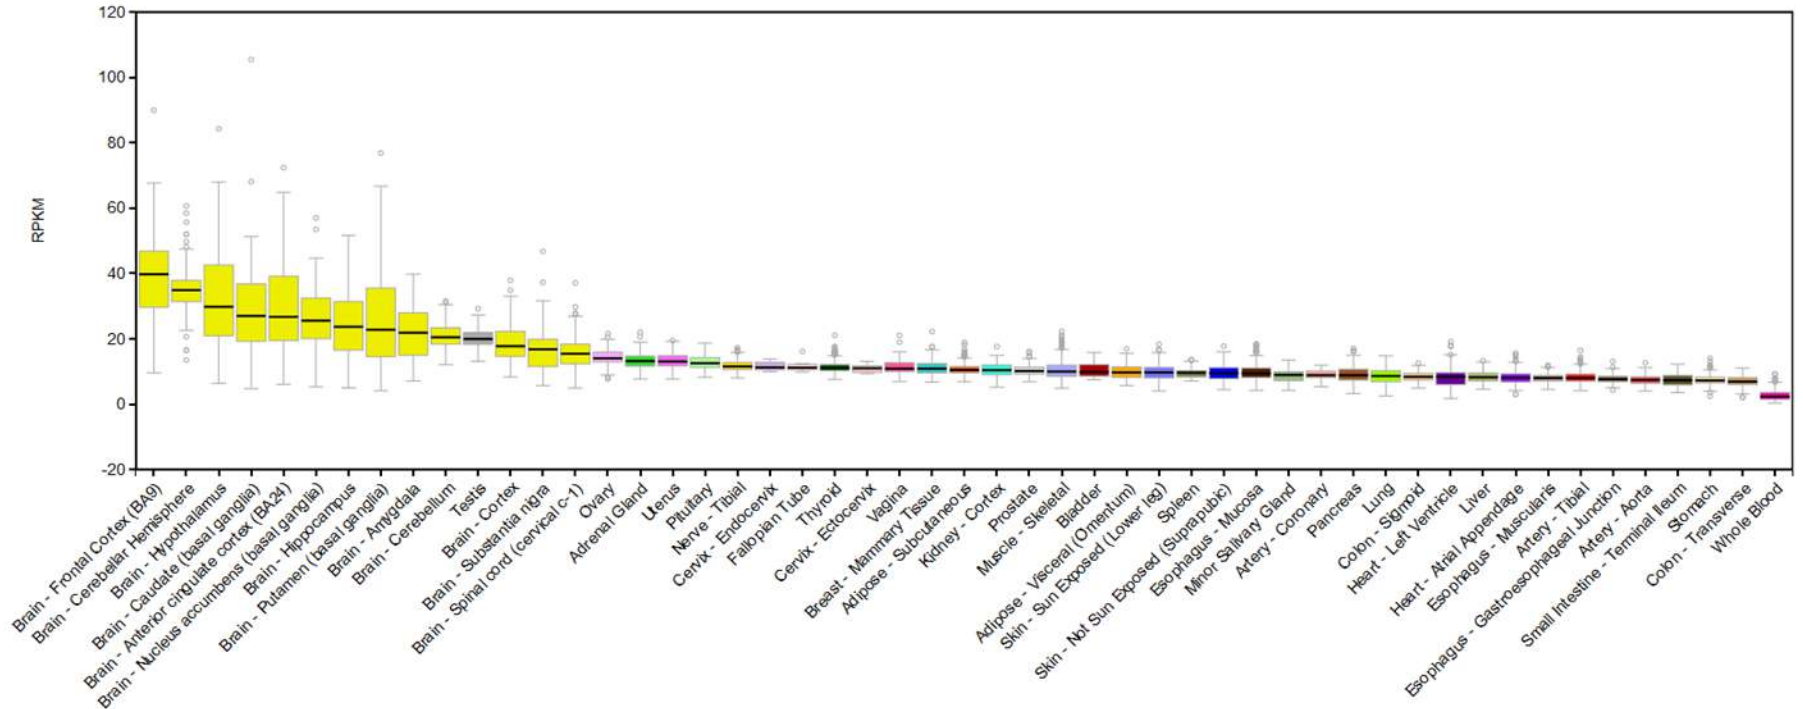

# LGALS1

Median RPKM of highest tissue: 779.492

Plot:      Differentiation:      Scale:      Sort:       Outliers:      Display:      Filter:

LGALS1 Gene Expression

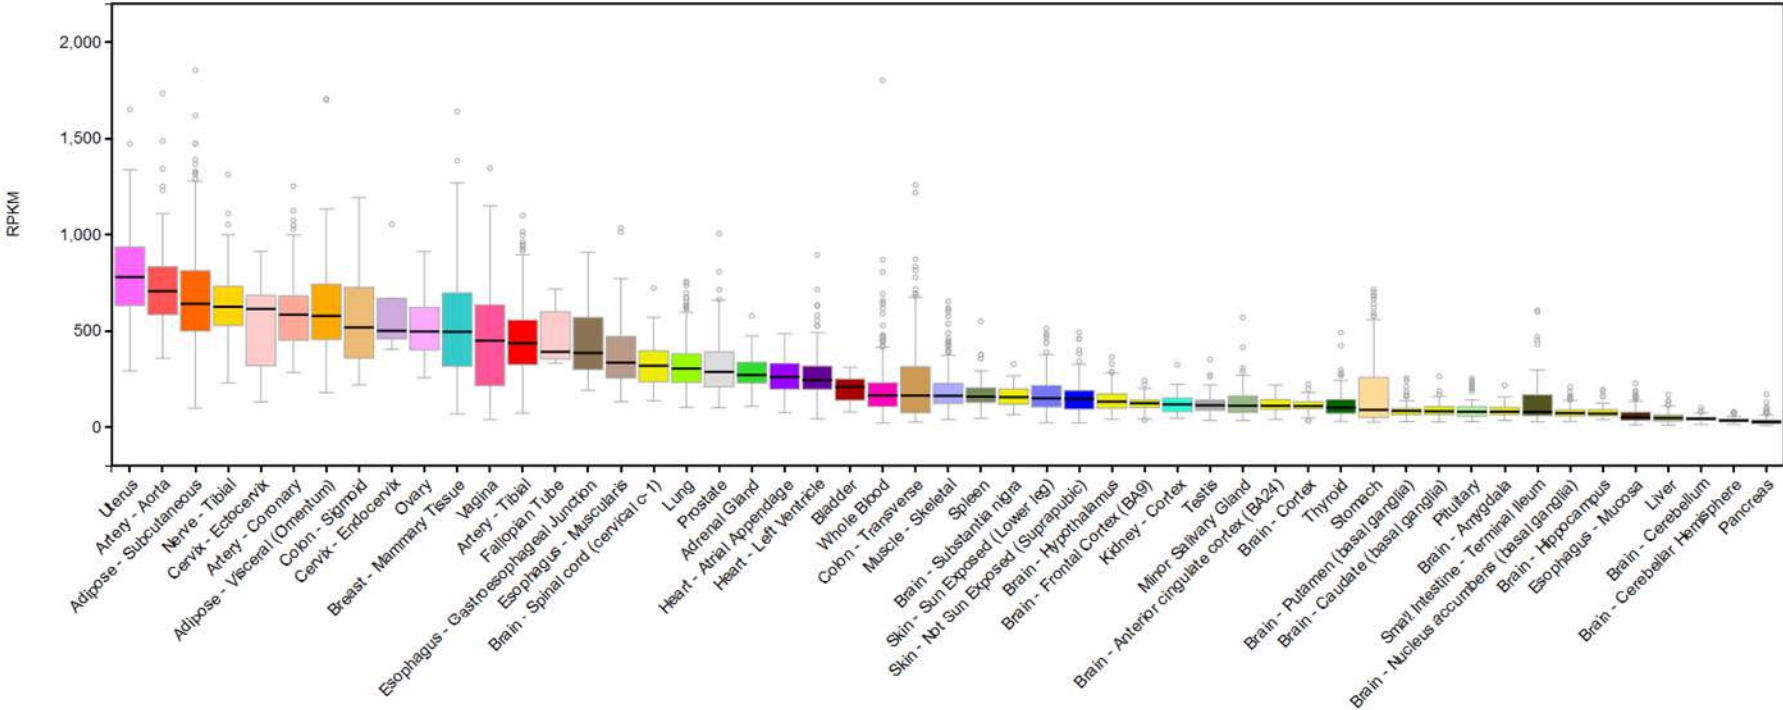

# TSEN34

Median RPKM of highest tissue: 47.212

Pancreas: 12.385

Plot:  Gene  Isoform

Differentiation:  None  Gender

Scale:  Log  Linear

Sort: ABC  ▲  ▼

Outliers:  On  Off

Display:  Boxes  Medians

Filter:  Tissue

TSEN34 Gene Expression

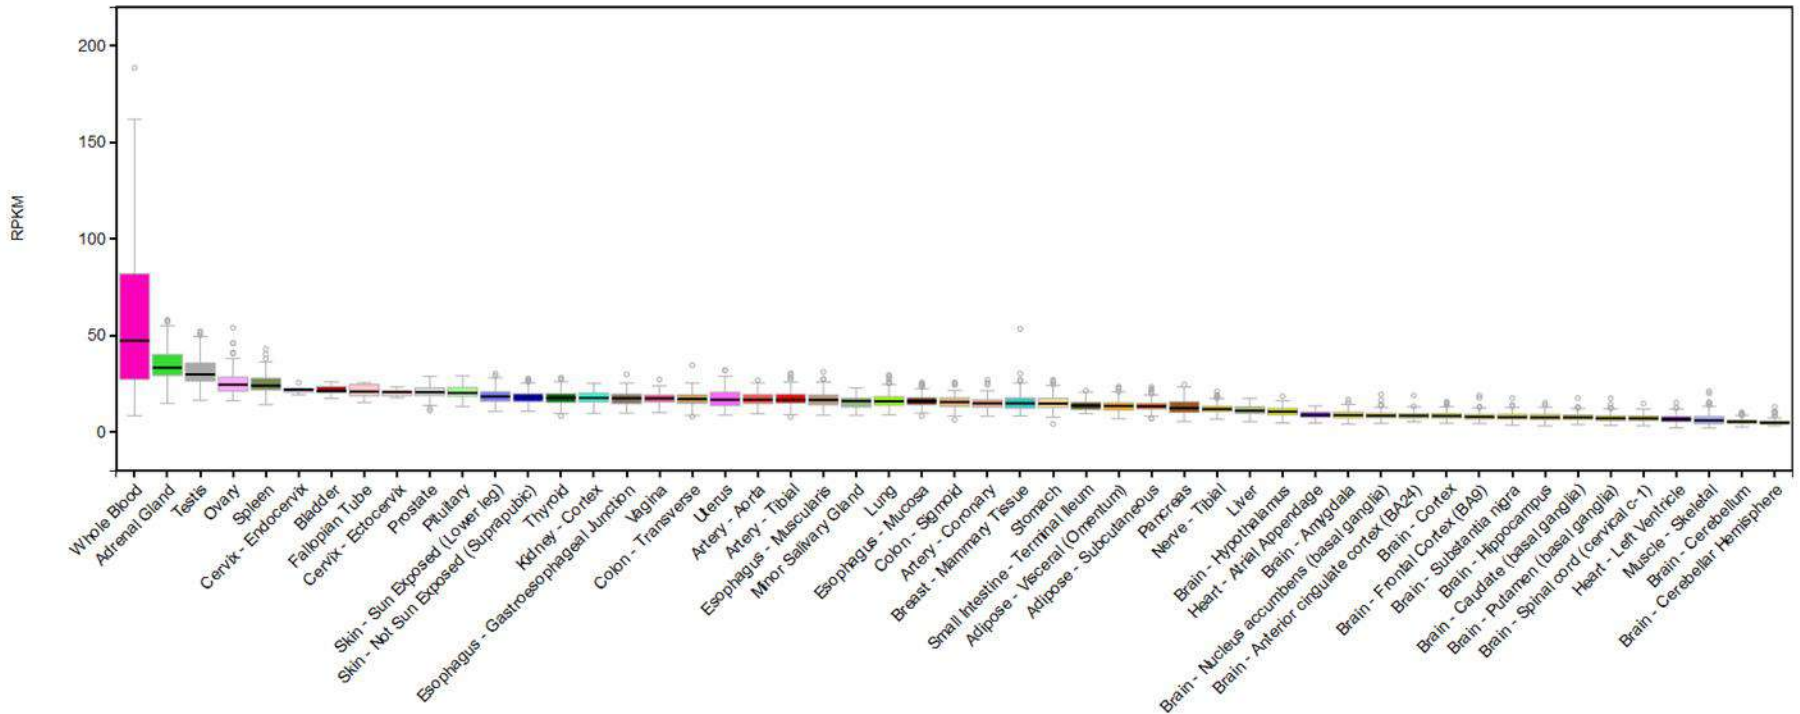

# SLC34A2

Median RPKM of highest tissue: 231.278

Kidney Cortex: 8.719

Plot:      Differentiation:      Scale:      Sort:       Outliers:      Display:      Filter:

SLC34A2 Gene Expression

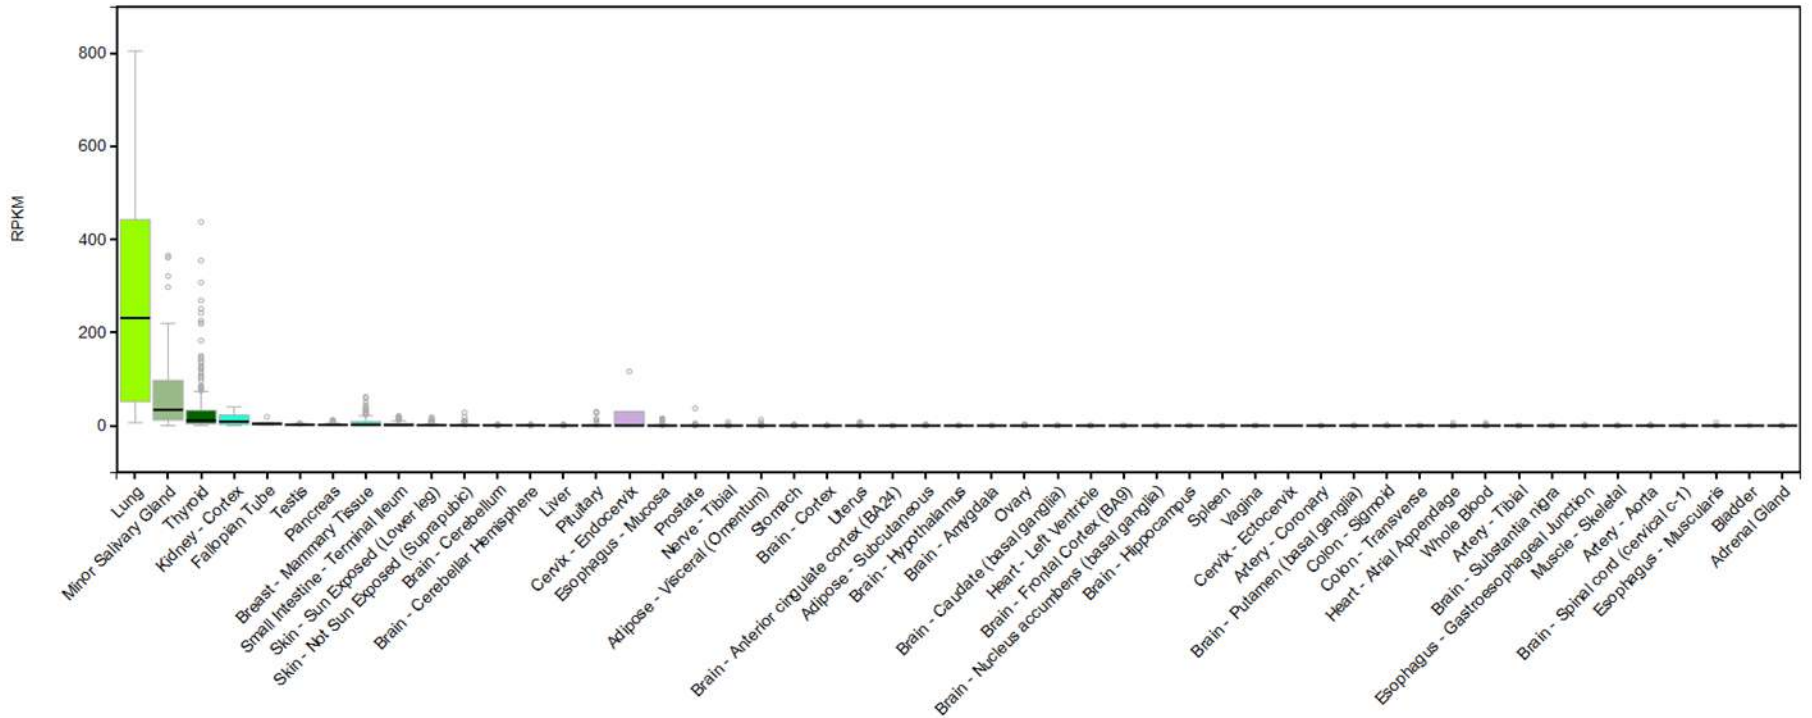



# COL1A1

Median RPKM of highest tissue: 407.886

Lung: 65.612

Plot:  Gene  Isoform

Differentiation:  None  Gender

Scale:  Log  Linear

Sort: ABC ▲ ▼

Outliers:  On  Off

Display:  Boxes  Medians

Filter:

COL1A1 Gene Expression

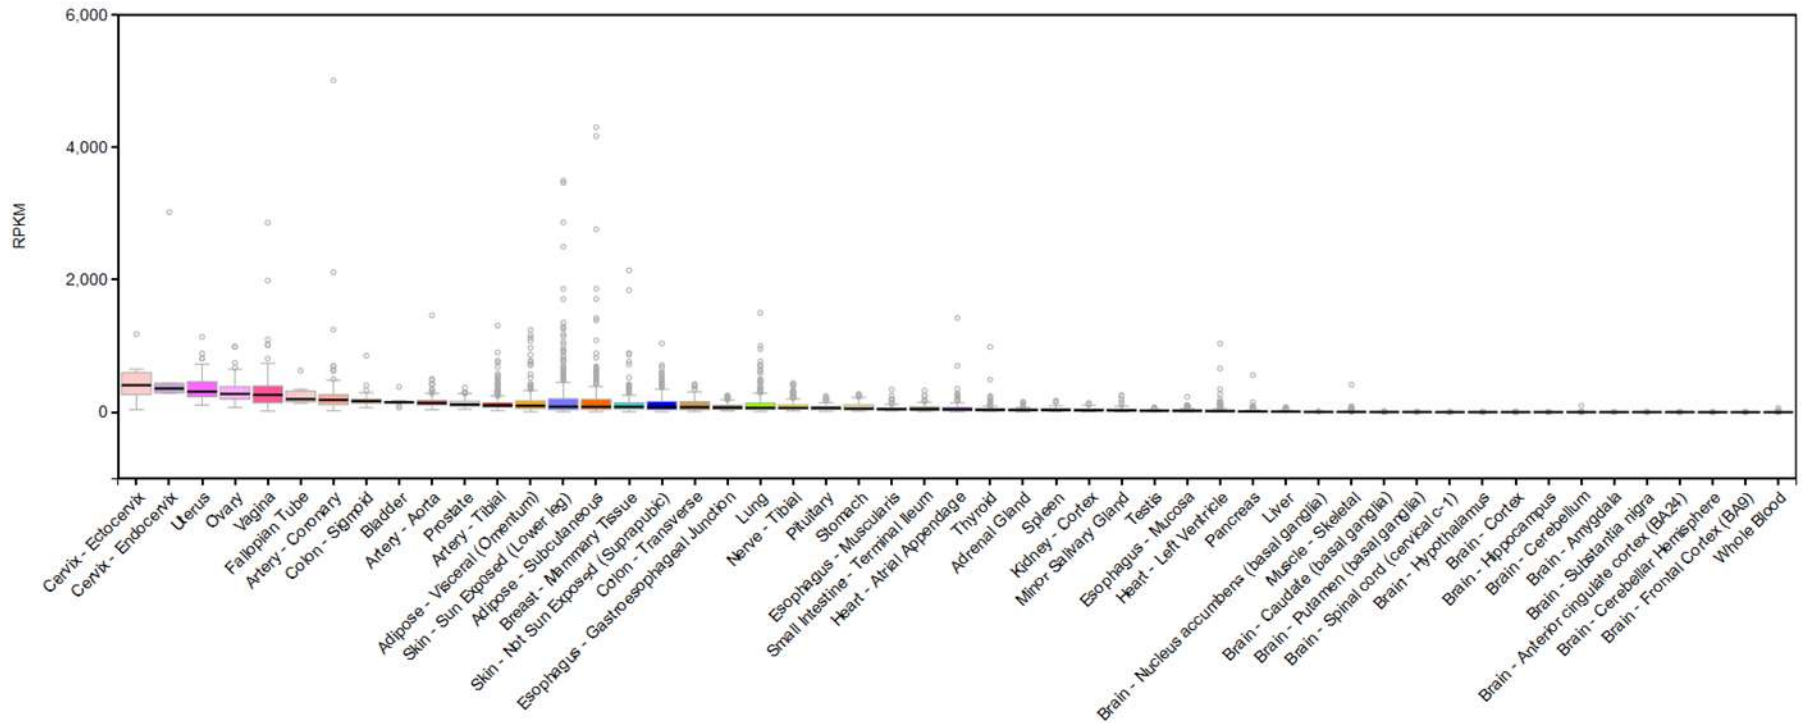

# DNASE1

Median RPKM of highest tissue: 21.229

Plot:  Gene  Isoform

Differentiation:  None  Gender

Scale:  Log  Linear

Sort: ABC ▲ ▼

Outliers:  On  Off

Display:  Boxes  Medians

Filter:

DNASE1 Gene Expression

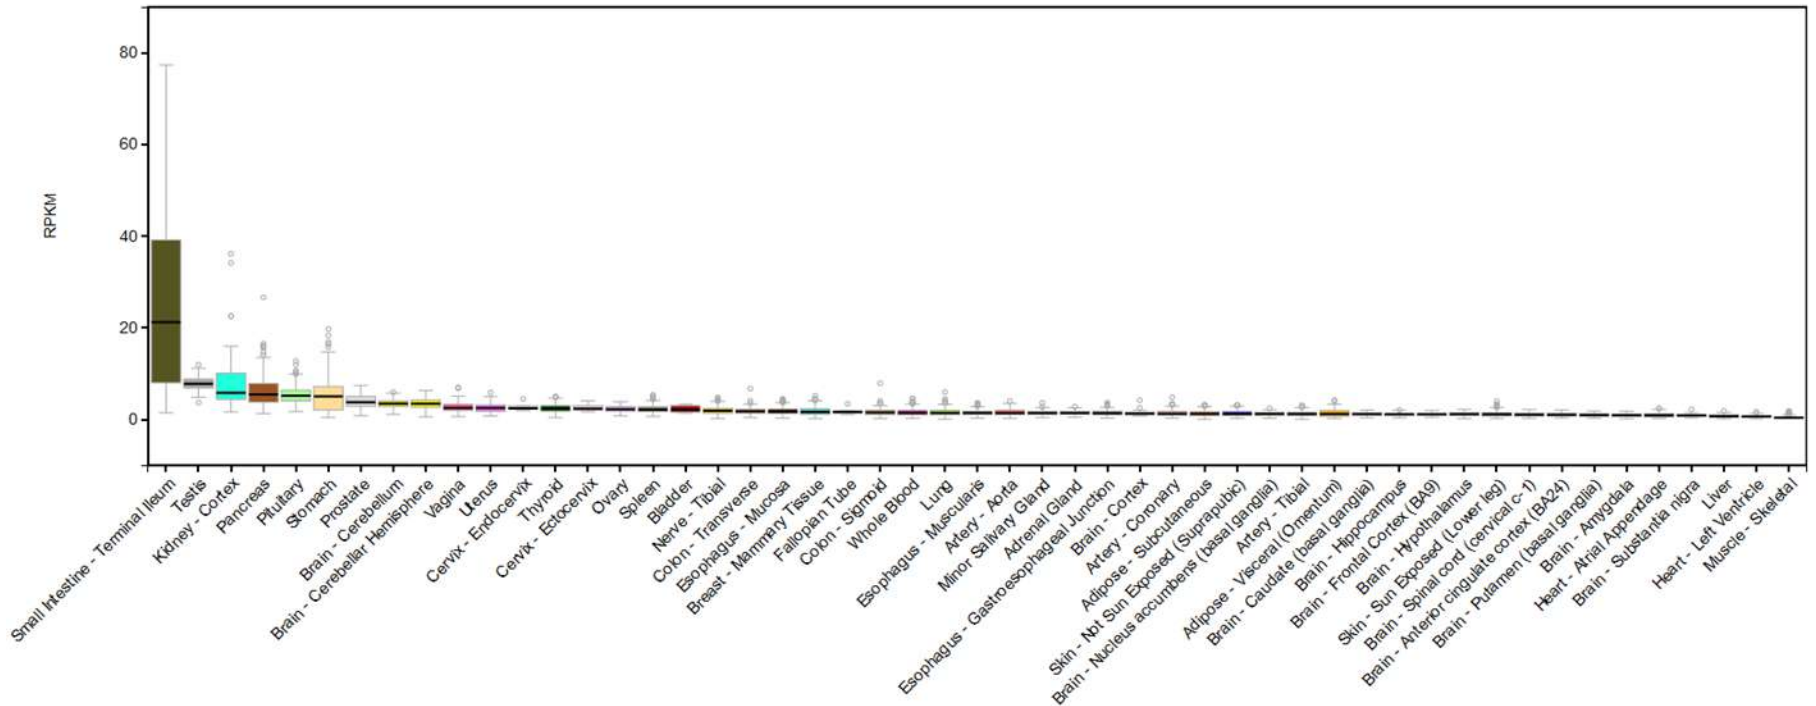



# ID4

Median RPKM: 165.066

Plot:  Gene  Isoform

Differentiation:  None  Gender

Scale:  Log  Linear

Sort: ABC  ▲  ▼

Outliers:  On  Off

Display:  Boxes  Medians

Filter:  Tissue

ID4 Gene Expression

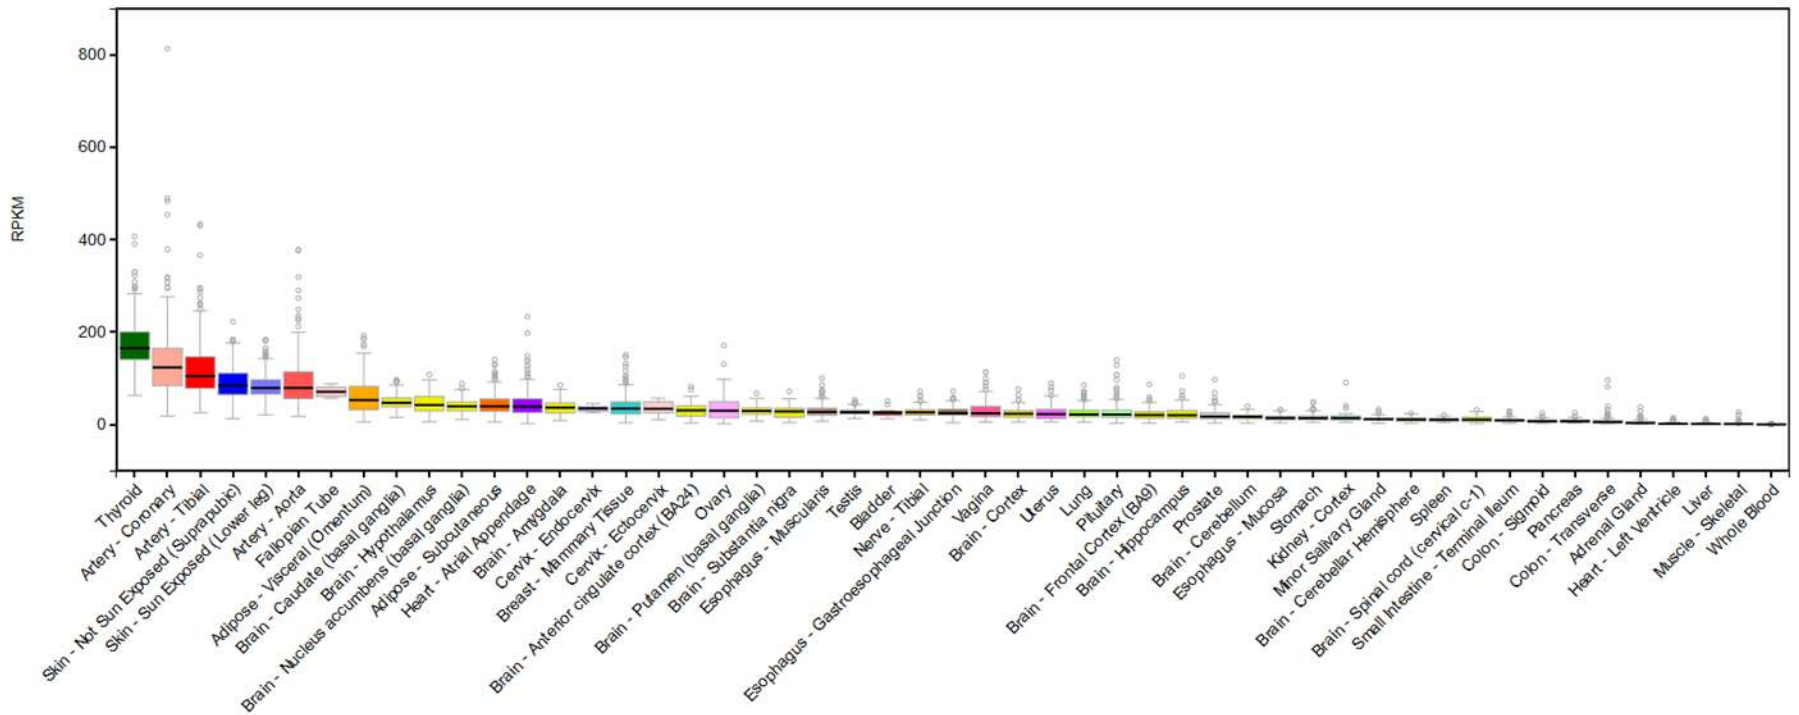

# EFHC1

Median RPKM: 16.696

Plot:  Gene  Isoform

Differentiation:  None  Gender

Scale:  Log  Linear

Sort: ABC ▲ ▼

Outliers:  On  Off

Display:  Boxes  Medians

Filter:

EFHC1 Gene Expression

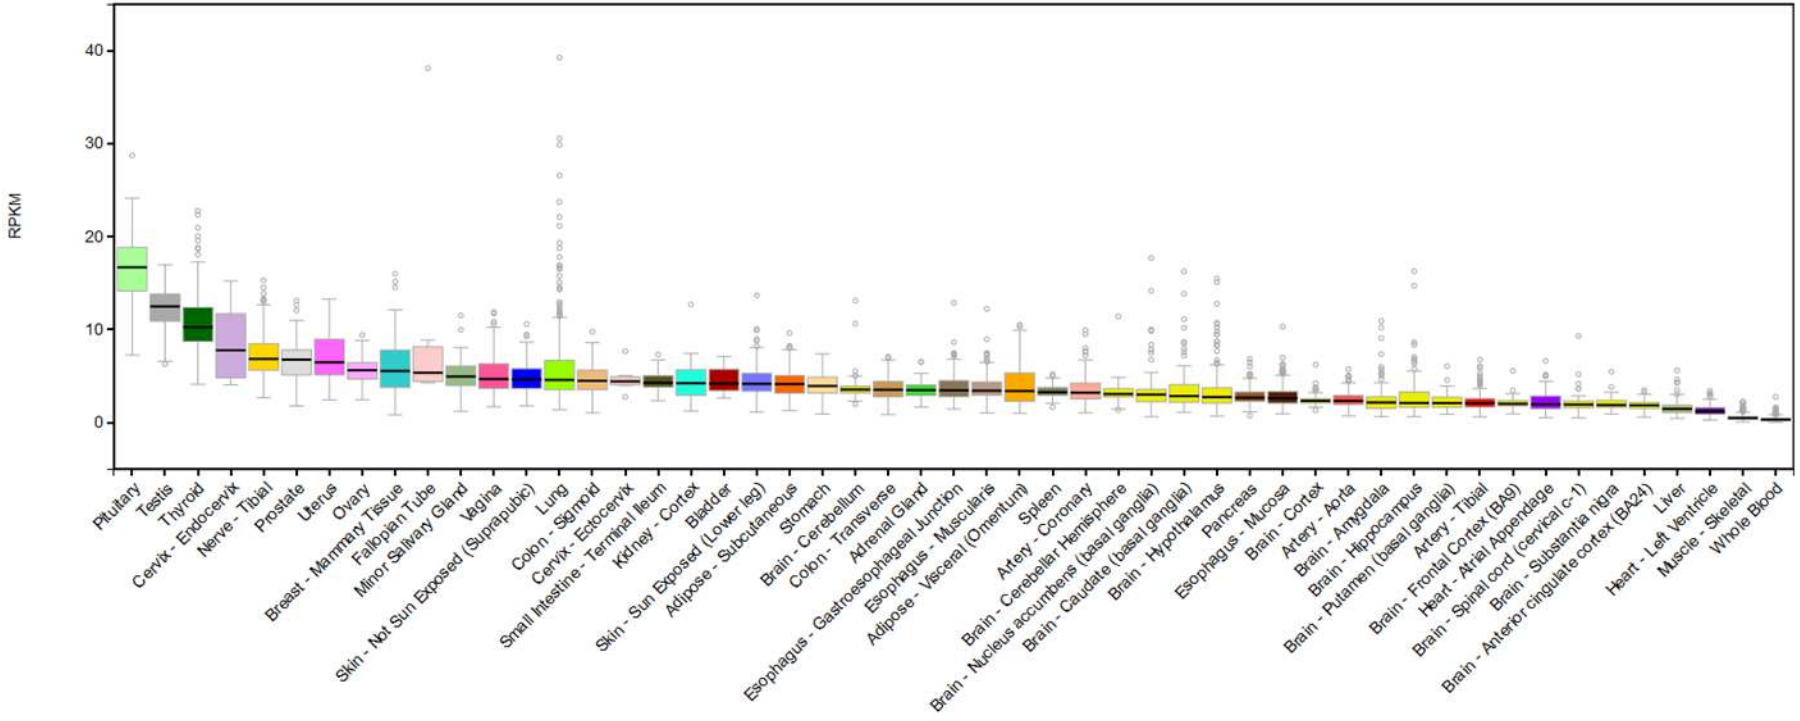

# EPS8L1

Median RPKM: 128.564

Fallopian tube: 8.766

Plot:  Gene  Isoform

Differentiation:  None  Gender

Scale:  Log  Linear

Sort: ABC ▲ ▼

Outliers:  On  Off

Display:  Boxes  Medians

Filter:

EPS8L1 Gene Expression

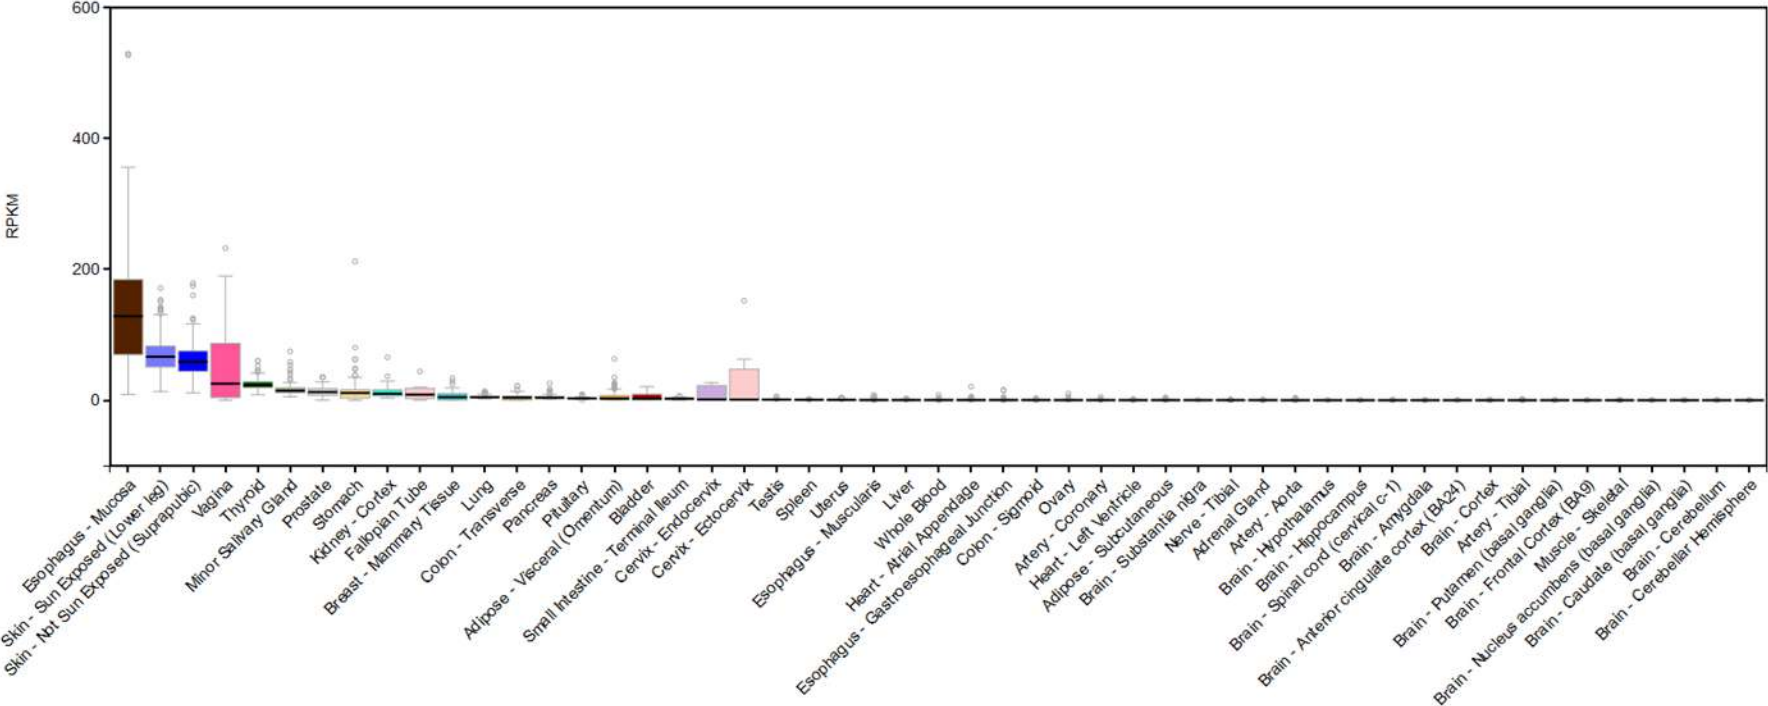

# MYOF

Median RPKM of highest tissue: 41.847

Plot:  Gene  Isoform

Differentiation:  None  Gender

Scale:  Log  Linear

Sort: ABC  ▲  ▼

Outliers:  On  Off

Display:  Boxes  Medians

Filter:  Tissue

MYOF Gene Expression

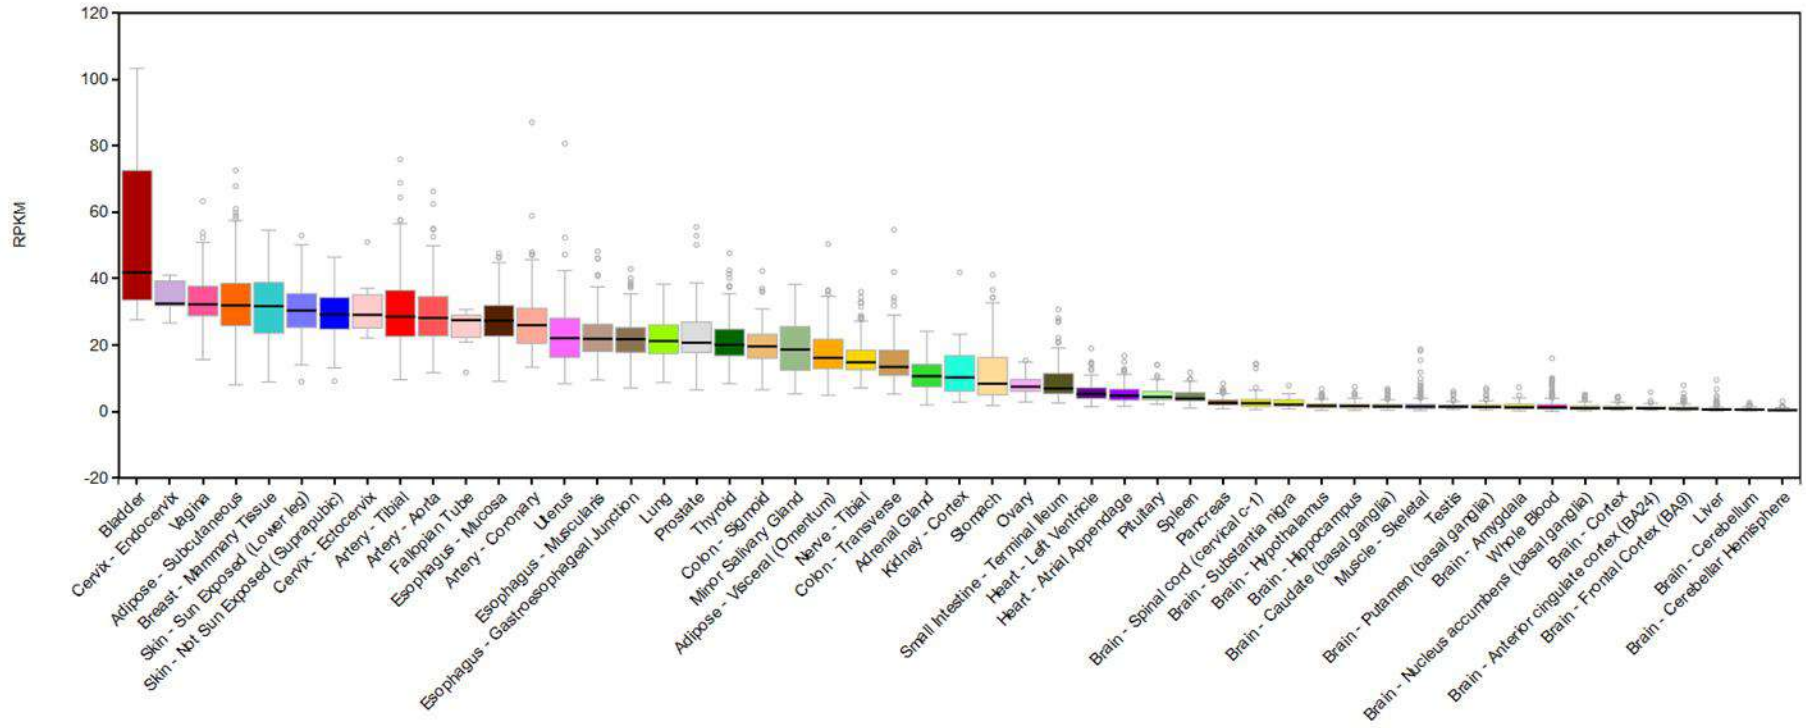

# MANBA

Median RPKM of highest tissue: 16.194

MANBA Gene Expression

Plot:  Gene  Isoform

Differentiation:  None  Gender

Scale:  Log  Linear

Sort: ABC  ▲  ▼

Outliers:  On  Off

Display:  Boxes  Medians

Filter:  Tissue

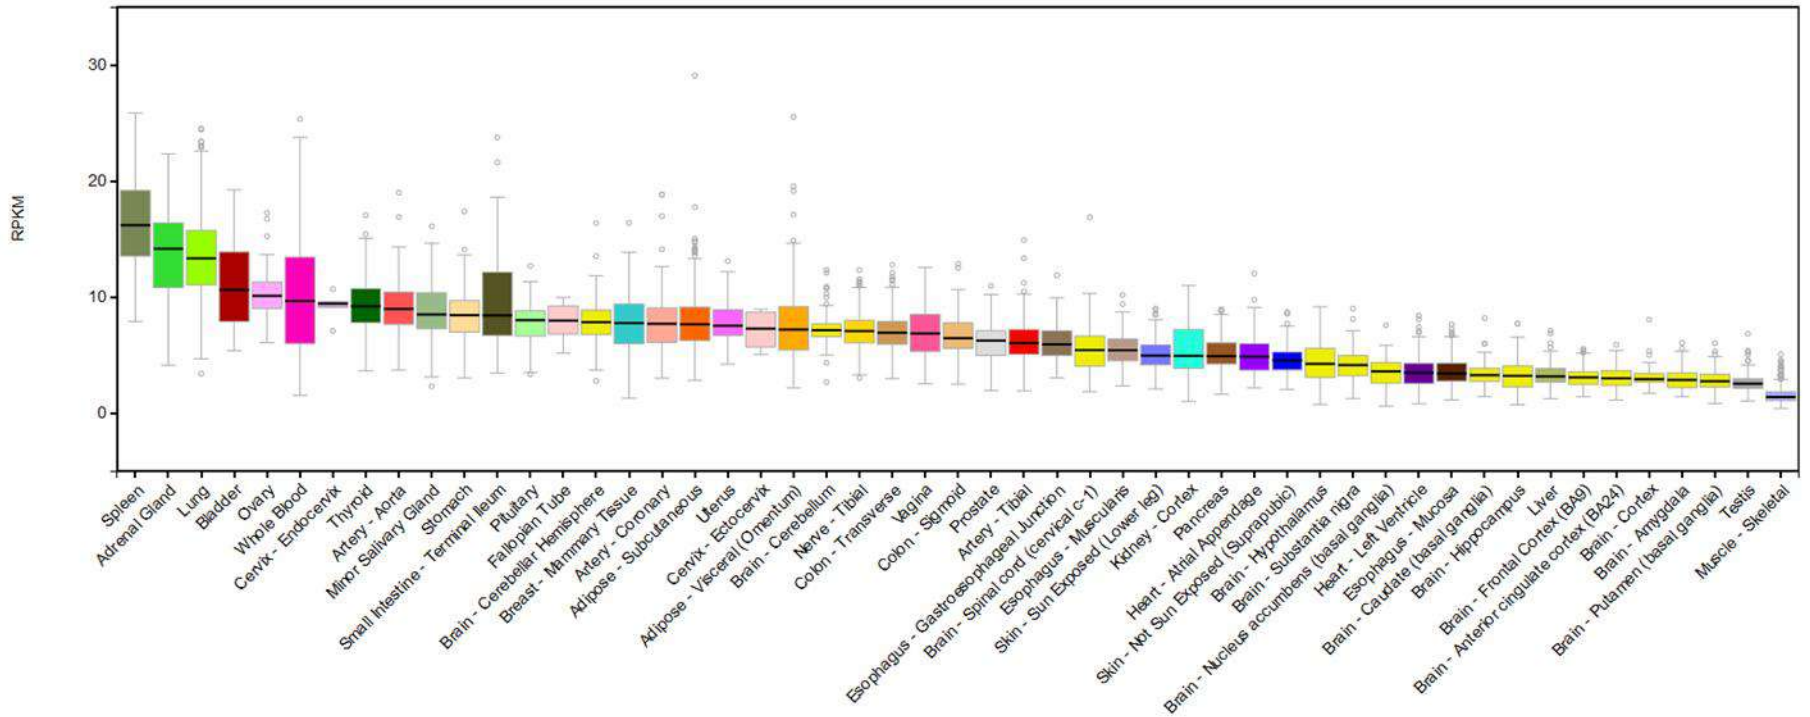

# ZNF217

Median RPKM of highest tissue: 13.648

Plot:      Differentiation:      Scale:      Sort:       Outliers:      Display:      Filter:

ZNF217 Gene Expression

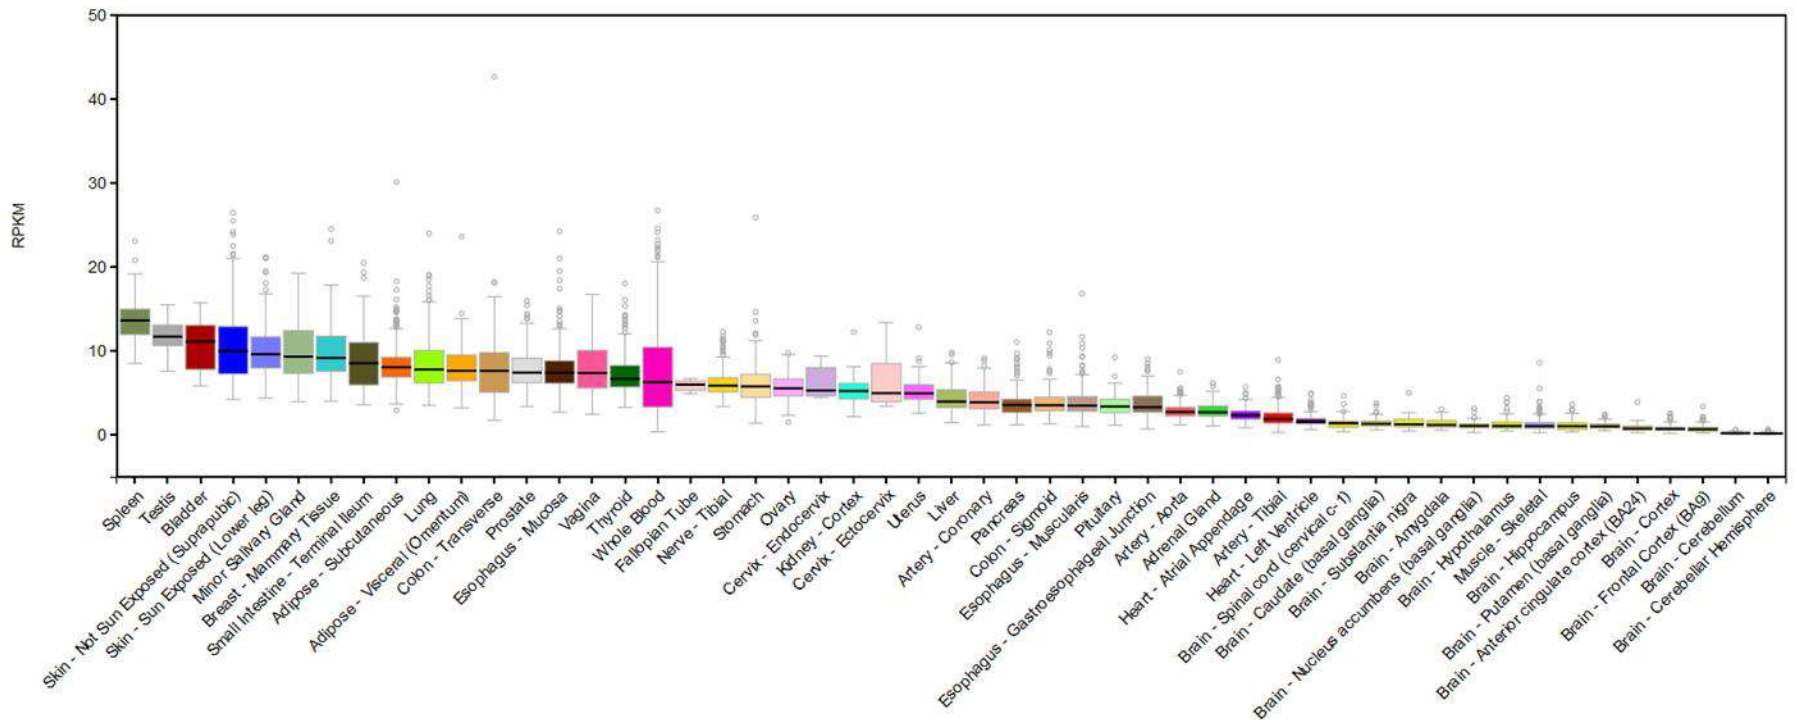



# PTPRF

Median RPKM of highest tissue: 47.961

Plot:  Gene  Isoform

Differentiation:  None  Gender

Scale:  Log  Linear

Sort: ABC ▲ ▼

Outliers:  On  Off

Display:  Boxes  Medians

Filter:  Tissue

PTPRF Gene Expression

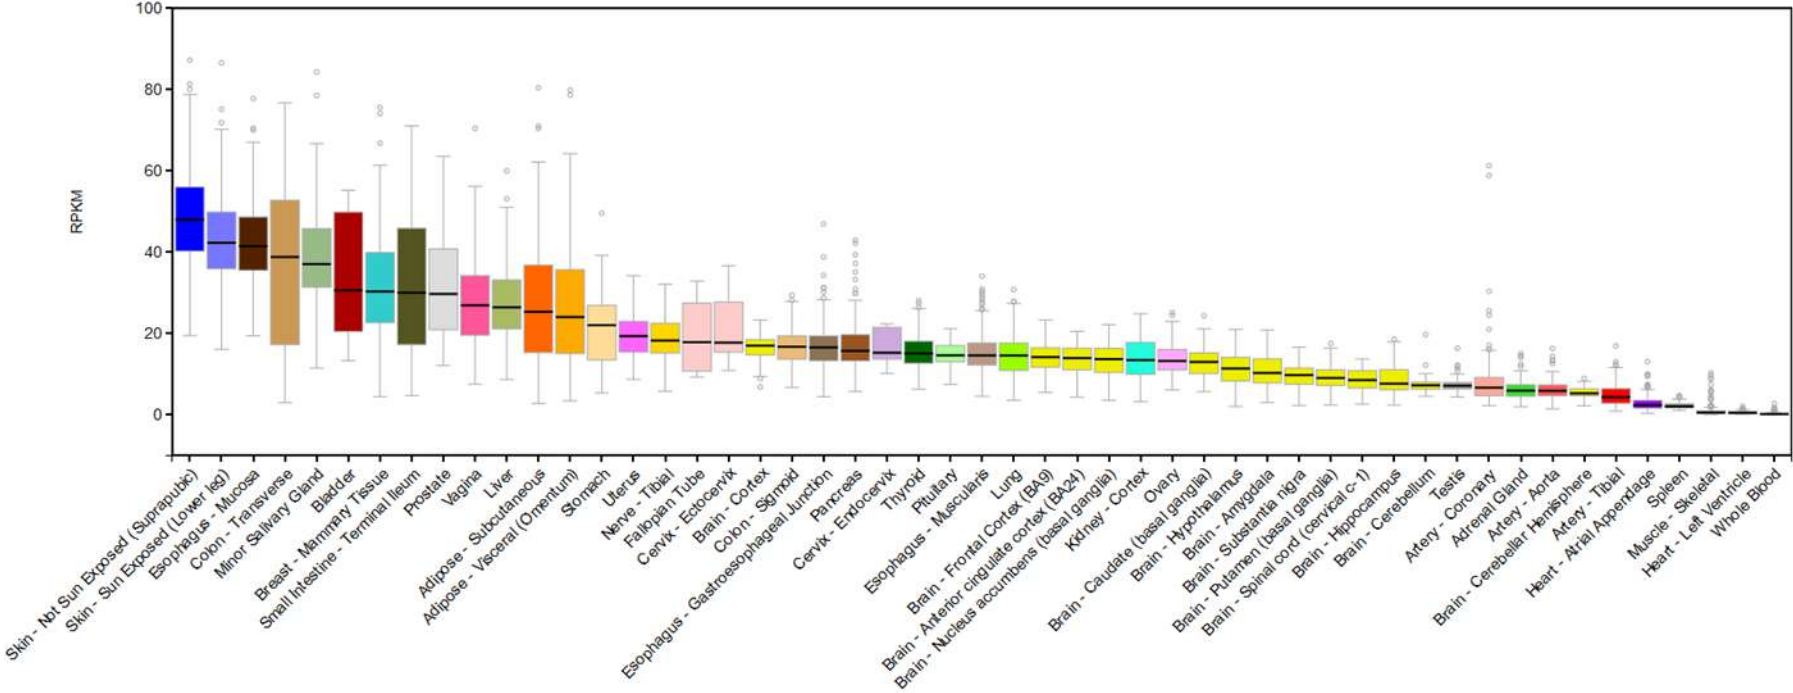

# FOLR1

Median RPKM of highest tissue: 42.230

Pituitary: 3.016

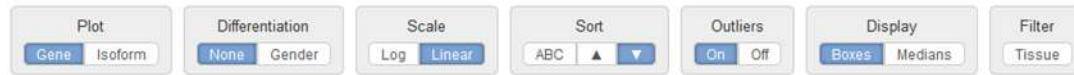

FOLR1 Gene Expression

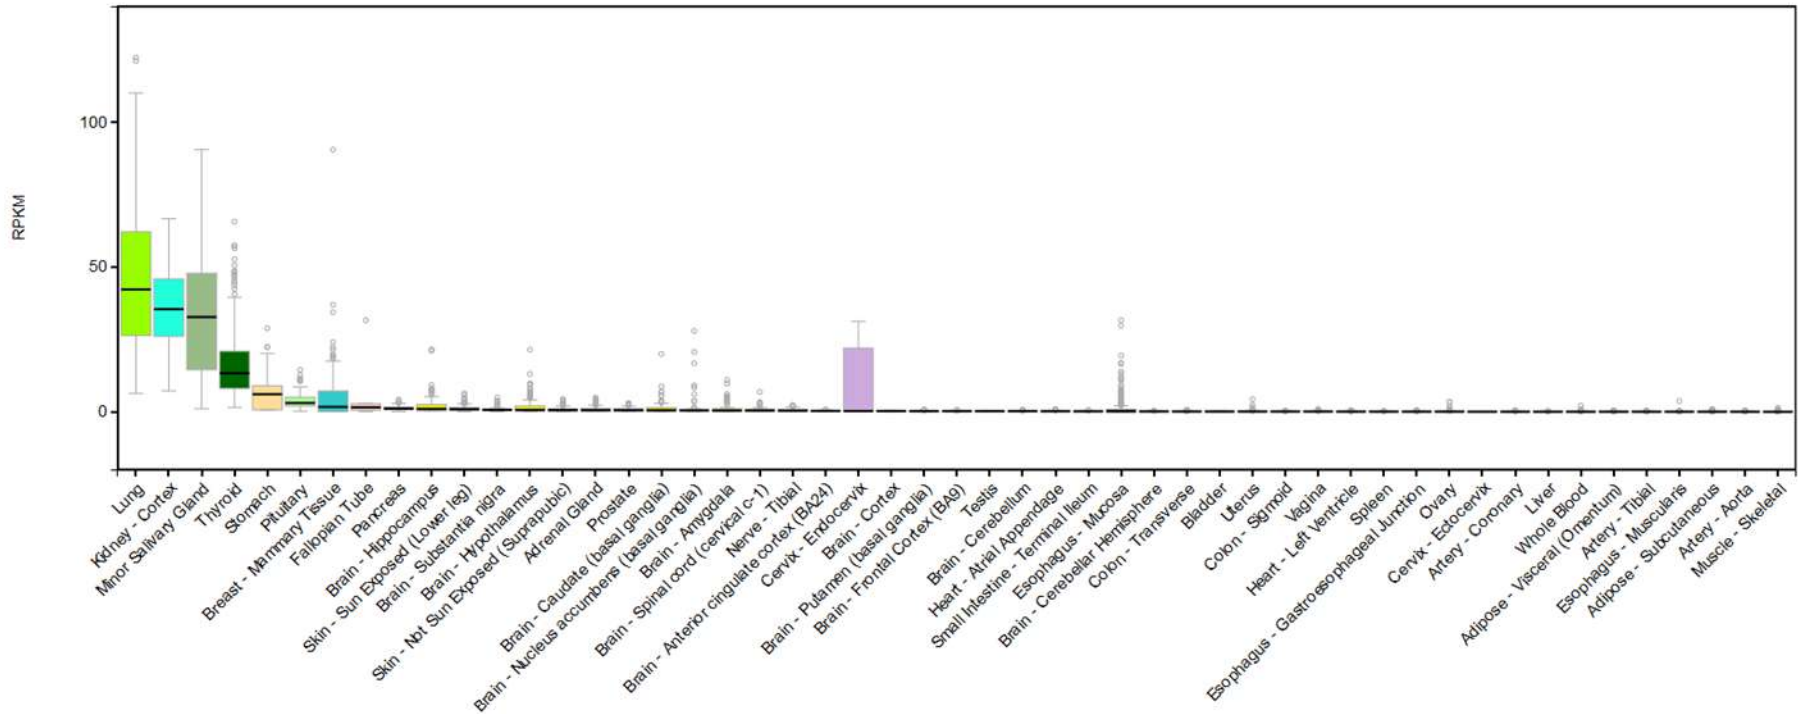



# FEN1

Median RPKM of highest tissue: 22.980

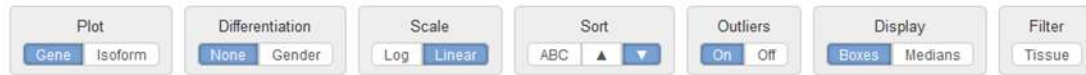

FEN1 Gene Expression

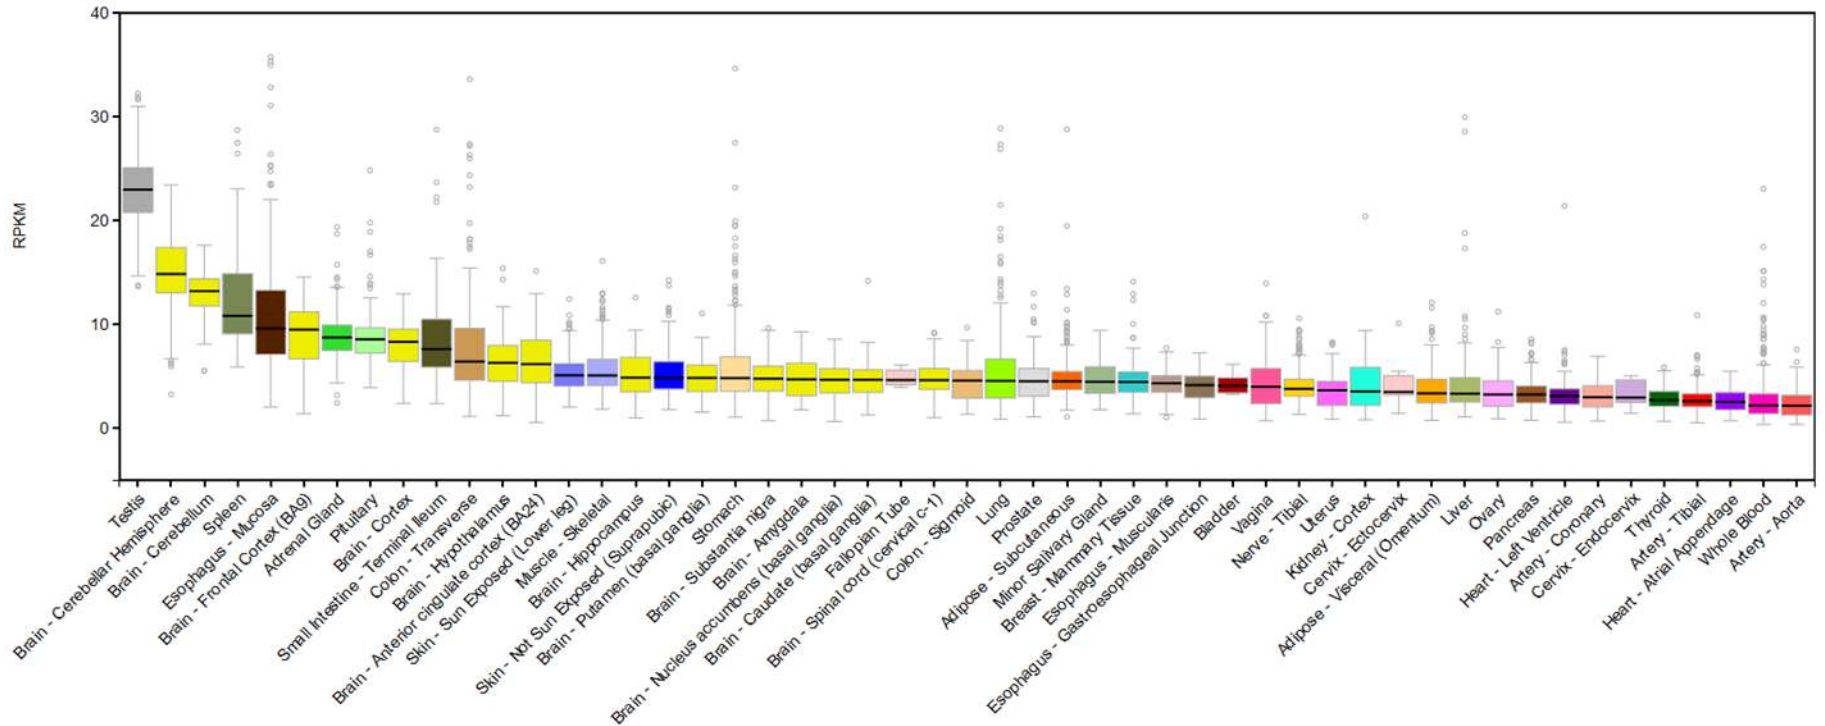

# LAMC2

Median RPKM of highest tissue: 10.372

Plot:  Gene  Isoform

Differentiation:  None  Gender

Scale:  Log  Linear

Sort: ABC  ▲  ▼

Outliers:  On  Off

Display:  Boxes  Medians

Filter:  Tissue

LAMC2 Gene Expression

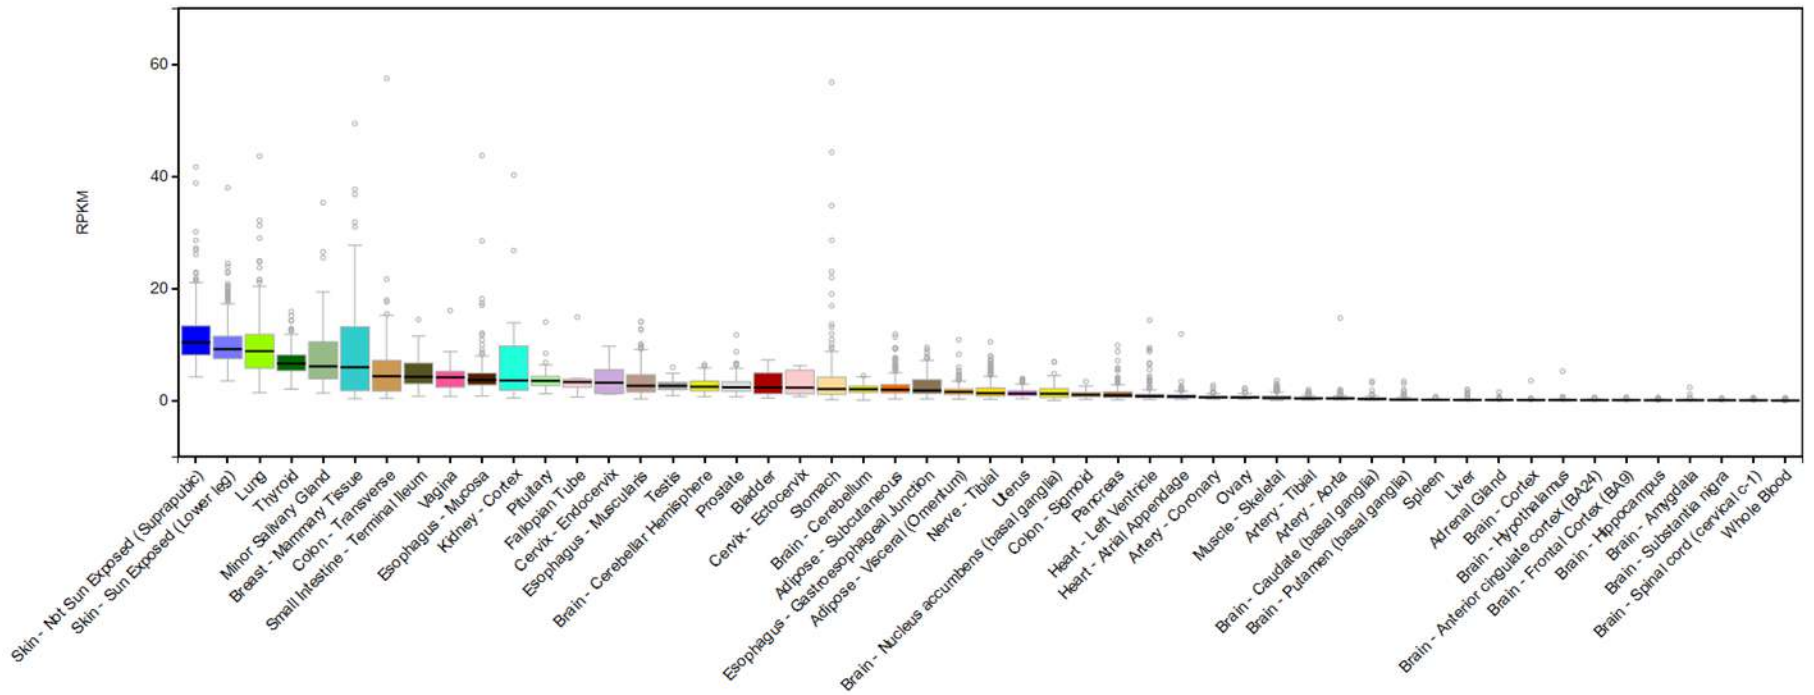

# ATP13A5

Median RPKM of highest tissue: 1.651

Plot:  Gene  Isoform

Differentiation:  None  Gender

Scale:  Log  Linear

Sort: ABC ▲ ▼

Outliers:  On  Off

Display:  Boxes  Medians

Filter:  Tissue

ATP13A5 Gene Expression

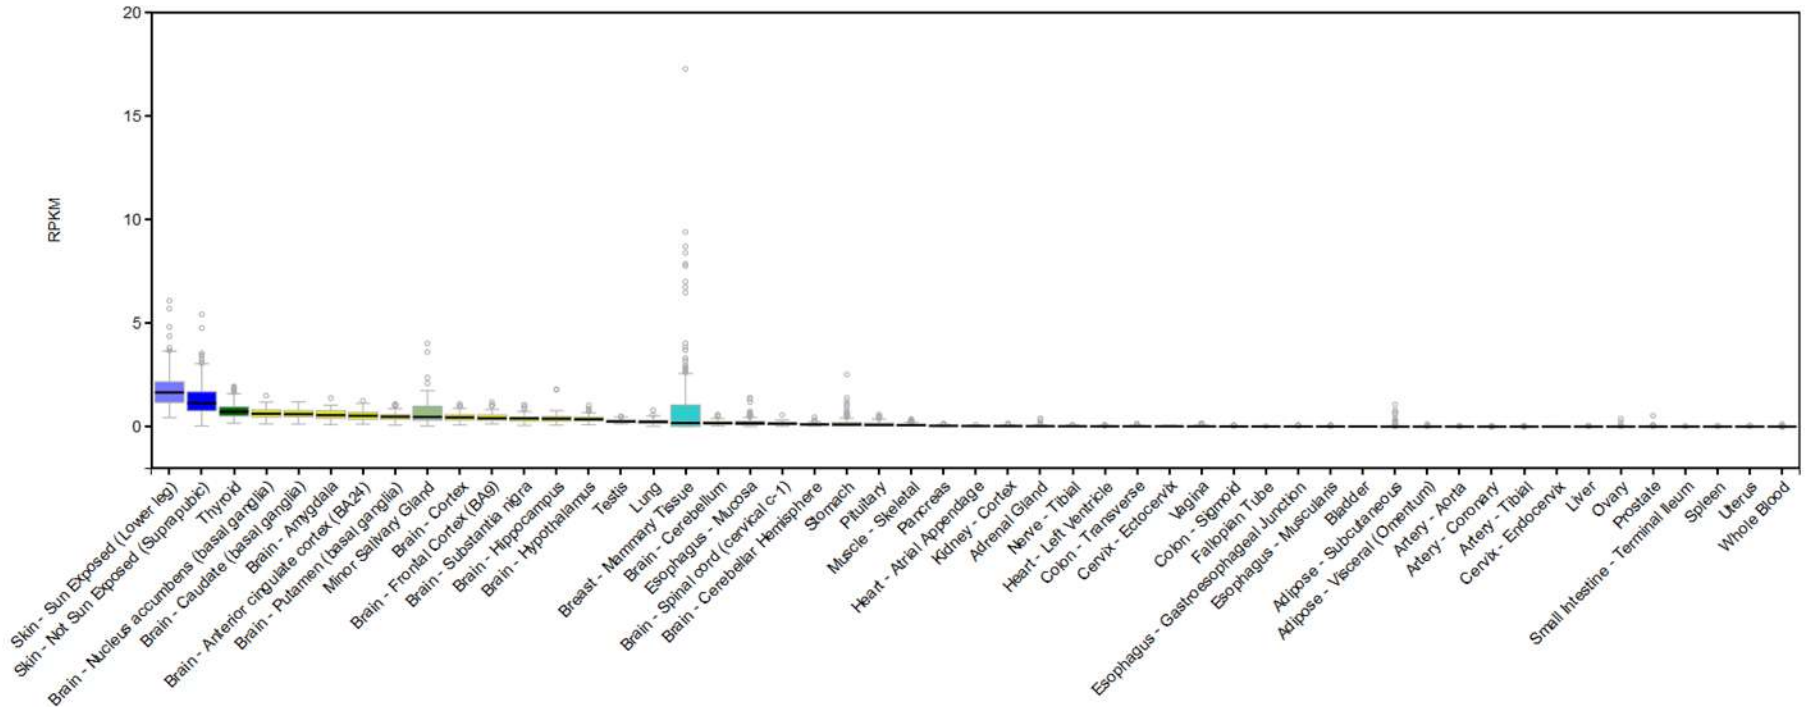

# ATP13A4

Median RPKM of highest tissue: 23.248

Plot:  Gene  Isoform

Differentiation:  None  Gender

Scale:  Log  Linear

Sort: ABC  ▲  ▼

Outliers:  On  Off

Display:  Boxes  Medians

Filter:  Tissue

ATP13A4 Gene Expression

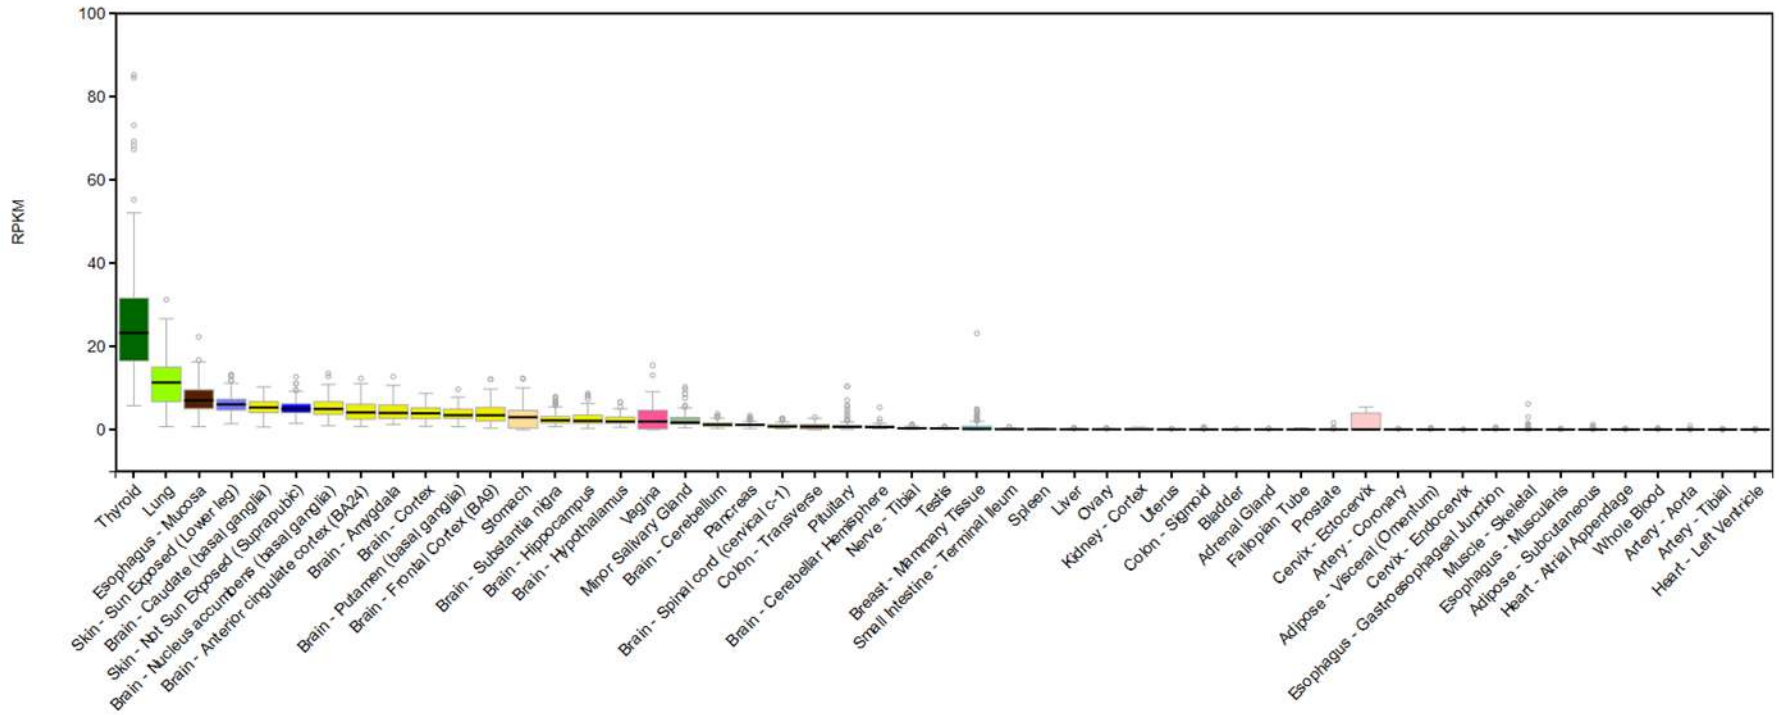

# PSMG3

Median RPKM of highest tissue: 22.559

Plot:      Differentiation:      Scale:      Sort:       Outliers:      Display:      Filter:

PSMG3 Gene Expression

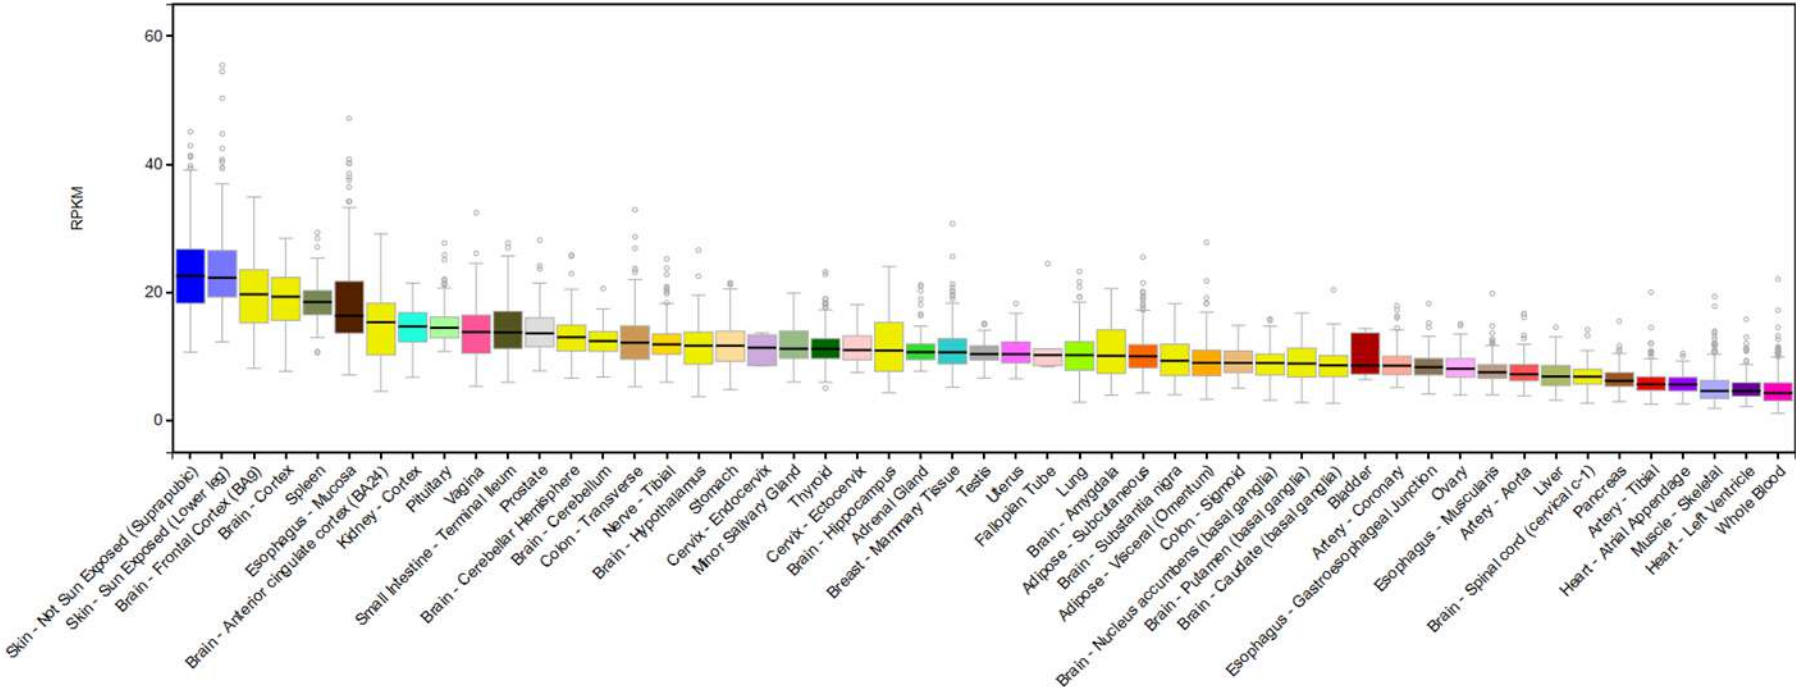

# IFT57

Median RPKM of highest tissue: 70.930

Plot:  Gene  Isoform

Differentiation:  None  Gender

Scale:  Log  Linear

Sort: ABC ▲ ▼

Outliers:  On  Off

Display:  Boxes  Medians

Filter:

IFT57 Gene Expression

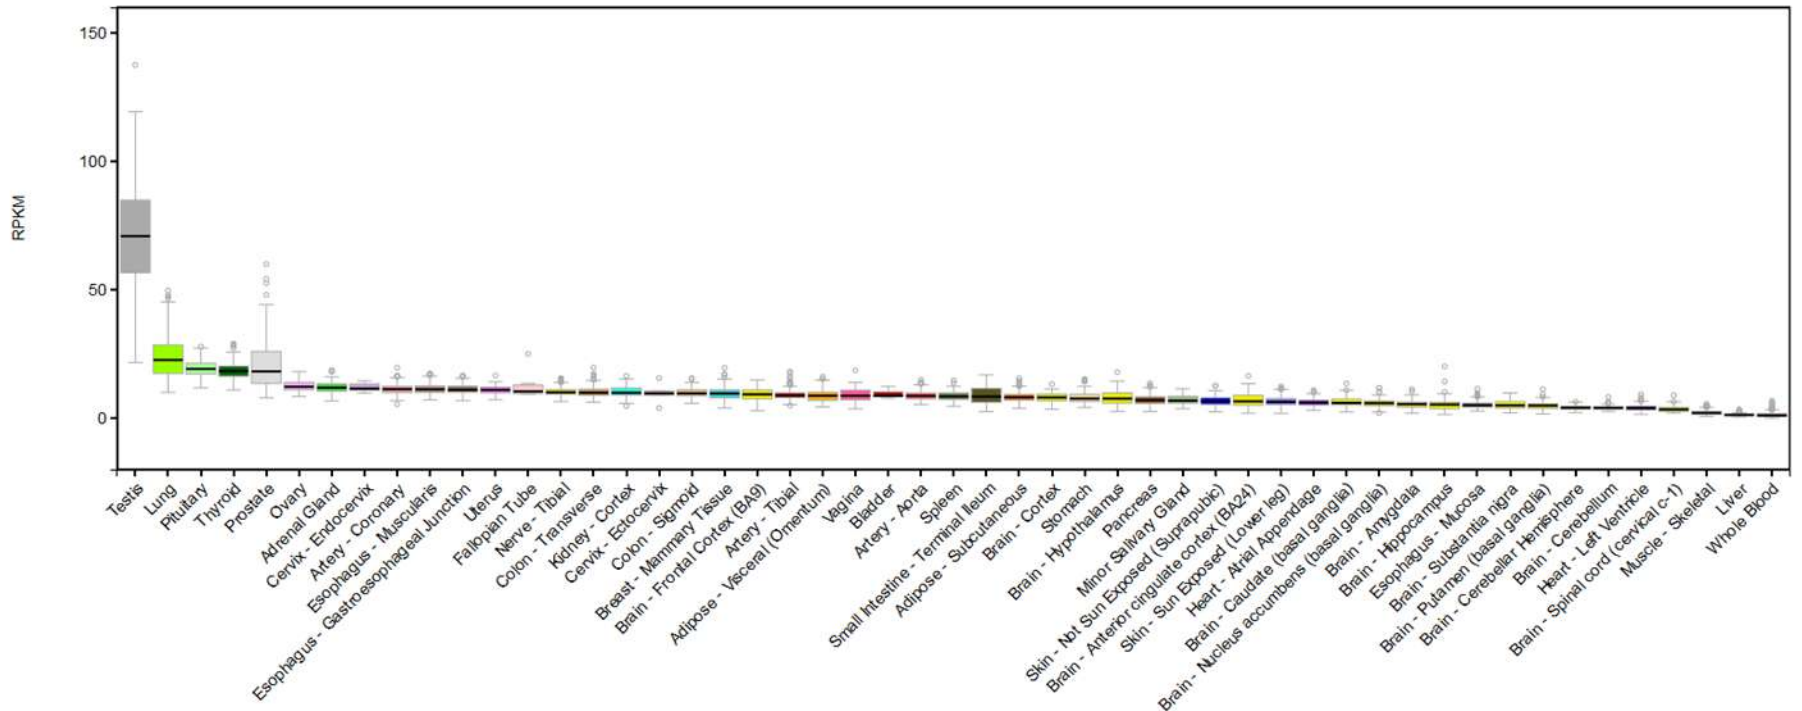



# BFAR

Median RPKM of highest tissue: 15.267

Plot:  Gene  Isoform

Differentiation:  None  Gender

Scale:  Log  Linear

Sort: ABC  ▲  ▼

Outliers:  On  Off

Display:  Boxes  Medians

Filter:

BFAR Gene Expression

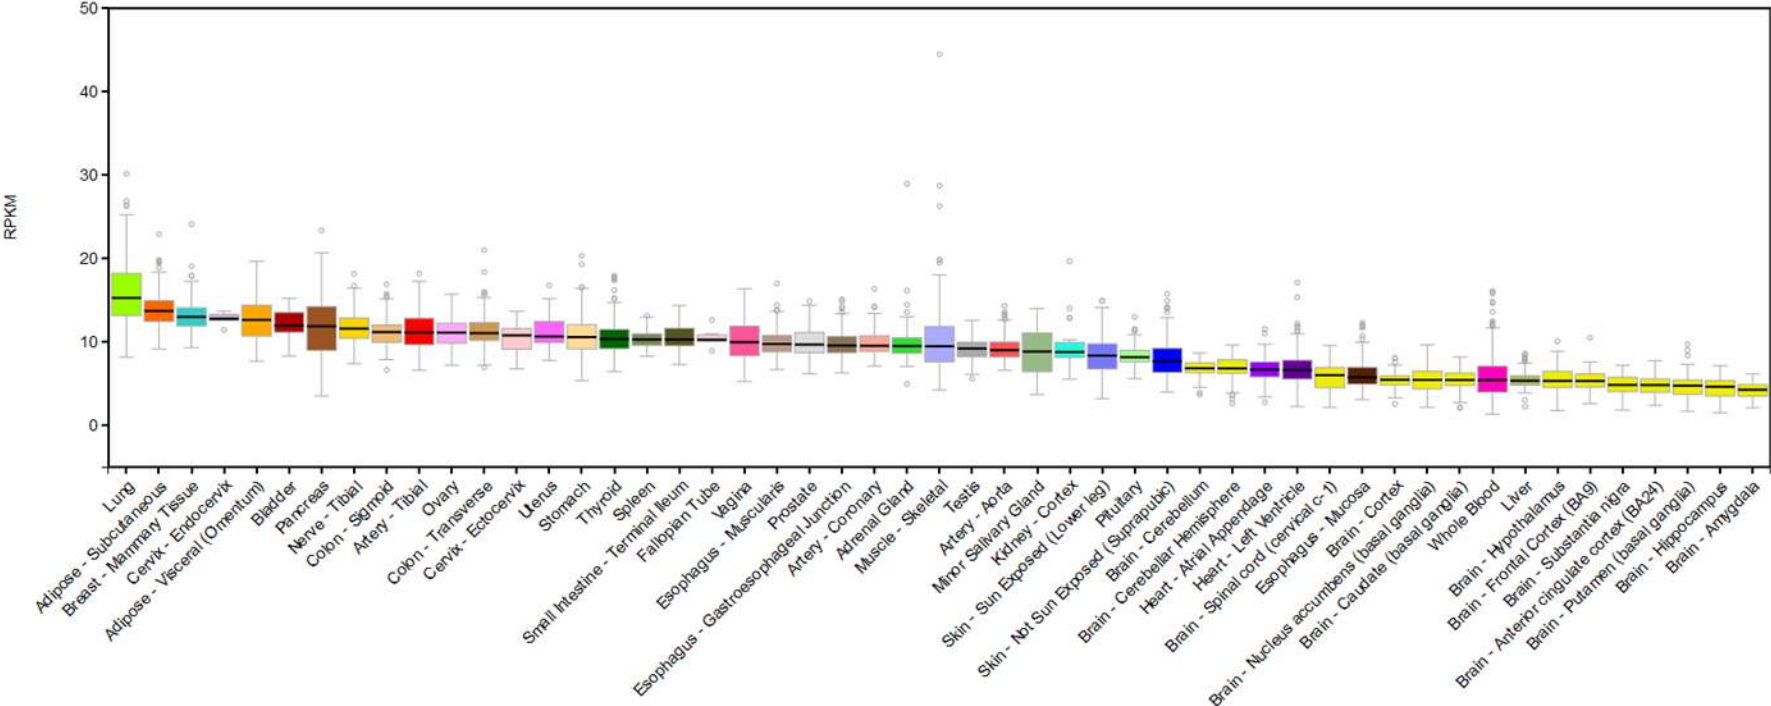

# IFT172

Median RPKM of highest tissue: 25.155

Plot:  Gene  Isoform

Differentiation:  None  Gender

Scale:  Log  Linear

Sort: ABC ▲ ▼

Outliers:  On  Off

Display:  Boxes  Medians

Filter:  Tissue

IFT172 Gene Expression

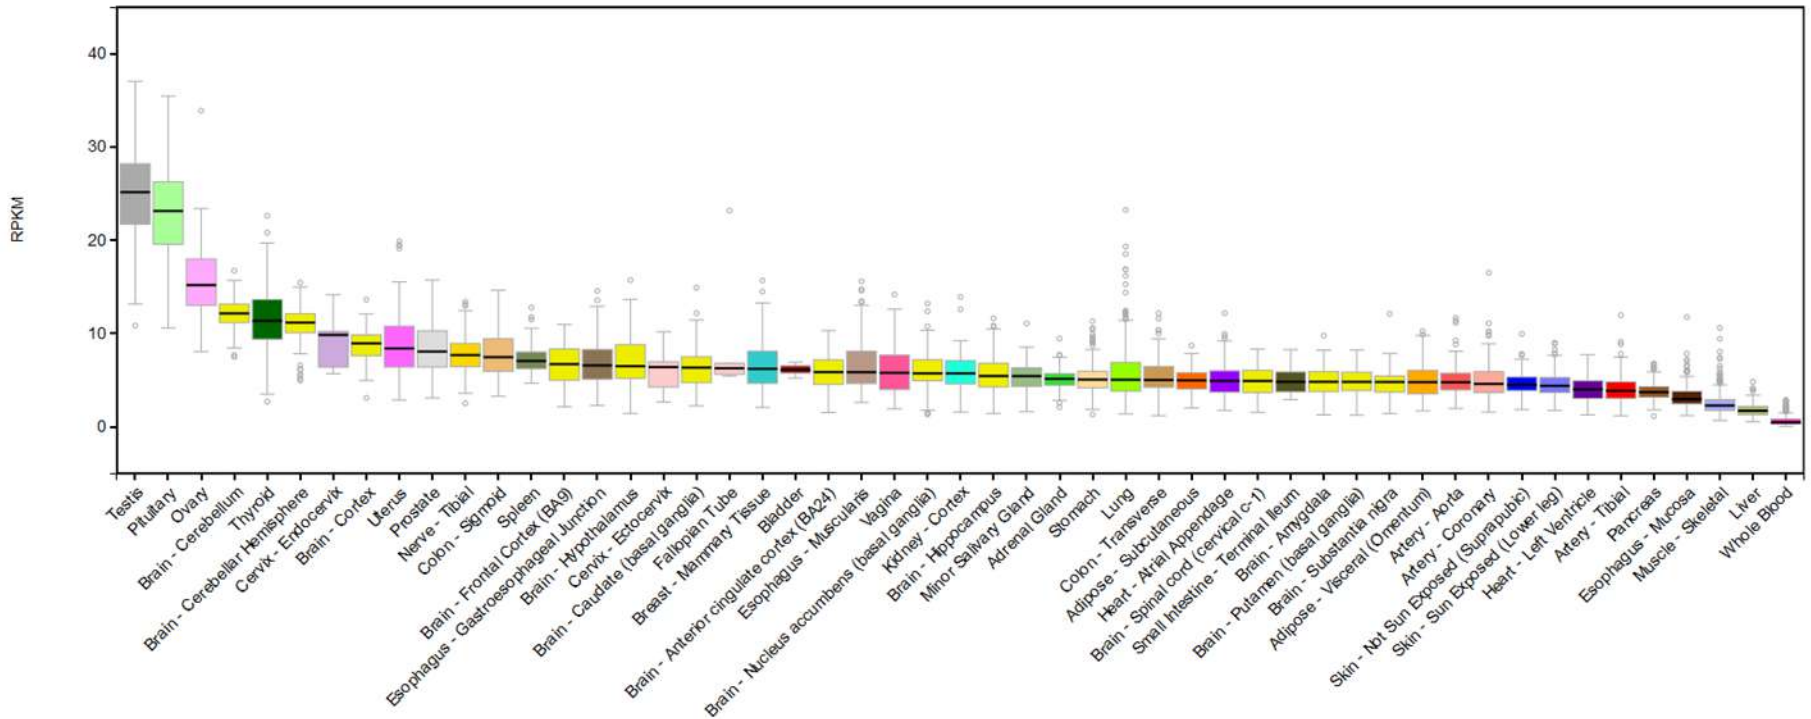



# KLK10

Median RPKM of highest tissue: 101.490

Ovary: 6.363

Plot:      Differentiation:      Scale:      Sort:       Outliers:      Display:      Filter:

KLK10 Gene Expression

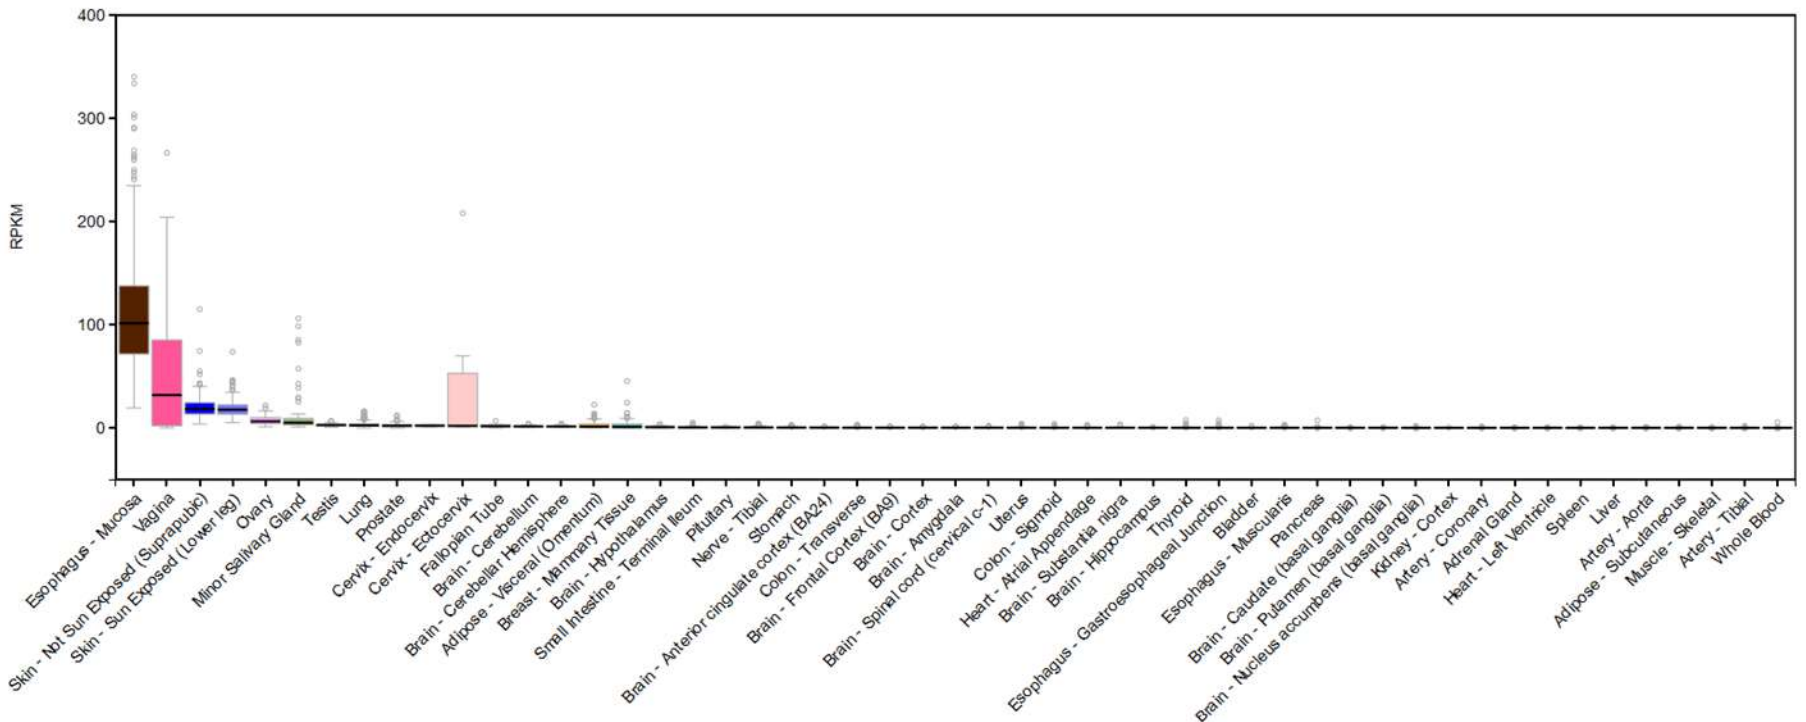

# CXCL13

Median RPKM of highest tissue: 273.283

Prostate: 1.622

Plot:  Gene  Isoform

Differentiation:  None  Gender

Scale:  Log  Linear

Sort: ABC  ▲  ▼

Outliers:  On  Off

Display:  Boxes  Medians

Filter:

CXCL13 Gene Expression

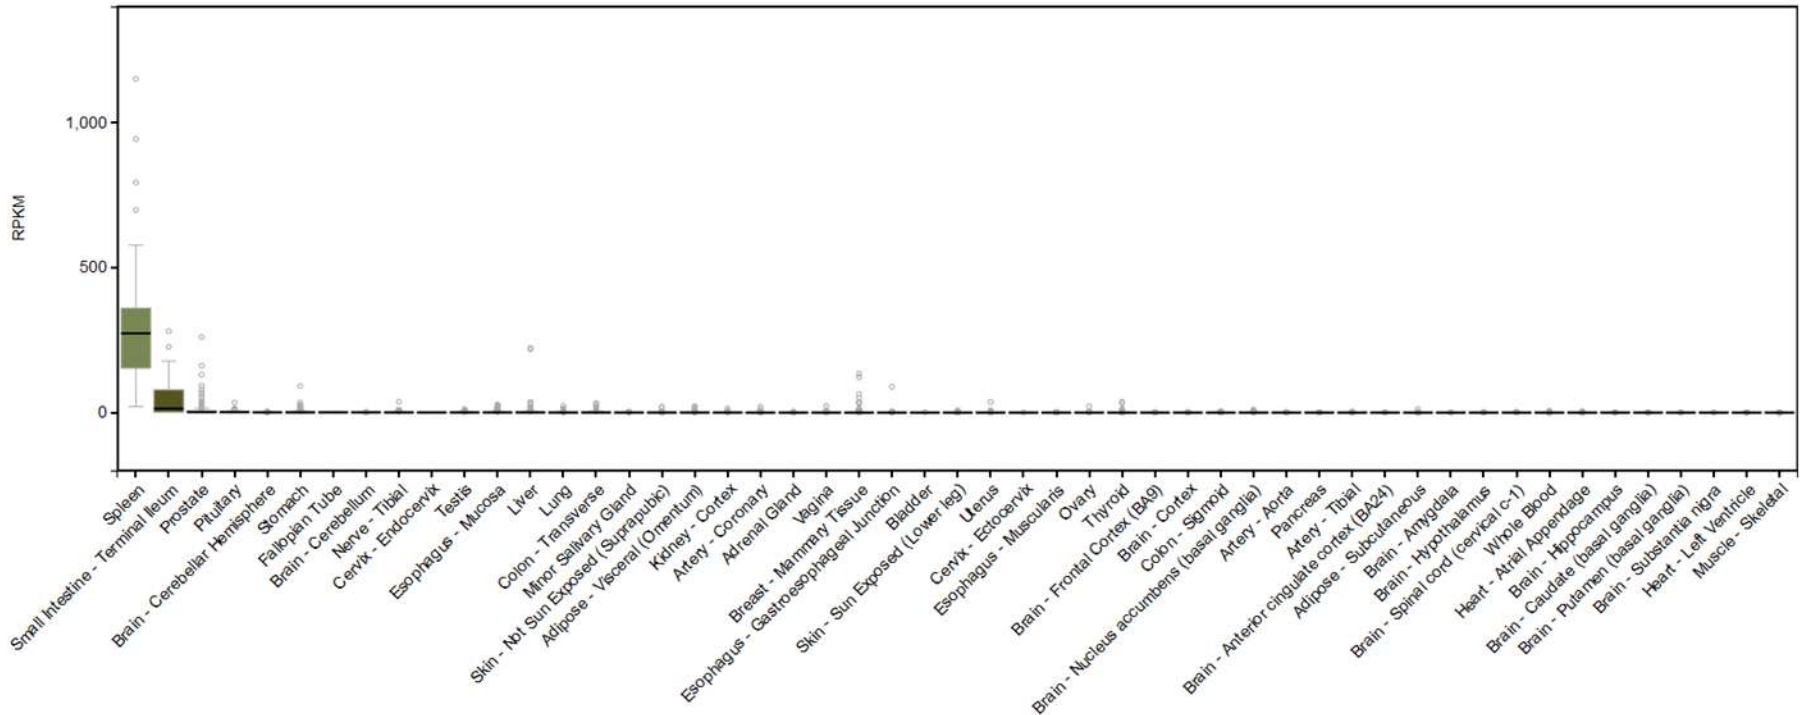

# GIGYF1

Median RPKM of highest tissue: 46.852

Plot:  Gene  Isoform

Differentiation:  None  Gender

Scale:  Log  Linear

Sort: ABC ▲ ▼

Outliers:  On  Off

Display:  Boxes  Medians

Filter:  Tissue

GIGYF1 Gene Expression

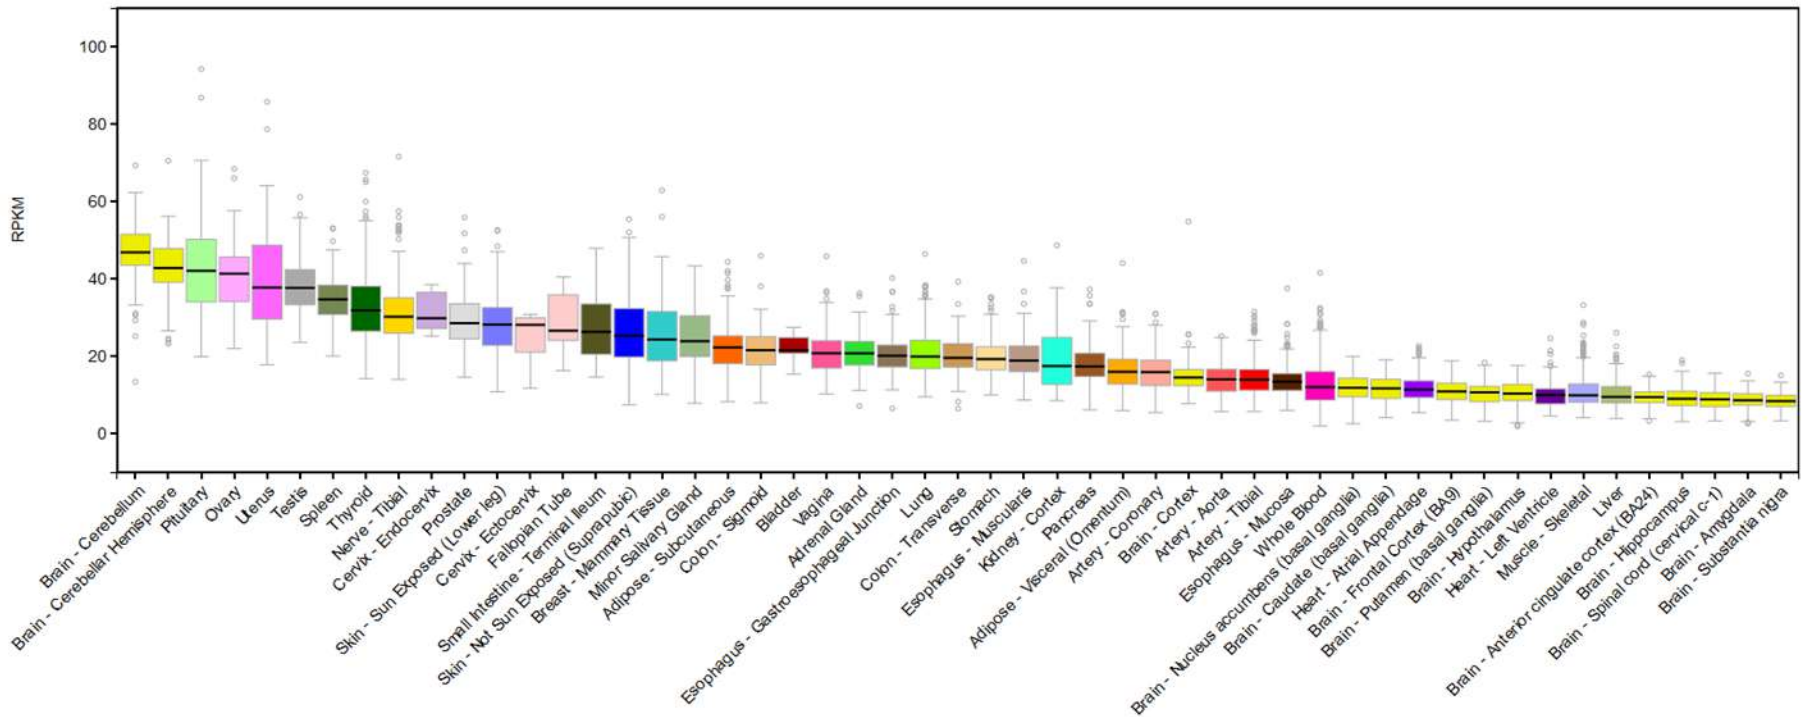

# DMD

Median RPKM of highest tissue: 15.863

Plot:  Gene  Isoform

Differentiation:  None  Gender

Scale:  Log  Linear

Sort: ABC  ▲  ▼

Outliers:  On  Off

Display:  Boxes  Medians

Filter:  Tissue

DMD Gene Expression

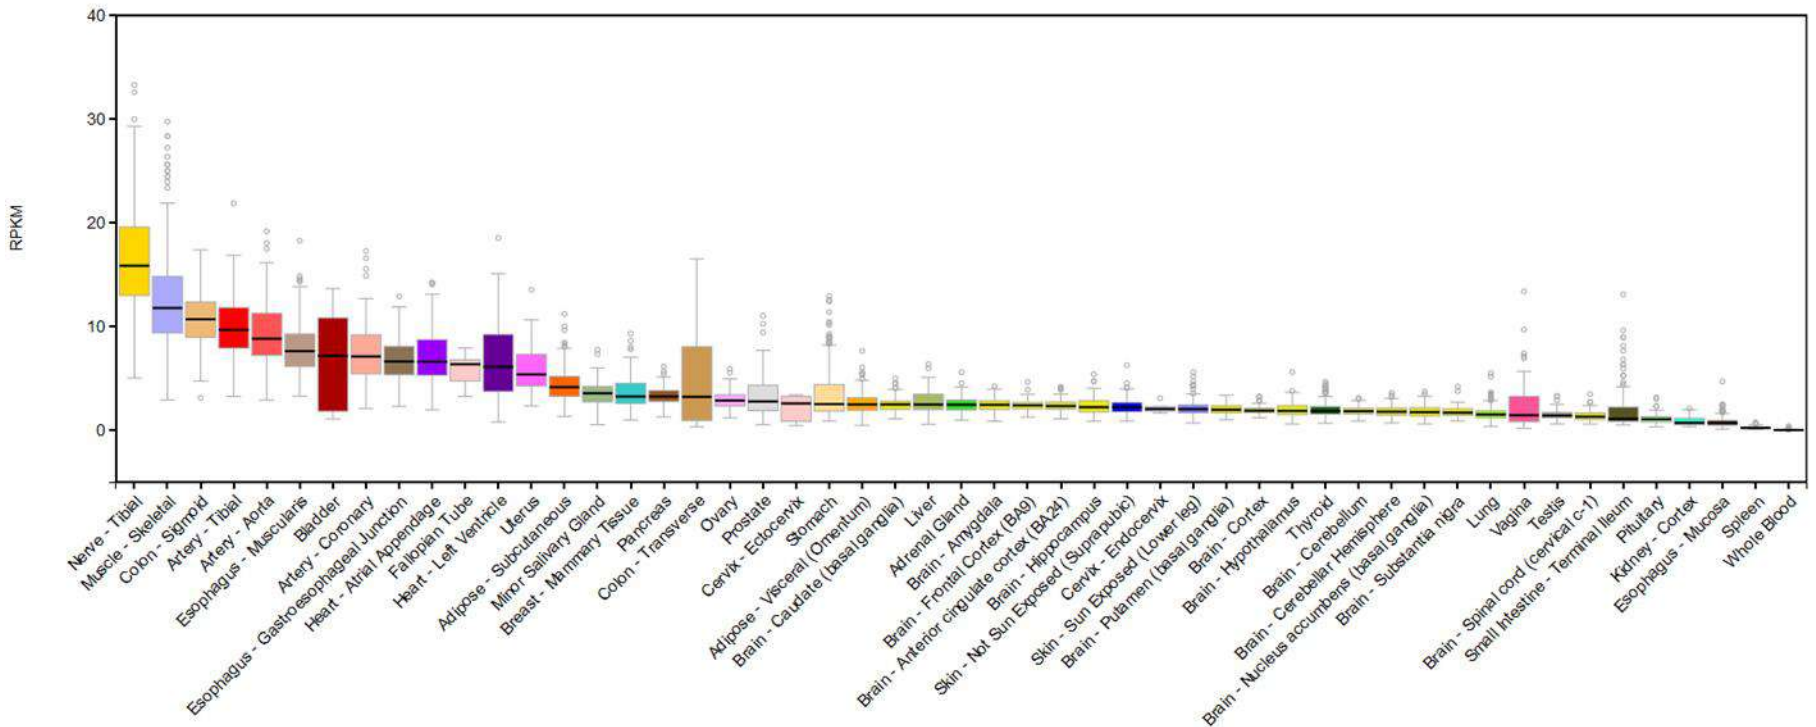

# P4HA1

Median RPKM of highest tissue: 28.095

Fallopian tube: 10.683

Plot:      Differentiation:      Scale:      Sort: ABC ▲ ▼    Outliers:      Display:      Filter:

P4HA1 Gene Expression

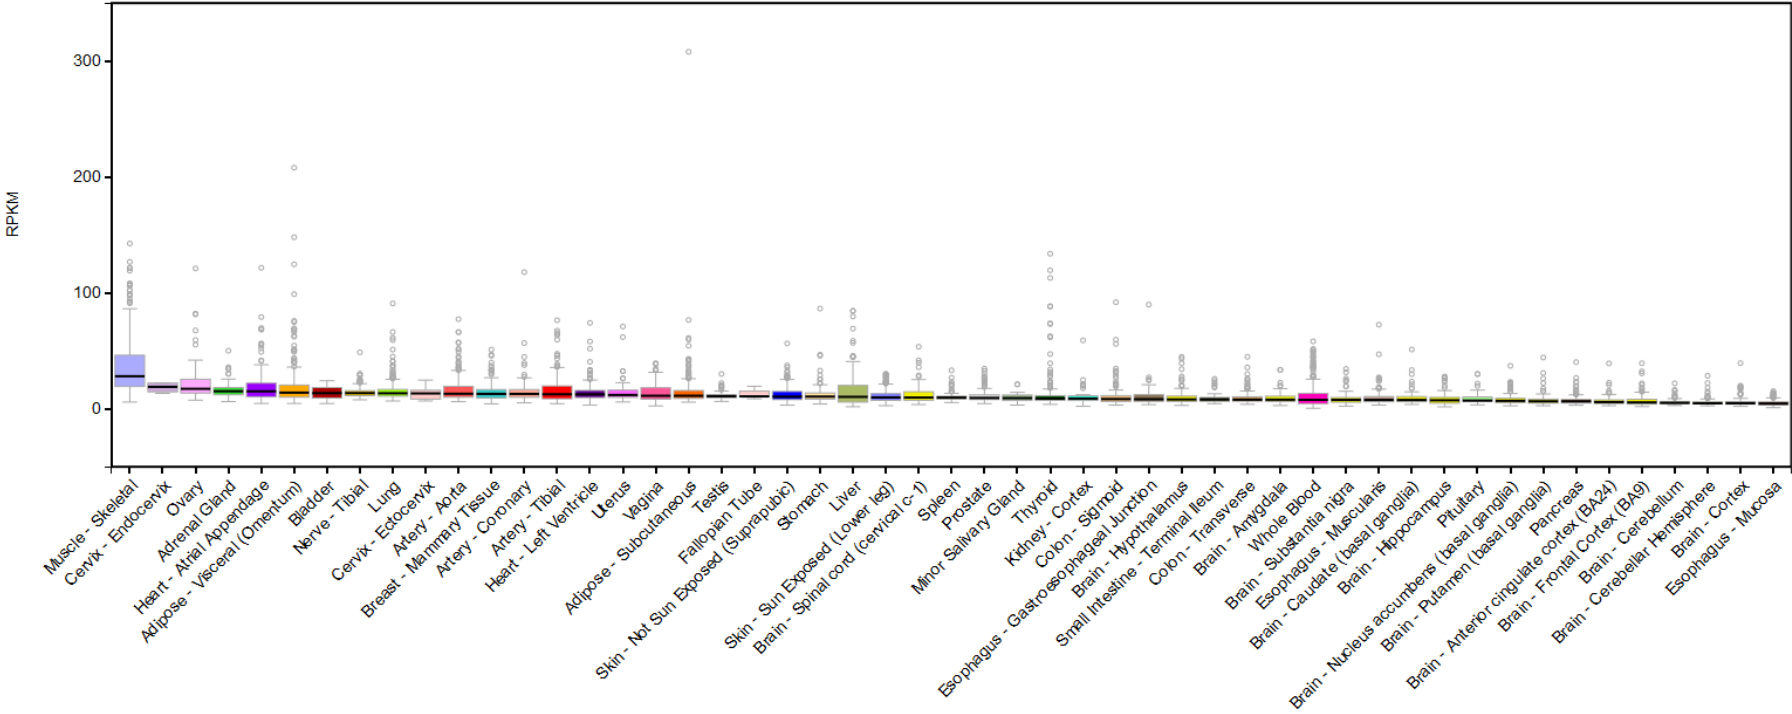

# BCAT1

Median RPKM of highest tissue: 13.220

Plot:  Gene  Isoform

Differentiation:  None  Gender

Scale:  Log  Linear

Sort: ABC  ▲  ▼

Outliers:  On  Off

Display:  Boxes  Medians

Filter:  Tissue

BCAT1 Gene Expression

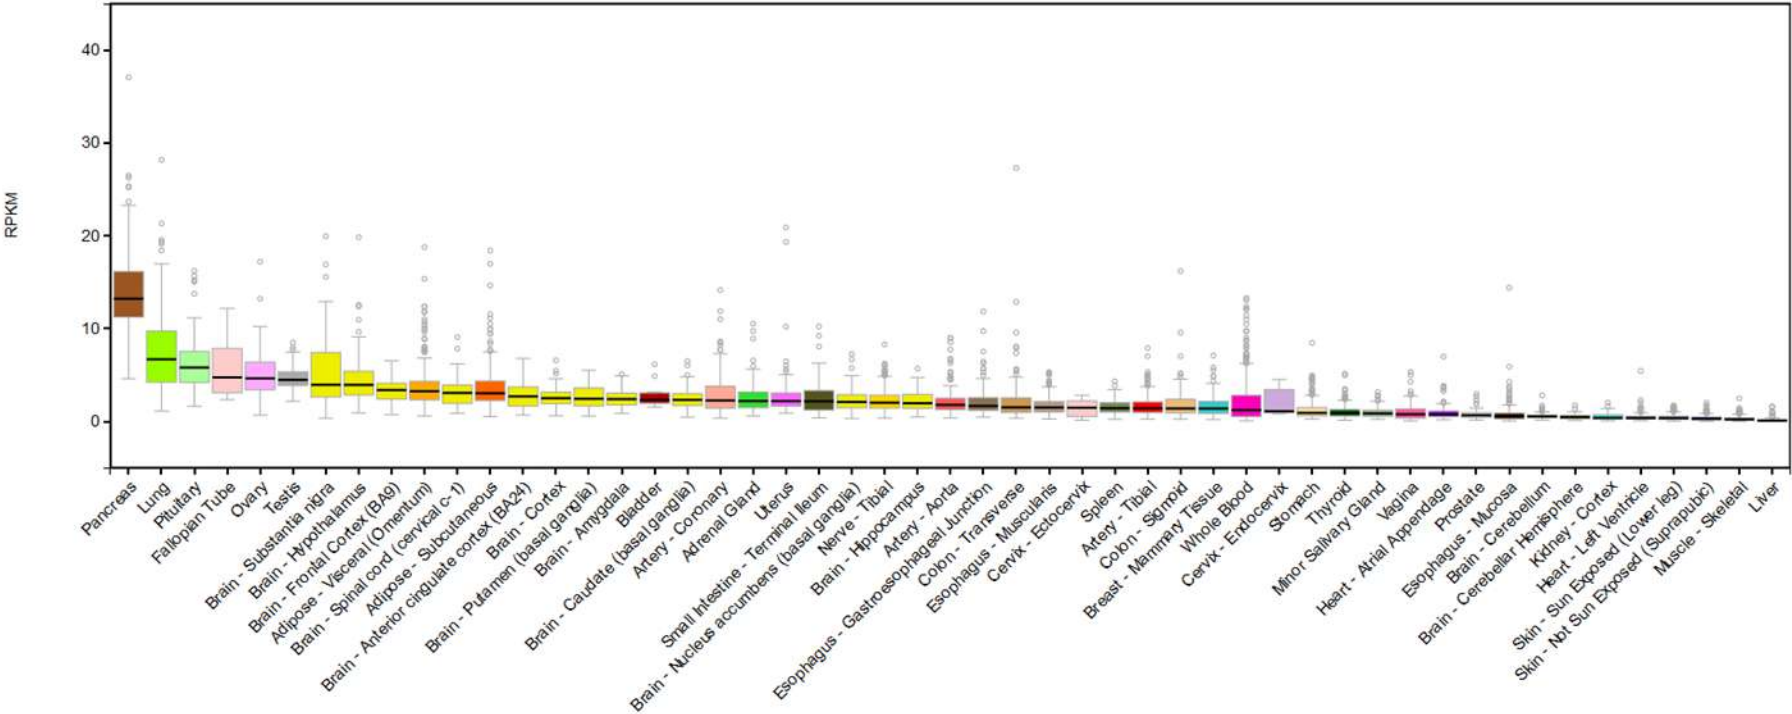



# UBXN1

Median RPKM of highest tissue: 107.734

Plot: Gene Isoform | Differentiation: None Gender | Scale: Log Linear | Sort: ABC ▲ ▼ | Outliers: On Off | Display: Boxes Medians | Filter: Tissue

UBXN1 Gene Expression

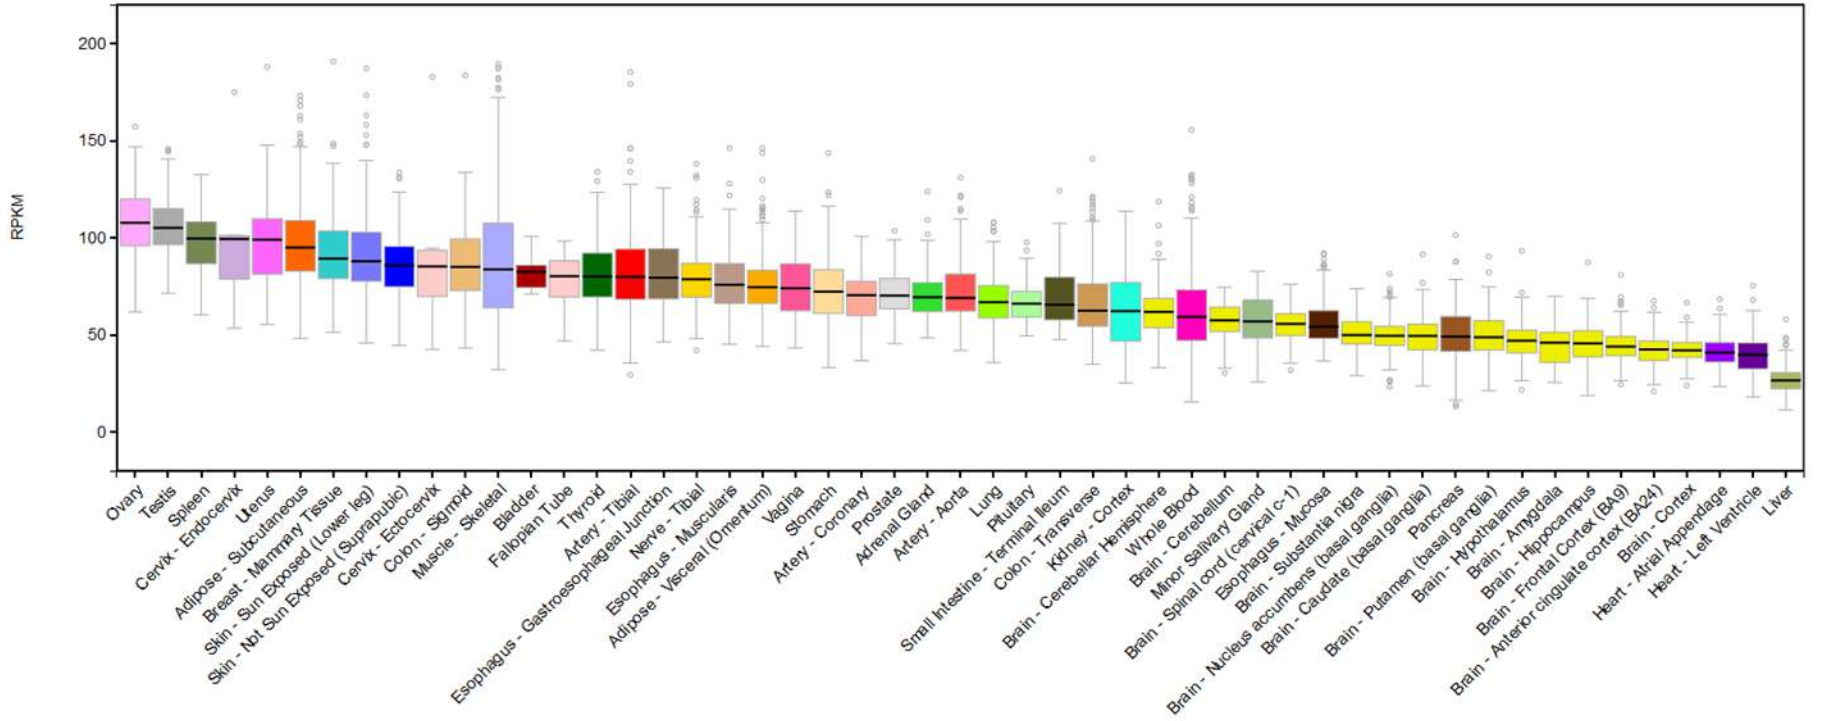

# PEG10

Median RPKM of highest tissue: 139.371

Lung: 6.457

Plot:  Gene  Isoform

Differentiation:  None  Gender

Scale:  Log  Linear

Sort: ABC ▲ ▼

Outliers:  On  Off

Display:  Boxes  Medians

Filter:  Tissue

PEG10 Gene Expression

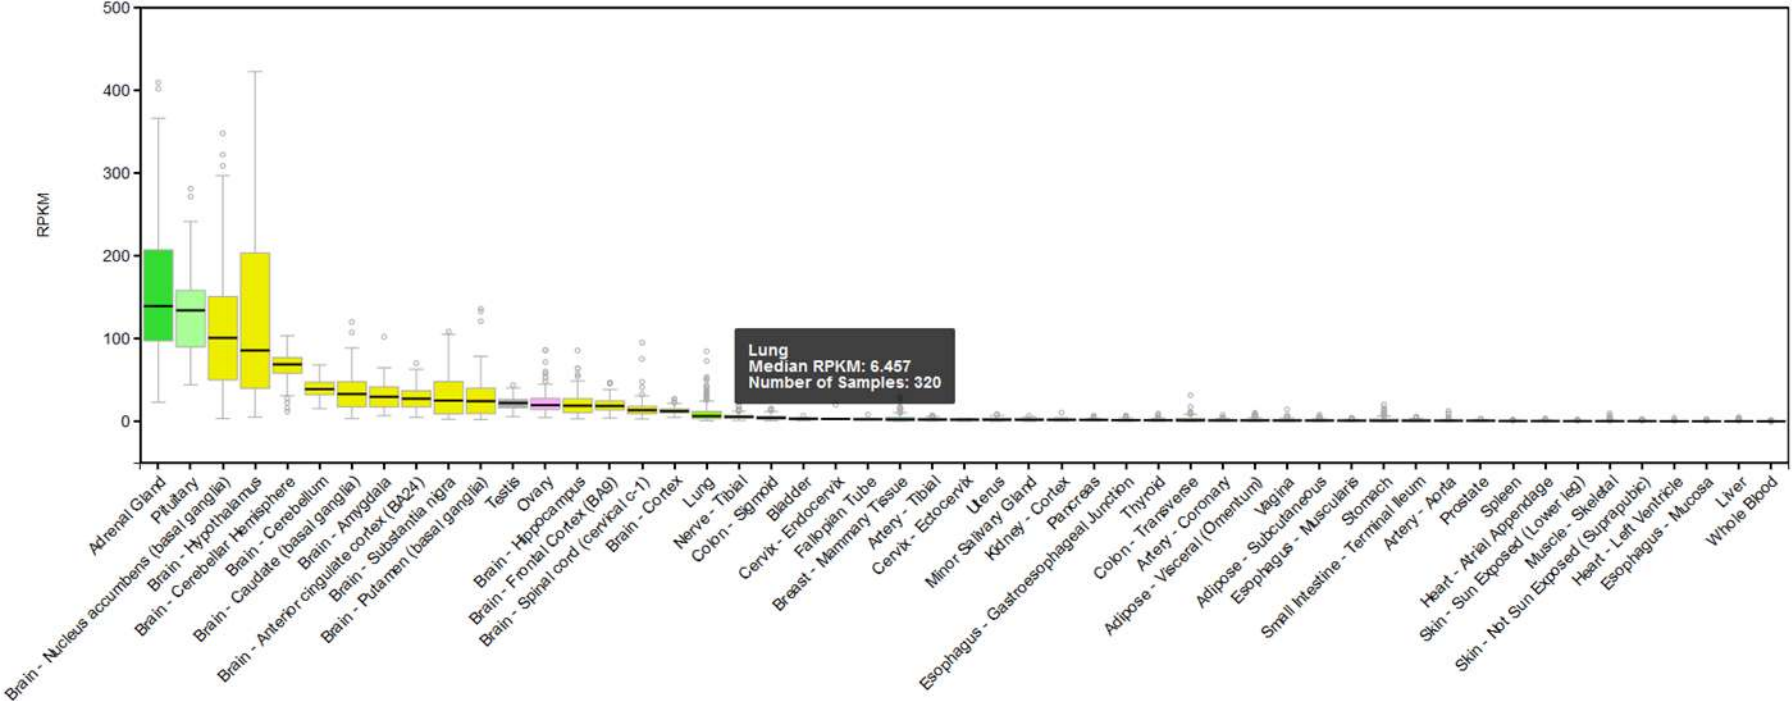

# MFN1

Median RPKM: 11.854

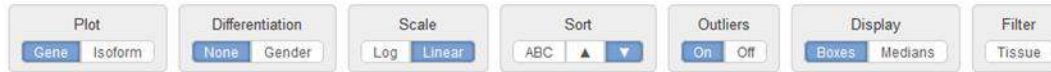

MFN1 Gene Expression

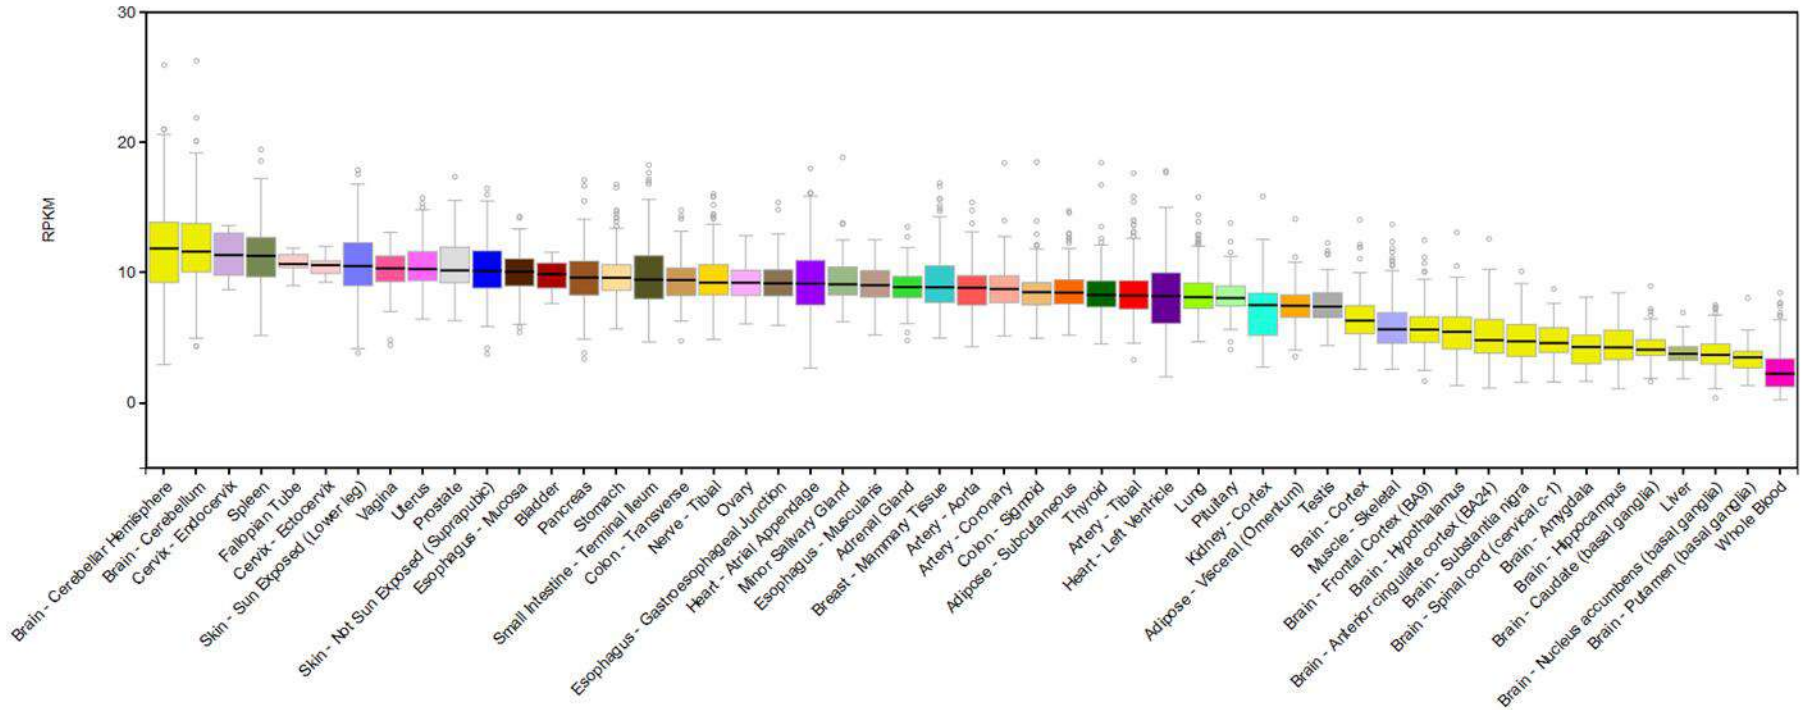

# SULF1

Median RPKM: 58.499

Plot:  Gene  Isoform

Differentiation:  None  Gender

Scale:  Log  Linear

Sort: ABC ▲ ▼

Outliers:  On  Off

Display:  Boxes  Medians

Filter:

SULF1 Gene Expression

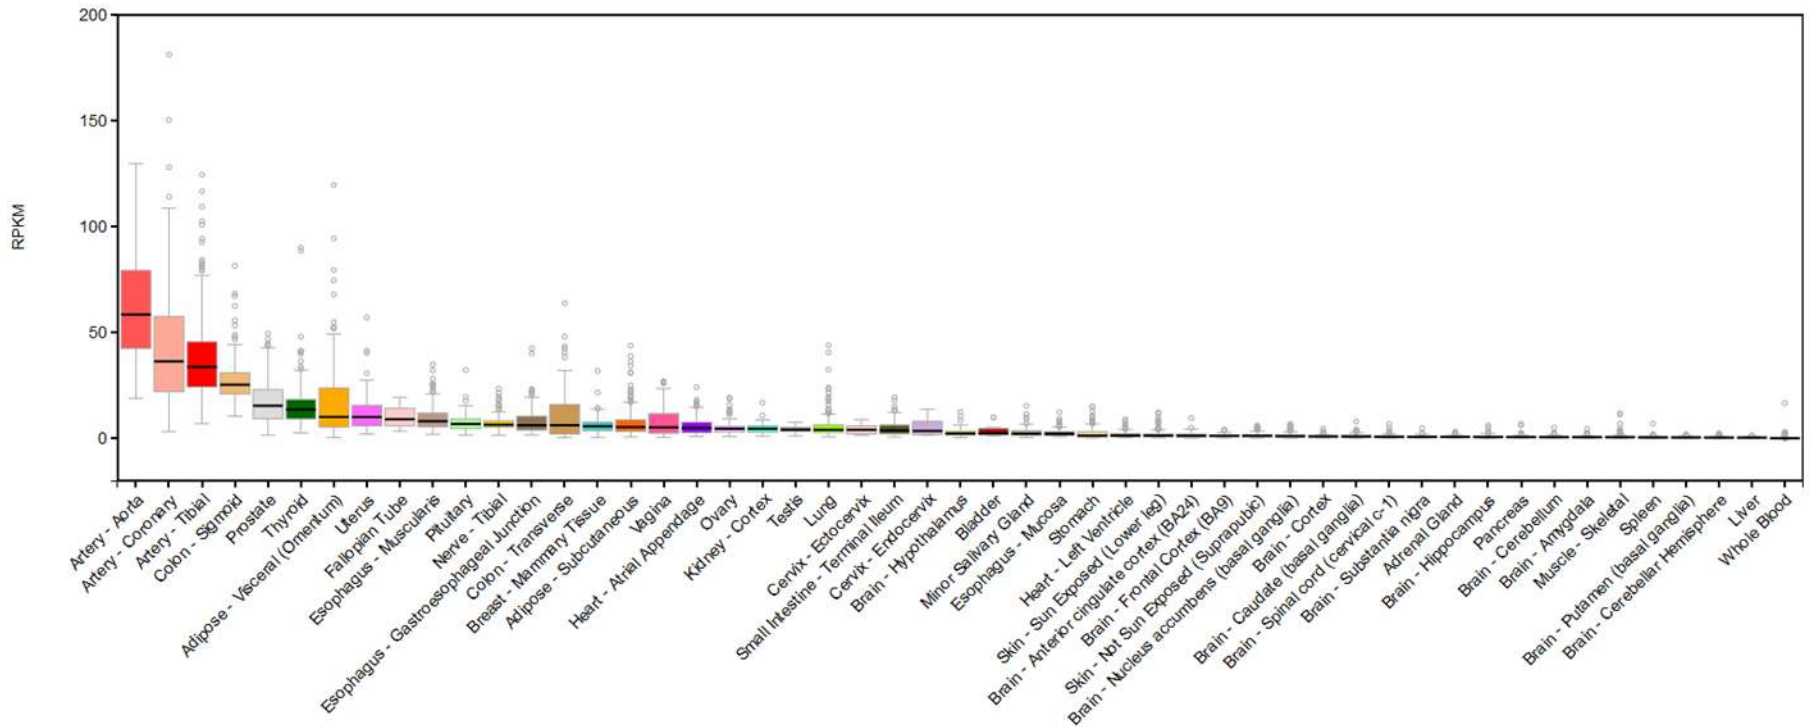

# GOLGA1

Median RPKM: 17.008

Plot:  Gene  Isoform

Differentiation:  None  Gender

Scale:  Log  Linear

Sort: ABC ▲ ▼

Outliers:  On  Off

Display:  Boxes  Medians

Filter:  Tissue

GOLGA1 Gene Expression

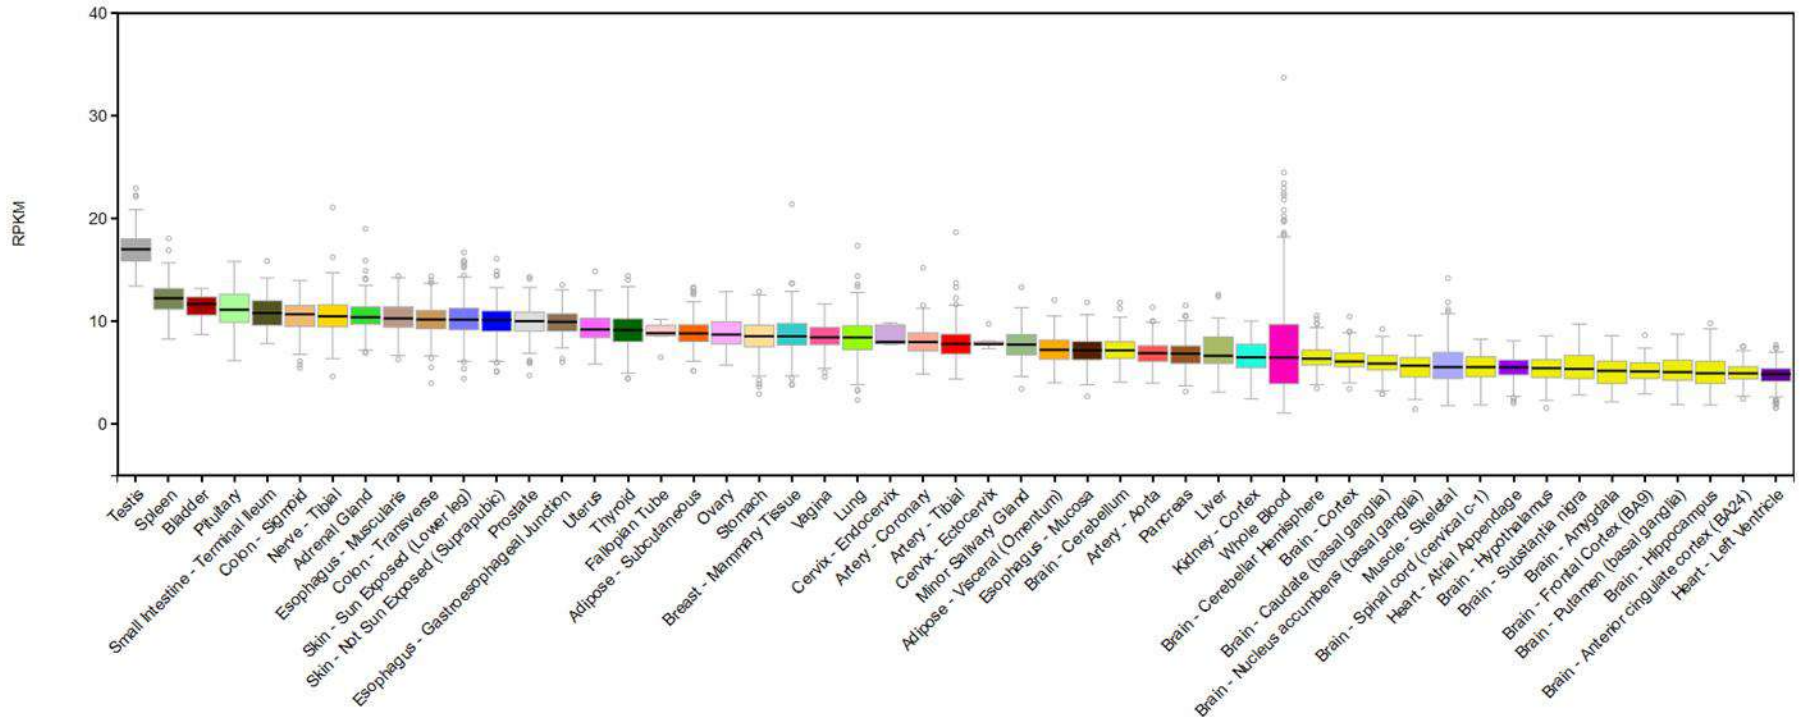

# ABHD1

Median RPKM of highest tissue: 67.923

Plot:  Gene  Isoform

Differentiation:  None  Gender

Scale:  Log  Linear

Sort: ABC  ▲  ▼

Outliers:  On  Off

Display:  Boxes  Medians

Filter:  Tissue

ABHD1 Gene Expression

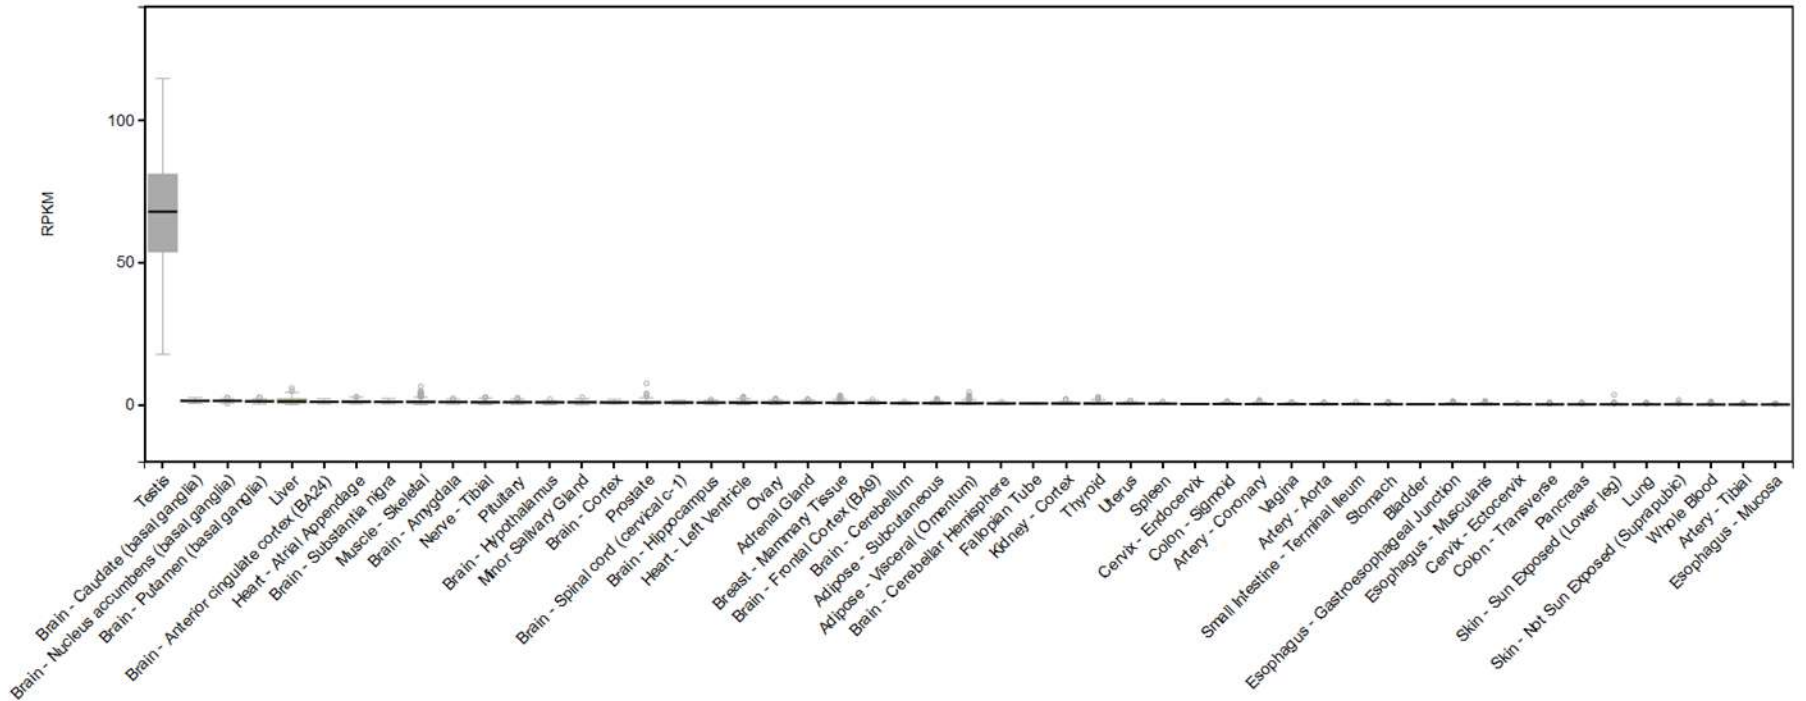



# SPON1

Median RPKM of highest tissue: 38.993

Plot:  Gene  Isoform

Differentiation:  None  Gender

Scale:  Log  Linear

Sort: ABC  ▲  ▼

Outliers:  On  Off

Display:  Boxes  Medians

Filter:

SPON1 Gene Expression

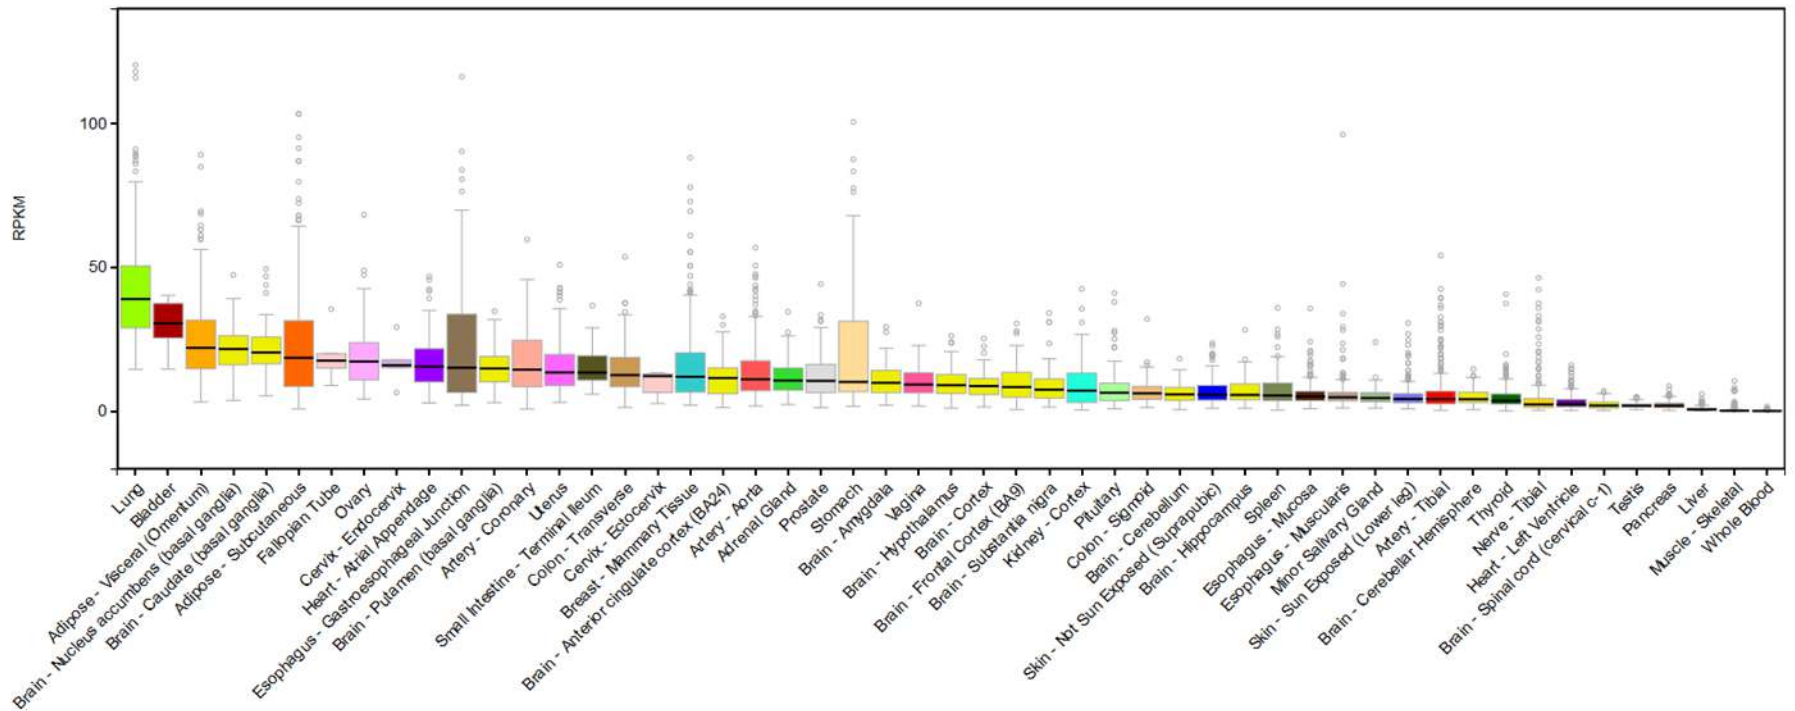

# SETD8

Median RPKM of highest tissue: 24.394

Plot:  Gene  Isoform

Differentiation:  None  Gender

Scale:  Log  Linear

Sort: ABC  ▲  ▼

Outliers:  On  Off

Display:  Boxes  Medians

Filter:  Tissue

SETD8 Gene Expression

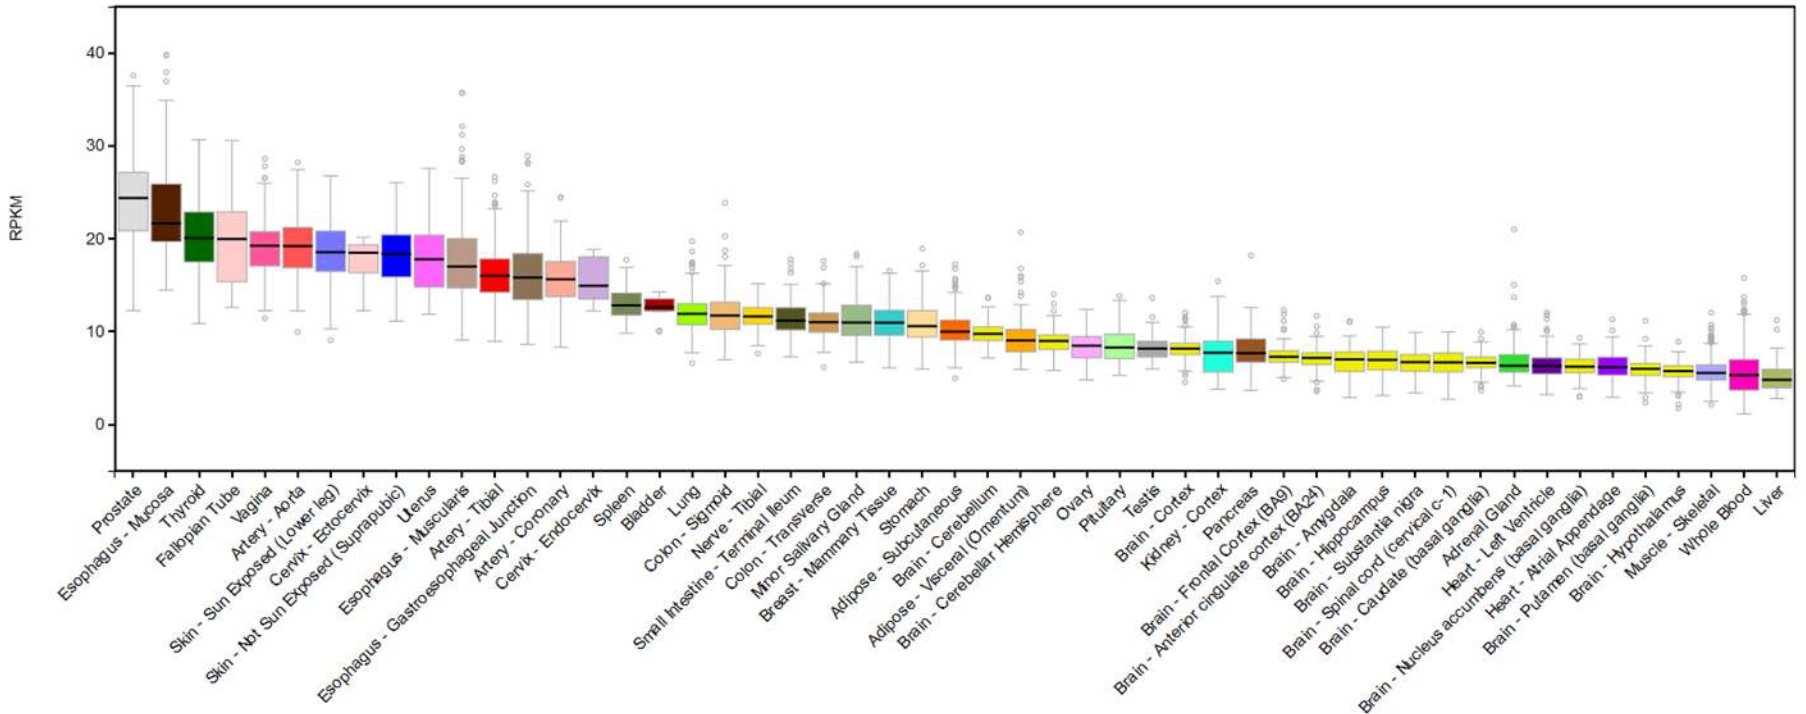

# NLRP2

Median RPKM of highest tissue: 9.963

Plot:      Differentiation:      Scale:      Sort:       Outliers:      Display:      Filter:

NLRP2 Gene Expression

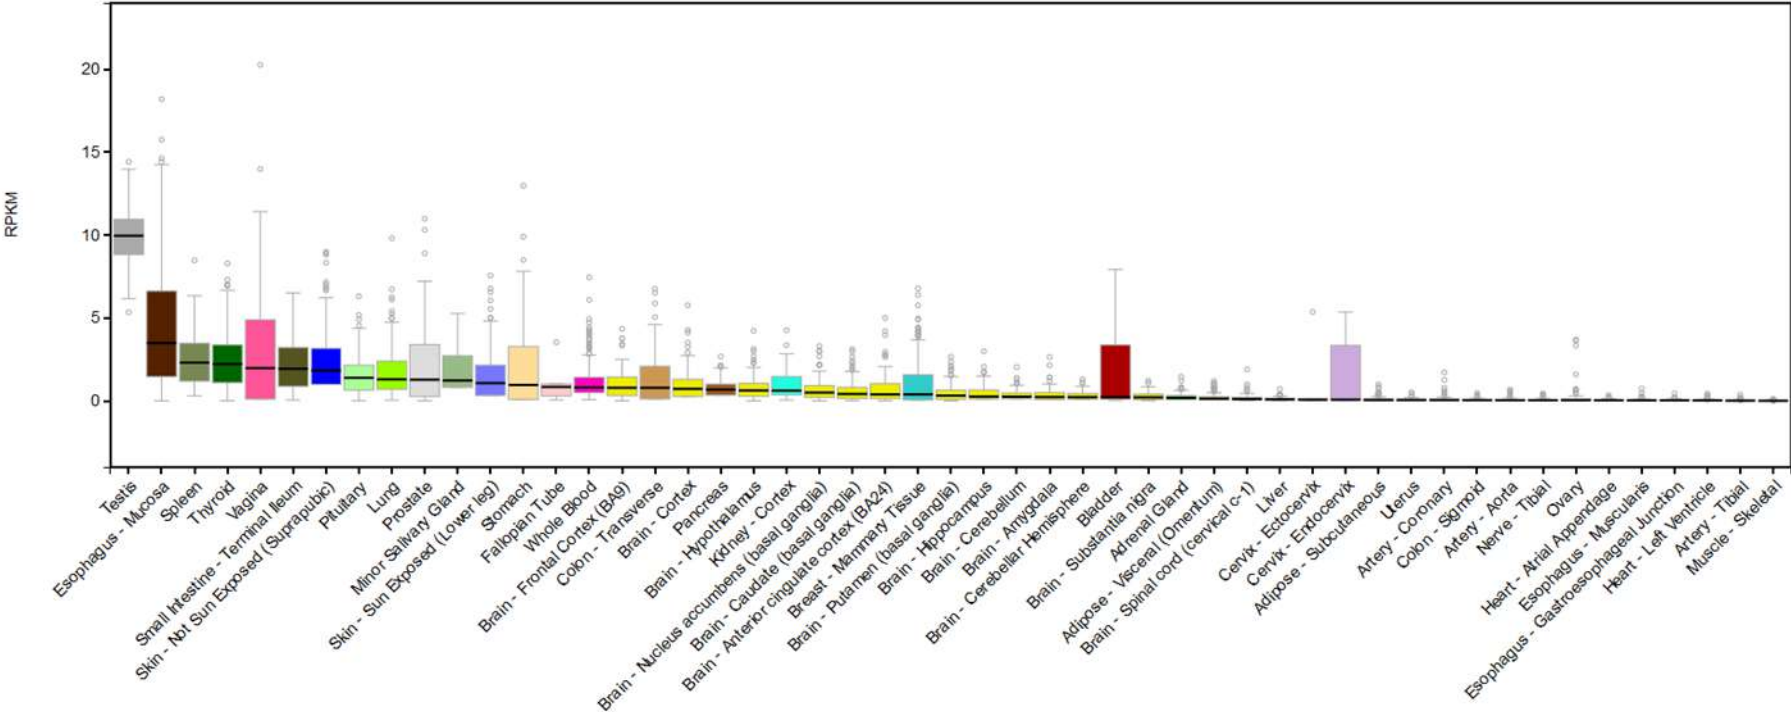

# DDIT4

Median RPKM of highest tissue: 550.743

Plot:  Gene  Isoform

Differentiation:  None  Gender

Scale:  Log  Linear

Sort: ABC ▲ ▼

Outliers:  On  Off

Display:  Boxes  Medians

Filter:  Tissue

DDIT4 Gene Expression

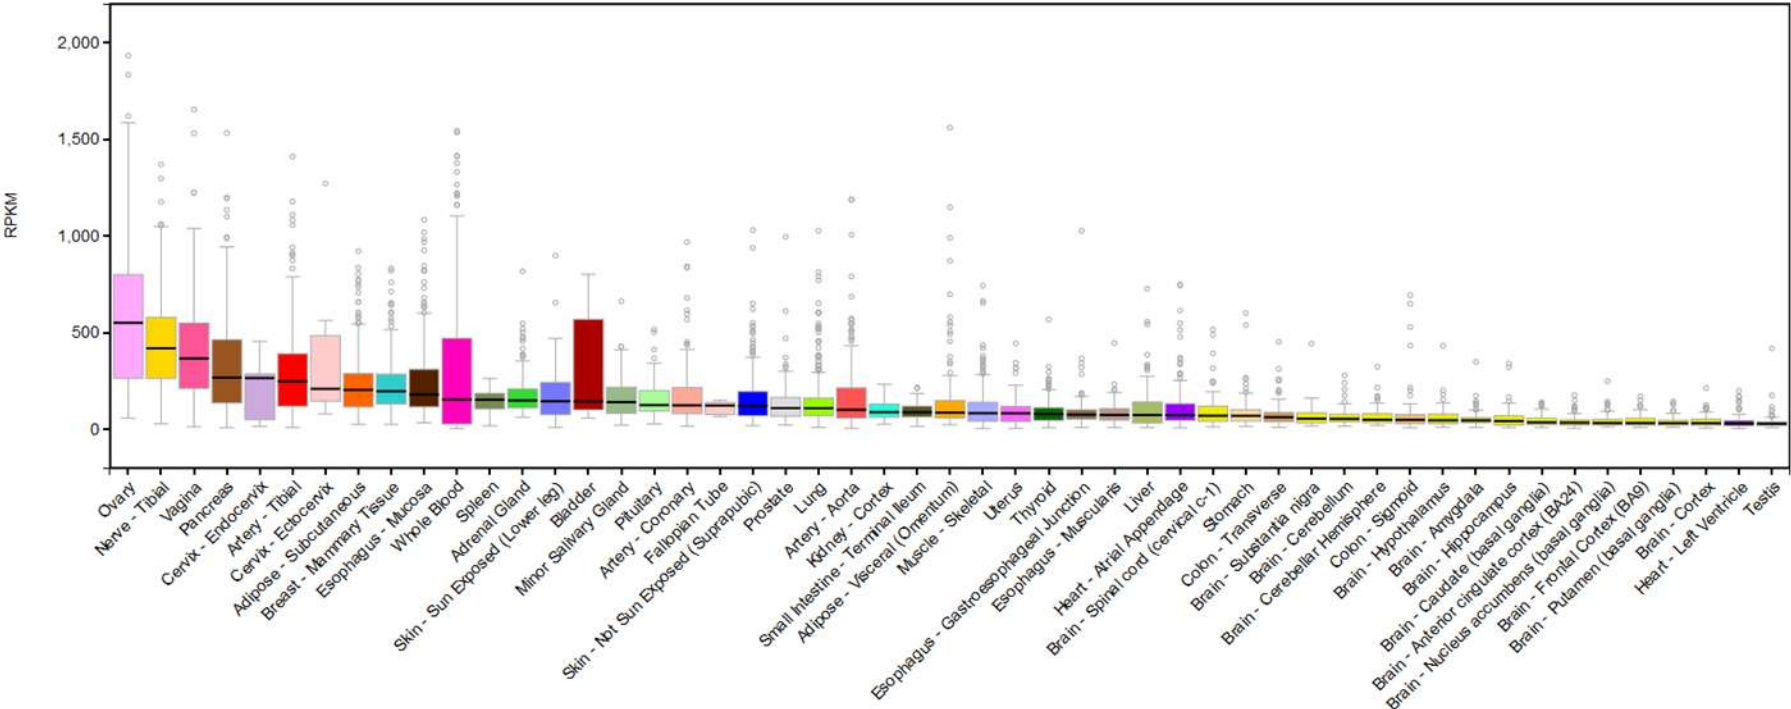

# PTTG2

Median RPKM of highest tissue: 0.800

Plot:      Differentiation:      Scale:      Sort:       Outliers:      Display:      Filter:

PTTG2 Gene Expression

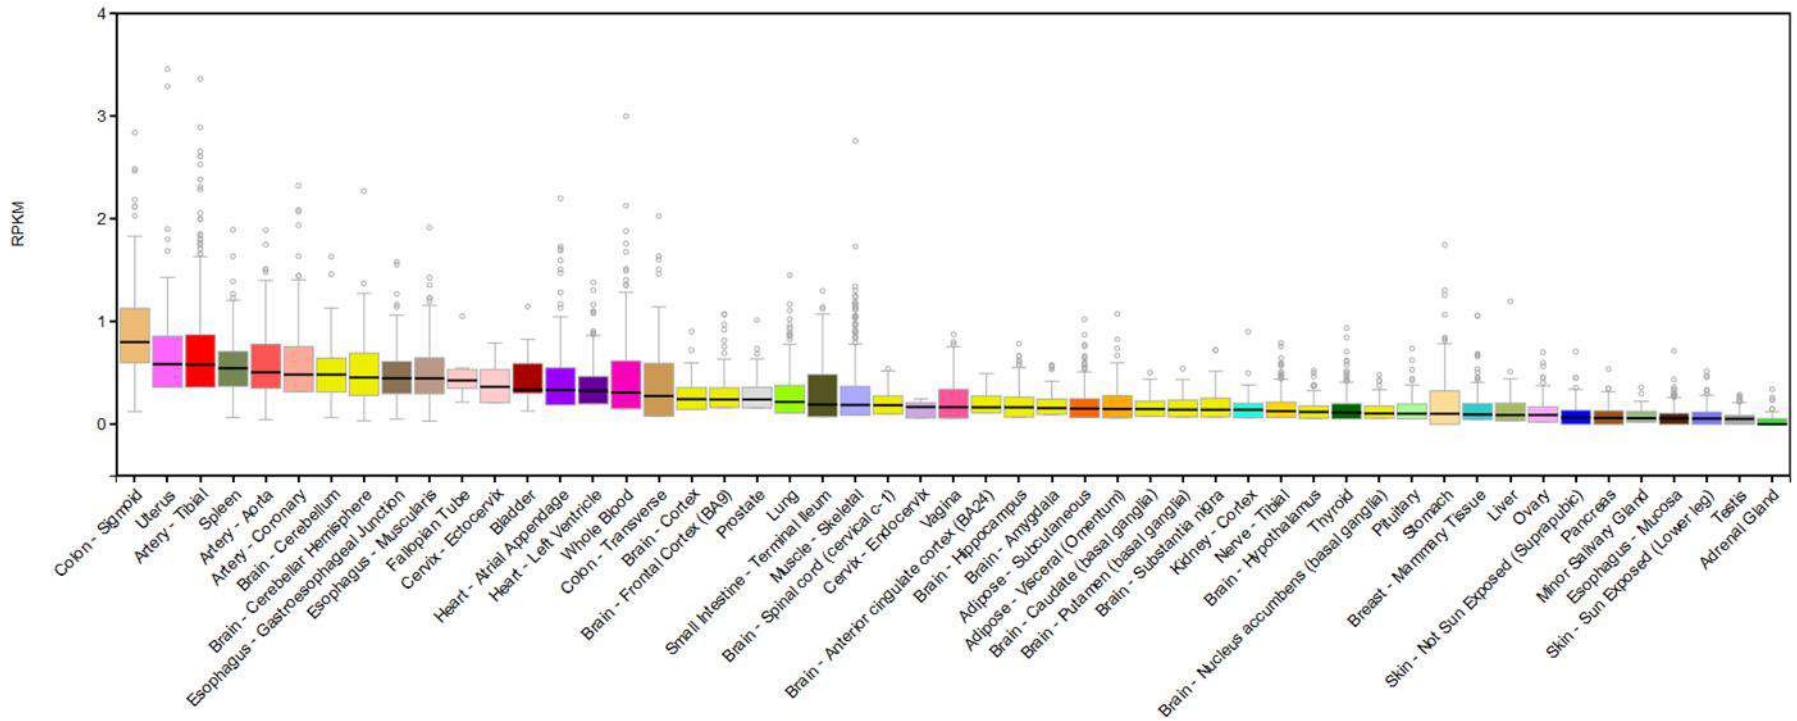



# PTGFRN

Median RPKM of highest tissue: 34.478

Plot:  Gene  Isoform  
Differentiation:  None  Gender  
Scale:  Log  Linear  
Sort: ABC  ▲  ▼  
Outliers:  On  Off  
Display:  Boxes  Medians  
Filter:  Tissue

PTGFRN Gene Expression

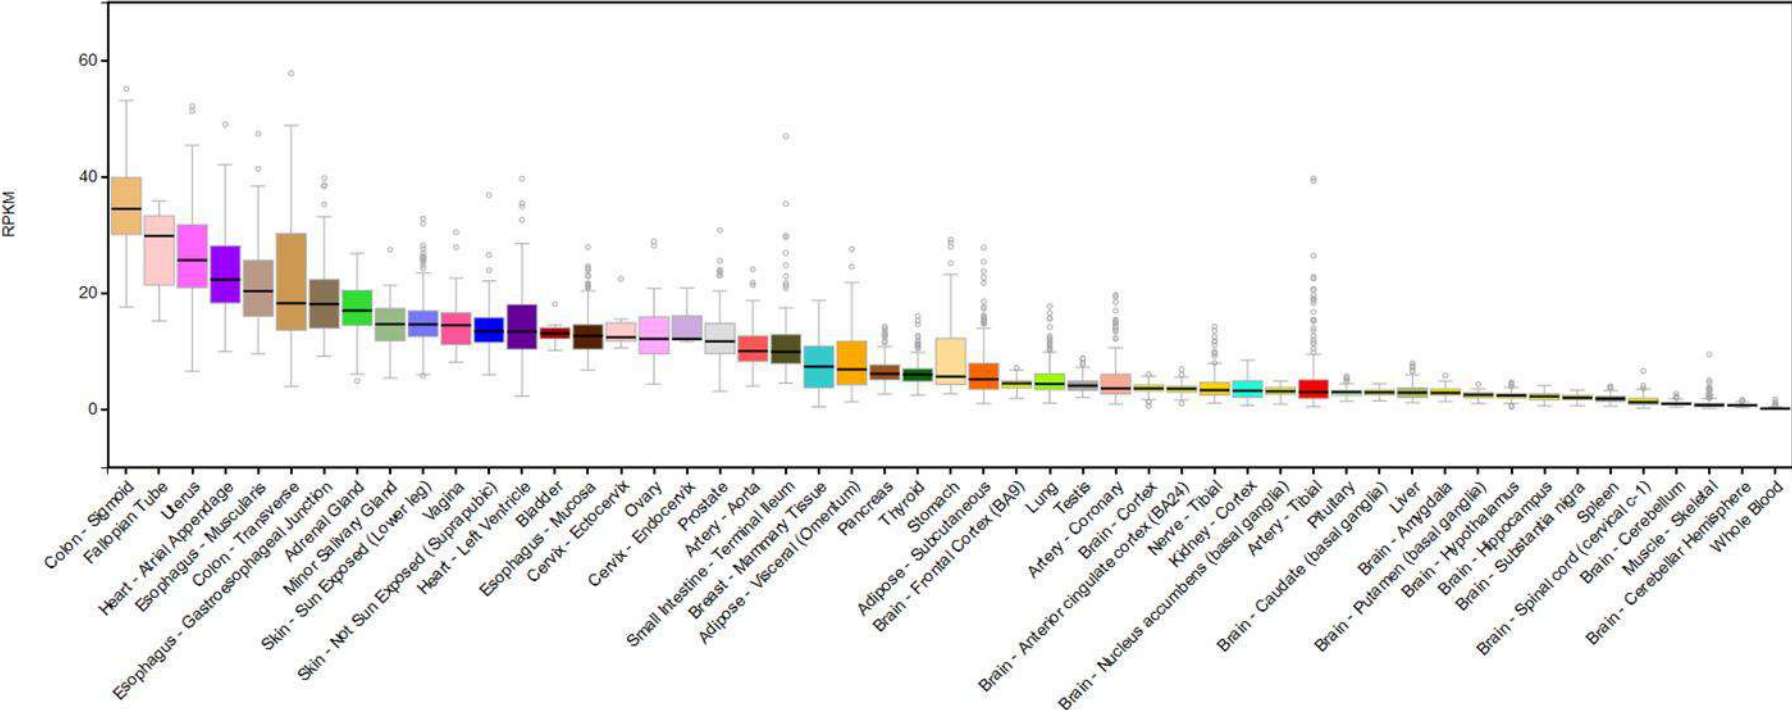



# PPIE

Median RPKM of highest tissue: 11.860

Plot:  Gene  Isoform

Differentiation:  None  Gender

Scale:  Log  Linear

Sort: ABC ▲ ▼

Outliers:  On  Off

Display:  Boxes  Medians

Filter:  Tissue

PPIE Gene Expression

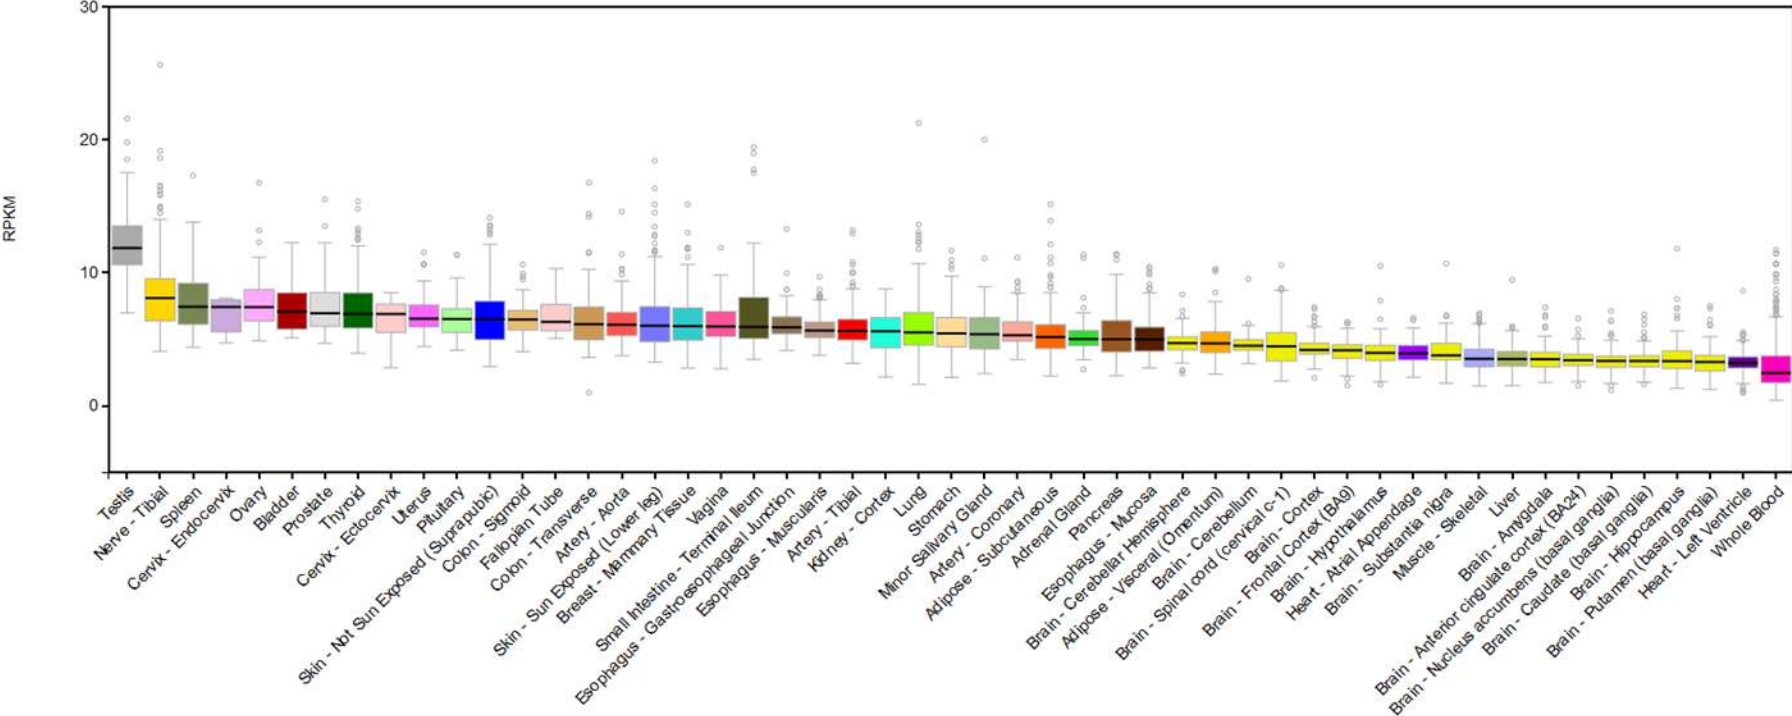

# FNDC3A

Median RPKM of highest tissue: 29.557

Plot:  Gene  Isoform

Differentiation:  None  Gender

Scale:  Log  Linear

Sort: ABC  ▲  ▼

Outliers:  On  Off

Display:  Boxes  Medians

Filter:  Tissue

FNDC3A Gene Expression

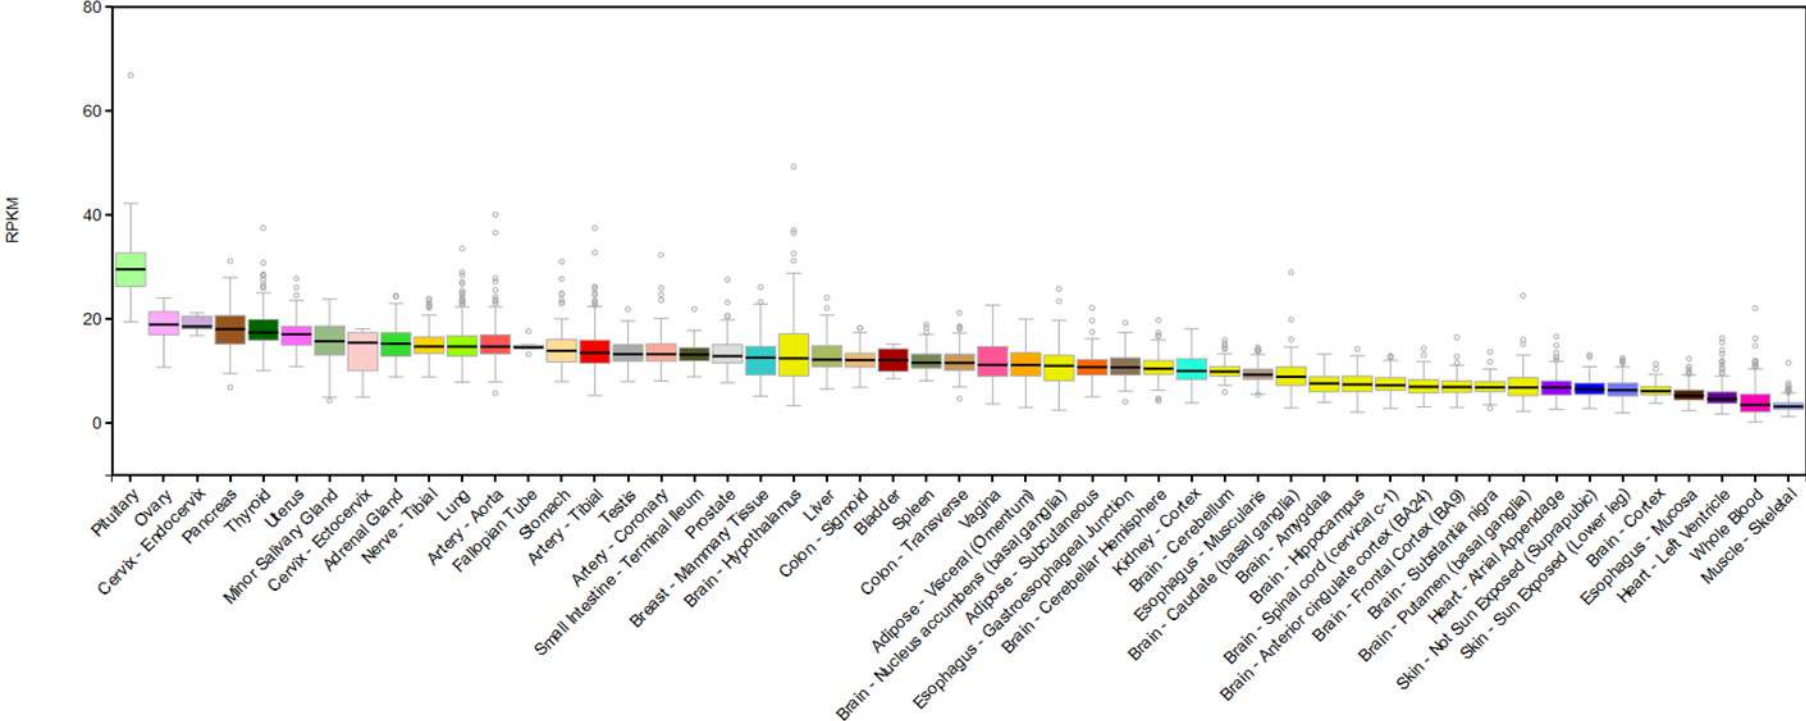

# LRRC42

Median RPKM of highest tissue: 17.695

Plot:  Gene  Isoform  
Differentiation:  None  Gender  
Scale:  Log  Linear  
Sort: ABC  ▲  ▼  
Outliers:  On  Off  
Display:  Boxes  Medians  
Filter:  Tissue

LRRC42 Gene Expression

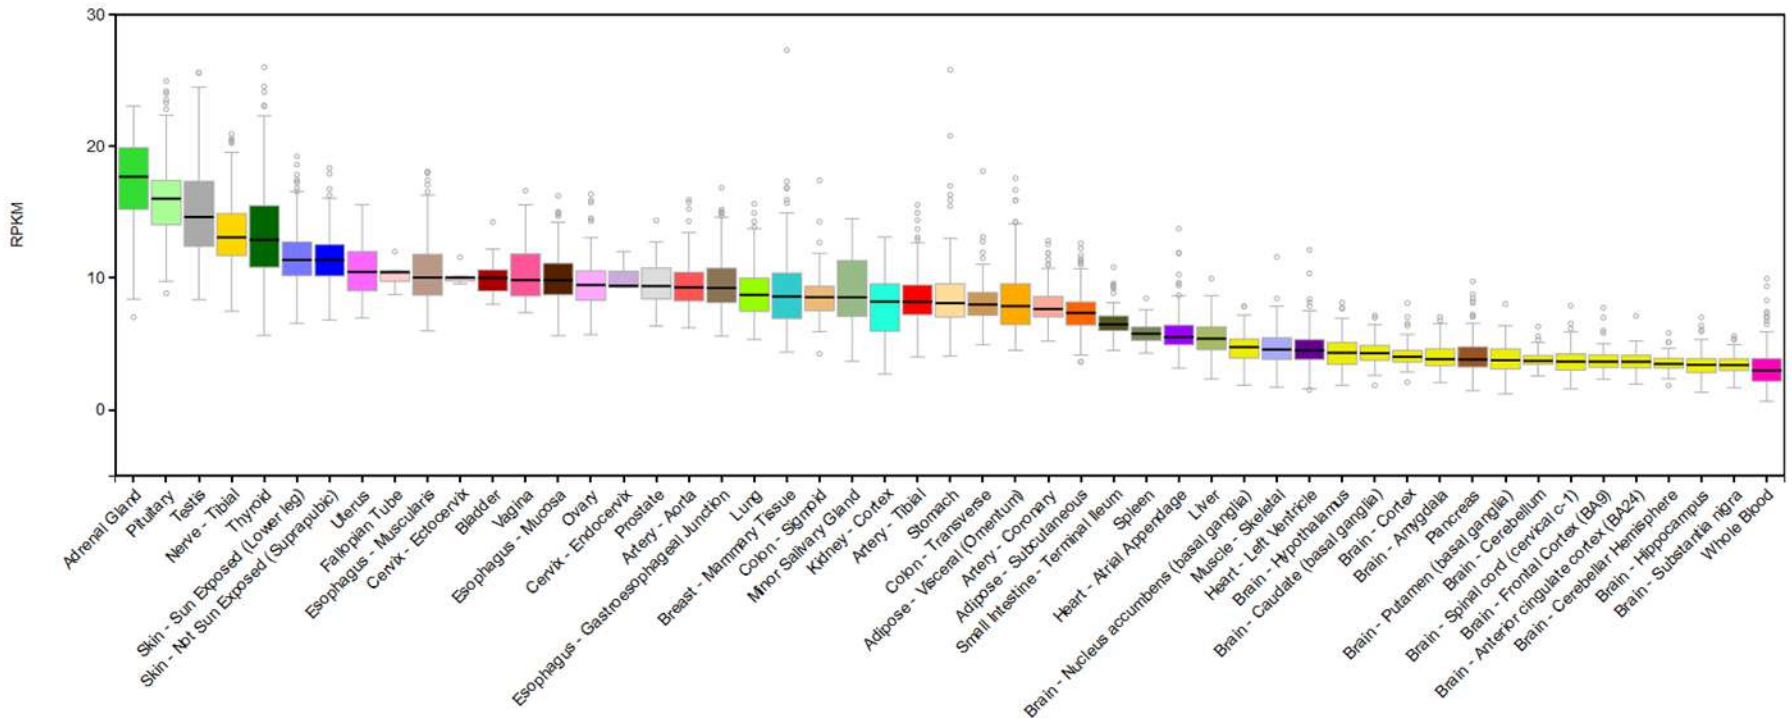

Class II

# MSLN

Median RPKM of highest tissue: 31.974

Uterus: 2.672

Plot:  Gene  Isoform

Differentiation:  None  Gender

Scale:  Log  Linear

Sort: ABC ▲ ▼

Outliers:  On  Off

Display:  Boxes  Medians

Filter:  Tissue

MSLN Gene Expression

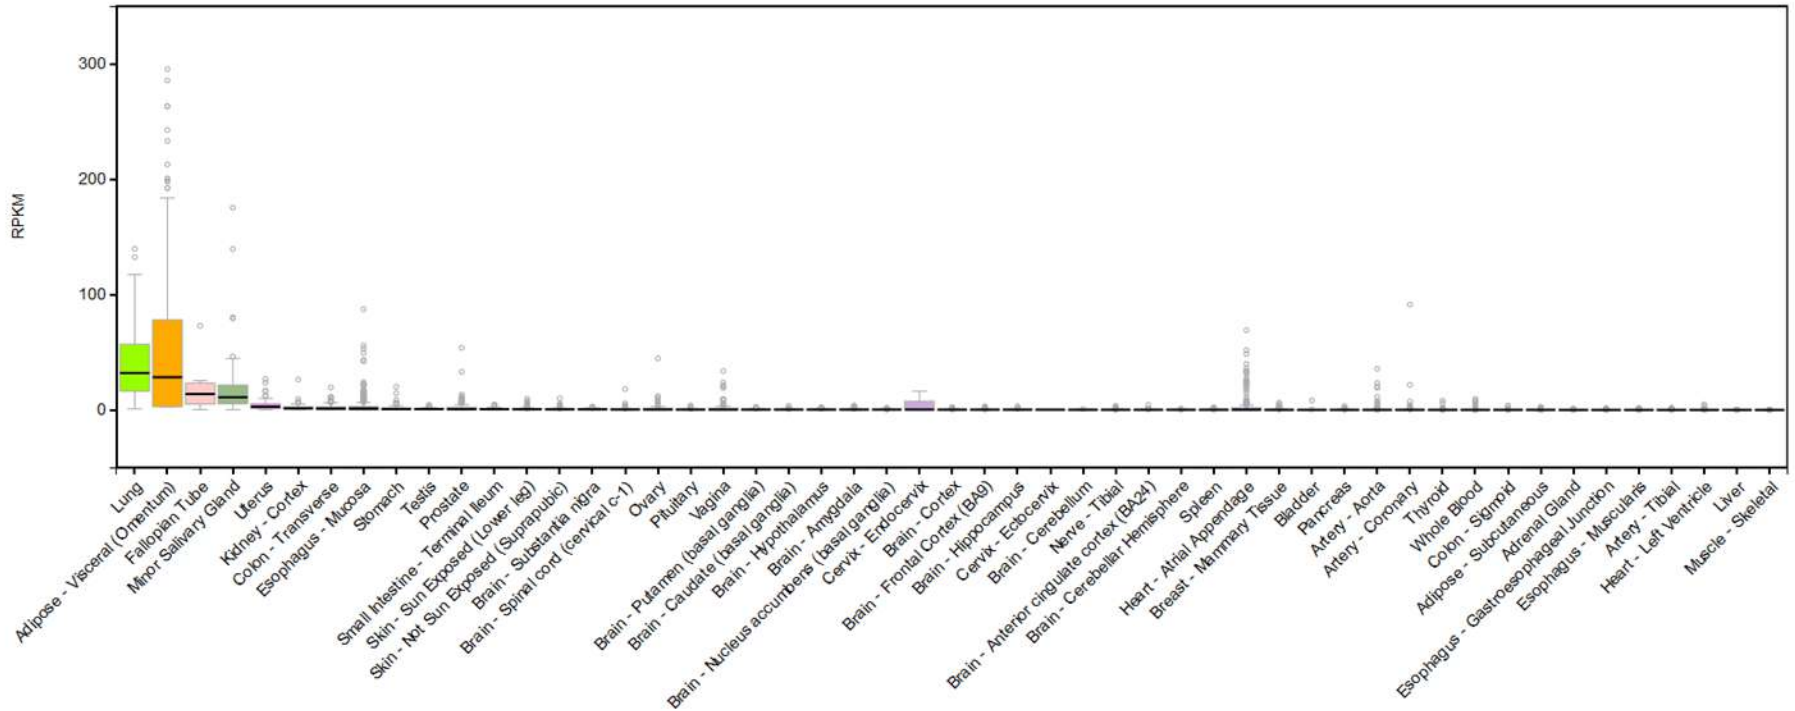

# PTPRF

Median RPKM of highest tissue: 47.961

Plot:  Gene  Isoform

Differentiation:  None  Gender

Scale:  Log  Linear

Sort: ABC ▲ ▼

Outliers:  On  Off

Display:  Boxes  Medians

Filter:  Tissue

PTPRF Gene Expression





# PTGFRN

Median RPKM of highest tissue: 34.478

Plot:  Gene  Isoform  
Differentiation:  None  Gender  
Scale:  Log  Linear  
Sort: ABC  ▲  ▼  
Outliers:  On  Off  
Display:  Boxes  Medians  
Filter:  Tissue

PTGFRN Gene Expression



# PTPRS

Median RPKM of highest tissue: 36.965

Plot: Gene  Isoform  
Differentiation: None  Gender  
Scale: Log  Linear  
Sort: ABC  ▲  ▼  
Outliers: On  Off  
Display: Boxes  Medians  
Filter: Tissue

PTPRS Gene Expression

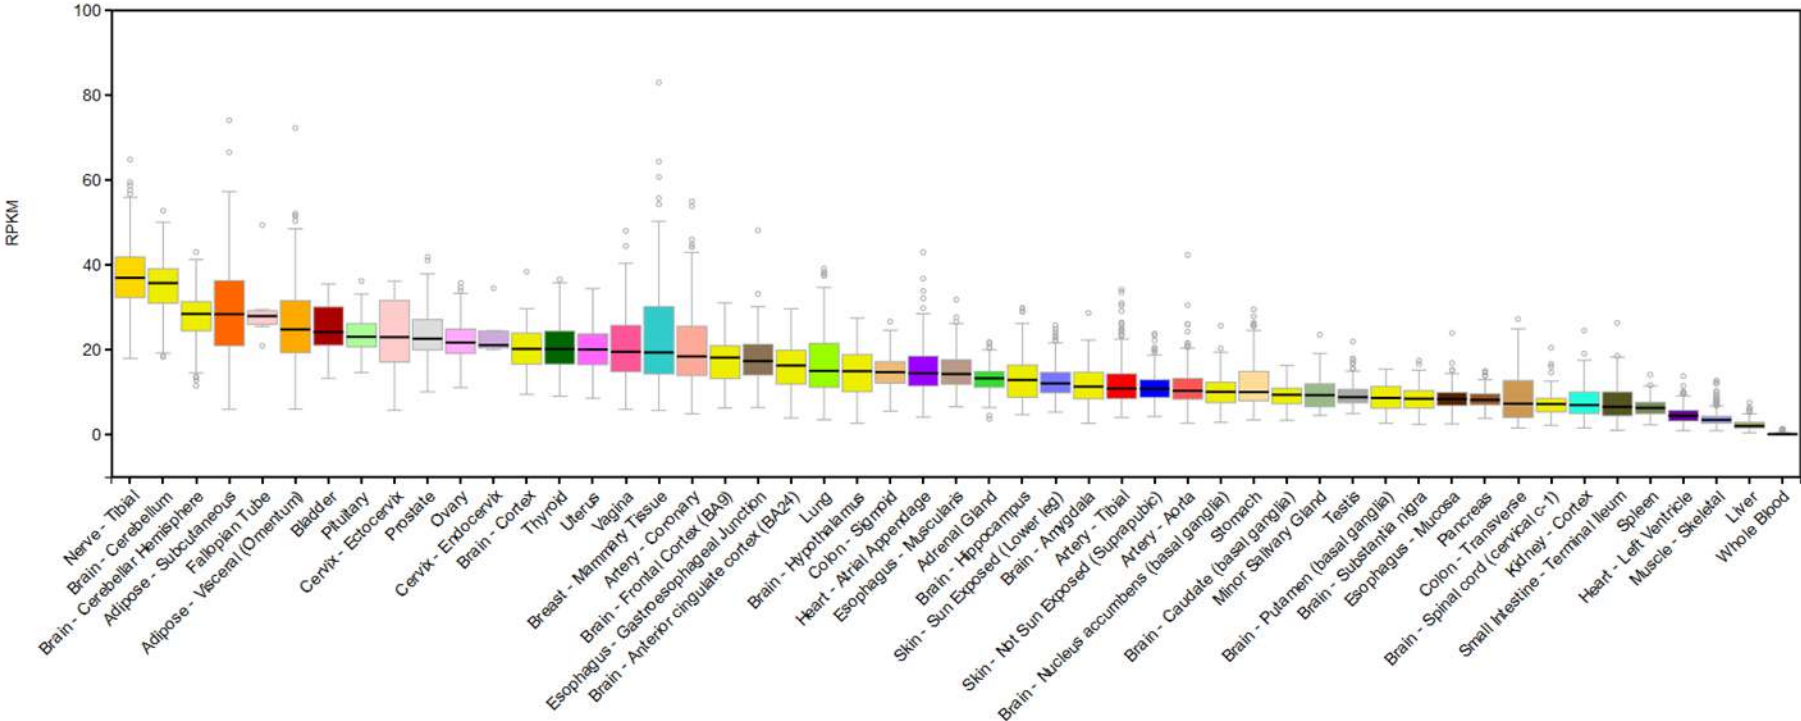

# UBB

Median RPKM of highest tissue: 936.148

Plot:      Differentiation:      Scale:      Sort:       Outliers:      Display:      Filter:

UBB Gene Expression

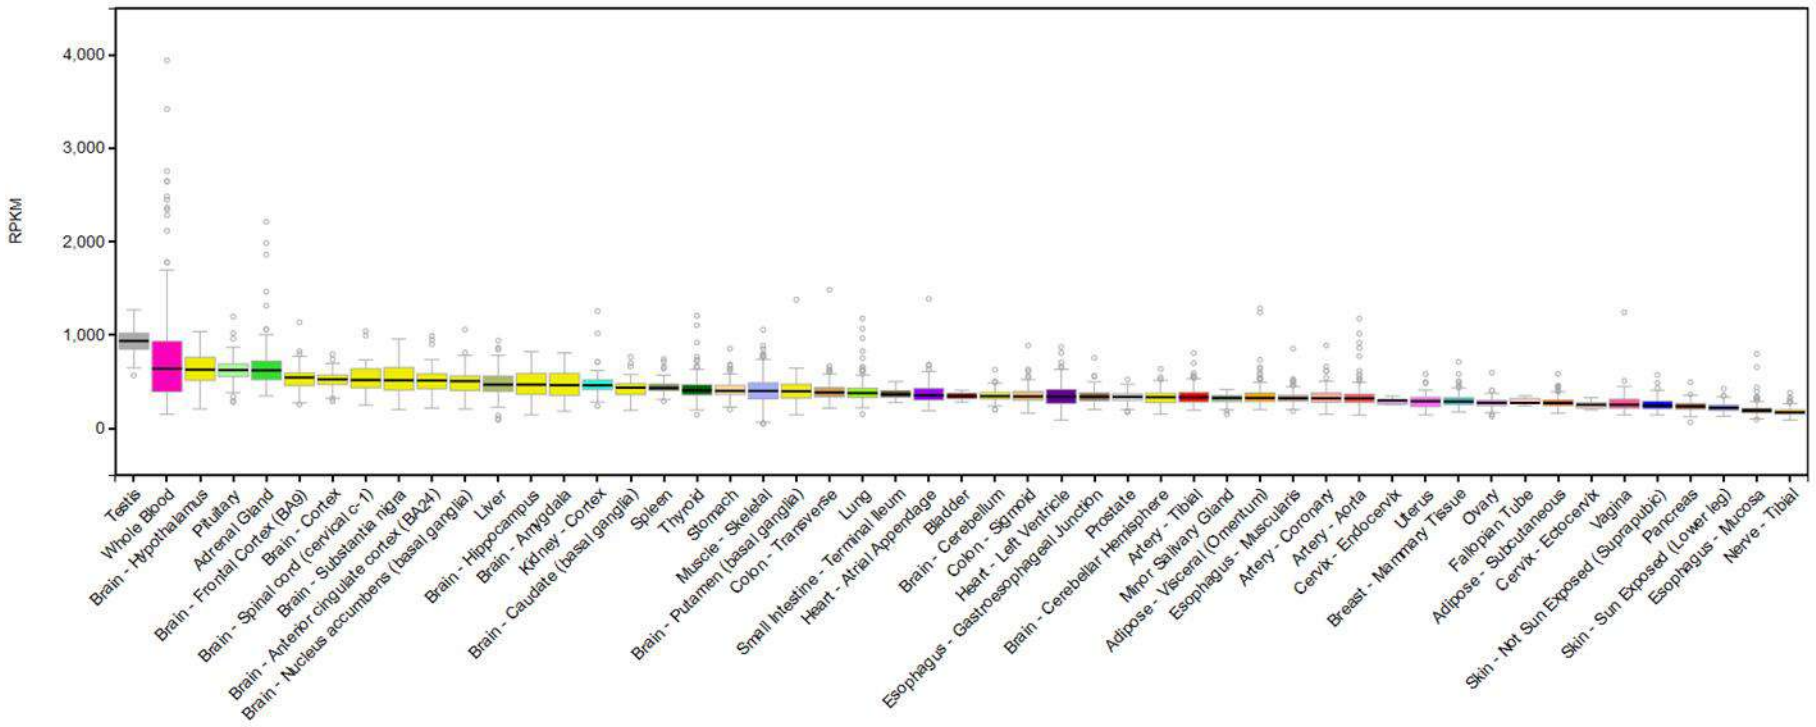

# UBC

Median RPKM of highest tissue: 618.042

Plot:  Gene  Isoform

Differentiation:  None  Gender

Scale:  Log  Linear

Sort: ABC ▲ ▼

Outliers:  On  Off

Display:  Boxes  Medians

Filter:  Tissue

UBC Gene Expression

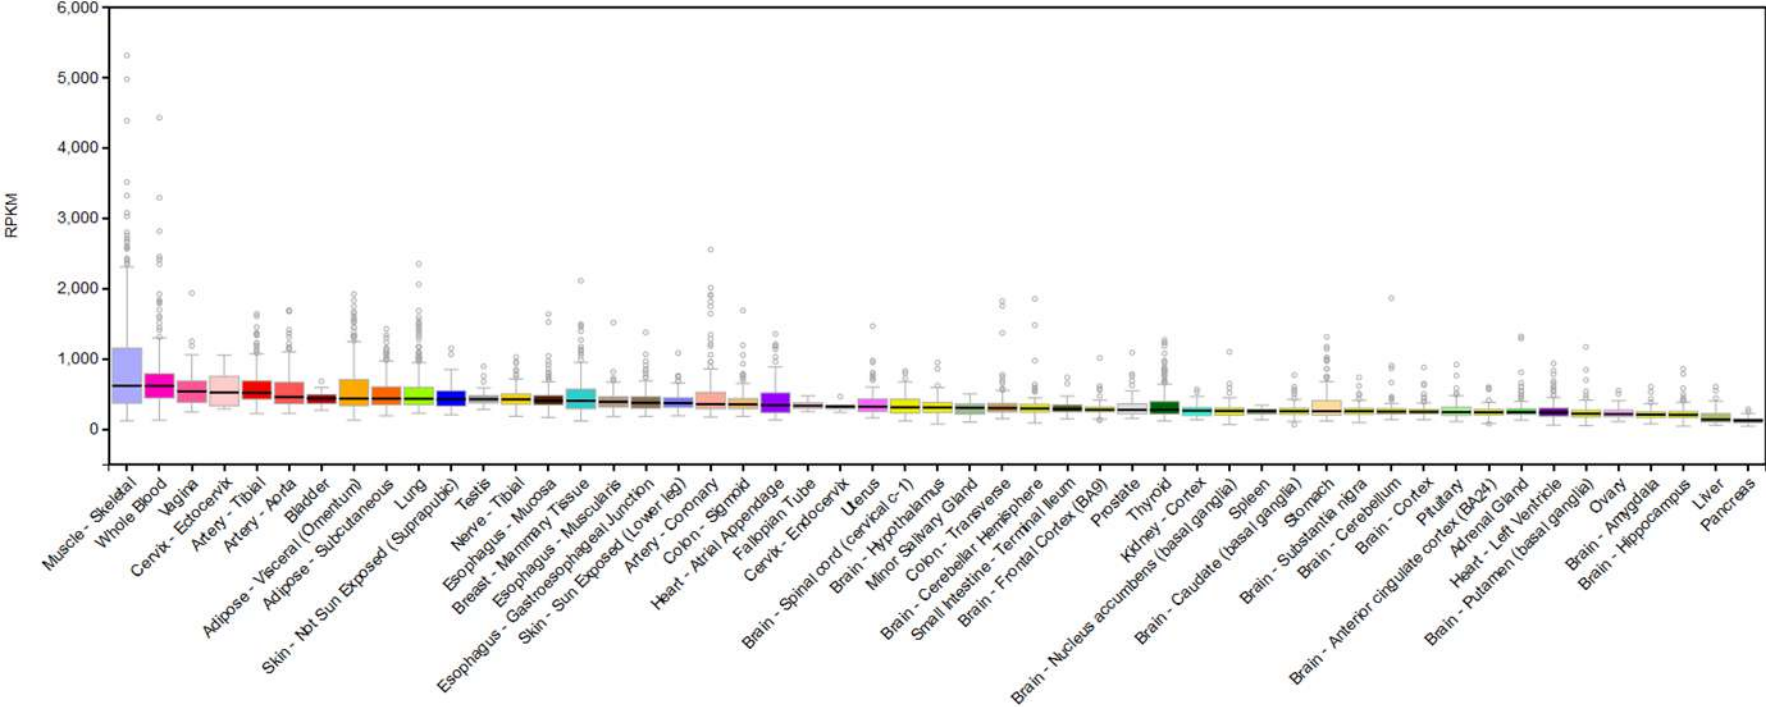

# UBA52

Median RPKM of highest tissue: 262.847

Plot:  Gene  Isoform

Differentiation:  None  Gender

Scale:  Log  Linear

Sort: ABC ▲ ▼

Outliers:  On  Off

Display:  Boxes  Medians

Filter:  Tissue

UBA52 Gene Expression

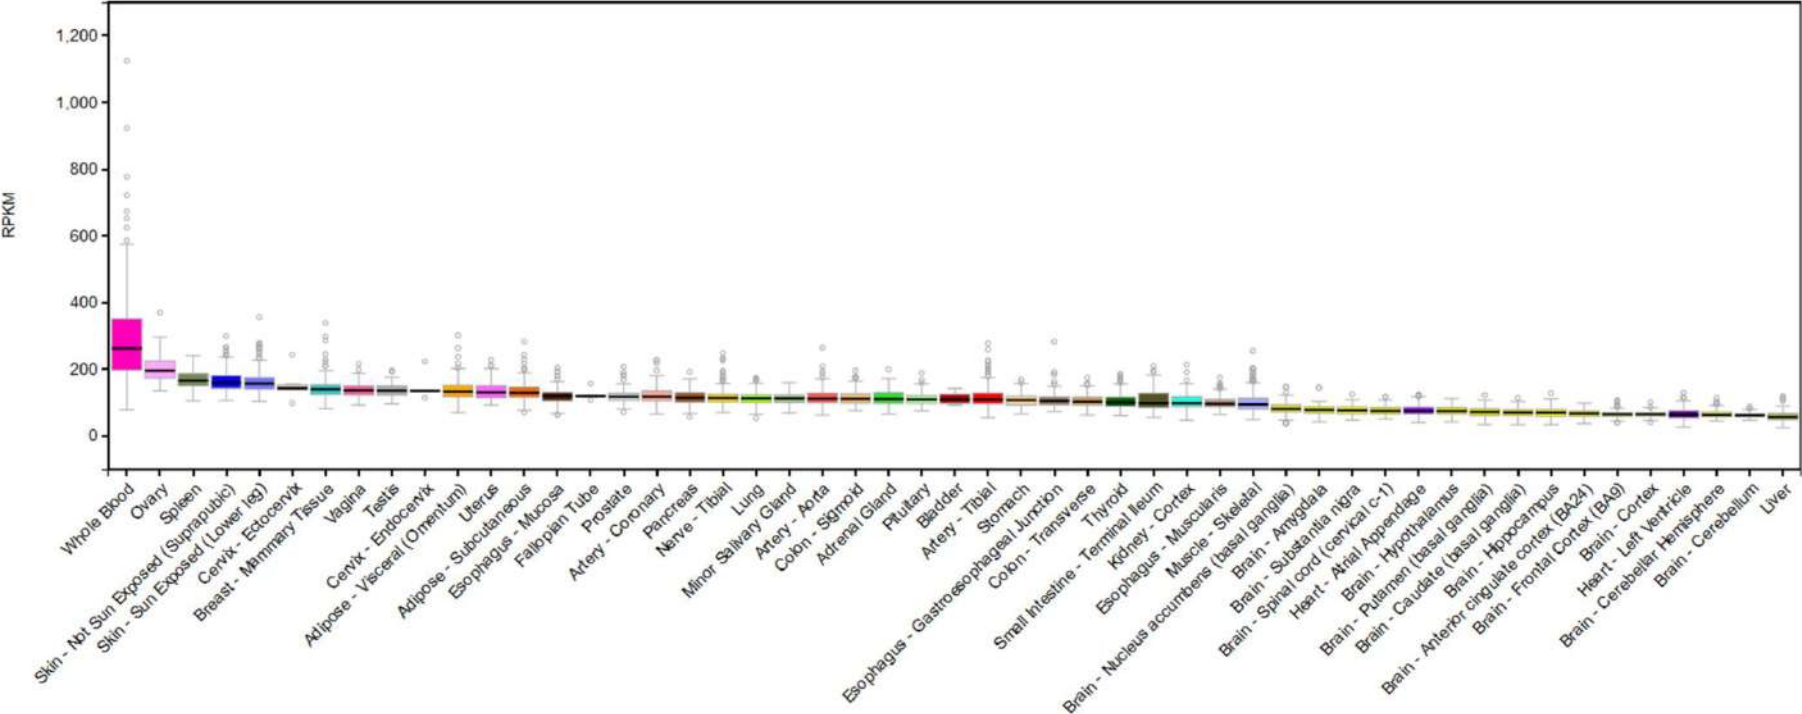



# SQSTM1

Median RPKM of highest tissue: 75.507

Plot:  Gene  Isoform

Differentiation:  None  Gender

Scale:  Log  Linear

Sort: ABC ▲ ▼

Outliers:  On  Off

Display:  Boxes  Medians

Filter:  Tissue

SQSTM1 Gene Expression

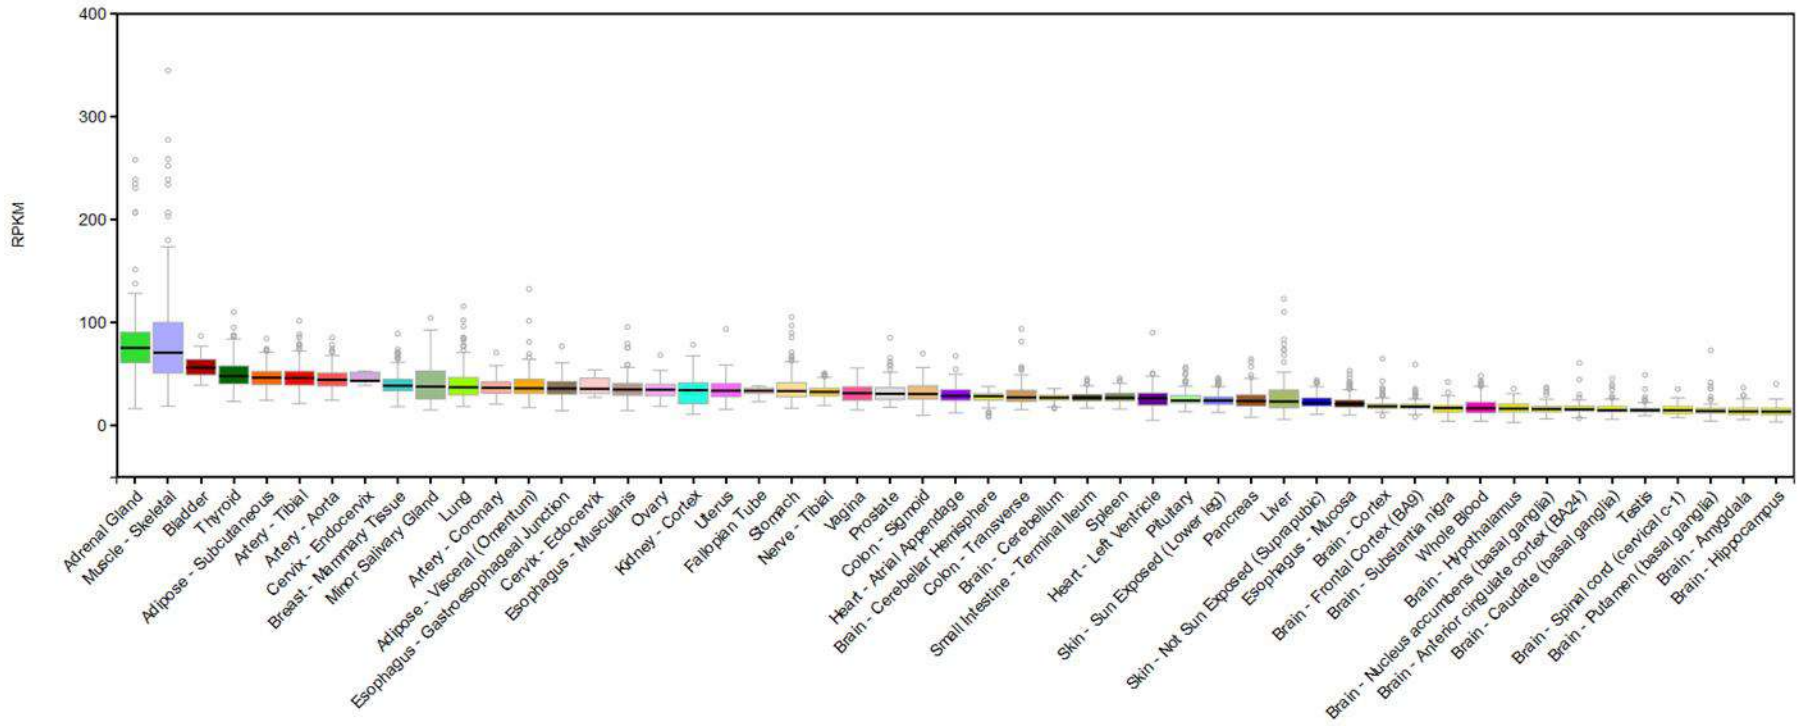



# ADRG2

Median RPKM of highest tissue: 28.310

Plot:  Gene  Isoform

Differentiation:  None  Gender

Scale:  Log  Linear

Sort: ABC  ▲  ▼

Outliers:  On  Off

Display:  Boxes  Medians

Filter:

ARG2 Gene Expression

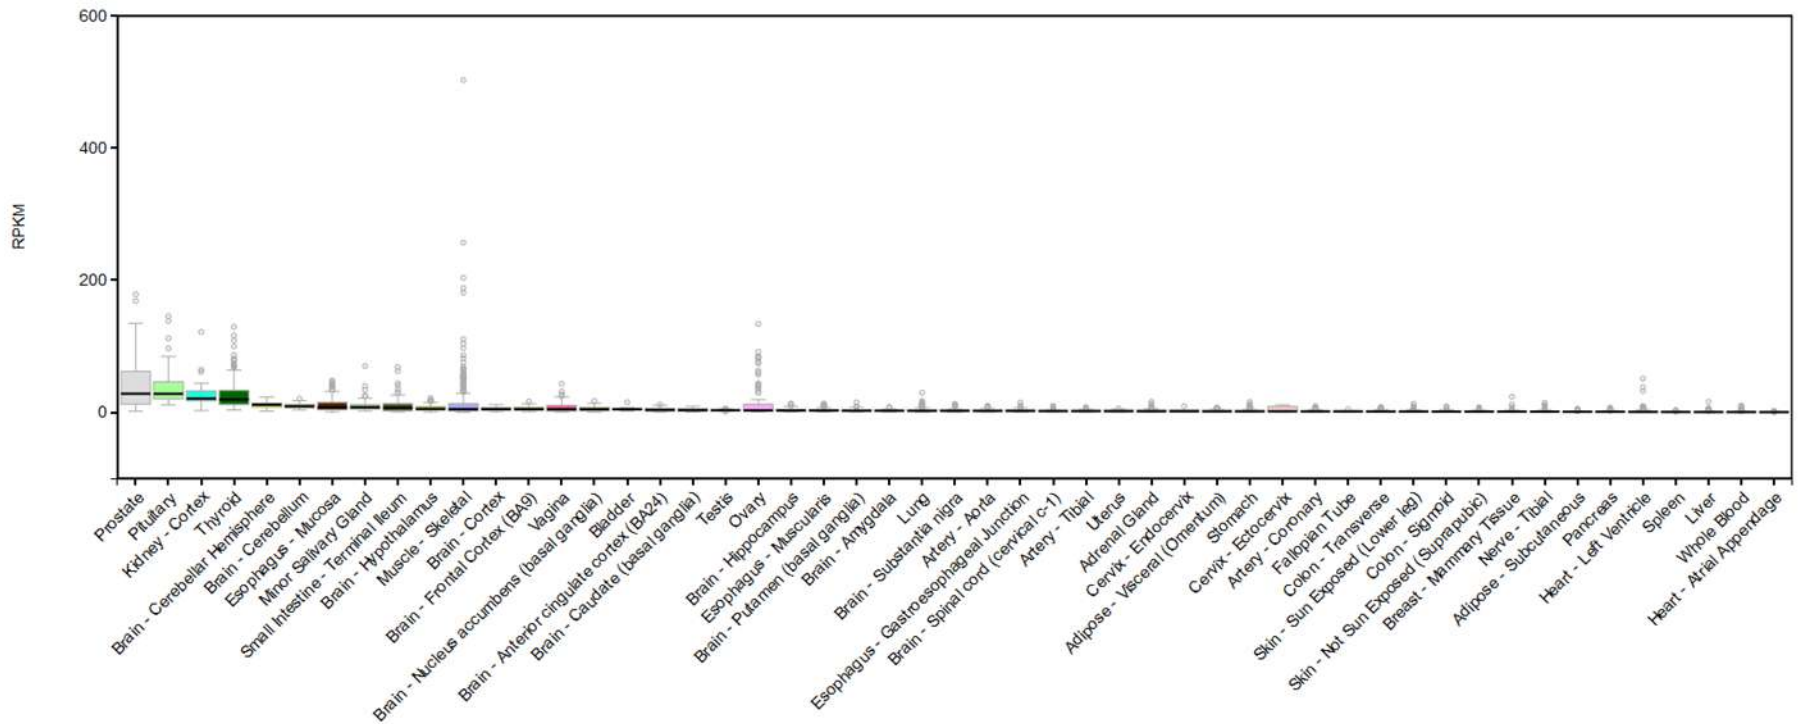

# ITGB5

Median RPKM of highest tissue: 137.828

Plot:      Differentiation:      Scale:      Sort:       Outliers:      Display:      Filter:

ITGB5 Gene Expression

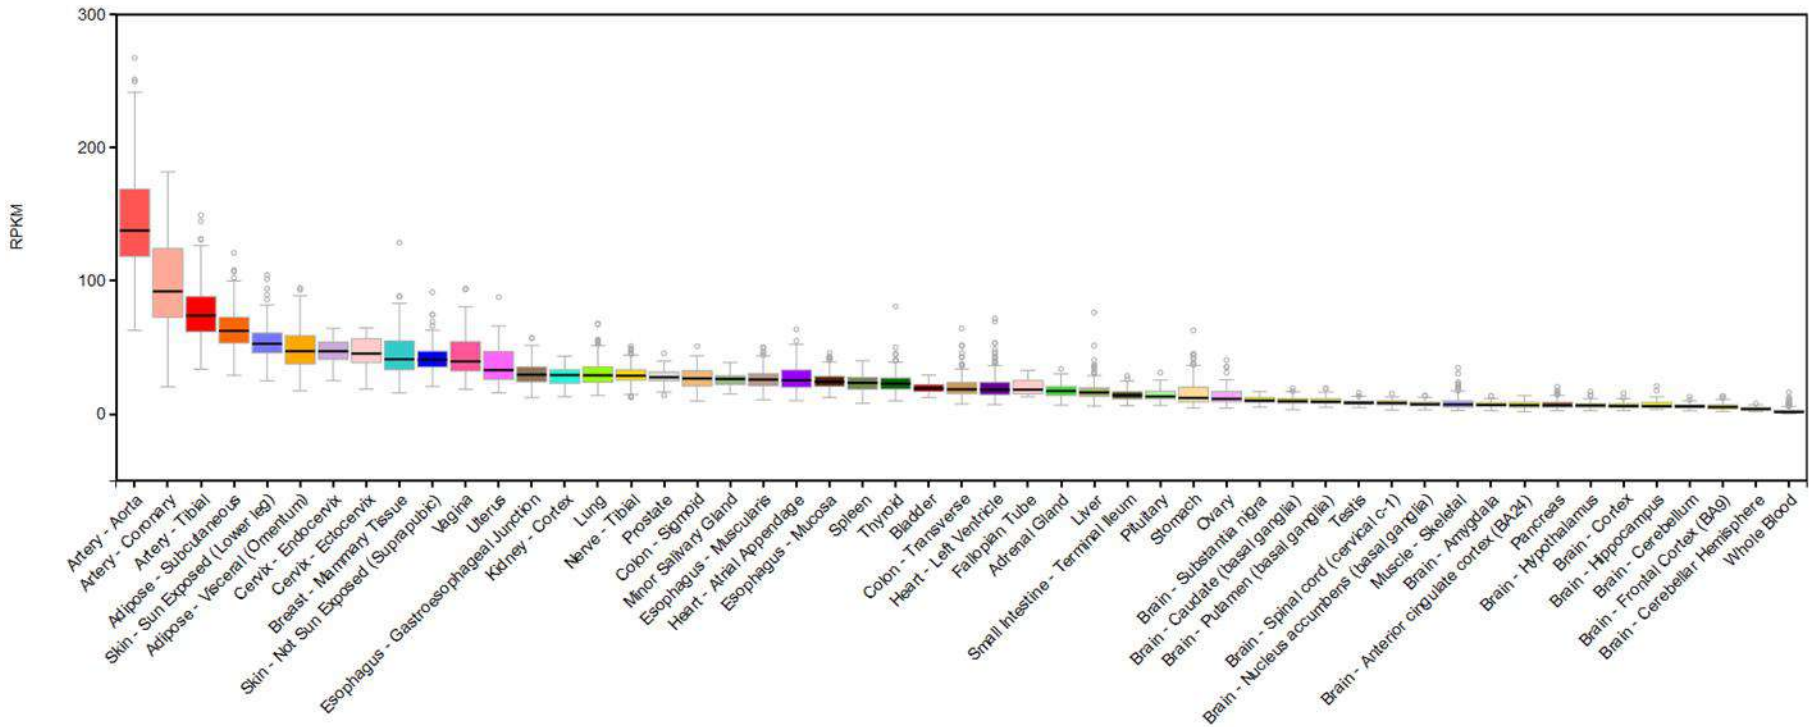

# LCN2

Median RPKM of highest tissue: 283.185

Lung: 12.842

Plot:  Gene  Isoform

Differentiation:  None  Gender

Scale:  Log  Linear

Sort: ABC ▲ ▼

Outliers:  On  Off

Display:  Boxes  Medians

Filter:  Tissue

LCN2 Gene Expression

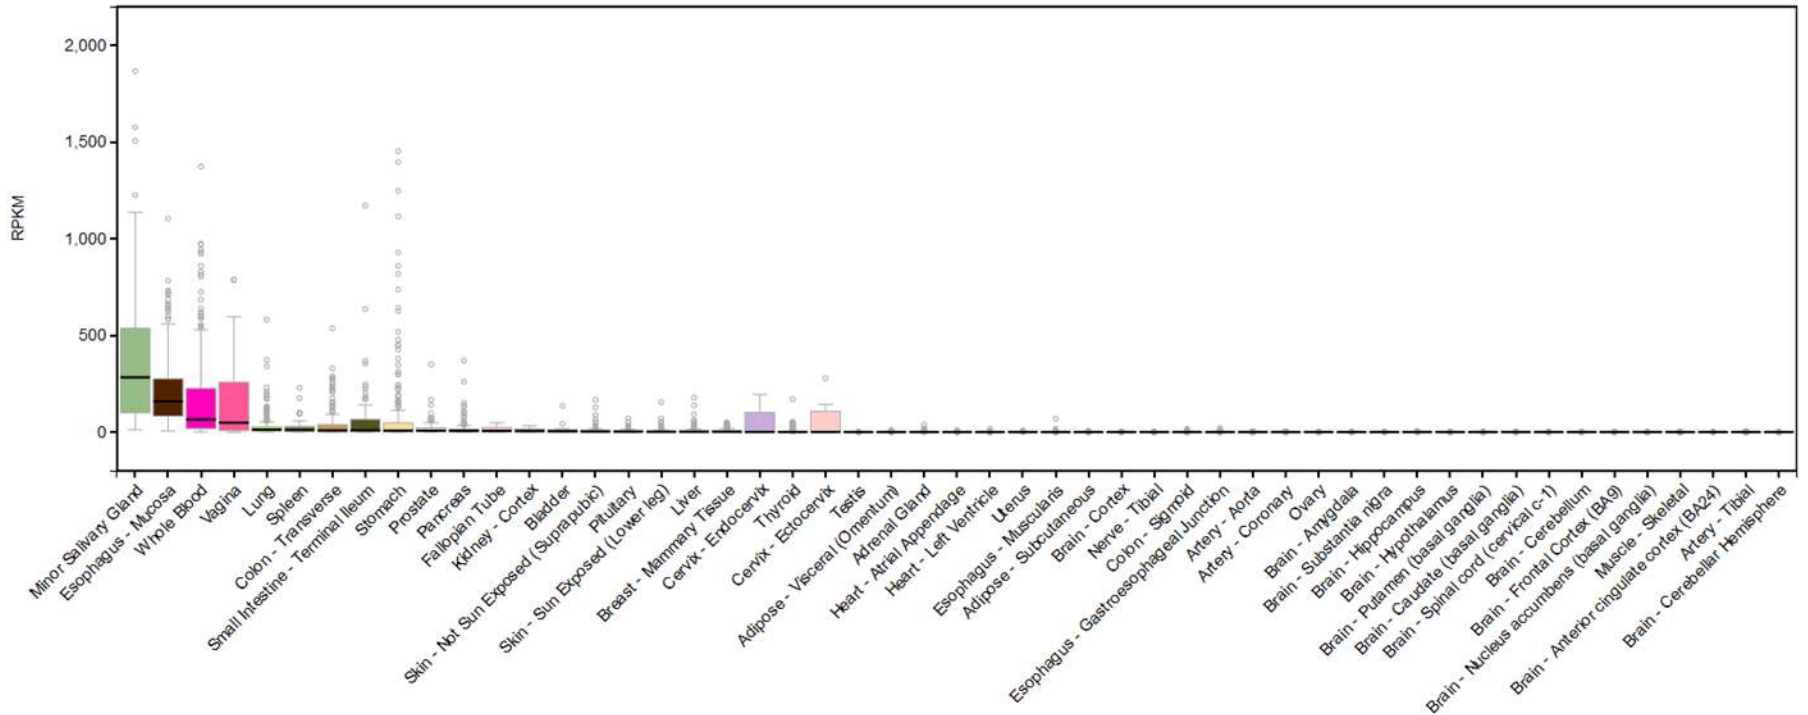

# FAT1

Median RPKM of highest tissue: 13.844

Plot:  Gene  Isoform

Differentiation:  None  Gender

Scale:  Log  Linear

Sort: ABC ▲ ▼

Outliers:  On  Off

Display:  Boxes  Medians

Filter:

FAT1 Gene Expression

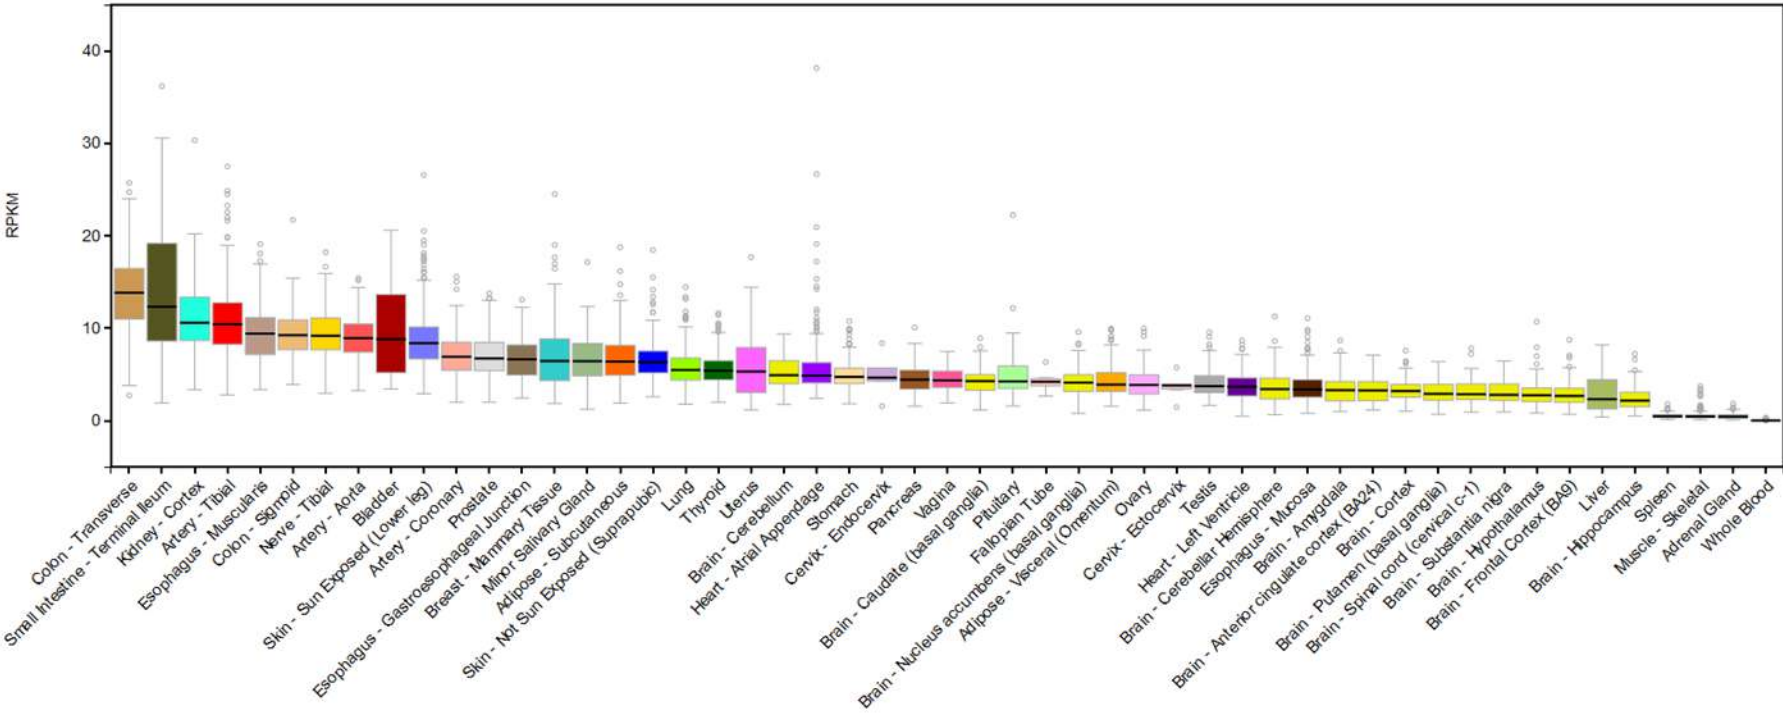

# PLEC

Median RPKM of highest tissue: 82.659

Plot:  Gene  Isoform

Differentiation:  None  Gender

Scale:  Log  Linear

Sort: ABC ▲ ▼

Outliers:  On  Off

Display:  Boxes  Medians

Filter:

PLEC Gene Expression

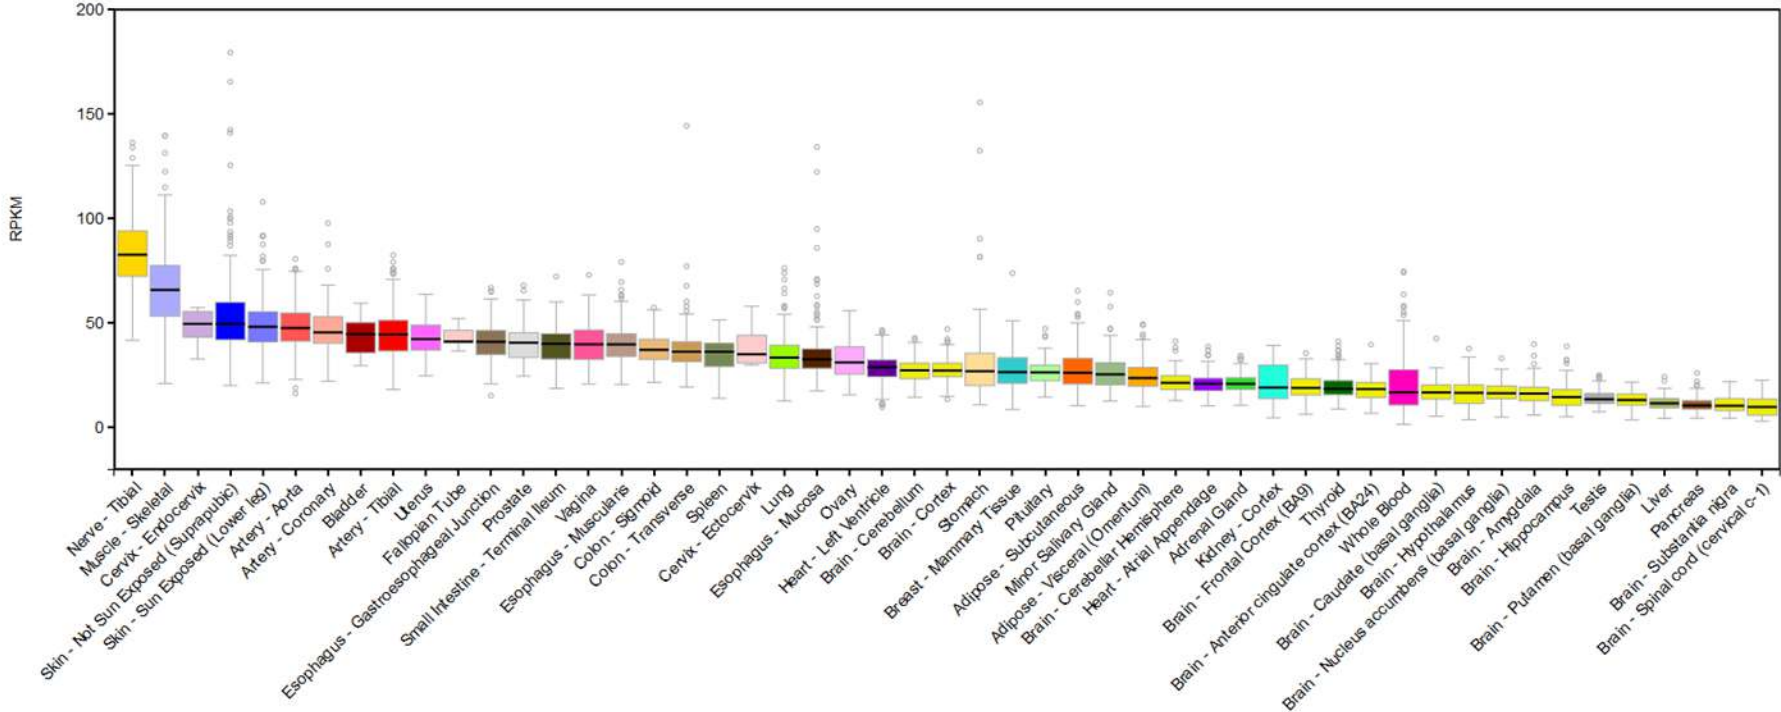

# RCN1

Median RPKM of highest tissue: 27.334

Plot:      Differentiation:      Scale:      Sort:       Outliers:      Display:      Filter:

RCN1 Gene Expression

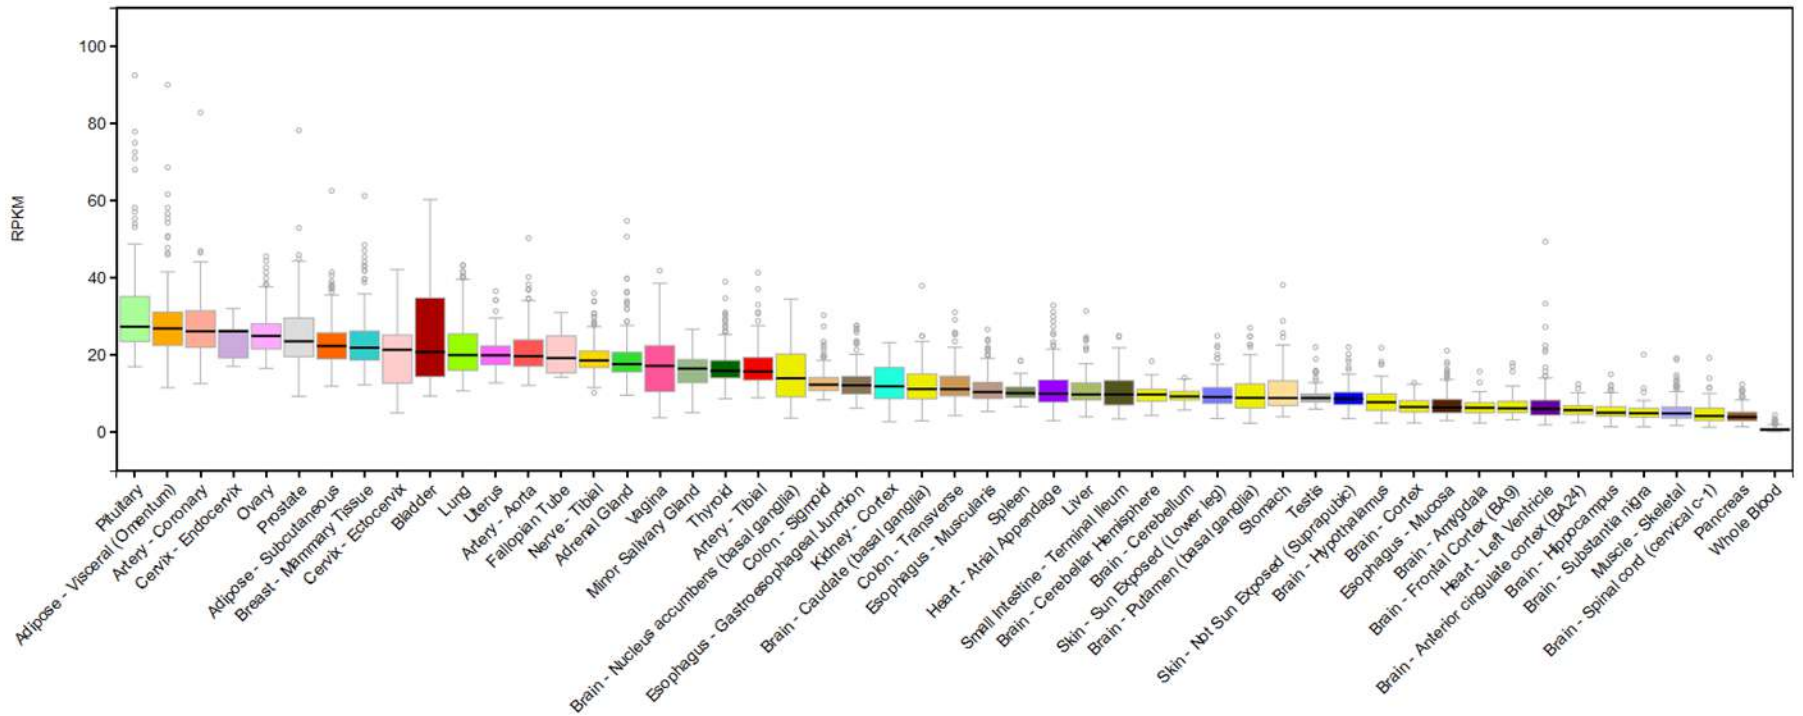



# LAMA3

Median RPKM of highest tissue: 11.287

Plot:      Differentiation:      Scale:      Sort:       Outliers:      Display:      Filter:

LAMA3 Gene Expression

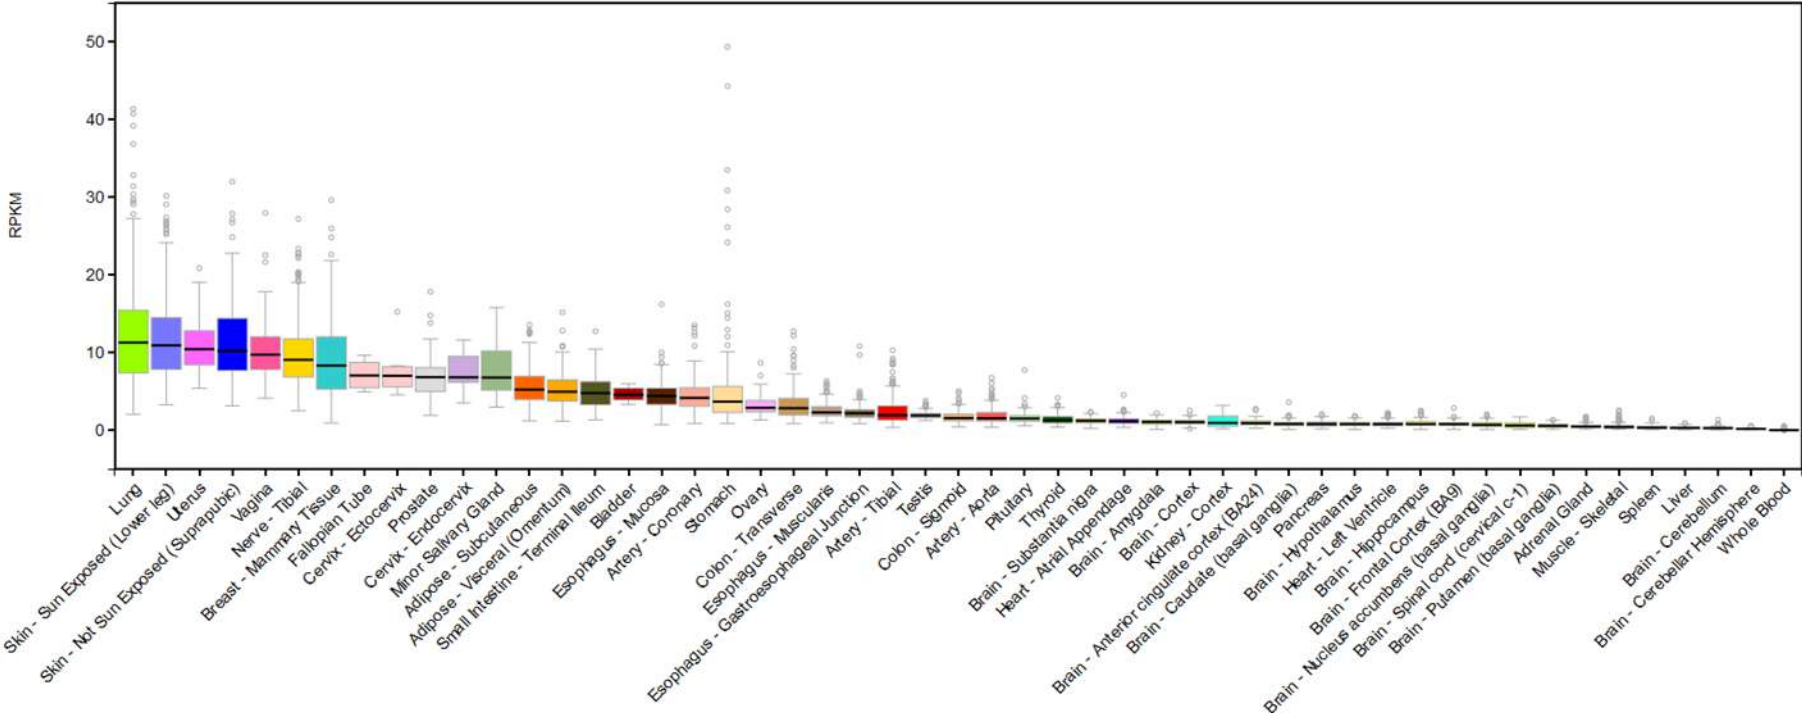

# FNDC1

Median RPKM of highest tissue: 12.276

Plot: Gene (selected) Isoform  
Differentiation: None (selected) Gender  
Scale: Log Linear (selected)  
Sort: ABC (selected) ▲ ▼  
Outliers: On (selected) Off  
Display: Boxes (selected) Medians  
Filter: Tissue

FNDC1 Gene Expression

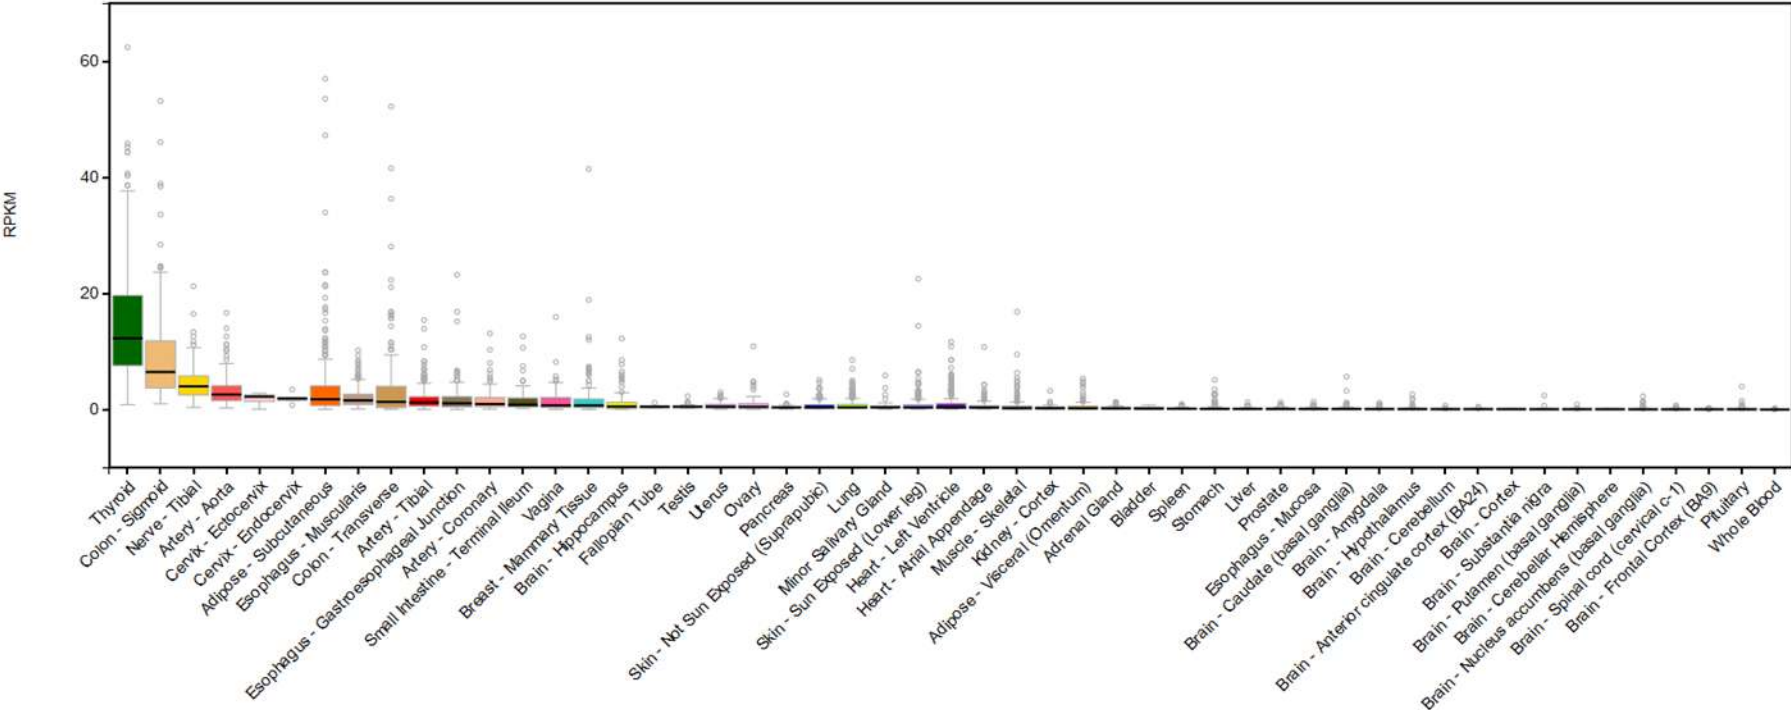

# HTRA1

Median RPKM of highest tissue: 268.567

Plot: Gene (selected) Isoform  
Differentiation: None (selected) Gender  
Scale: Log Linear (selected)  
Sort: ABC (selected) ▲ ▼  
Outliers: On (selected) Off  
Display: Boxes (selected) Medians  
Filter: Tissue

HTRA1 Gene Expression

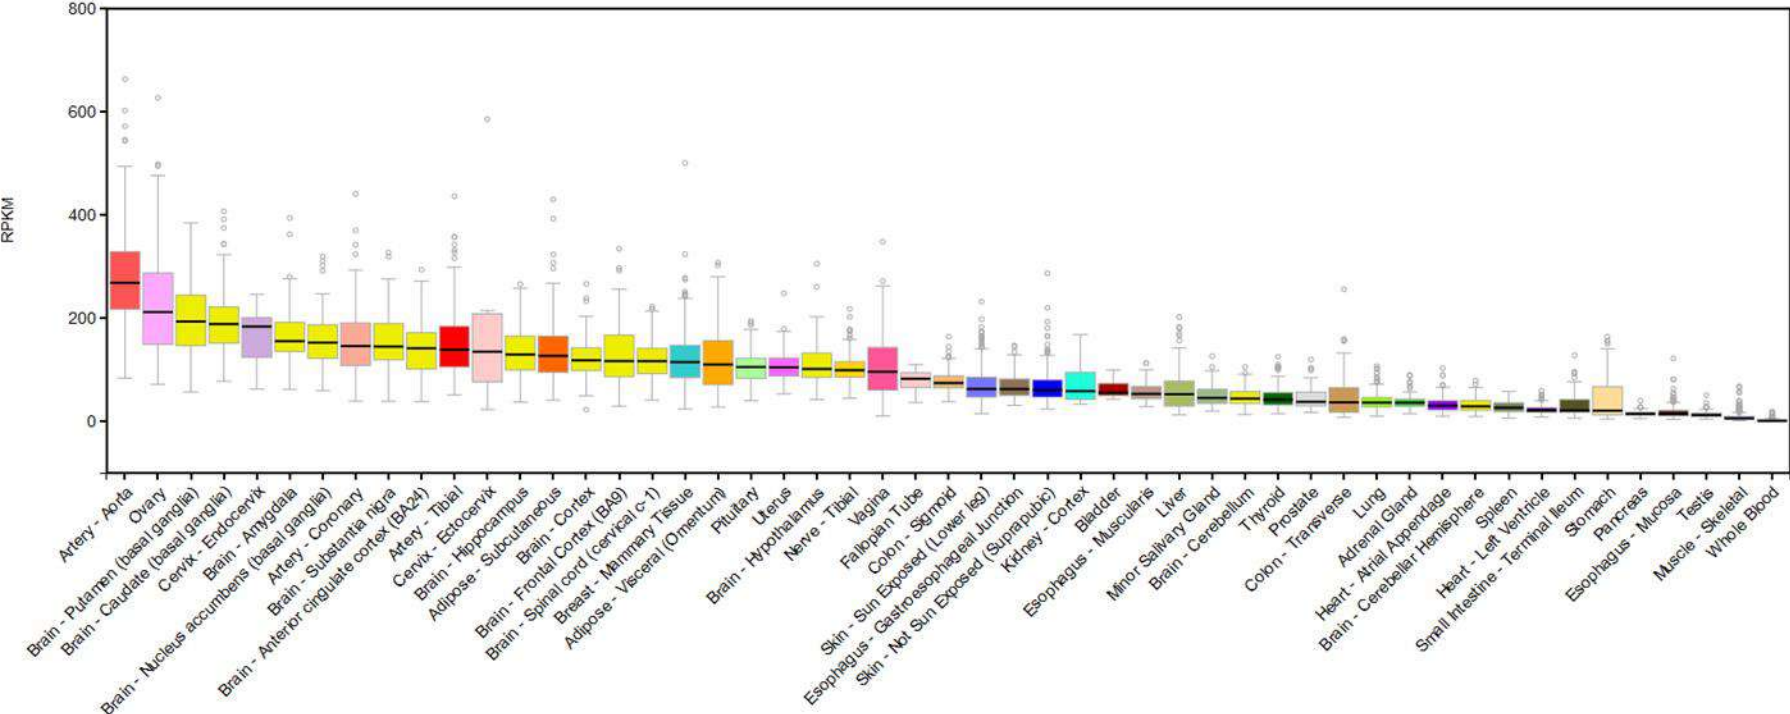

# FARSB

Median RPKM of highest tissue: 16.580

Plot: Gene Isoform | Differentiation: None Gender | Scale: Log Linear | Sort: ABC ▲ ▼ | Outliers: On Off | Display: Boxes Medians | Filter: Tissue

FARSB Gene Expression

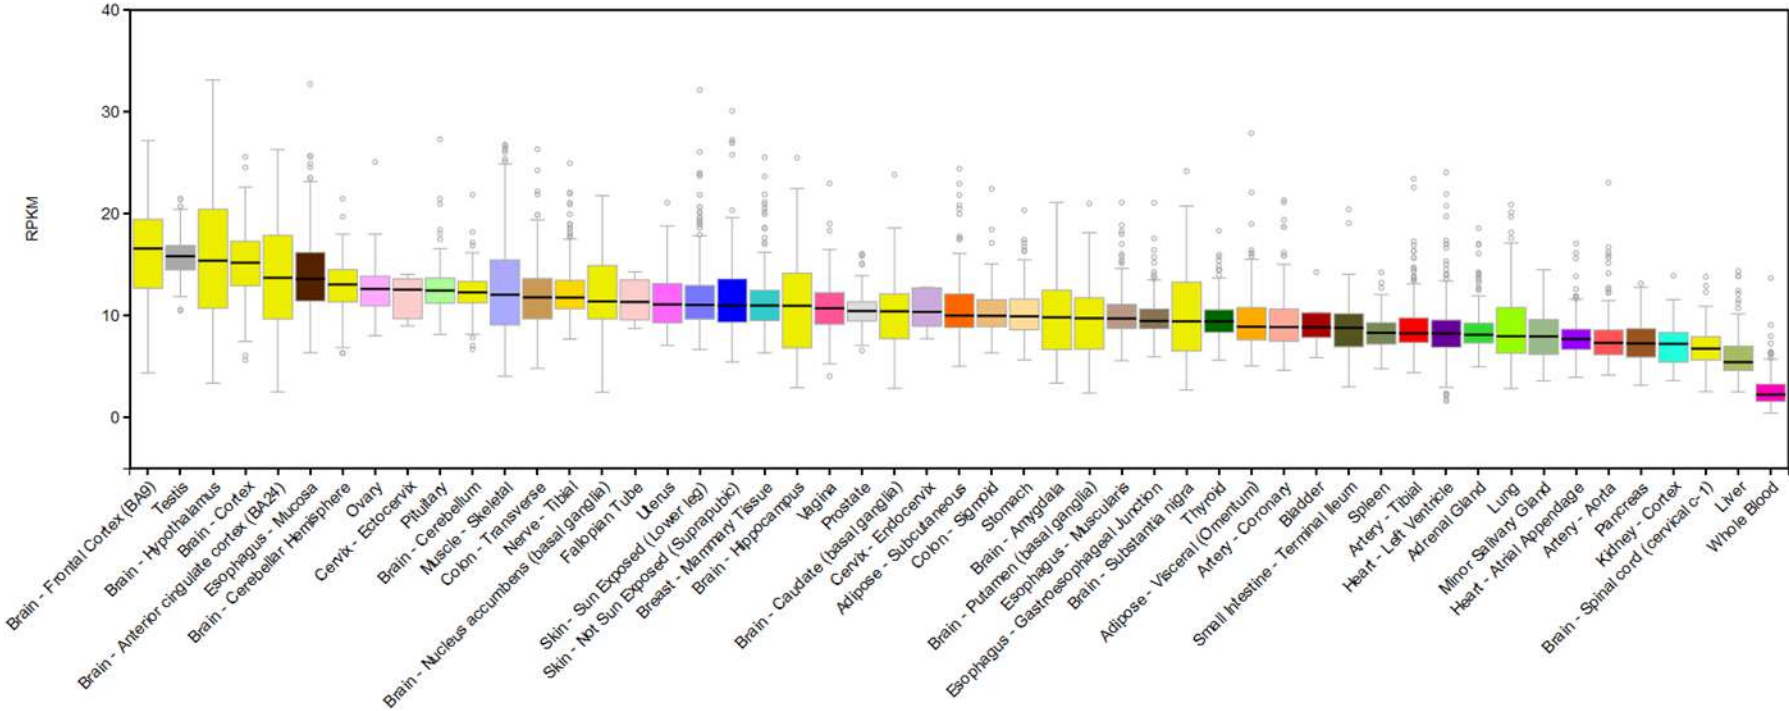

# EFEMP2

Median RPKM of highest tissue: 73.192

Plot:  Gene  Isoform

Differentiation:  None  Gender

Scale:  Log  Linear

Sort: ABC ▲ ▼

Outliers:  On  Off

Display:  Boxes  Medians

Filter:  Tissue

EFEMP2 Gene Expression

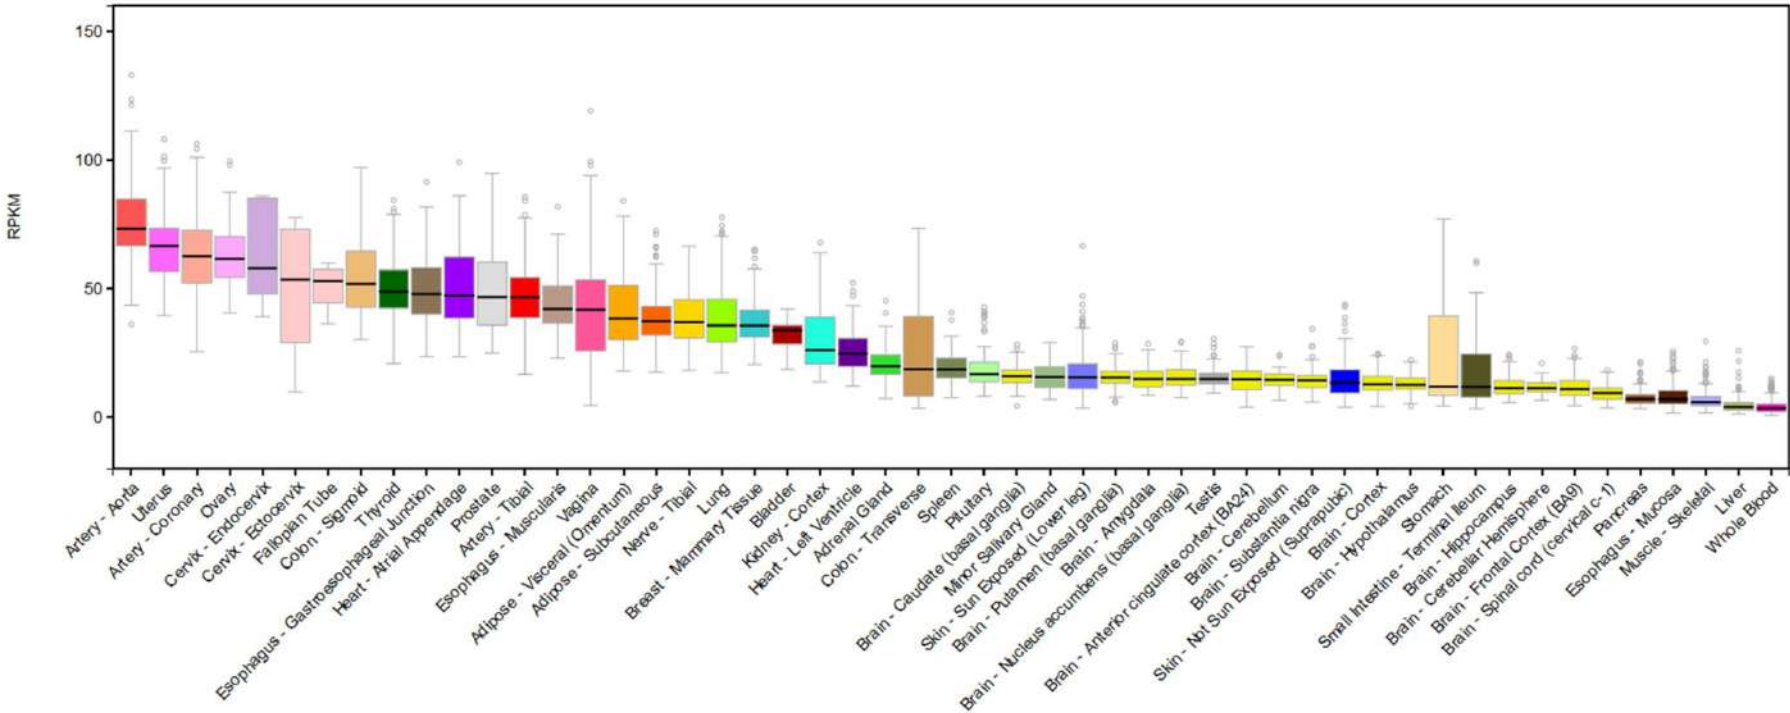



# PRDX2

Median RPKM of highest tissue: 330.525

Plot:      Differentiation:      Scale:      Sort:       Outliers:      Display:      Filter:

PRDX2 Gene Expression

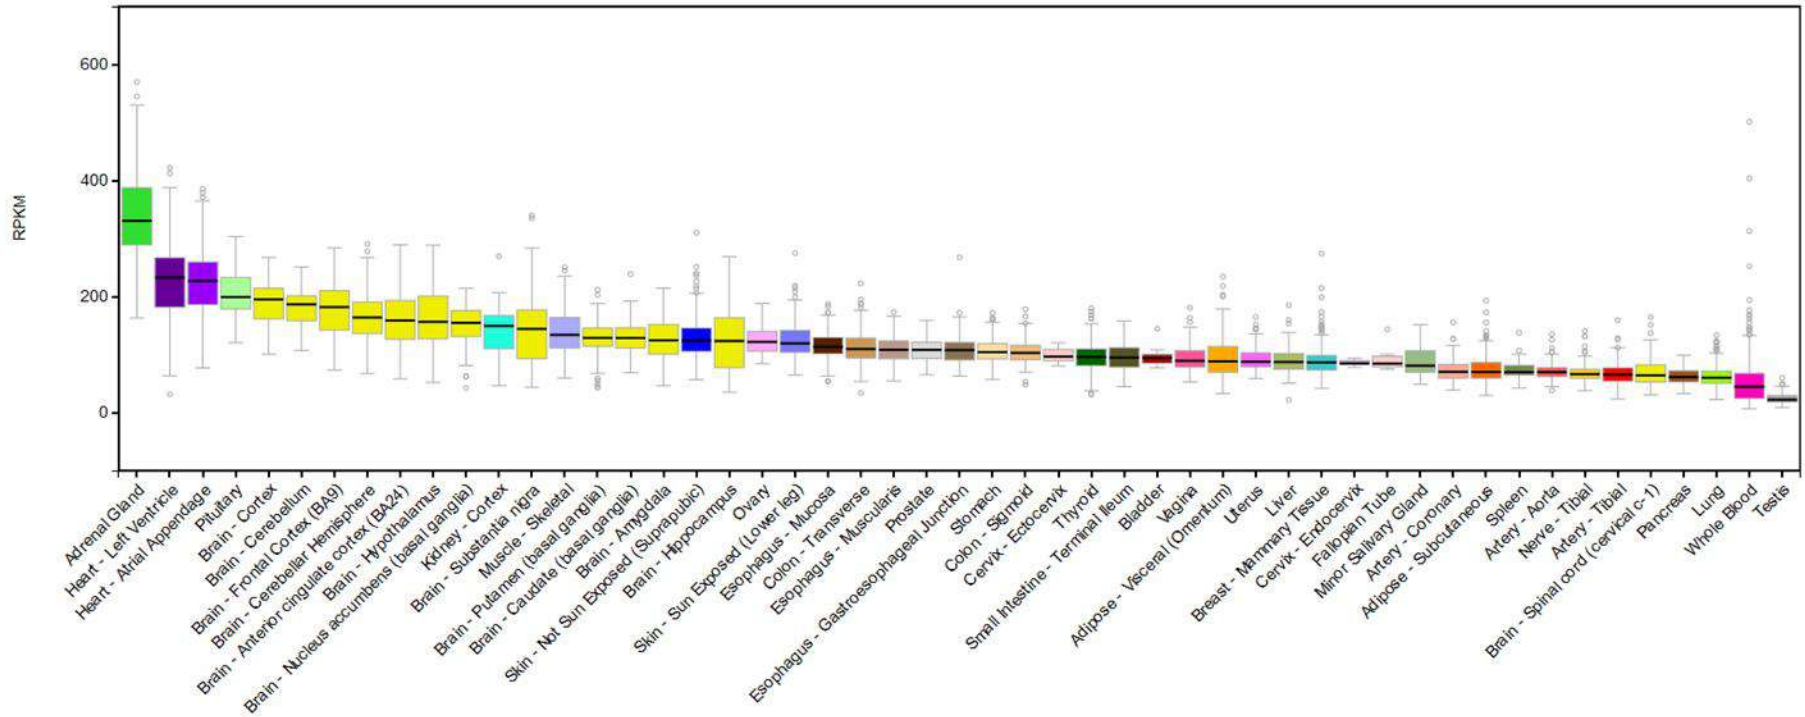



# RARRES1

Median RPKM of highest tissue: 114.133

Plot:  Gene  Isoform

Differentiation:  None  Gender

Scale:  Log  Linear

Sort: ABC ▲ ▼

Outliers:  On  Off

Display:  Boxes  Medians

Filter:  Tissue

RARRES1 Gene Expression

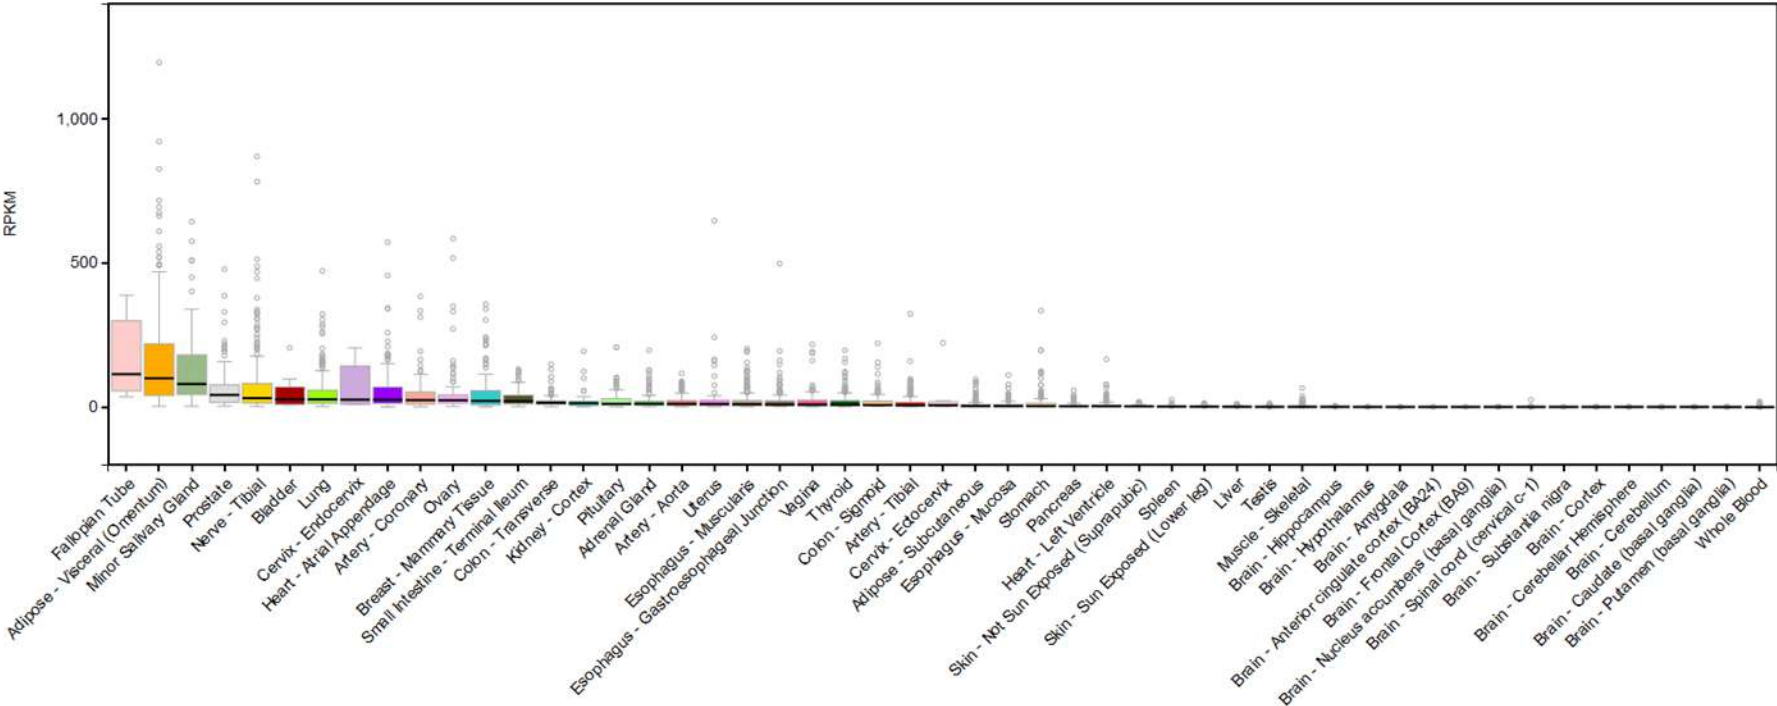

# CXADR

Median RPKM of highest tissue: 14.158

Plot:  Gene  Isoform

Differentiation:  None  Gender

Scale:  Log  Linear

Sort: ABC ▲ ▼

Outliers:  On  Off

Display:  Boxes  Medians

Filter:

CXADR Gene Expression

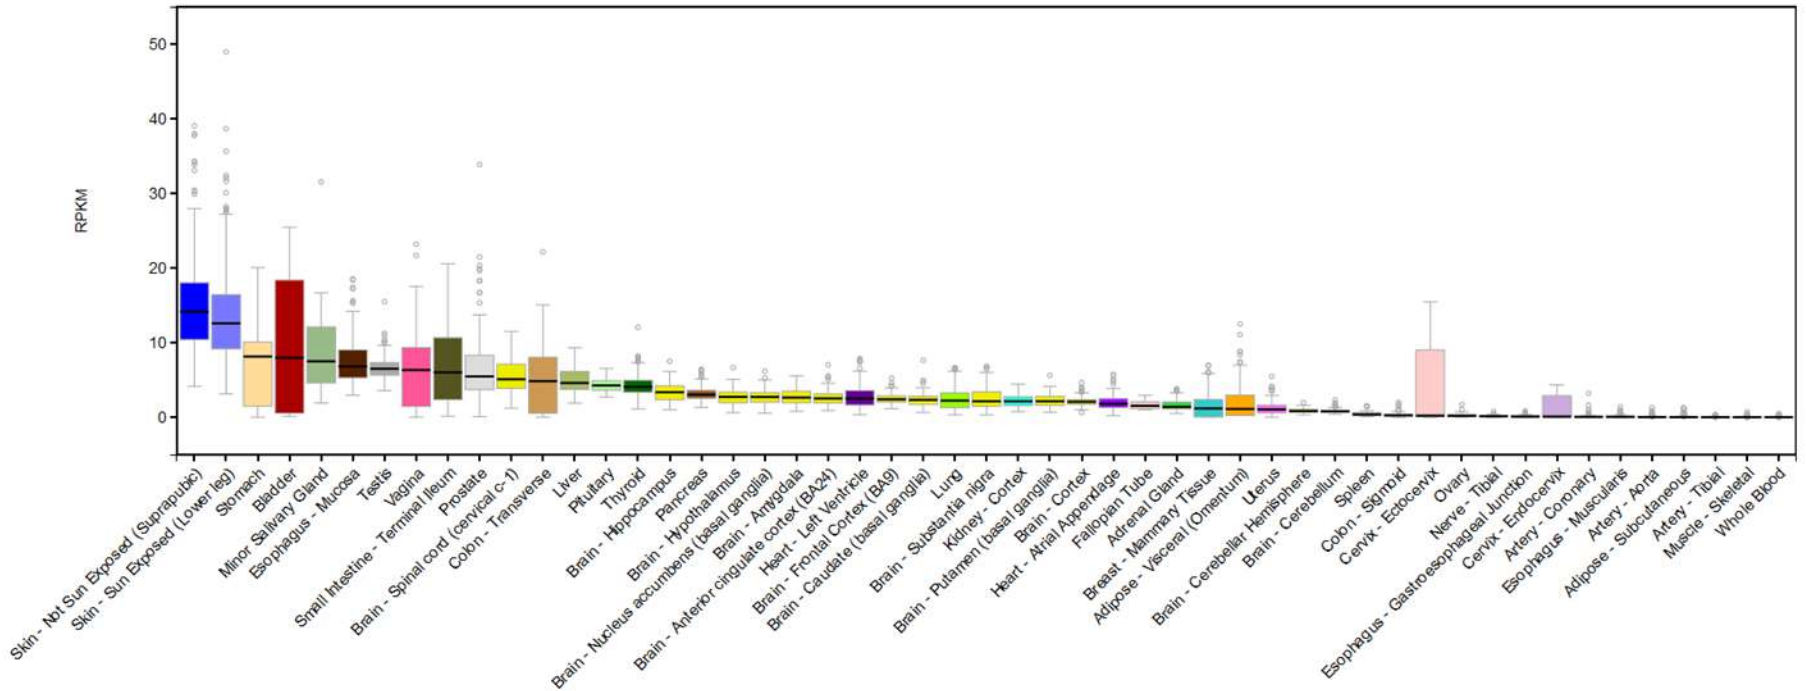

# FMOD

Median RPKM of highest tissue: 267.458

Plot:  Gene  Isoform

Differentiation:  None  Gender

Scale:  Log  Linear

Sort: ABC ▲ ▼

Outliers:  On  Off

Display:  Boxes  Medians

Filter:

FMOD Gene Expression

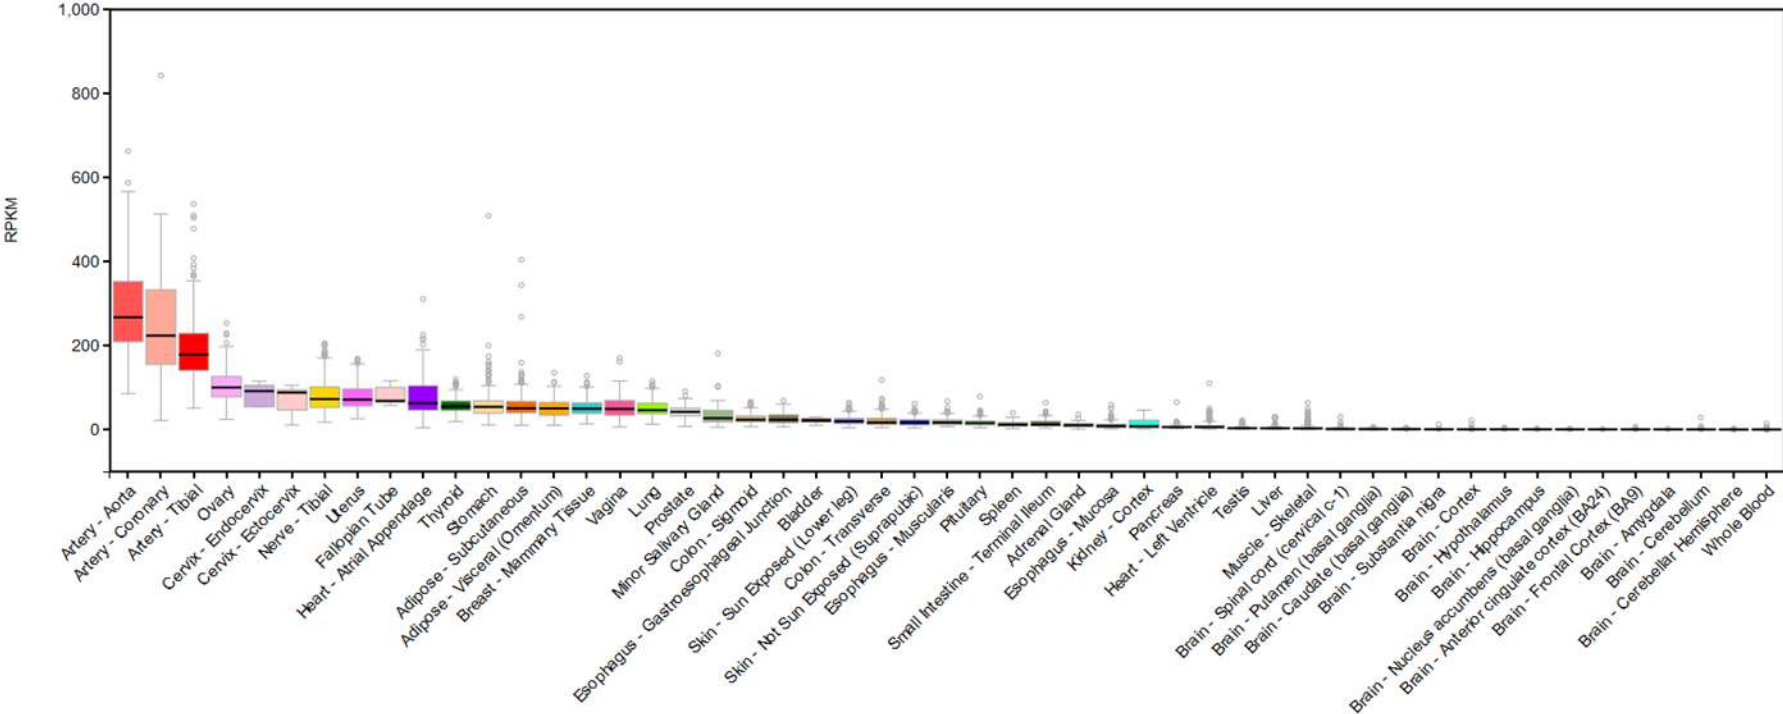

# DBN1

Median RPKM of highest tissue: 29.557

Plot:  Gene  Isoform

Differentiation:  None  Gender

Scale:  Log  Linear

Sort: ABC ▲ ▼

Outliers:  On  Off

Display:  Boxes  Medians

Filter:  Tissue

DBN1 Gene Expression

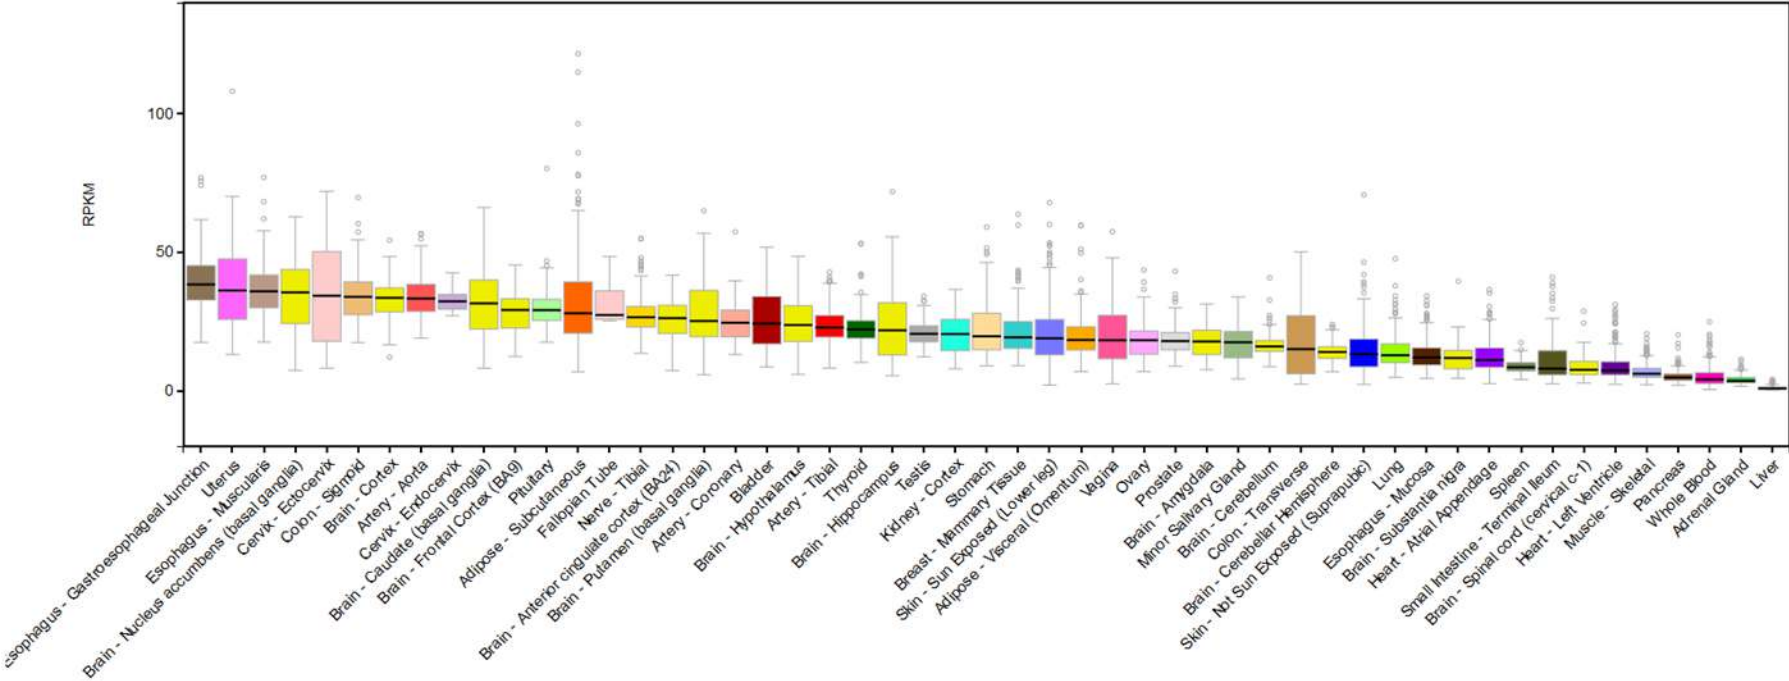

# DPPA2

Median RPKM of highest tissue: 2.787

Plot:  Gene  Isoform

Differentiation:  None  Gender

Scale:  Log  Linear

Sort: ABC ▲ ▼

Outliers:  On  Off

Display:  Boxes  Medians

Filter:

DPPA2 Gene Expression

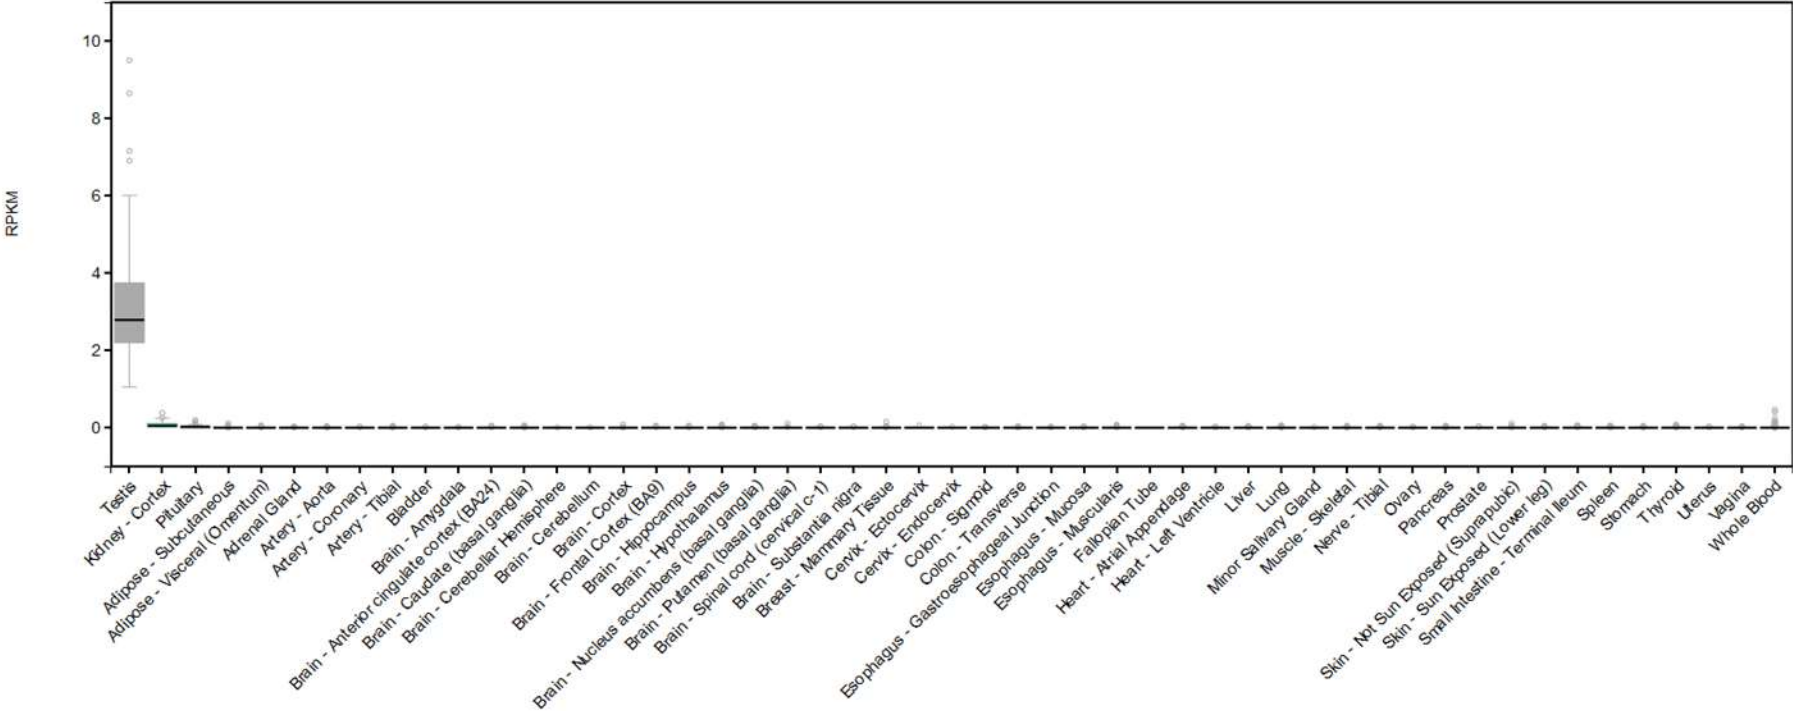

# NEO1

Median RPKM of highest tissue: 2.787

Plot:      Differentiation:      Scale:      Sort:       Outliers:      Display:      Filter:

NEO1 Gene Expression

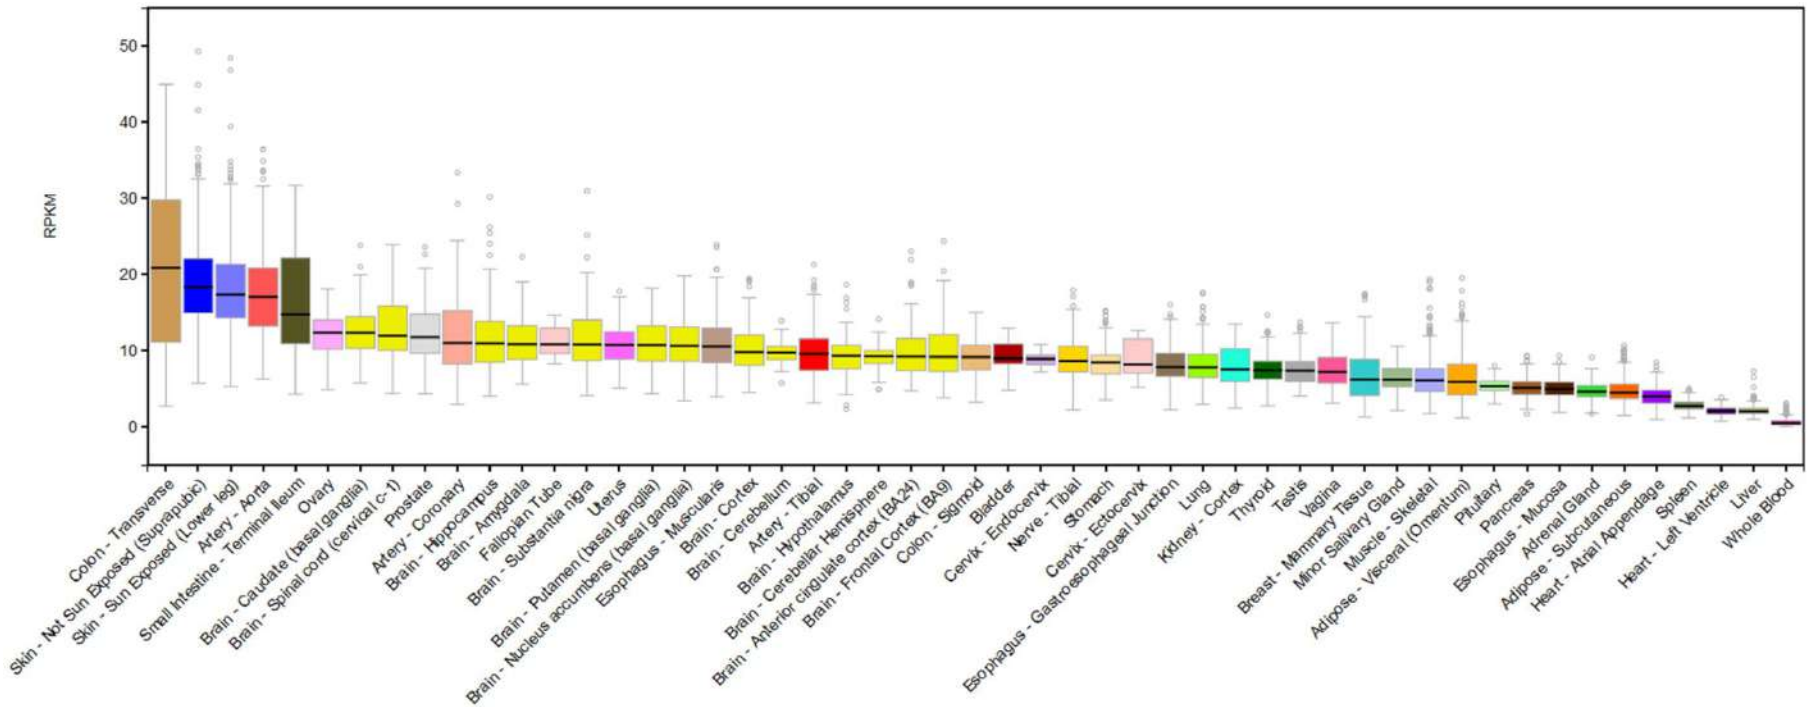



# CLSTN3

Median RPKM of highest tissue: 2.787

Plot:  Gene  Isoform

Differentiation:  None  Gender

Scale:  Log  Linear

Sort: ABC  ▲  ▼

Outliers:  On  Off

Display:  Boxes  Medians

Filter:

CLSTN3 Gene Expression

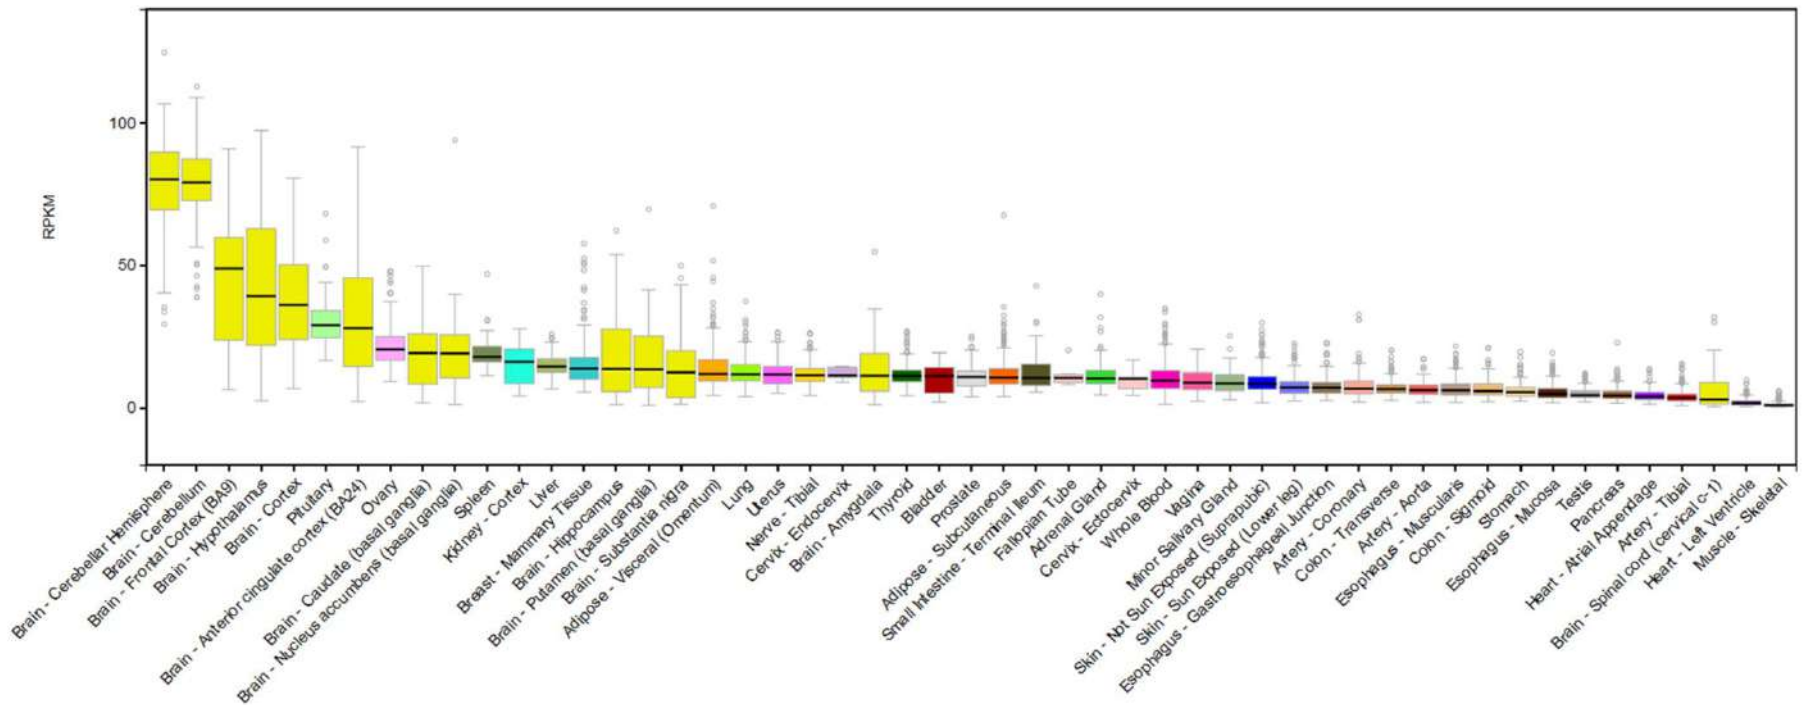

# CT-Antigens

# MAGEA8

Median RPKM of highest tissue: 1.342

Plot:  Gene  Isoform  
Differentiation:  None  Gender  
Scale:  Log  Linear  
Sort: ABC ▲ ▼  
Outliers:  On  Off  
Display:  Boxes  Medians  
Filter:

MAGEA8 Gene Expression

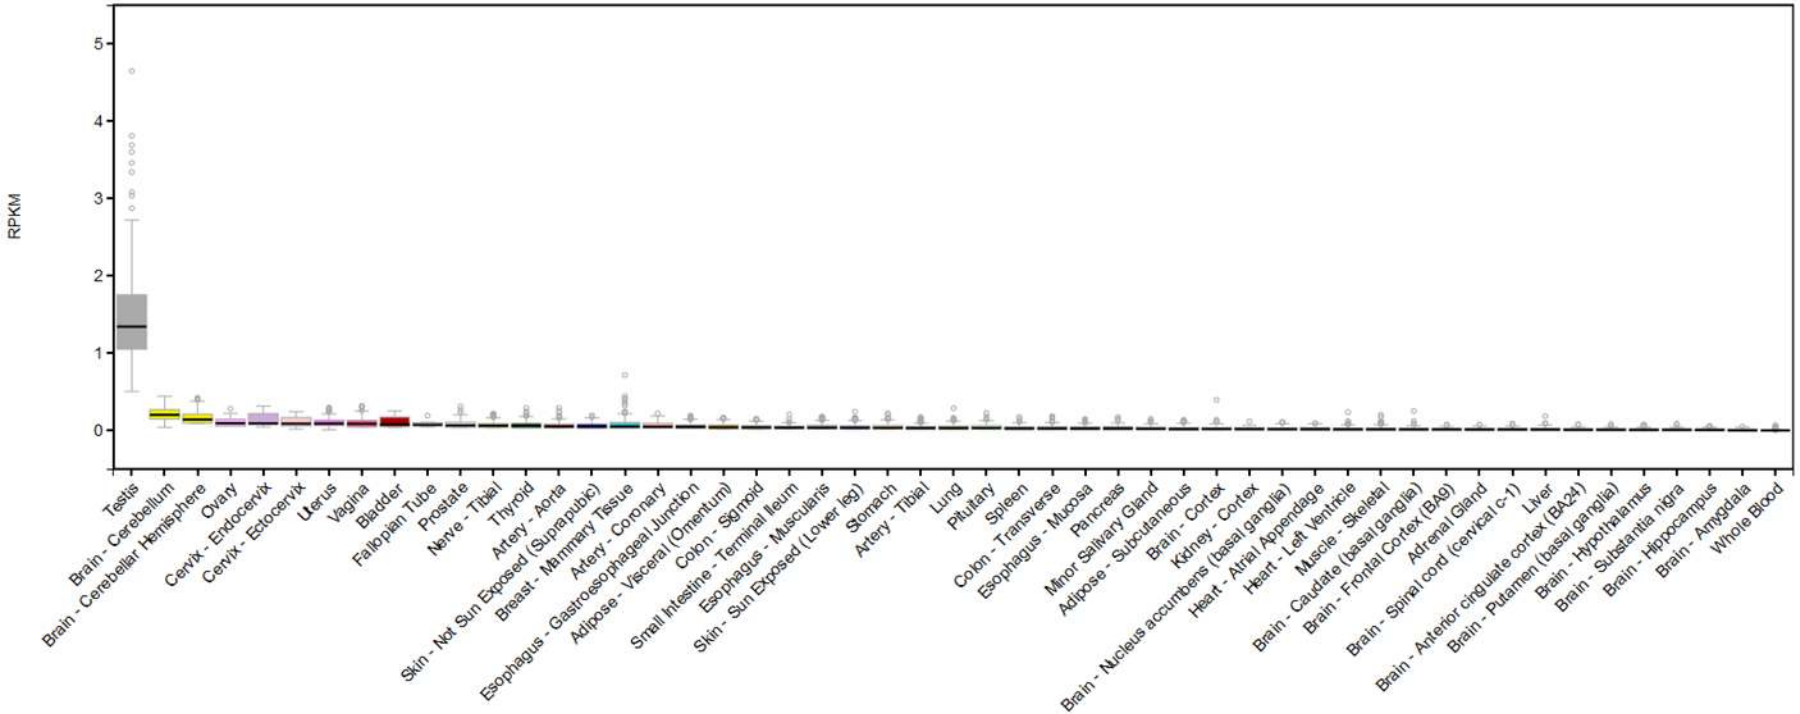

# MAGEA4

Median RPKM of highest tissue: 12.796

Plot:  Gene  Isoform

Differentiation:  None  Gender

Scale:  Log  Linear

Sort: ABC ▲ ▼

Outliers:  On  Off

Display:  Boxes  Medians

Filter:  Tissue

MAGEA4 Gene Expression

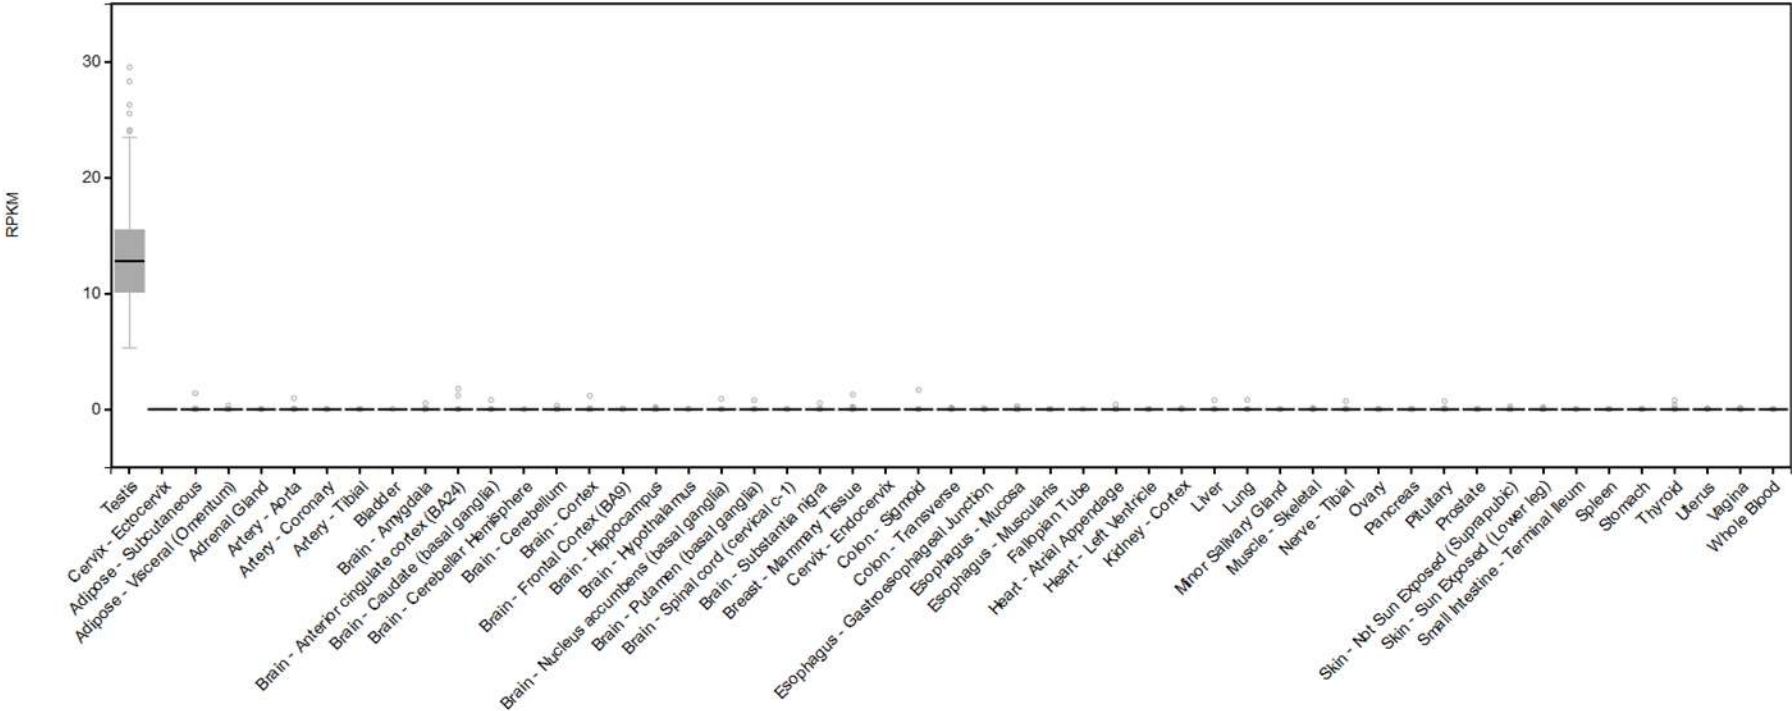



# MAGEB2

Median RPKM of highest tissue: 22.365

Plot:  Gene  Isoform

Differentiation:  None  Gender

Scale:  Log  Linear

Sort: ABC ▲ ▼

Outliers:  On  Off

Display:  Boxes  Medians

Filter:

MAGEB2 Gene Expression

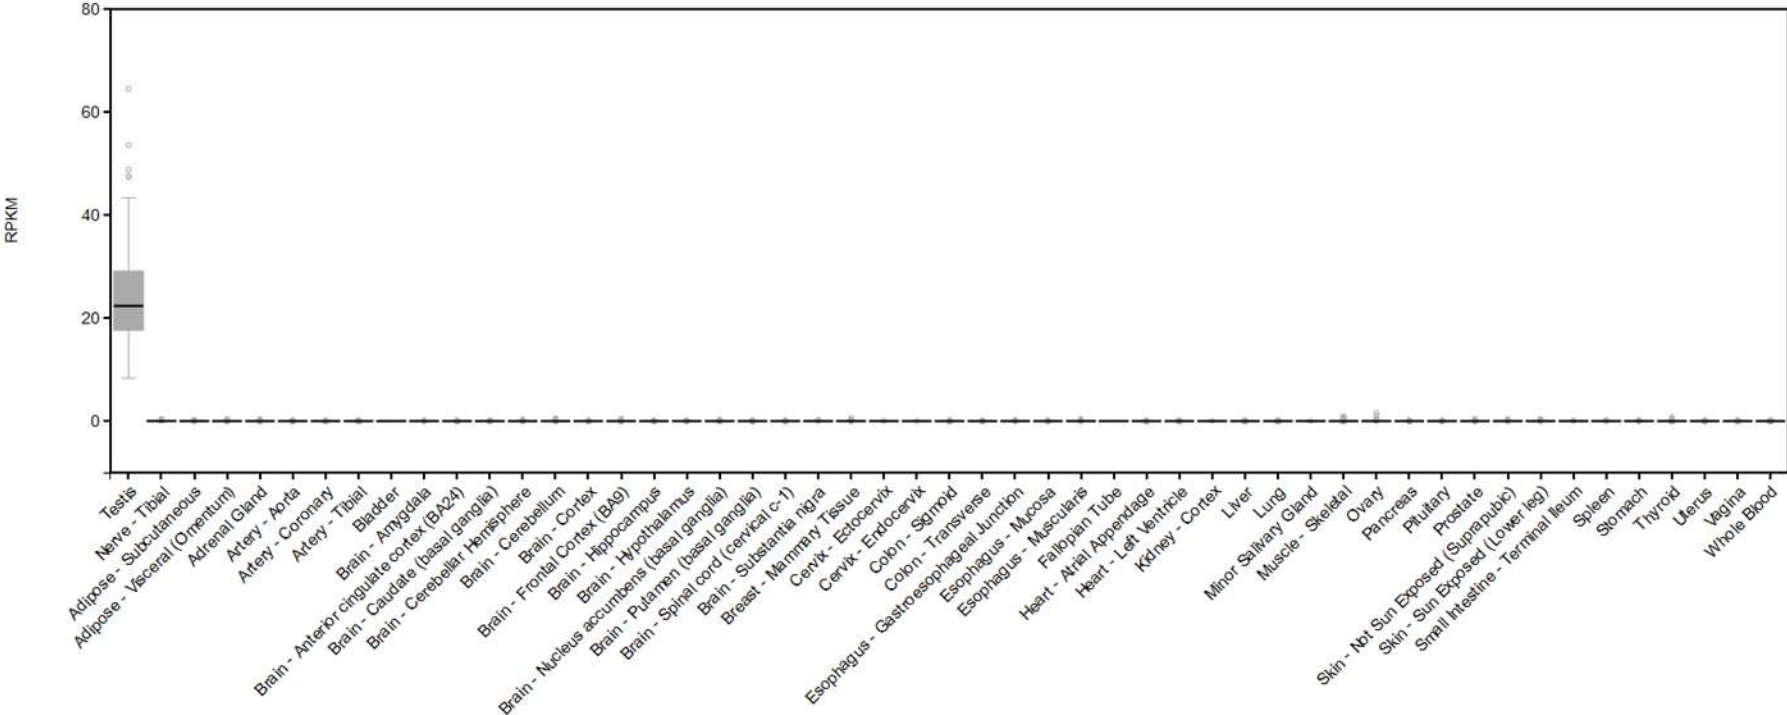



# MAGEB3

Median RPKM of highest tissue: 3.748

Plot:  Gene  Isoform  
Differentiation:  None  Gender  
Scale:  Log  Linear  
Sort: ABC ▲ ▼  
Outliers:  On  Off  
Display:  Boxes  Medians  
Filter:

MAGEB3 Gene Expression

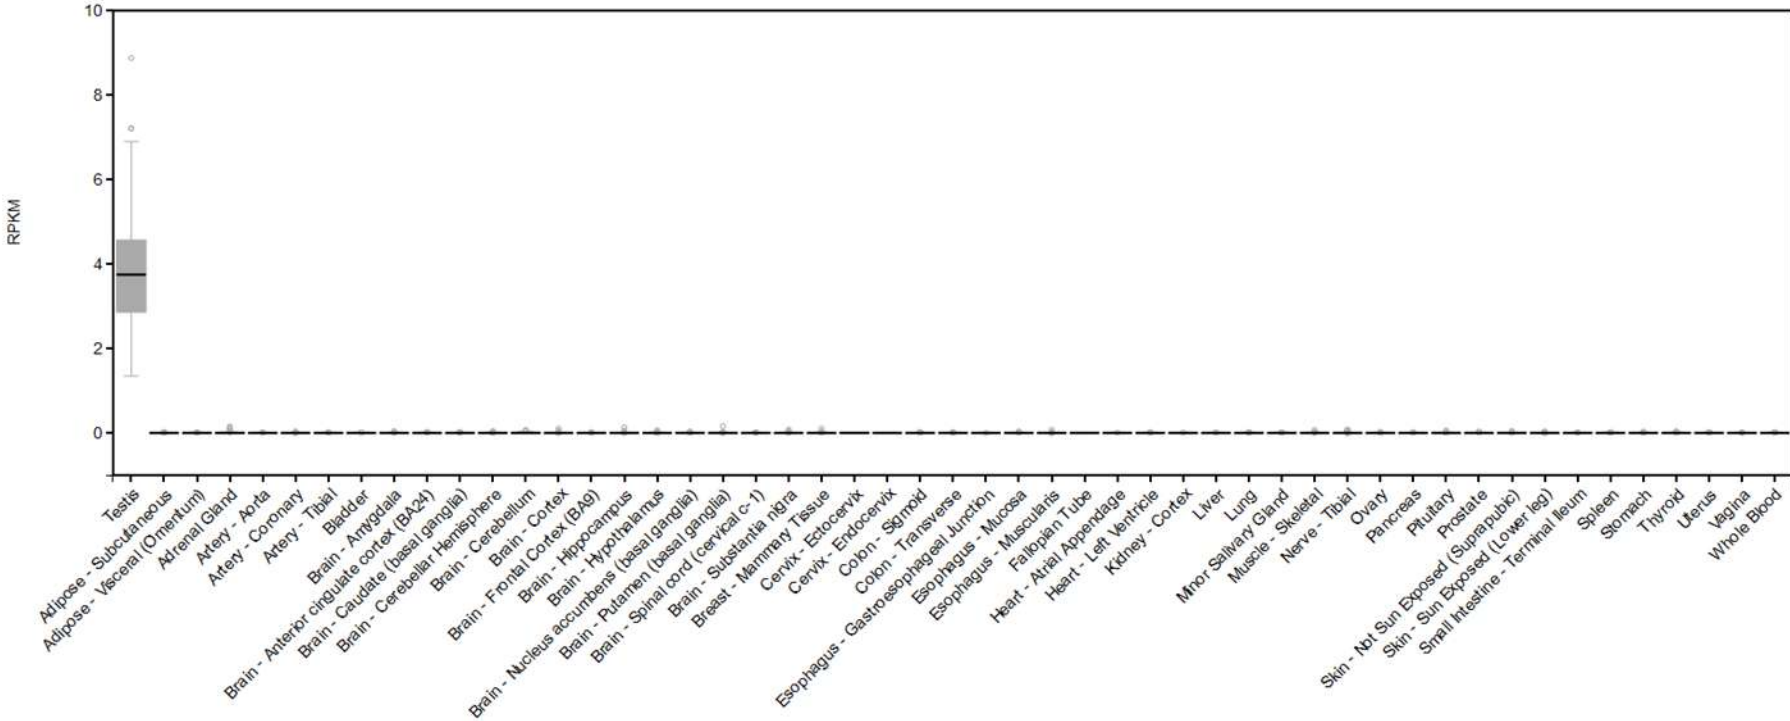

# MAGEC2

Median RPKM of highest tissue: 19.802

Plot:  Gene  Isoform

Differentiation:  None  Gender

Scale:  Log  Linear

Sort: ABC  ▲  ▼

Outliers:  On  Off

Display:  Boxes  Medians

Filter:  Tissue

MAGEC2 Gene Expression

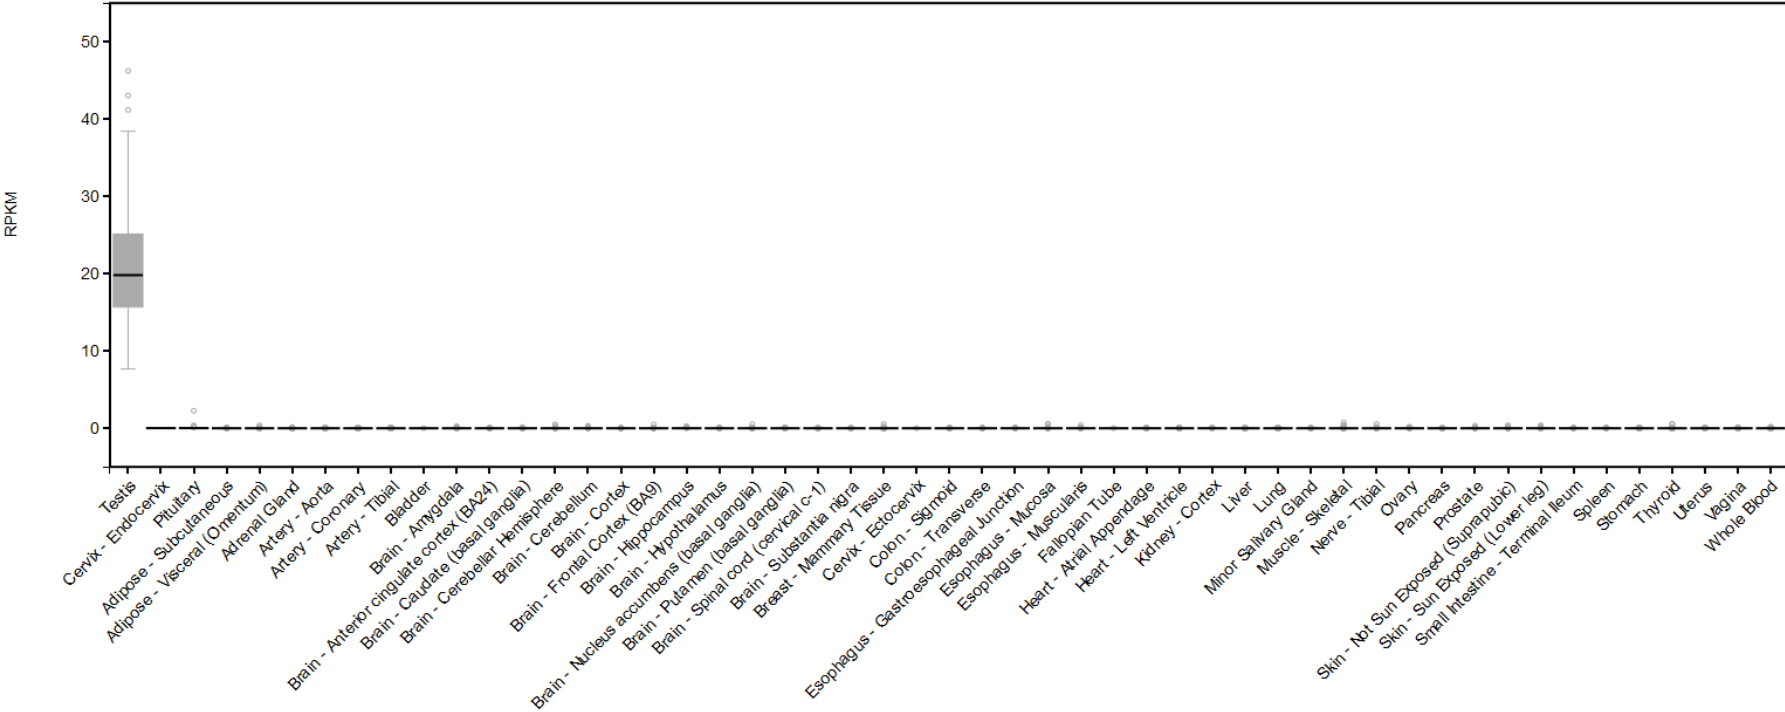

# MAGEC3

Median RPKM of highest tissue: 1.205

Plot:      Differentiation:      Scale:      Sort:       Outliers:      Display:      Filter:

MAGEC3 Gene Expression

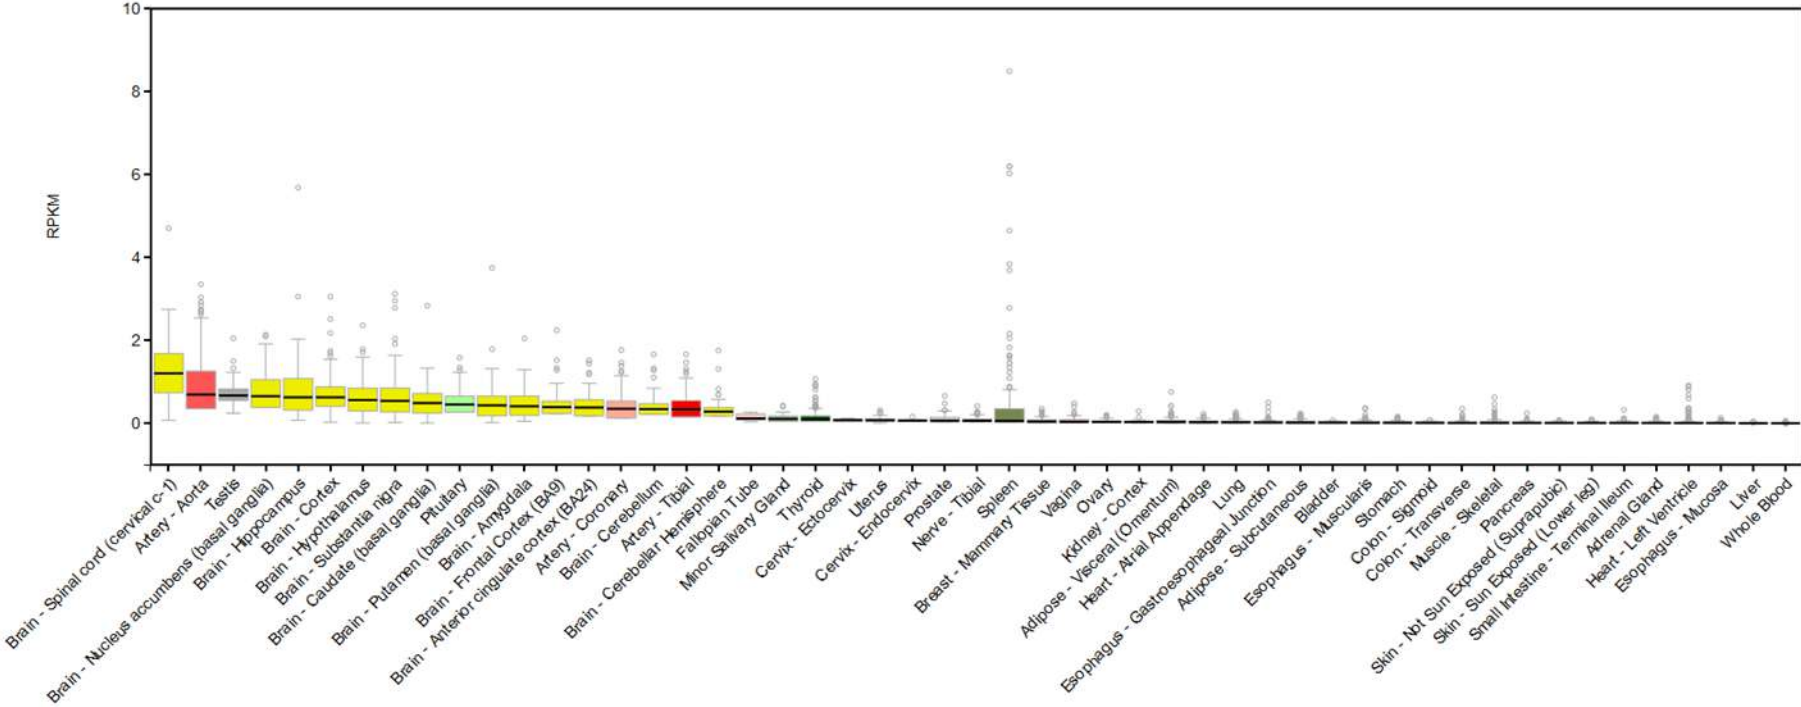

# SYCP1

Median RPKM of highest tissue: 21.327

Plot:      Differentiation:      Scale:      Sort:       Outliers:      Display:      Filter:

SYCP1 Gene Expression

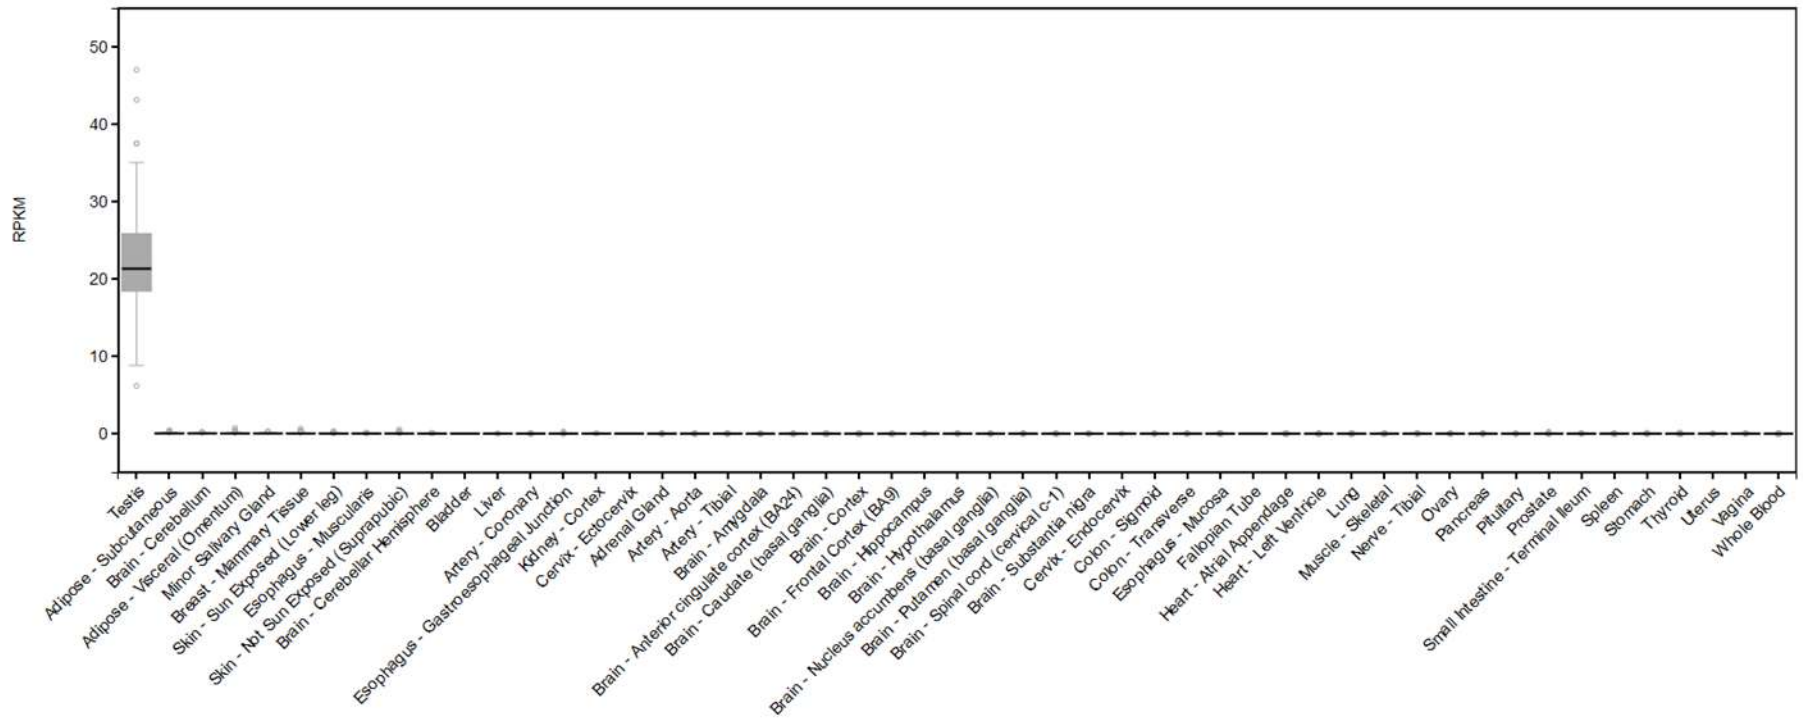

# SAGE1

Median RPKM of highest tissue: 3.650

Plot:  Gene  Isoform

Differentiation:  None  Gender

Scale:  Log  Linear

Sort: ABC ▲ ▼

Outliers:  On  Off

Display:  Boxes  Medians

Filter:

SAGE1 Gene Expression

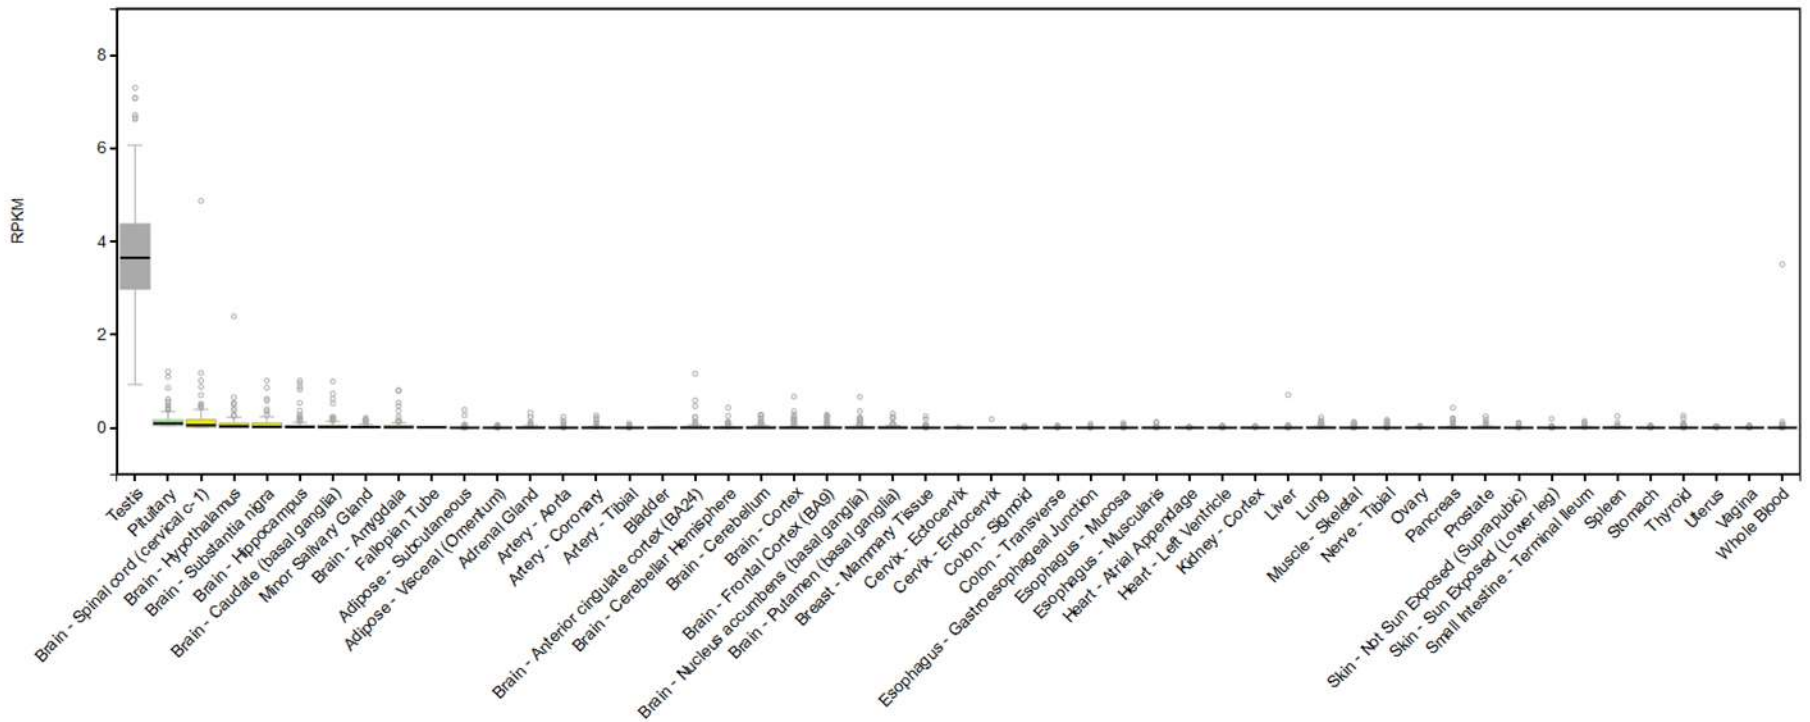

# PAGE2

Median RPKM of highest tissue: 15.273

Plot: Gene Isoform | Differentiation: None Gender | Scale: Log Linear | Sort: ABC ▲ ▼ | Outliers: On Off | Display: Boxes Medians | Filter: Tissue

PAGE2 Gene Expression

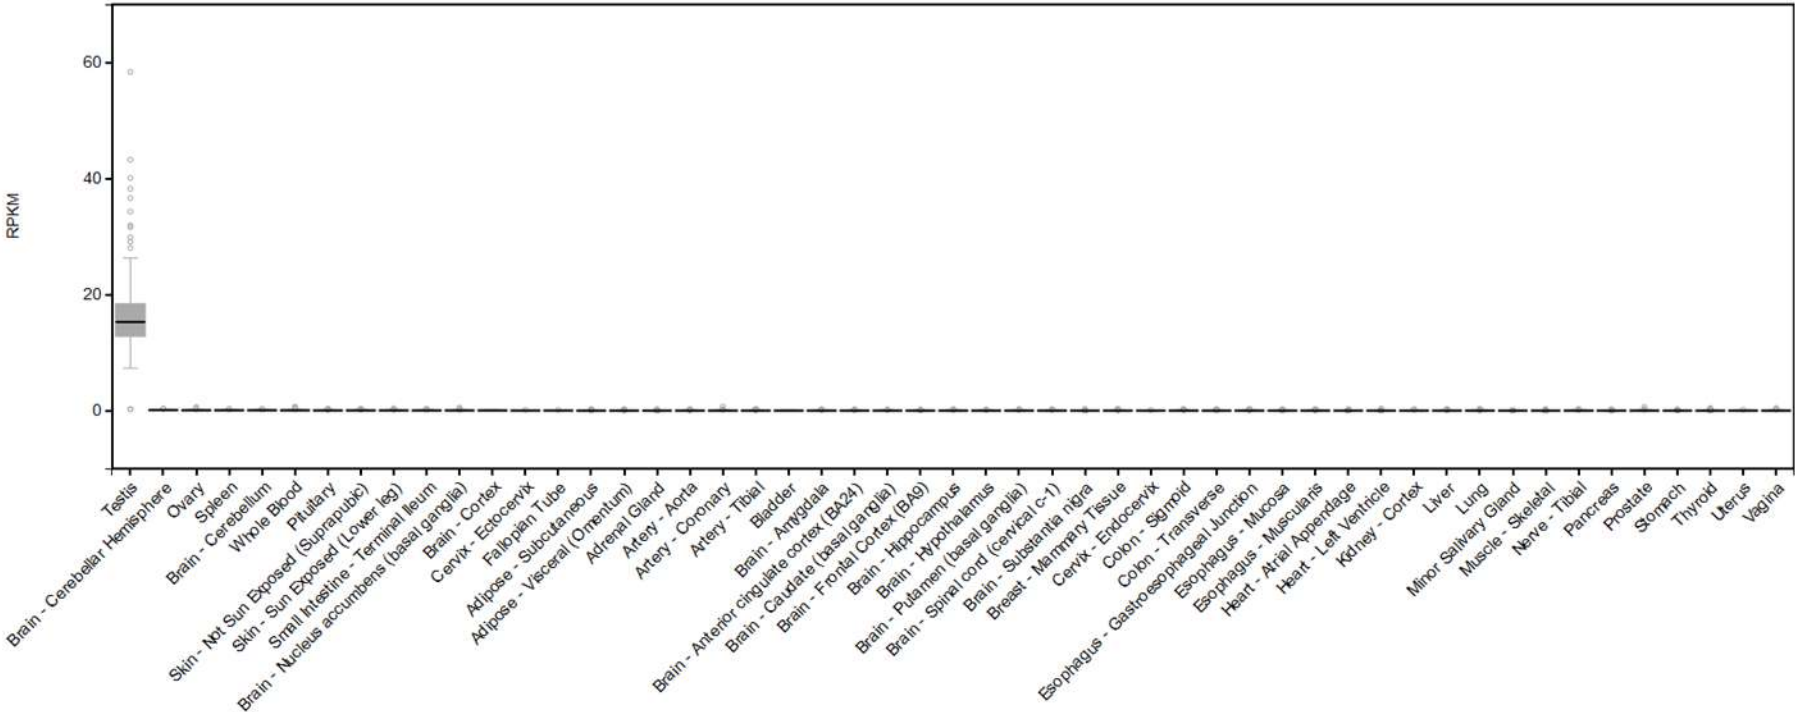



# CTAGE1

Median RPKM of highest tissue: 10.915

Plot:      Differentiation:      Scale:      Sort:       Outliers:      Display:      Filter:

CTAGE1 Gene Expression

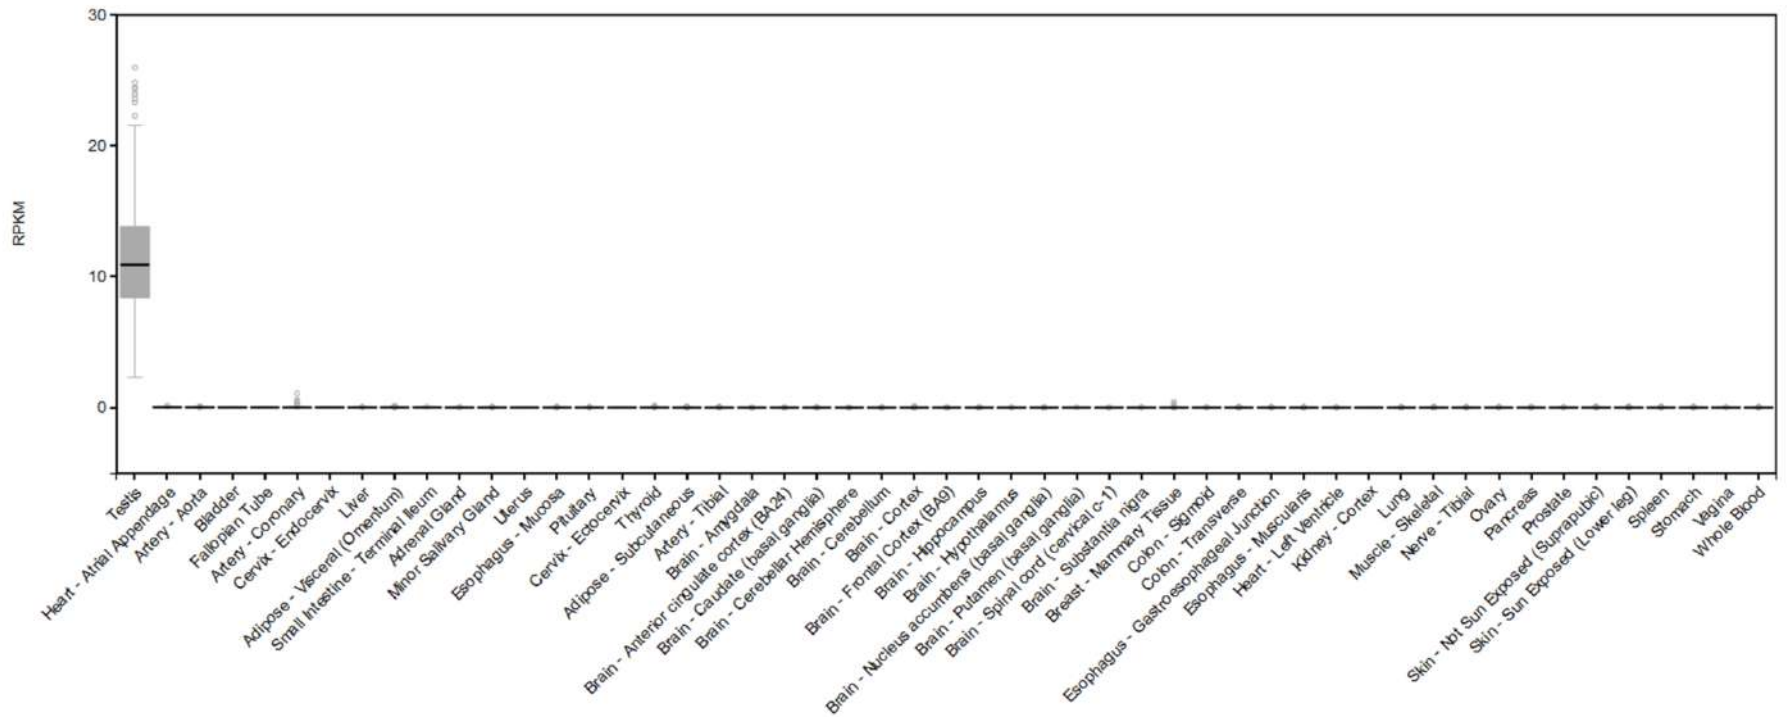

# CASC5

Median RPKM of highest tissue: 11.257

Plot:      Differentiation:      Scale:      Sort:  ▲ ▼    Outliers:      Display:      Filter:

CASC5 Gene Expression

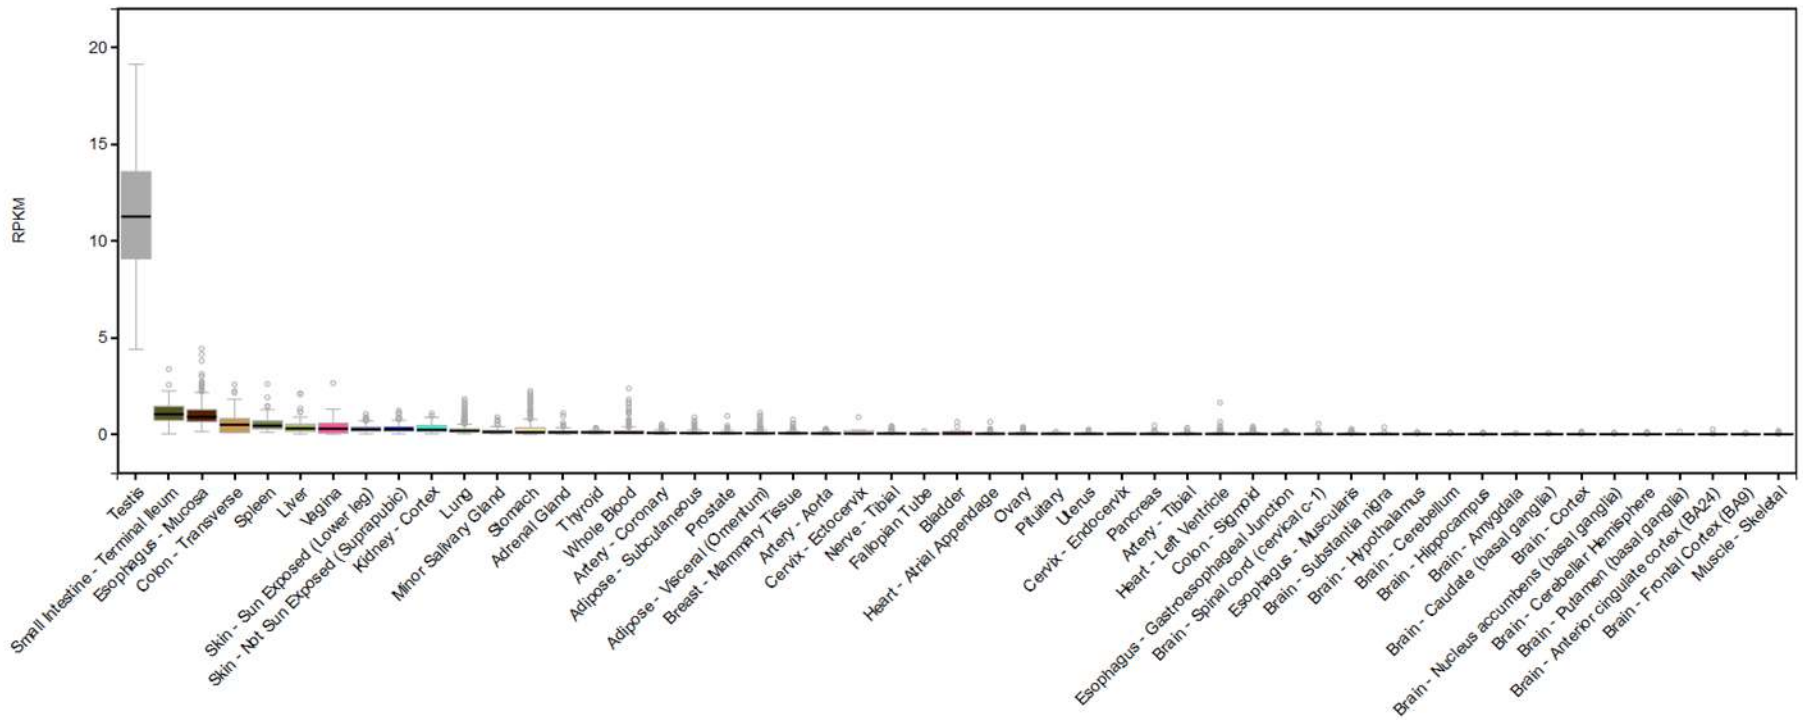

# FTHL17

Median RPKM of highest tissue: 3.579

Plot:  Gene  Isoform  
Differentiation:  None  Gender  
Scale:  Log  Linear  
Sort: ABC  ▲  ▼  
Outliers:  On  Off  
Display:  Boxes  Medians  
Filter:  Tissue

FTHL17 Gene Expression

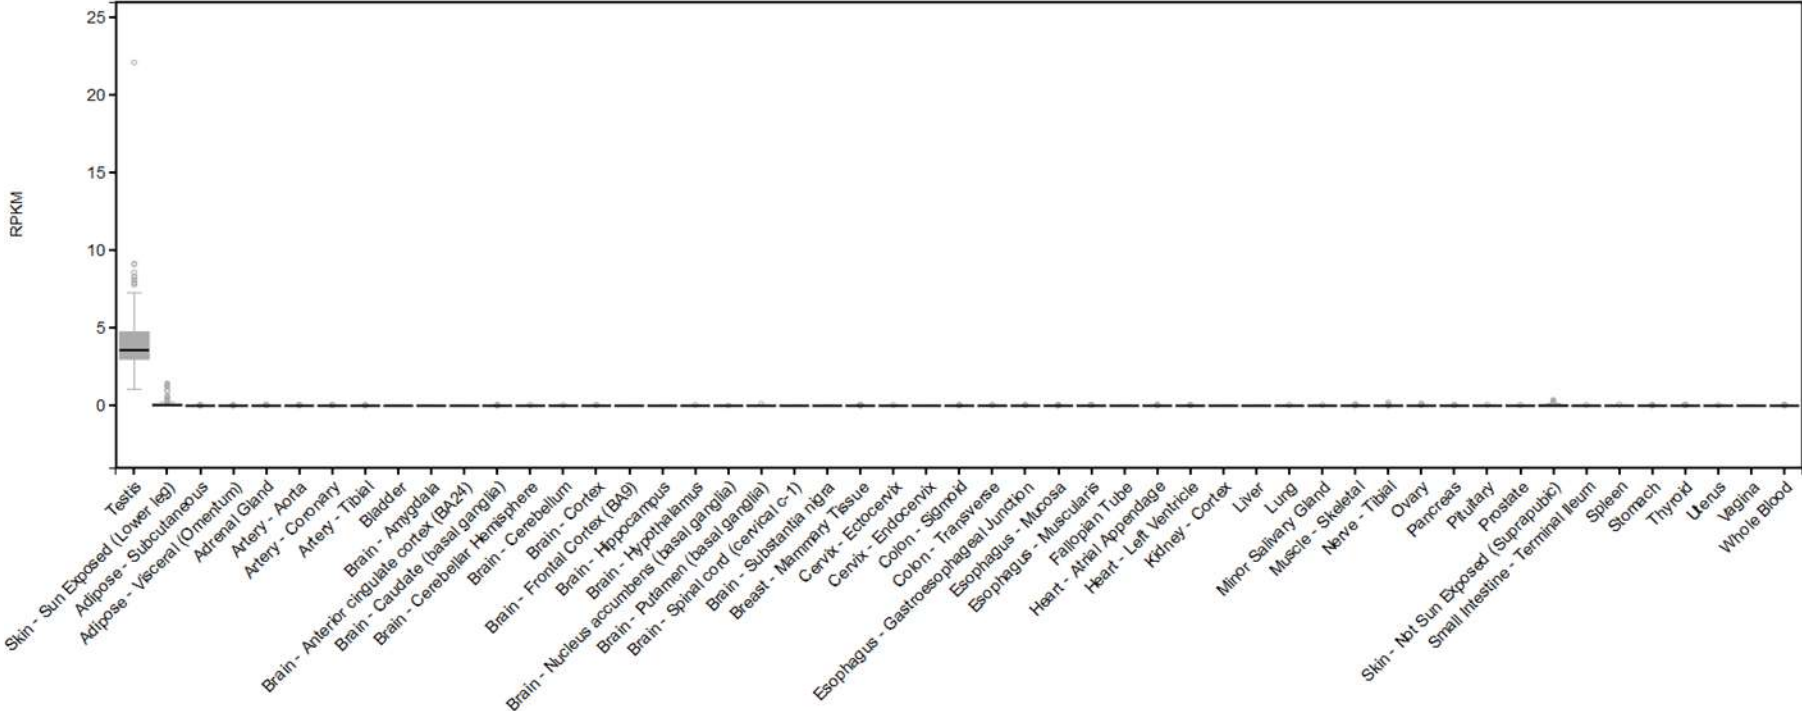

# TAF7L

Median RPKM of highest tissue: 27.584

Plot:  Gene  Isoform

Differentiation:  None  Gender

Scale:  Log  Linear

Sort: ABC ▲ ▼

Outliers:  On  Off

Display:  Boxes  Medians

Filter:  Tissue

TAF7L Gene Expression

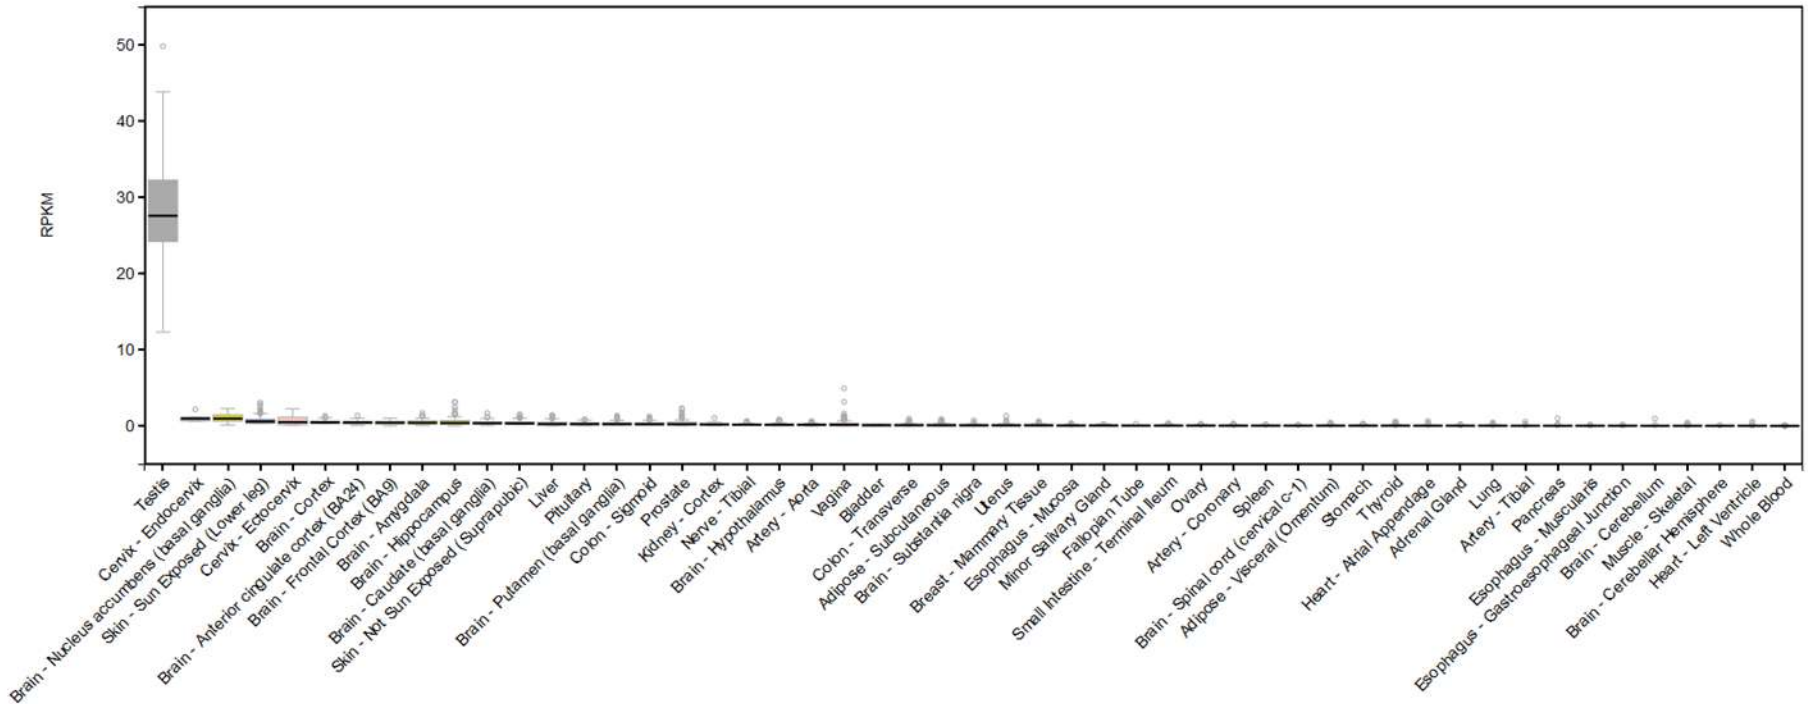

# TEX15

Median RPKM of highest tissue: 8.076

Plot:  Gene  Isoform

Differentiation:  None  Gender

Scale:  Log  Linear

Sort: ABC  ▲  ▼

Outliers:  On  Off

Display:  Boxes  Medians

Filter:

TEX15 Gene Expression

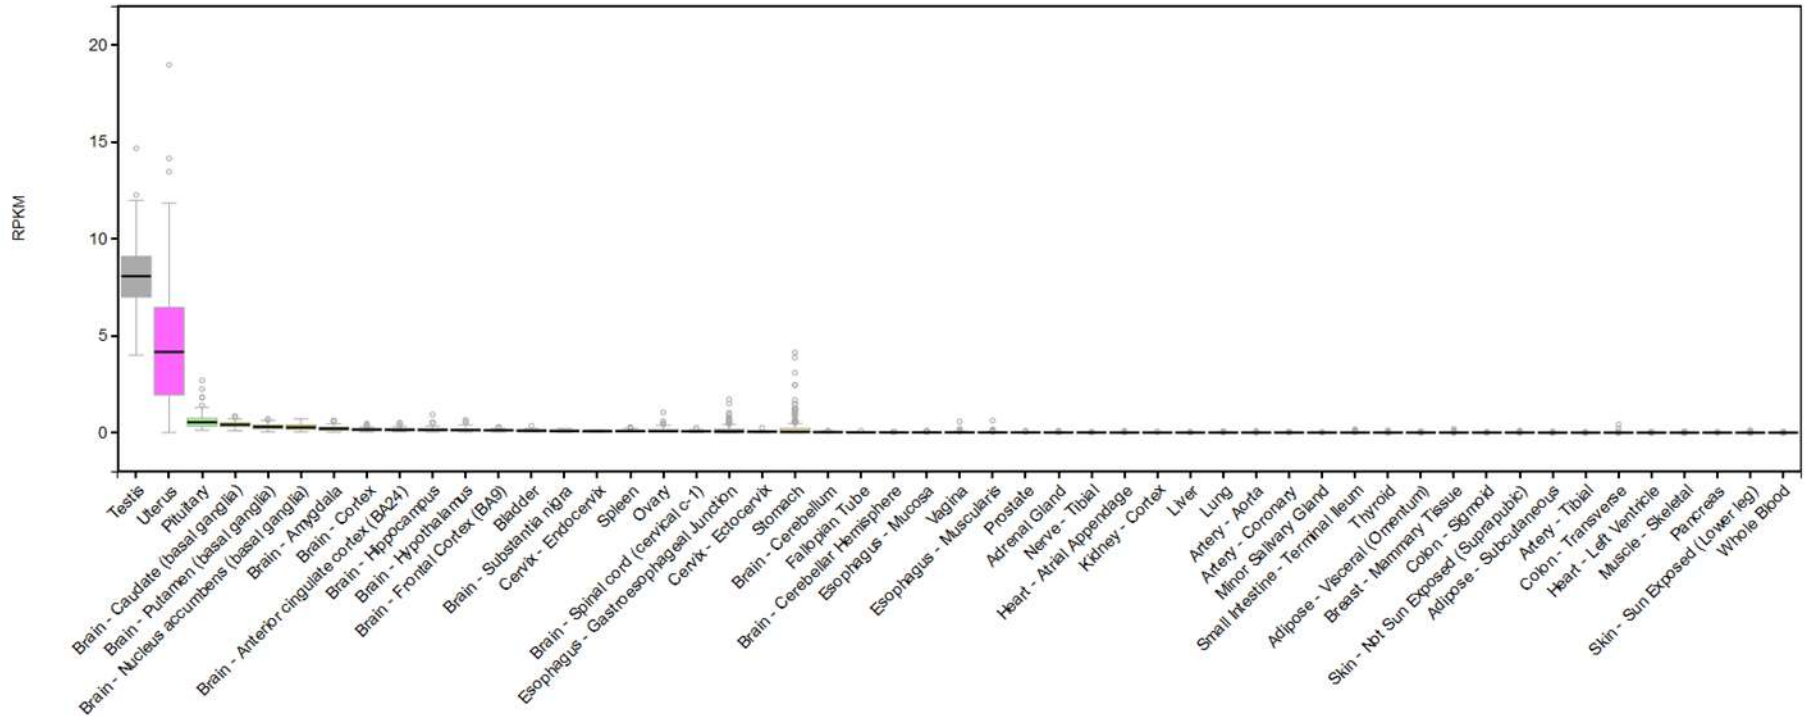

# CCDC110

Median RPKM of highest tissue: 50.294

Plot:  Gene  Isoform

Differentiation:  None  Gender

Scale:  Log  Linear

Sort: ABC  ▲  ▼

Outliers:  On  Off

Display:  Boxes  Medians

Filter:  Tissue

CCDC110 Gene Expression

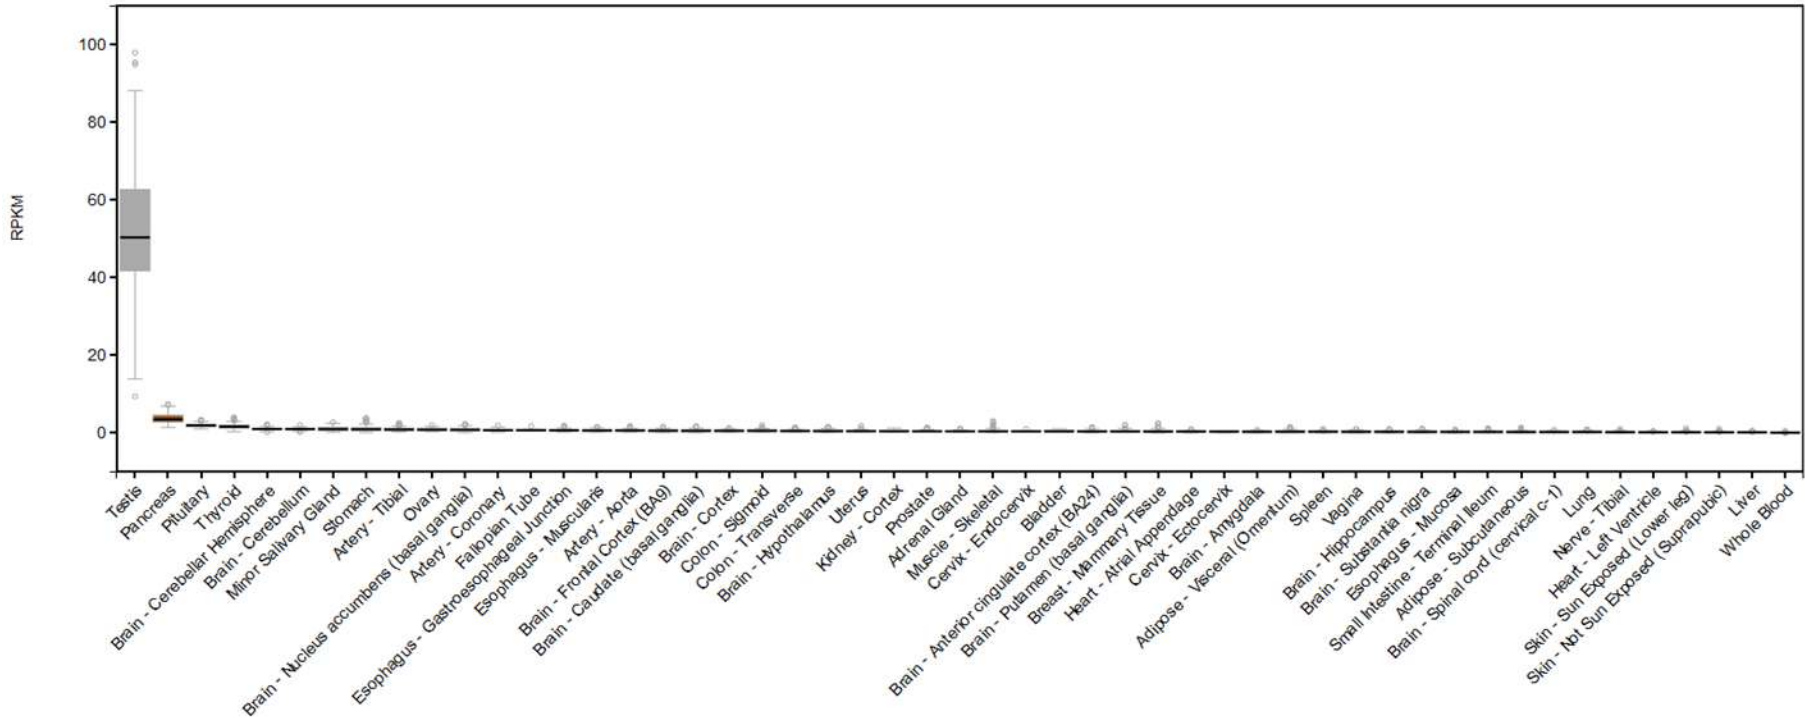



# TULP2

Median RPKM of highest tissue: 29.924

Plot:      Differentiation:      Scale:      Sort:       Outliers:      Display:      Filter:

TULP2 Gene Expression

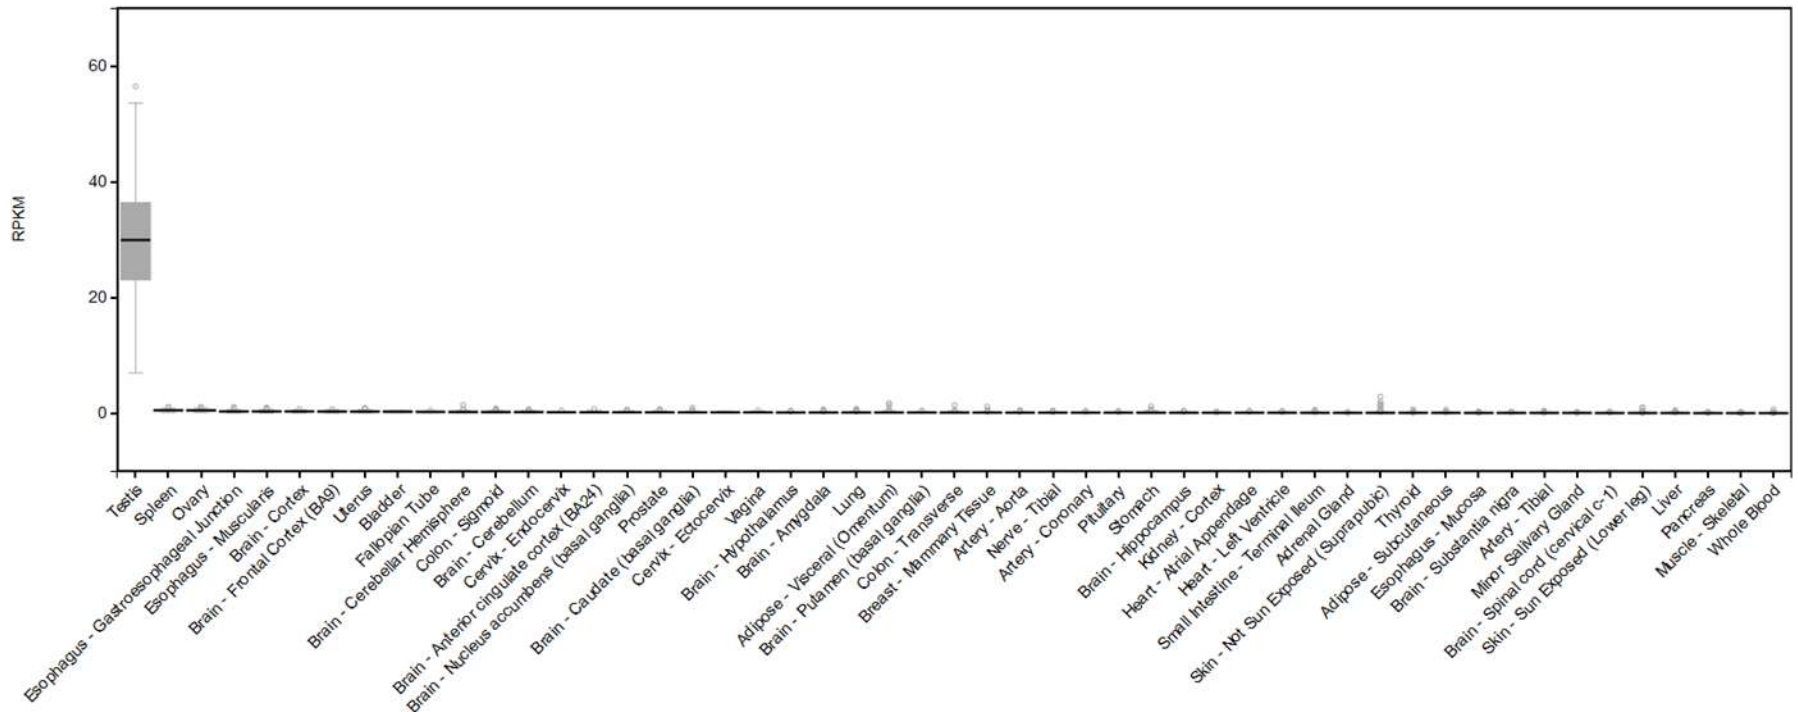

# CCDC36

Median RPKM of highest tissue: 19.182

Plot: Gene  Isoform   
Differentiation: None  Gender   
Scale: Log  Linear   
Sort: ABC  ▲  ▼   
Outliers: On  Off   
Display: Boxes  Medians   
Filter: Tissue

CCDC36 Gene Expression

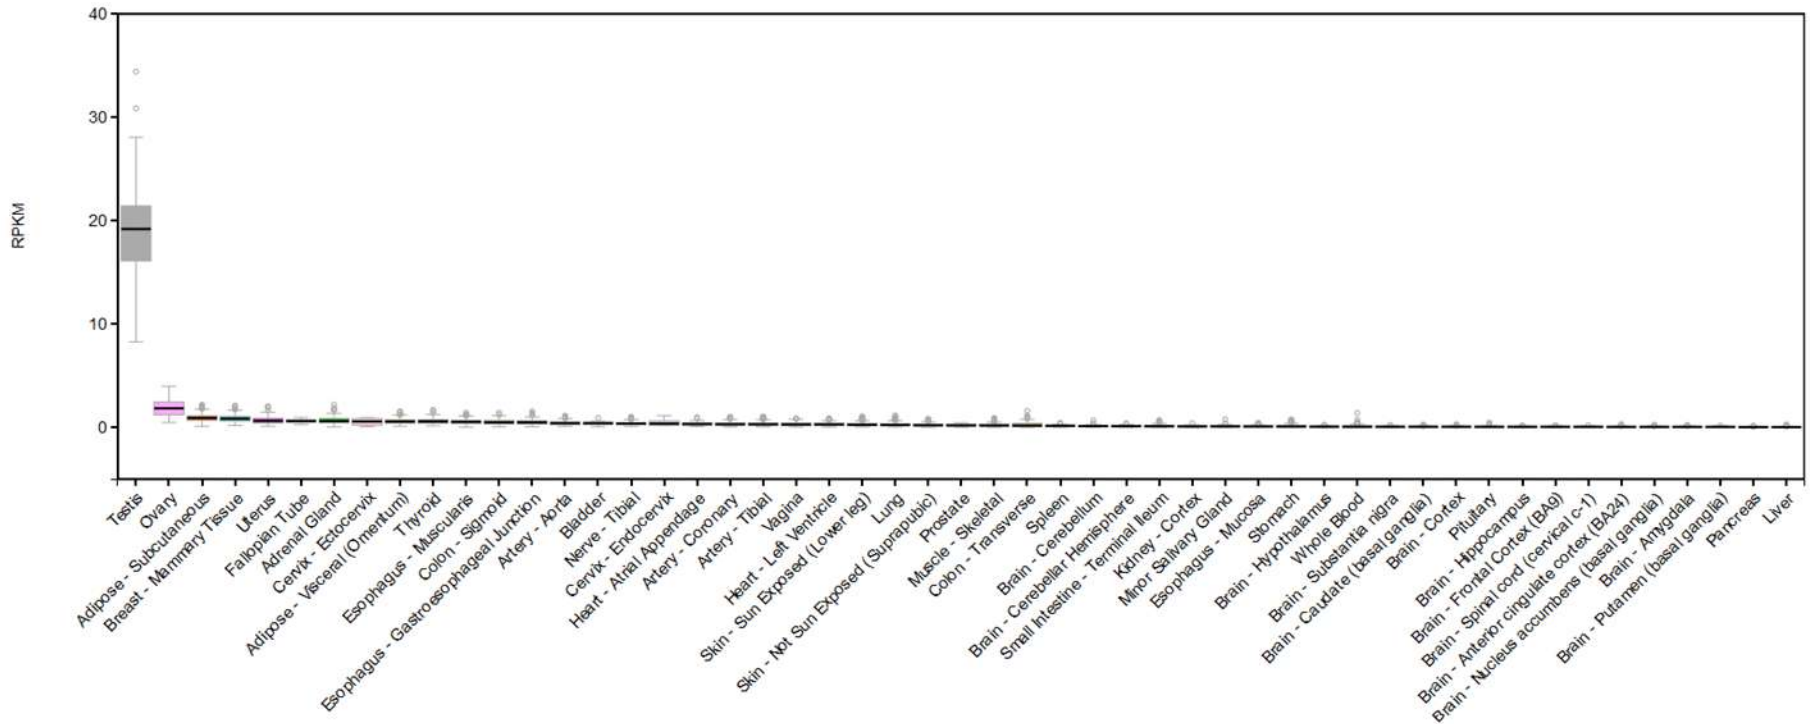

# SYCE1

Median RPKM of highest tissue: 84.477

Plot:  Gene  Isoform

Differentiation:  None  Gender

Scale:  Log  Linear

Sort: ABC  ▲  ▼

Outliers:  On  Off

Display:  Boxes  Medians

Filter:  Tissue

SYCE1 Gene Expression

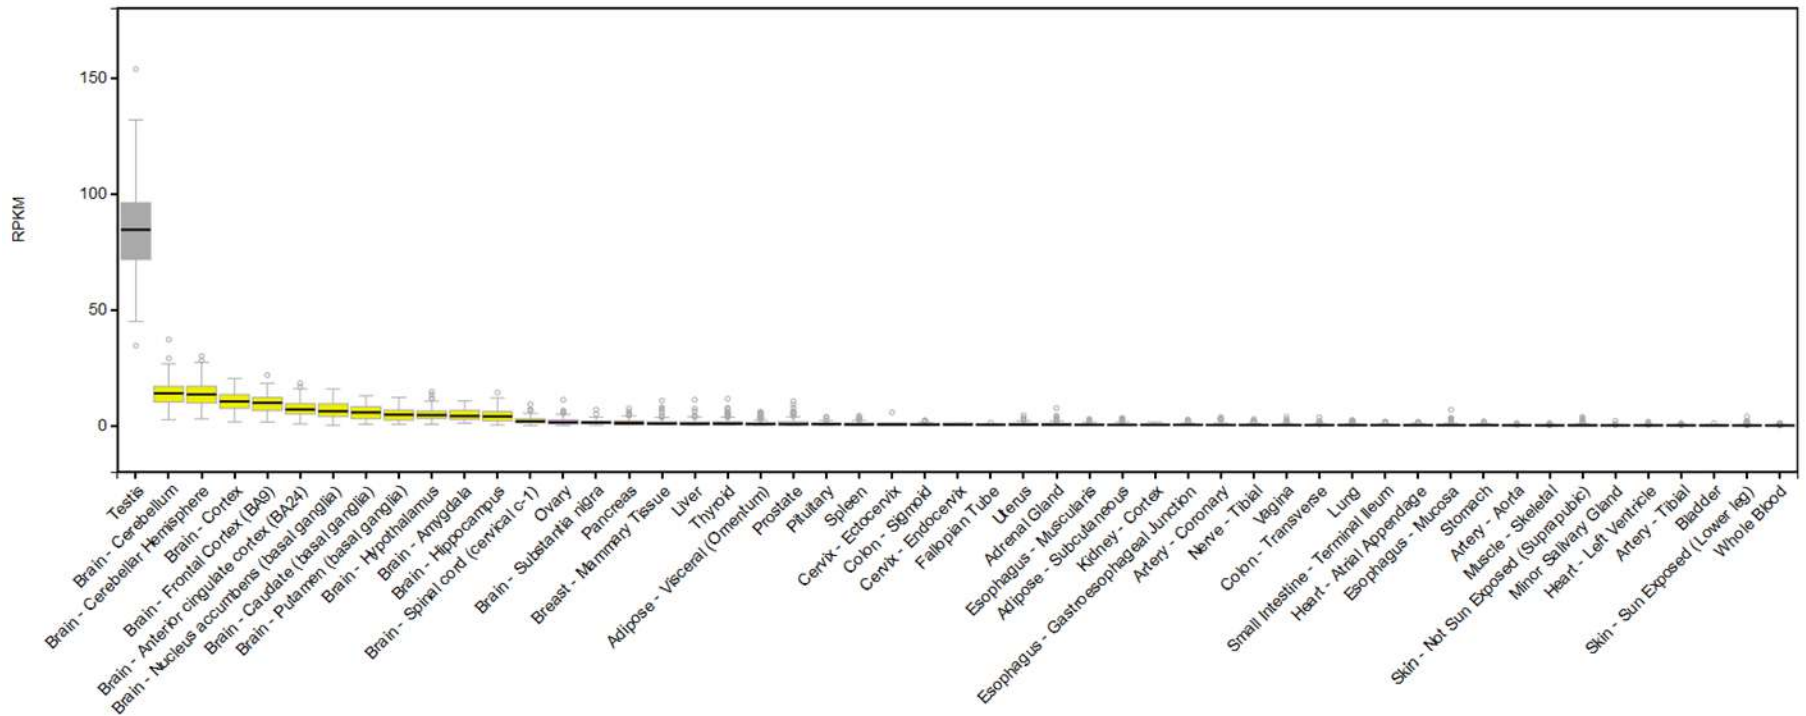

# CPXCR1

Median RPKM of highest tissue: 4.283

Plot:      Differentiation:      Scale:      Sort:       Outliers:      Display:      Filter:

CPXCR1 Gene Expression

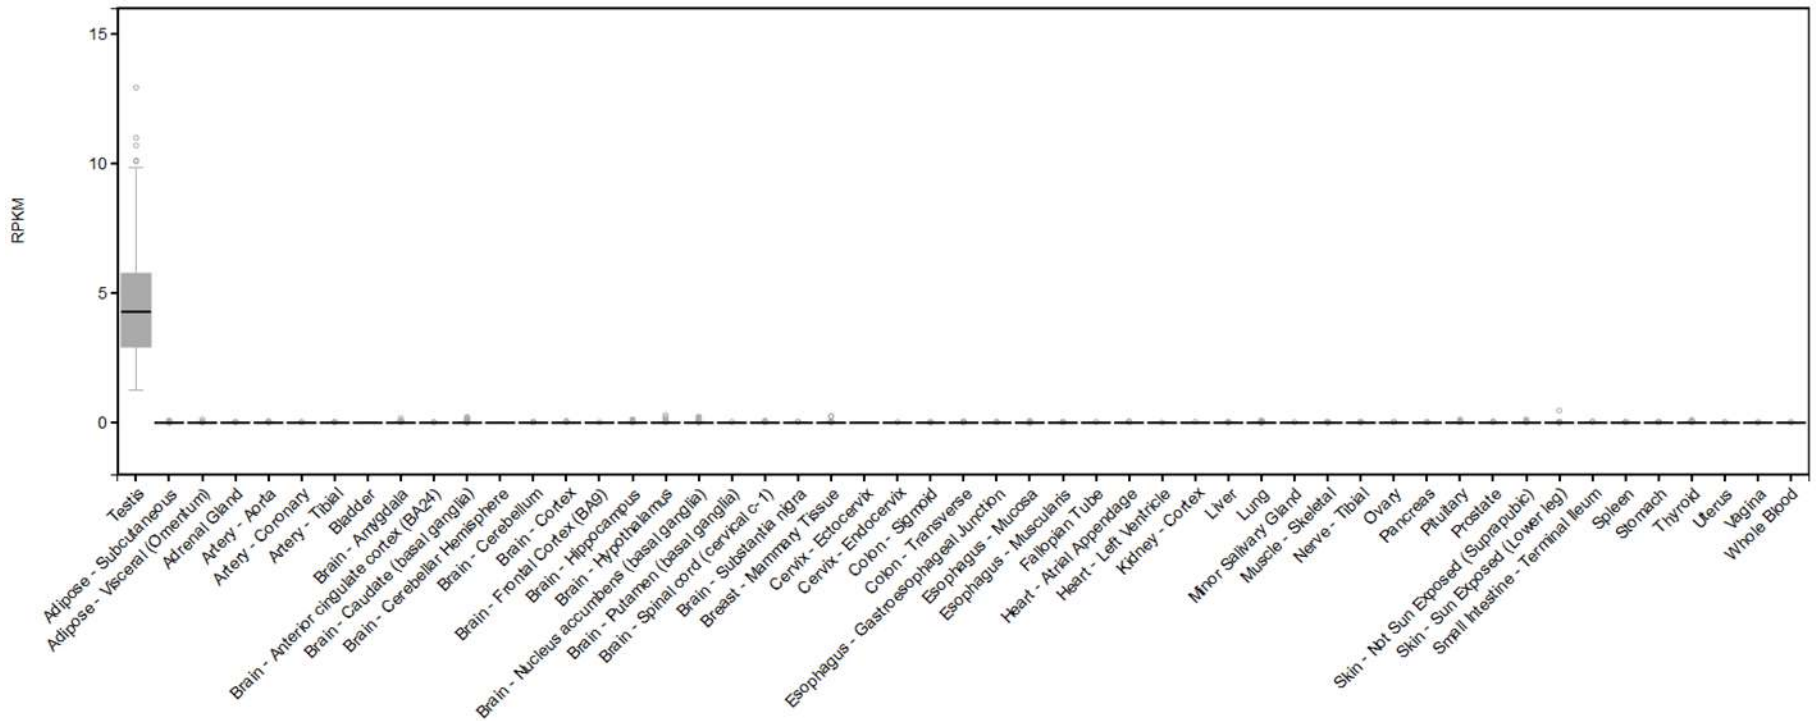

# TSGA10

Median RPKM of highest tissue: 22.745

Plot:  Gene  Isoform

Differentiation:  None  Gender

Scale:  Log  Linear

Sort: ABC  ▲  ▼

Outliers:  On  Off

Display:  Boxes  Medians

Filter:  Tissue

TSGA10 Gene Expression

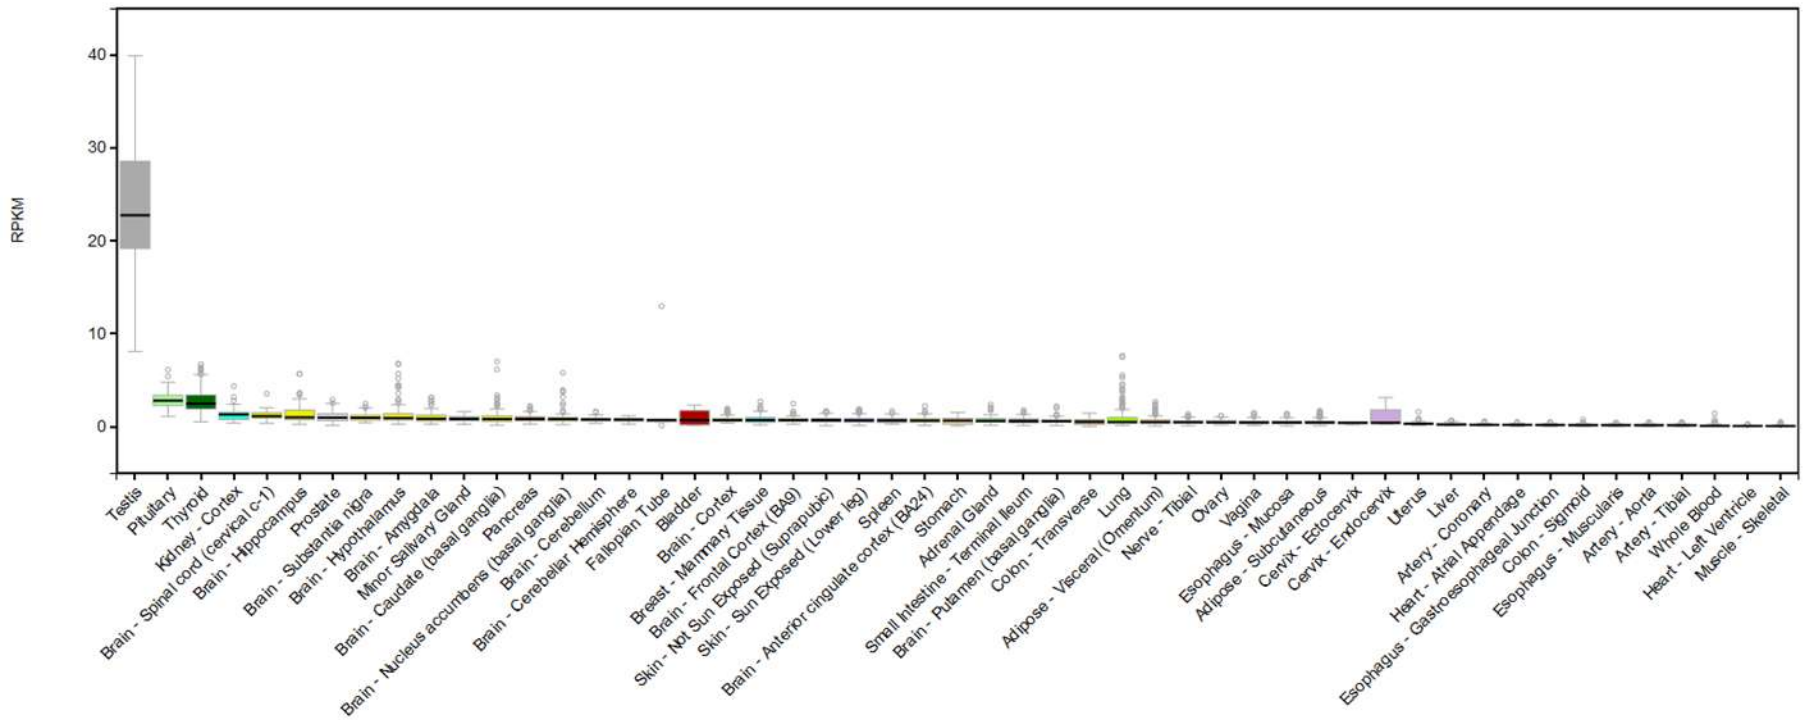

# ARMC3

Median RPKM of highest tissue: 15.217

Plot:  Gene  Isoform

Differentiation:  None  Gender

Scale:  Log  Linear

Sort: ABC ▲ ▼

Outliers:  On  Off

Display:  Boxes  Medians

Filter:

ARMC3 Gene Expression

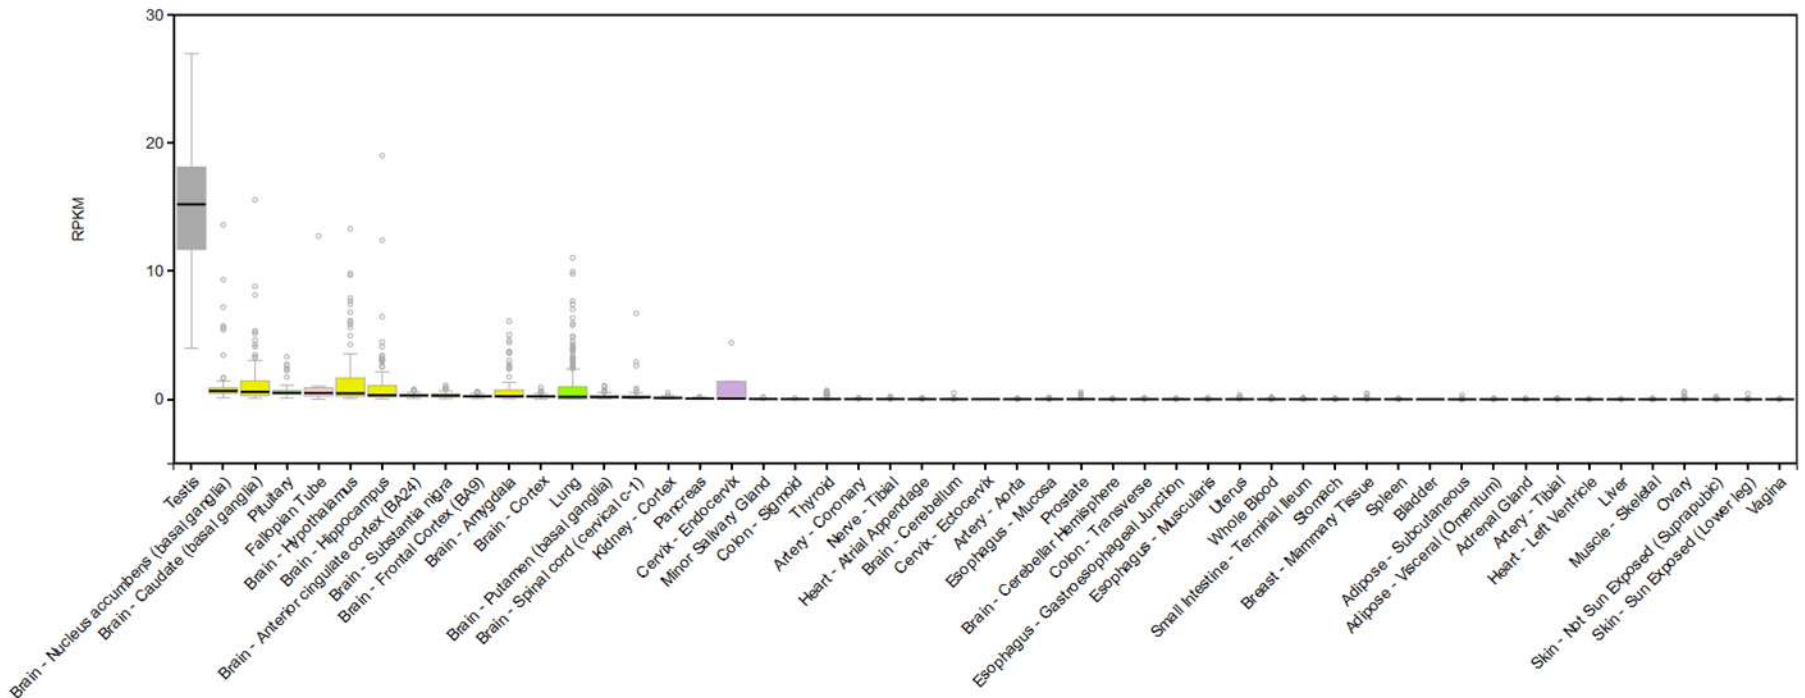



# PBK

Median RPKM of highest tissue: 37.475

Plot:  Gene  Isoform

Differentiation:  None  Gender

Scale:  Log  Linear

Sort: ABC ▲ ▼

Outliers:  On  Off

Display:  Boxes  Medians

Filter:

PBK Gene Expression

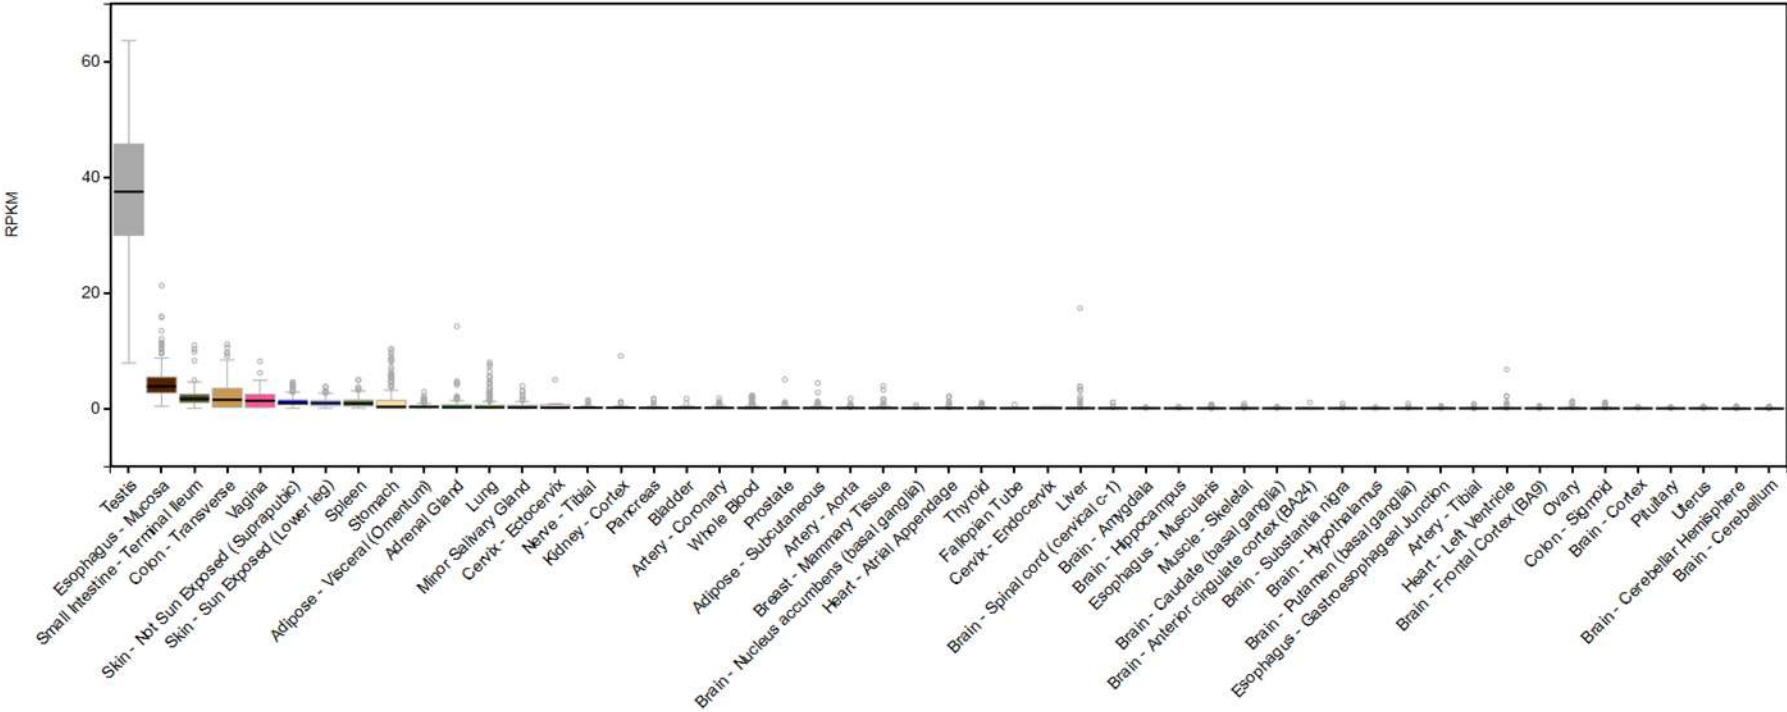

# CEP290

Median RPKM of highest tissue: 6.286

Plot:  Gene  Isoform

Differentiation:  None  Gender

Scale:  Log  Linear

Sort: ABC  ▲  ▼

Outliers:  On  Off

Display:  Boxes  Medians

Filter:  Tissue

CEP290 Gene Expression

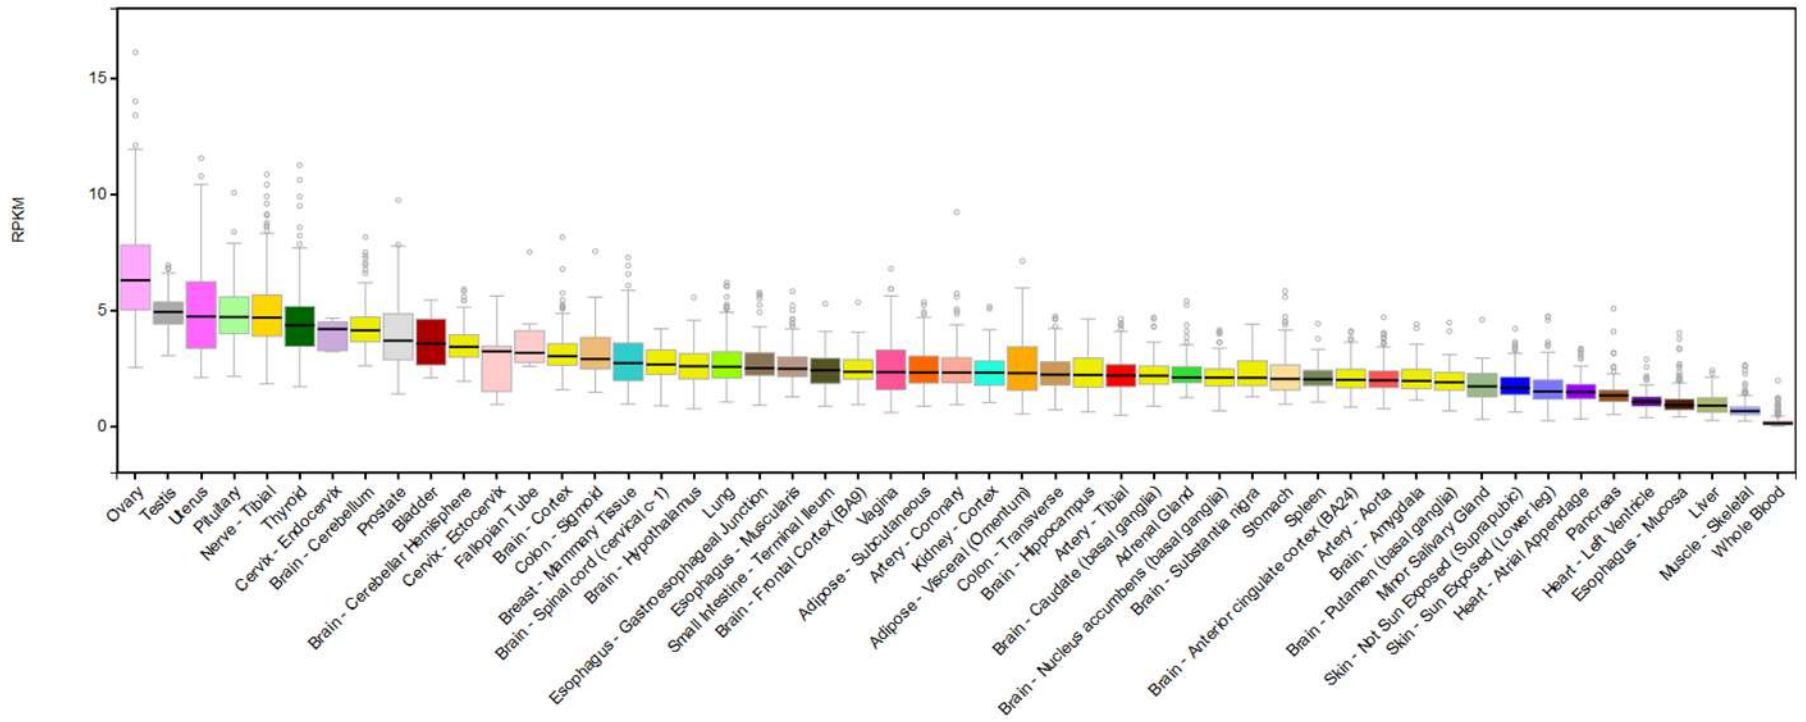

# SPAG9

Median RPKM of highest tissue: 31.019

Plot:  Gene  Isoform

Differentiation:  None  Gender

Scale:  Log  Linear

Sort: ABC  ▲  ▼

Outliers:  On  Off

Display:  Boxes  Medians

Filter:

SPAG9 Gene Expression

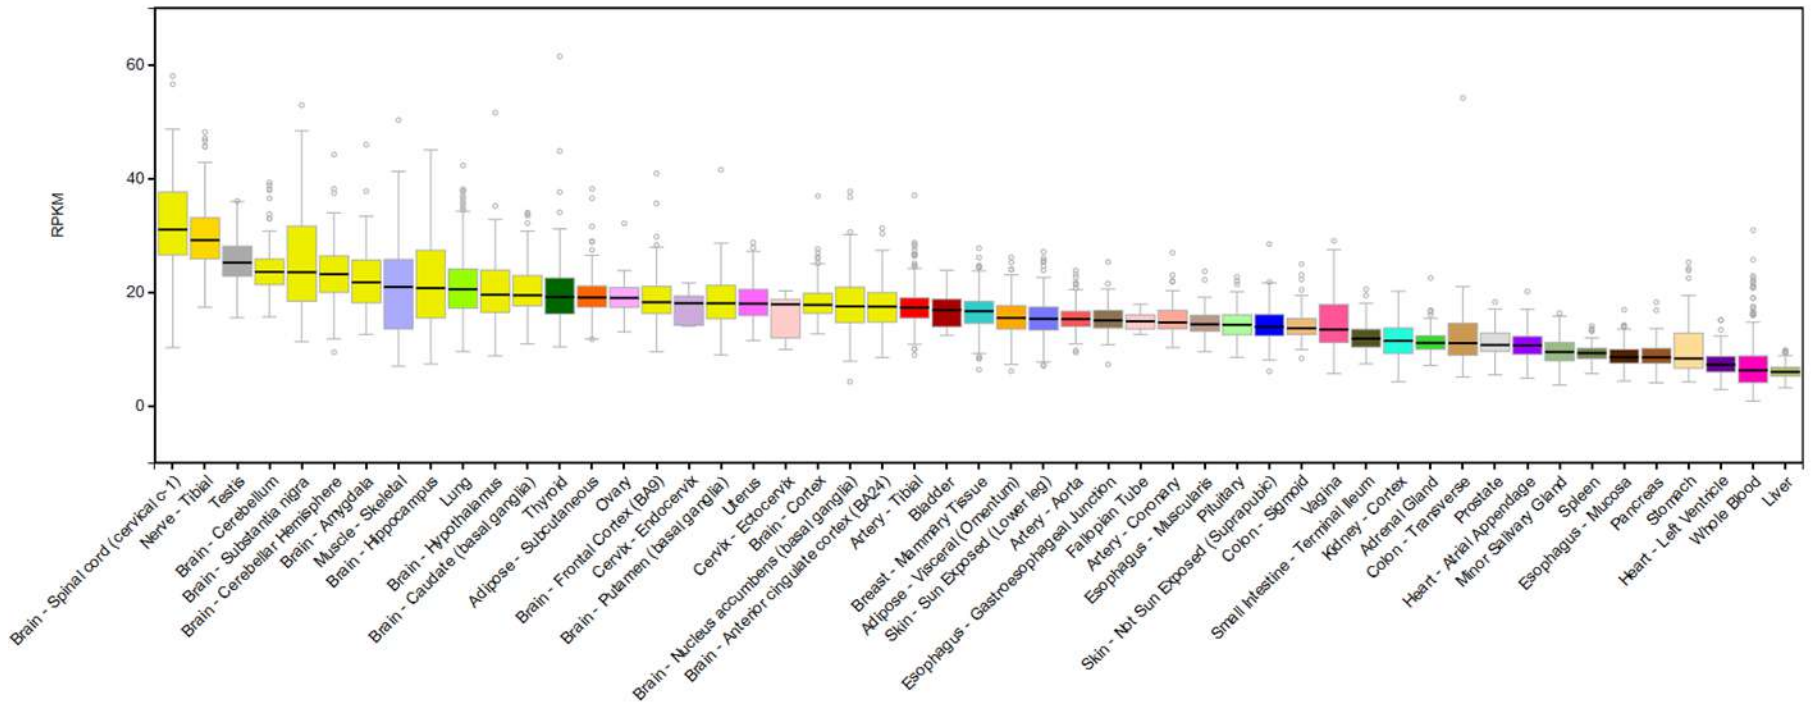

# TTK

Median RPKM of highest tissue: 13.590

Plot:  Gene  Isoform

Differentiation:  None  Gender

Scale:  Log  Linear

Sort: ABC ▲ ▼

Outliers:  On  Off

Display:  Boxes  Medians

Filter:

TTK Gene Expression

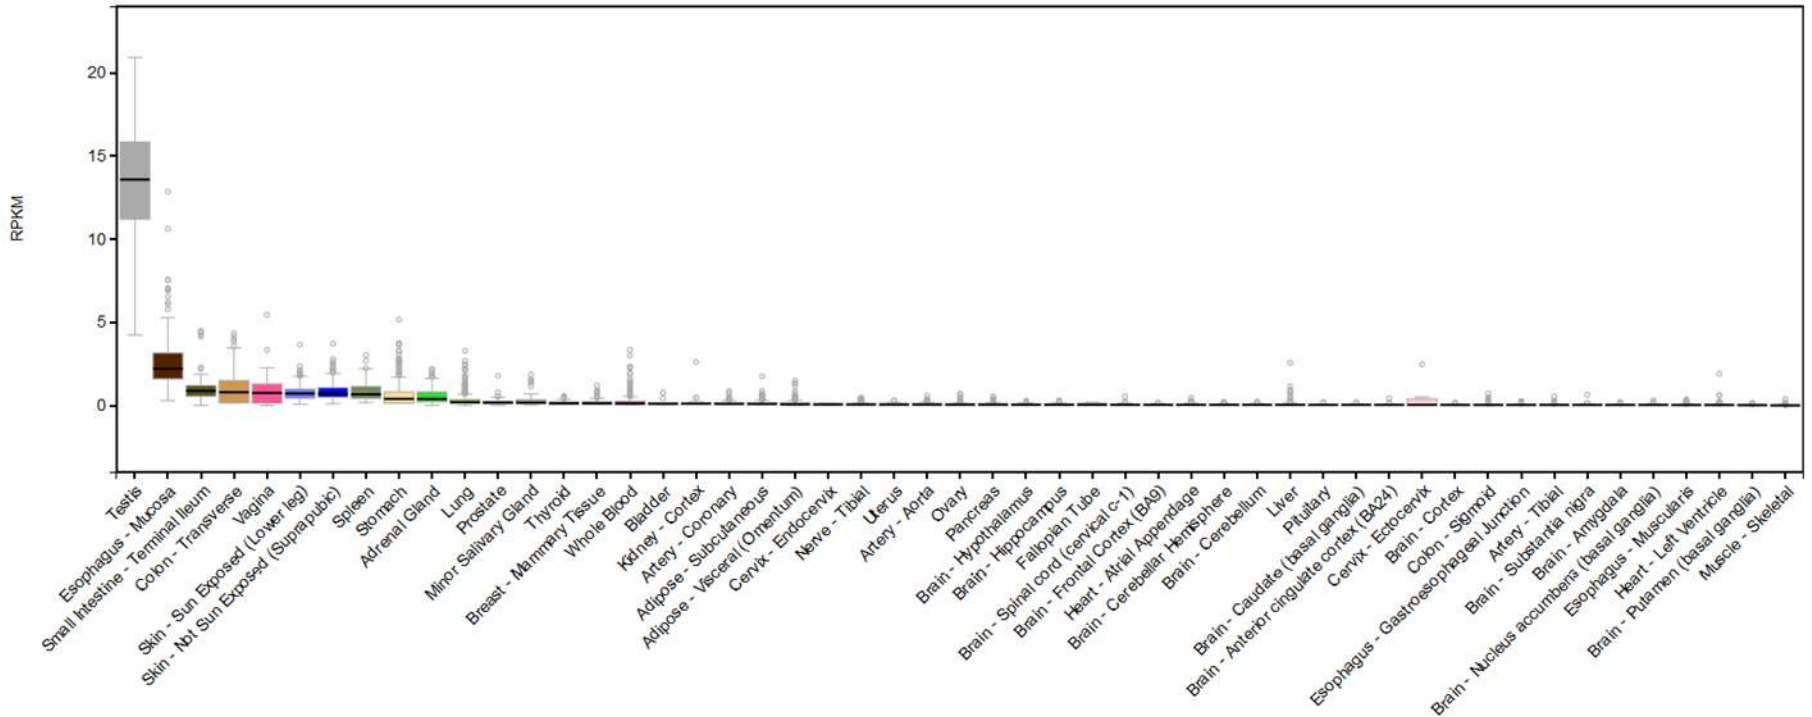

# DPPA2

Median RPKM of highest tissue: 2.787

Plot:      Differentiation:      Scale:      Sort:       Outliers:      Display:      Filter:

DPPA2 Gene Expression

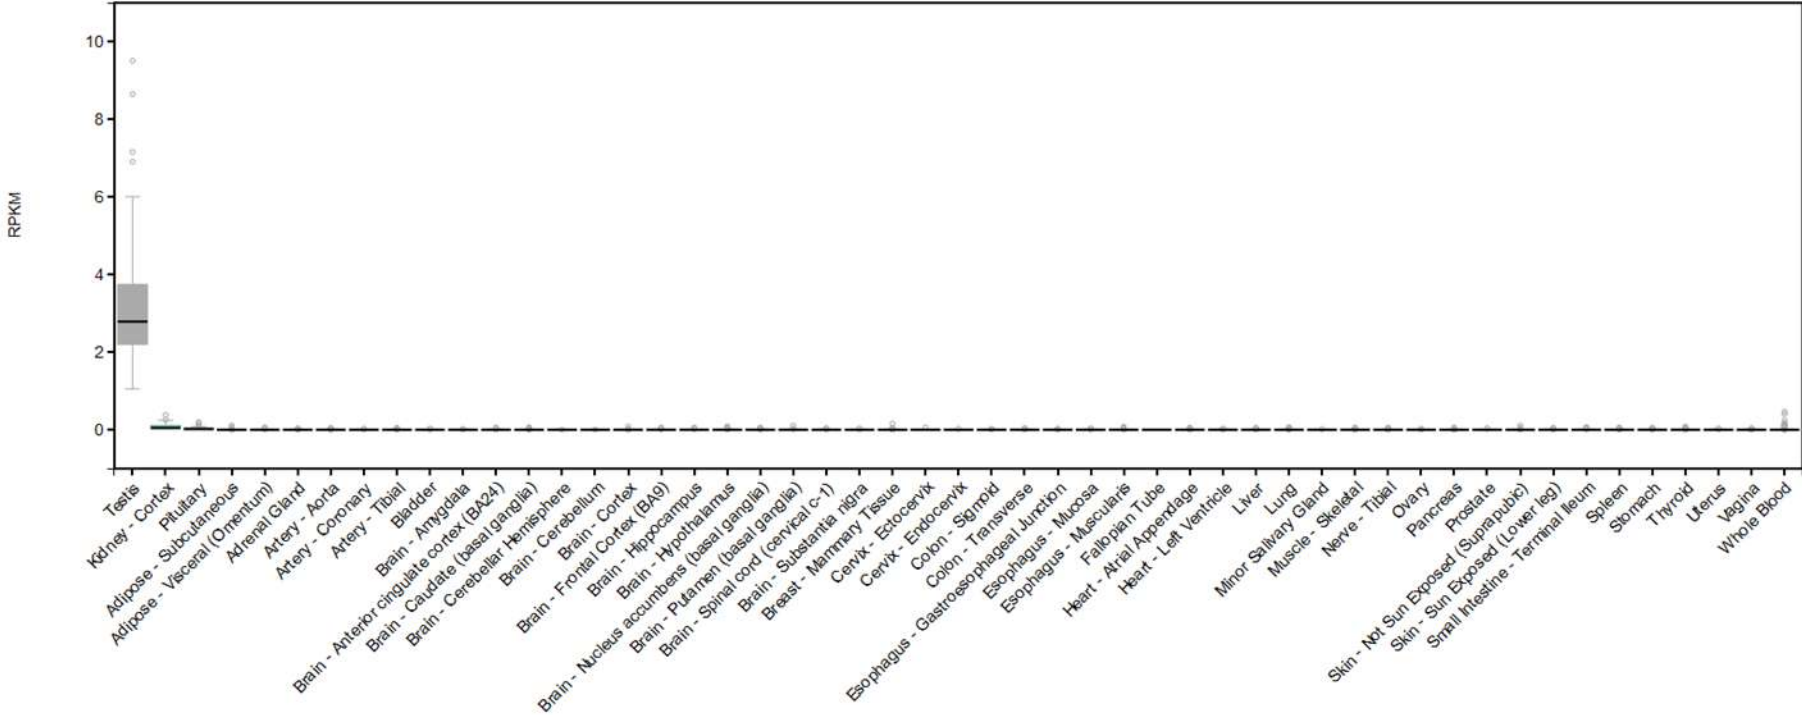

# KIAA0100

Median RPKM of highest tissue: 25.343

Plot: Gene  Isoform   
Differentiation: None  Gender   
Scale: Log  Linear   
Sort: ABC     
Outliers: On  Off   
Display: Boxes  Medians   
Filter: Tissue

KIAA0100 Gene Expression

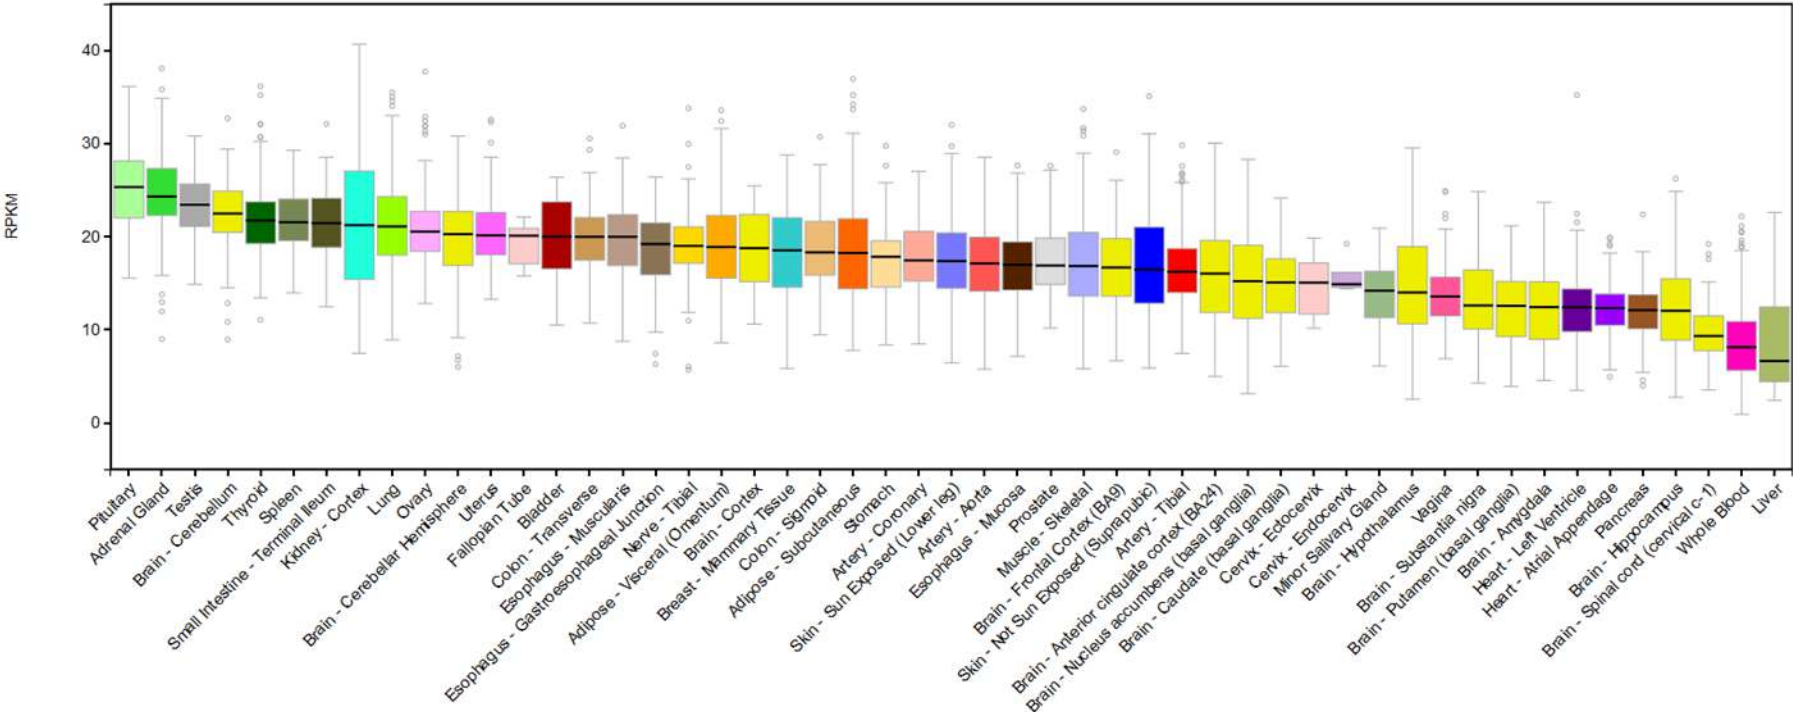



# DCAF12

Median RPKM of highest tissue: 33.210

Plot:  Gene  Isoform

Differentiation:  None  Gender

Scale:  Log  Linear

Sort: ABC  ▲  ▼

Outliers:  On  Off

Display:  Boxes  Medians

Filter:

DCAF12 Gene Expression

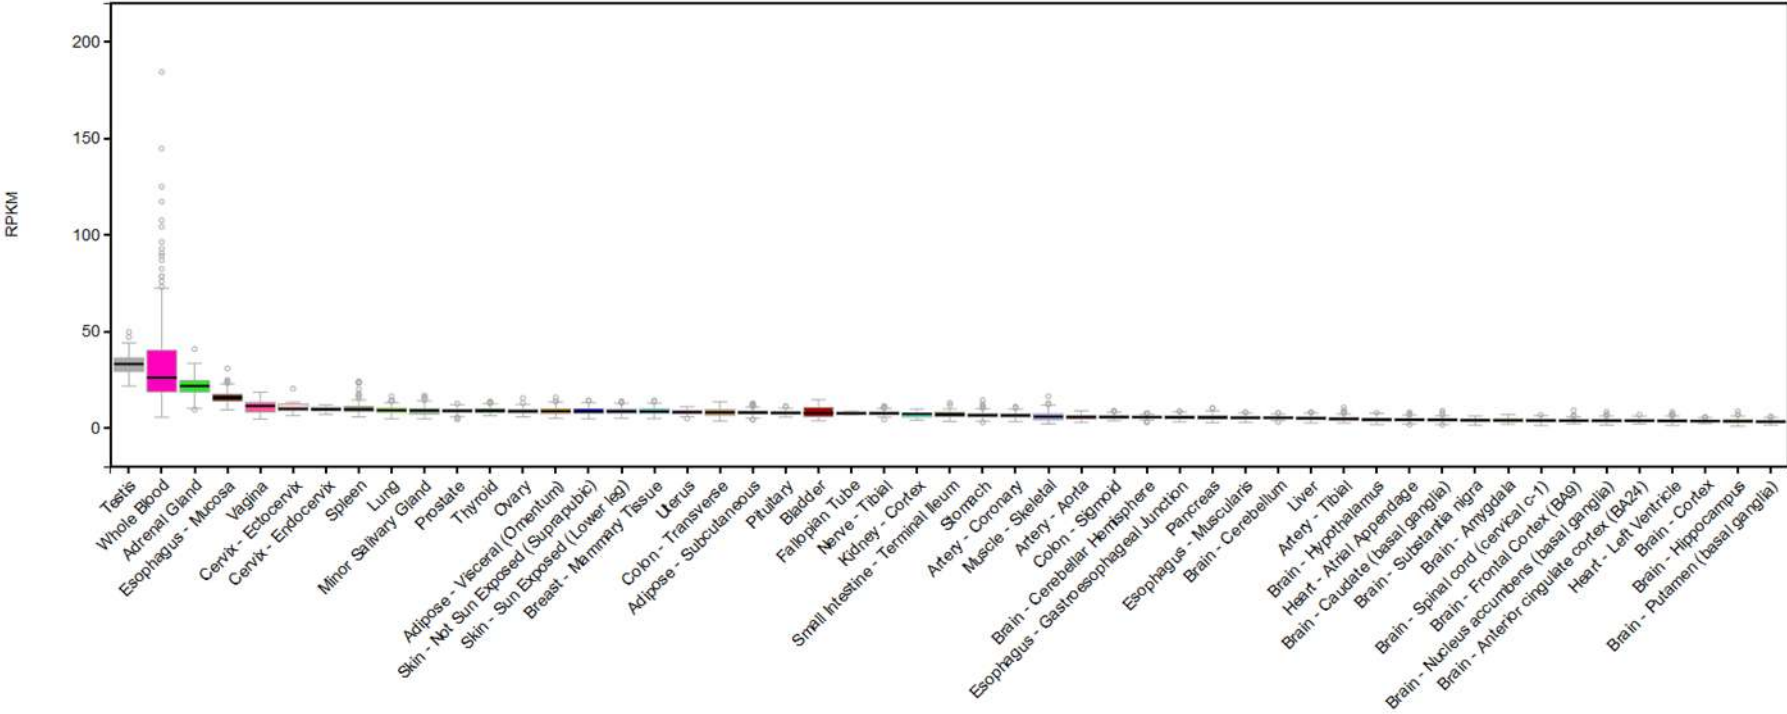

# CEP55

Median RPKM of highest tissue: 9.758

Plot:  Gene  Isoform

Differentiation:  None  Gender

Scale:  Log  Linear

Sort: ABC  ▲  ▼

Outliers:  On  Off

Display:  Boxes  Medians

Filter:

CEP55 Gene Expression

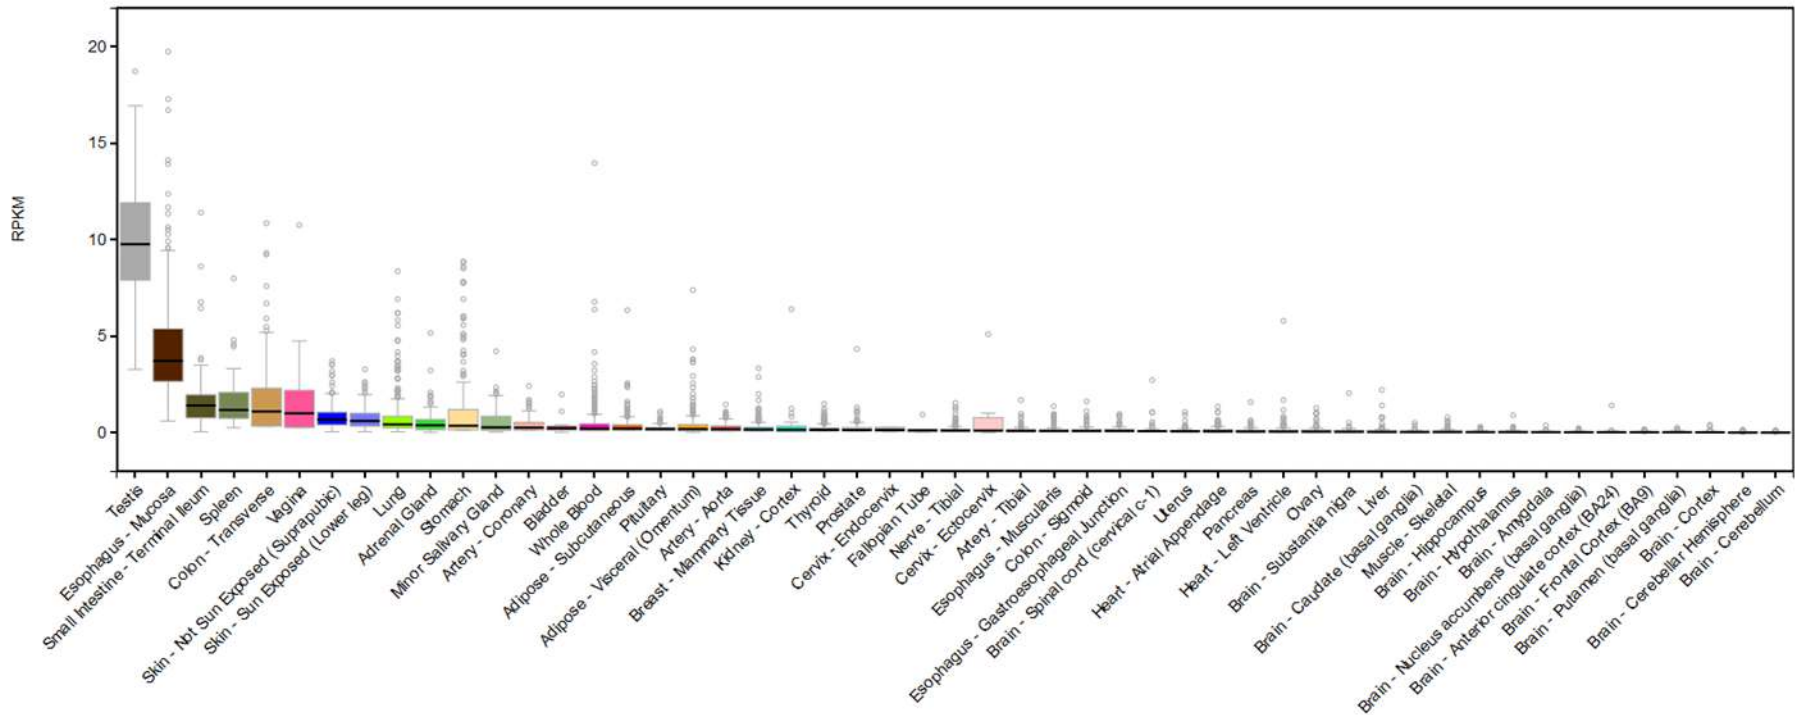

# TEX14

Median RPKM of highest tissue: 21.864

Plot:  Gene  Isoform

Differentiation:  None  Gender

Scale:  Log  Linear

Sort: ABC ▲ ▼

Outliers:  On  Off

Display:  Boxes  Medians

Filter:

TEX14 Gene Expression

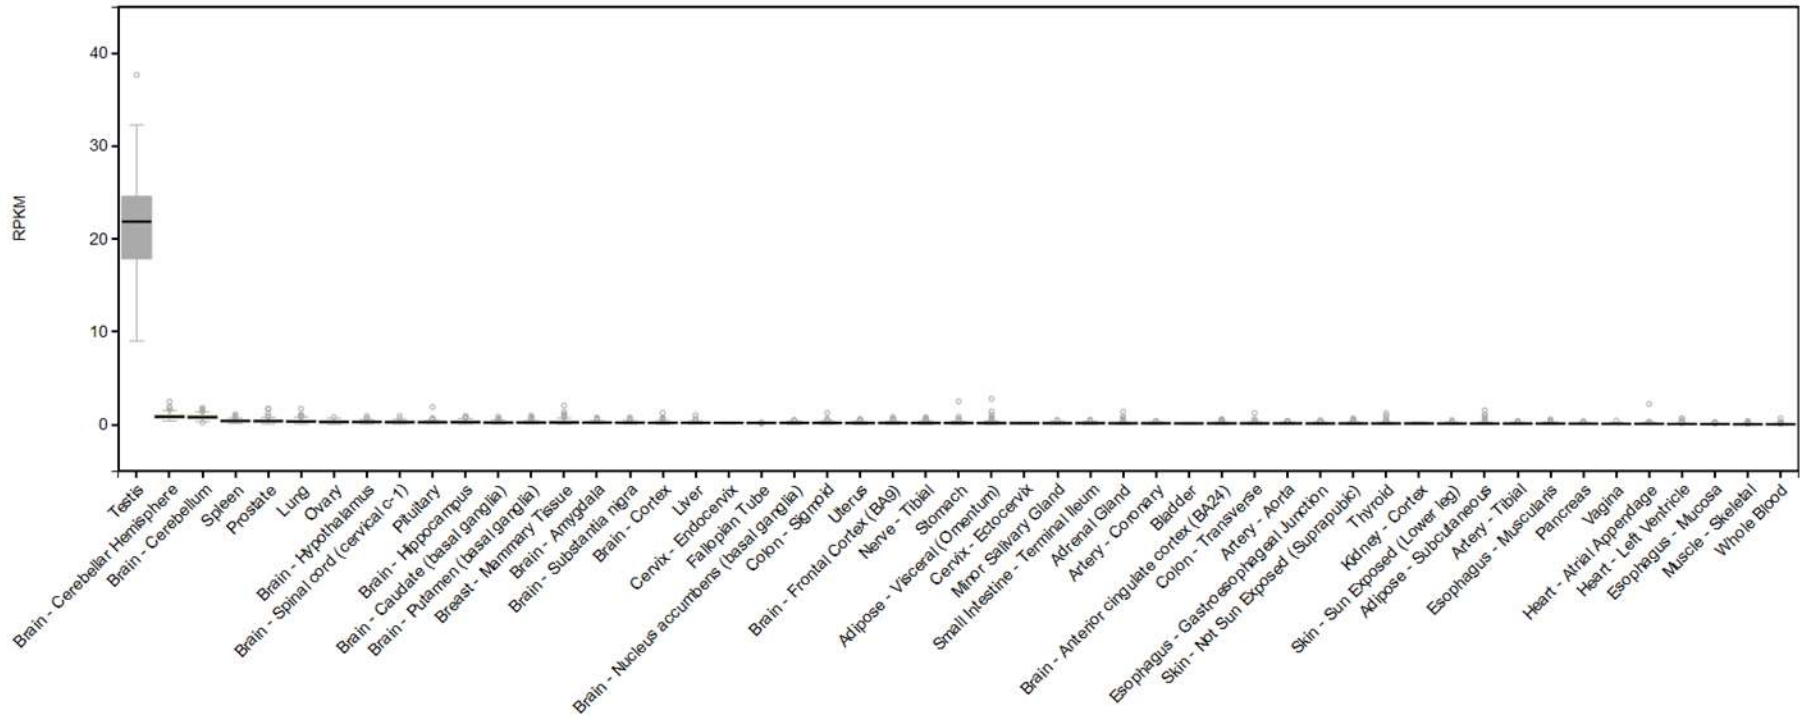

# ANKRD45

Median RPKM of highest tissue: 13.034

Plot:      Differentiation:      Scale:      Sort:       Outliers:      Display:      Filter:

ANKRD45 Gene Expression

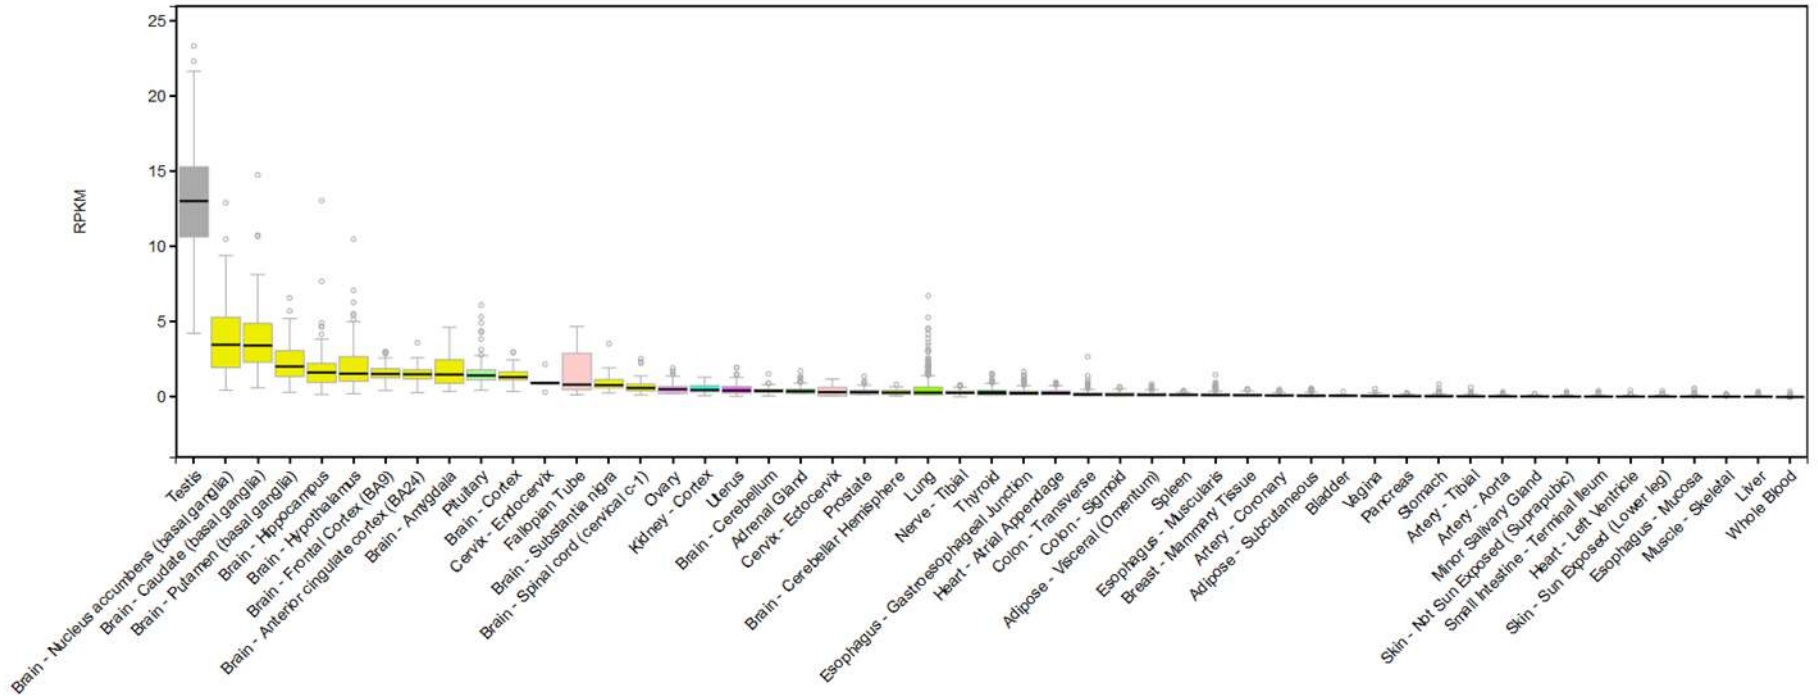

# IGSF11

Median RPKM of highest tissue: 17.509

Plot:  Gene  Isoform

Differentiation:  None  Gender

Scale:  Log  Linear

Sort: ABC ▲ ▼

Outliers:  On  Off

Display:  Boxes  Medians

Filter:

IGSF11 Gene Expression

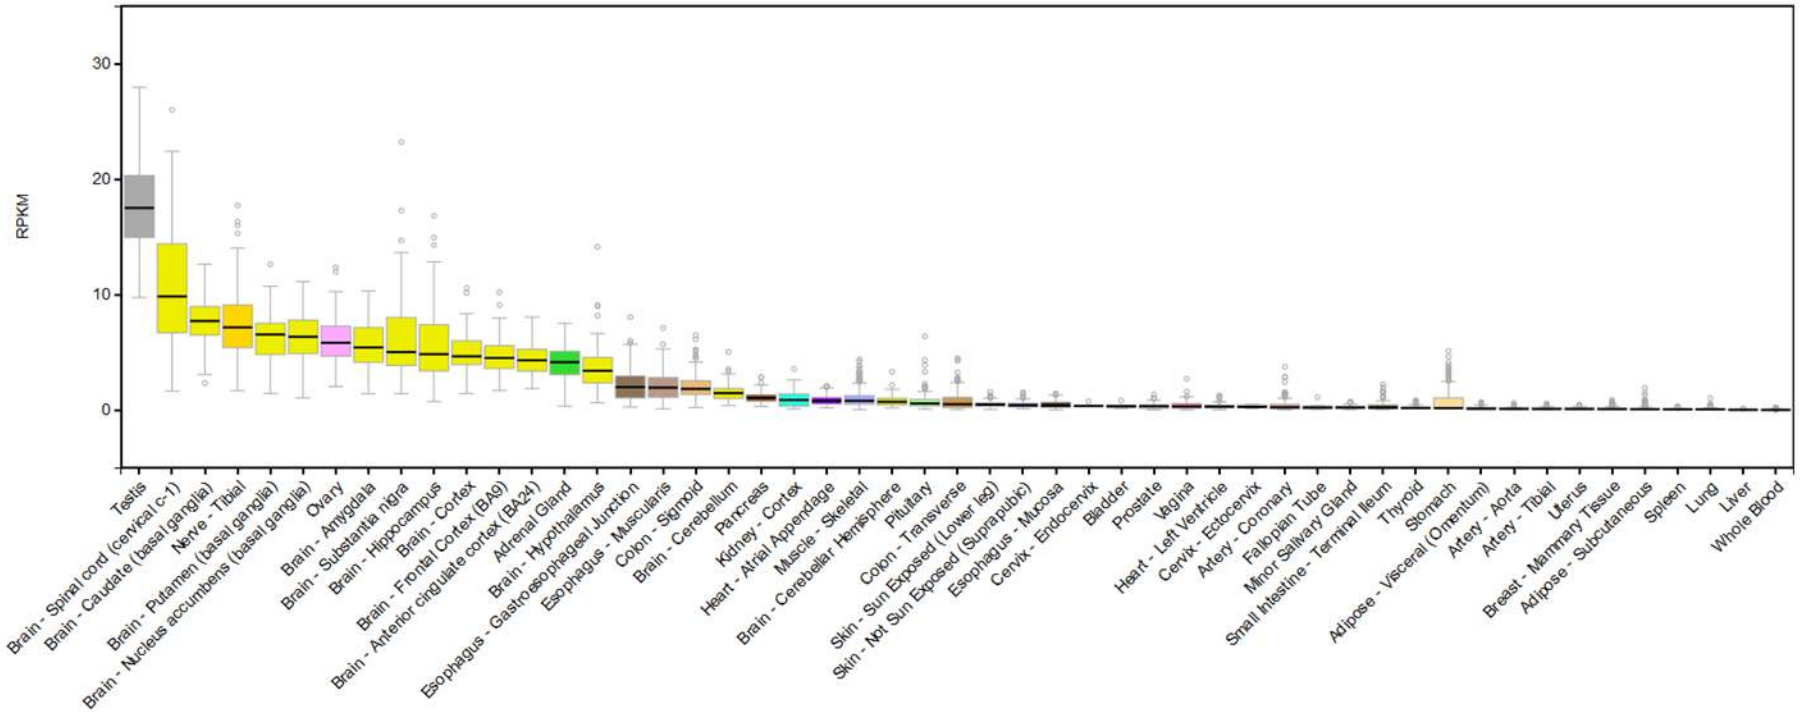

# TMEFF1

Median RPKM of highest tissue: 2.237

Plot:  Gene  Isoform

Differentiation:  None  Gender

Scale:  Log  Linear

Sort: ABC ▲ ▼

Outliers:  On  Off

Display:  Boxes  Medians

Filter:

TMEFF1 Gene Expression

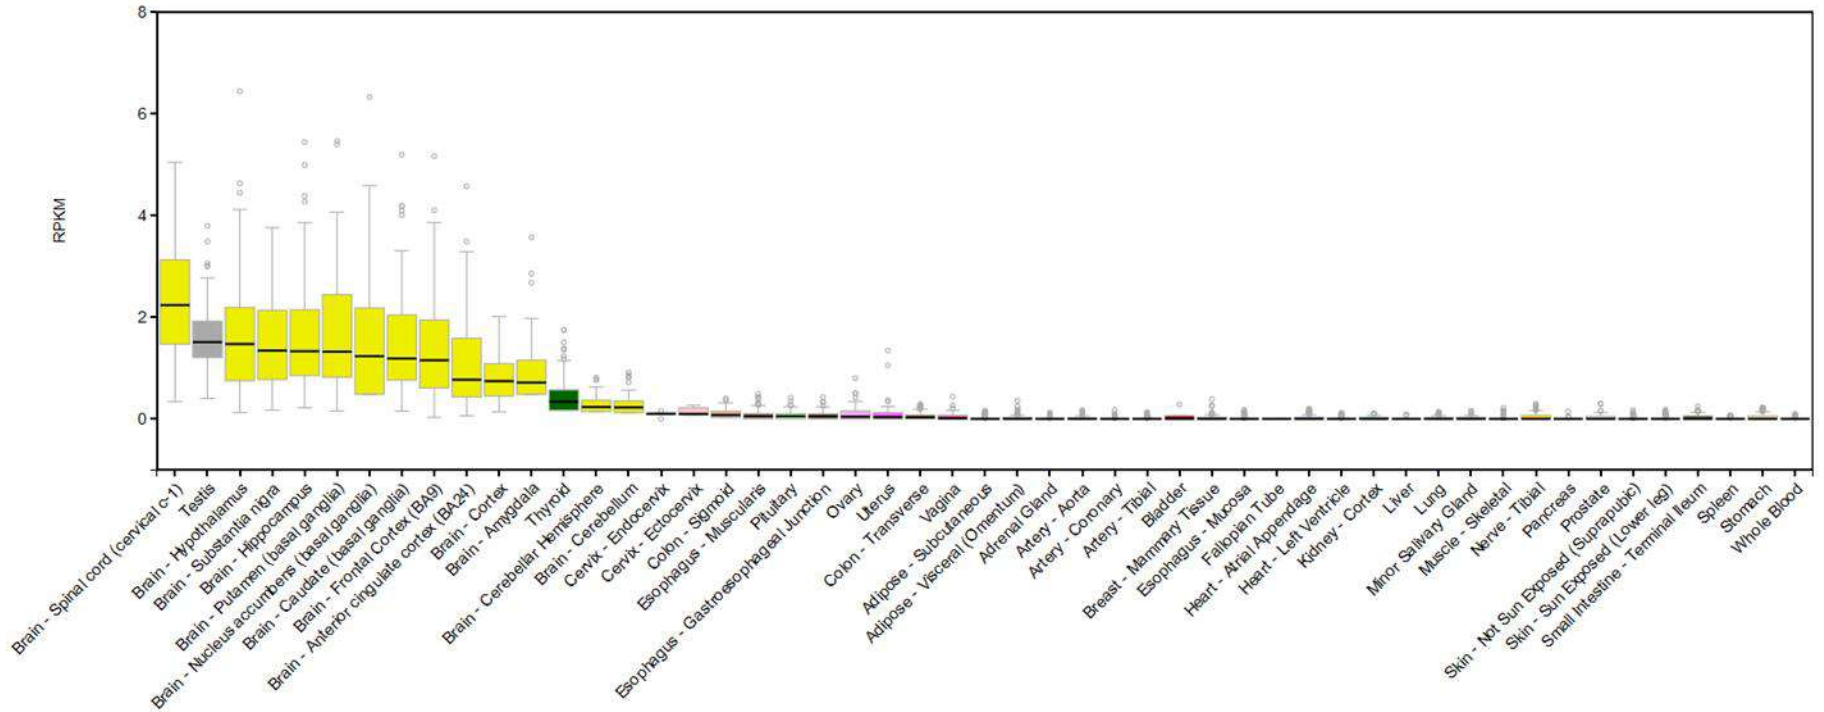



# ARX

Median RPKM of highest tissue: 55.097

Plot:  Gene  Isoform

Differentiation:  None  Gender

Scale:  Log  Linear

Sort: ABC  ▲  ▼

Outliers:  On  Off

Display:  Boxes  Medians

Filter:

ARX Gene Expression

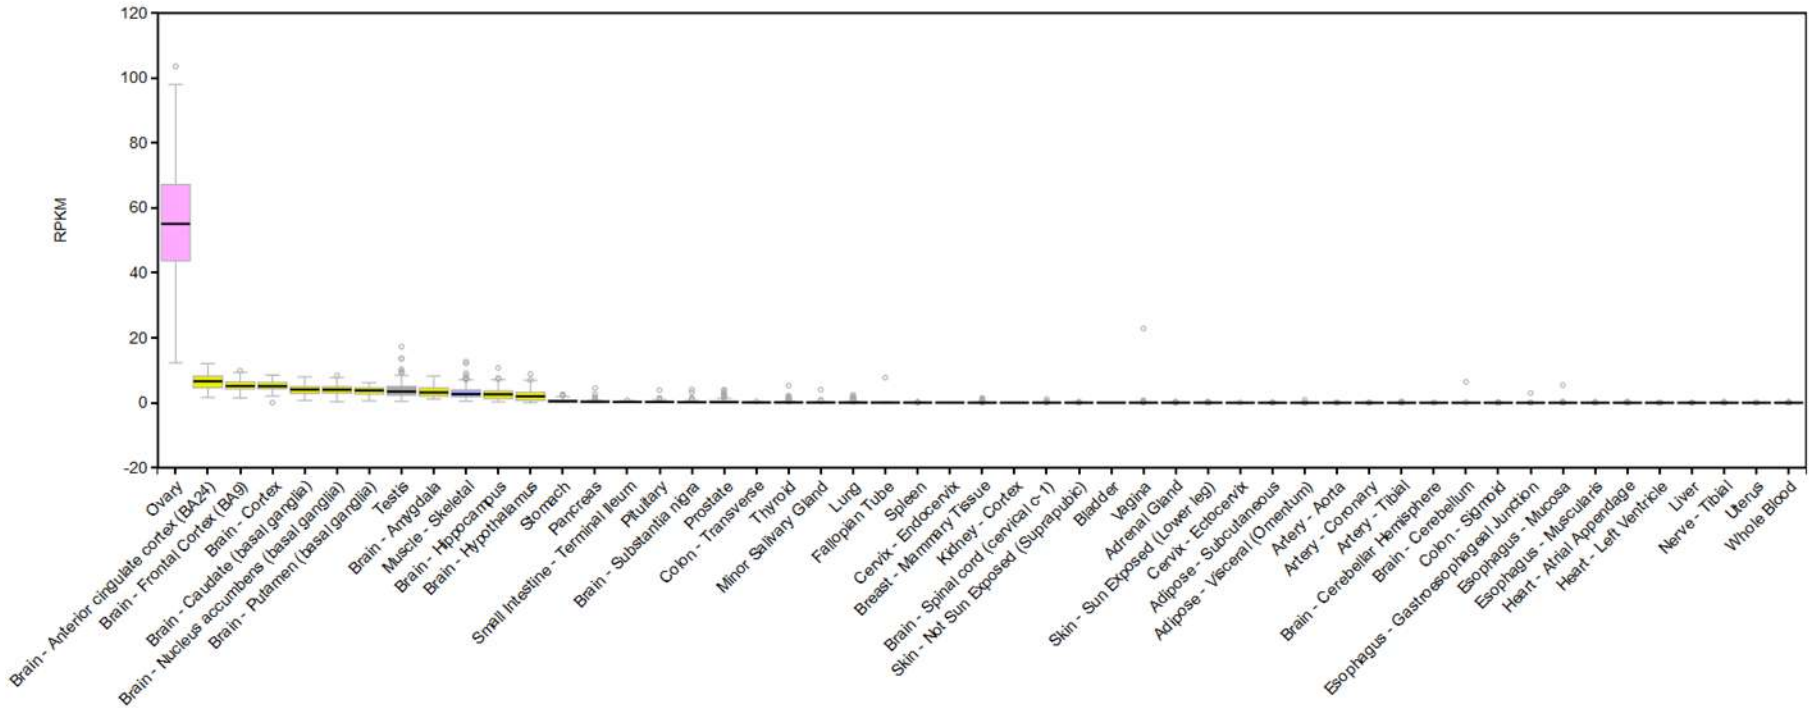

# SPAG4

Median RPKM of highest tissue: 35.025

Plot:  Gene  Isoform

Differentiation:  None  Gender

Scale:  Log  Linear

Sort: ABC  ▲  ▼

Outliers:  On  Off

Display:  Boxes  Medians

Filter:

SPAG4 Gene Expression

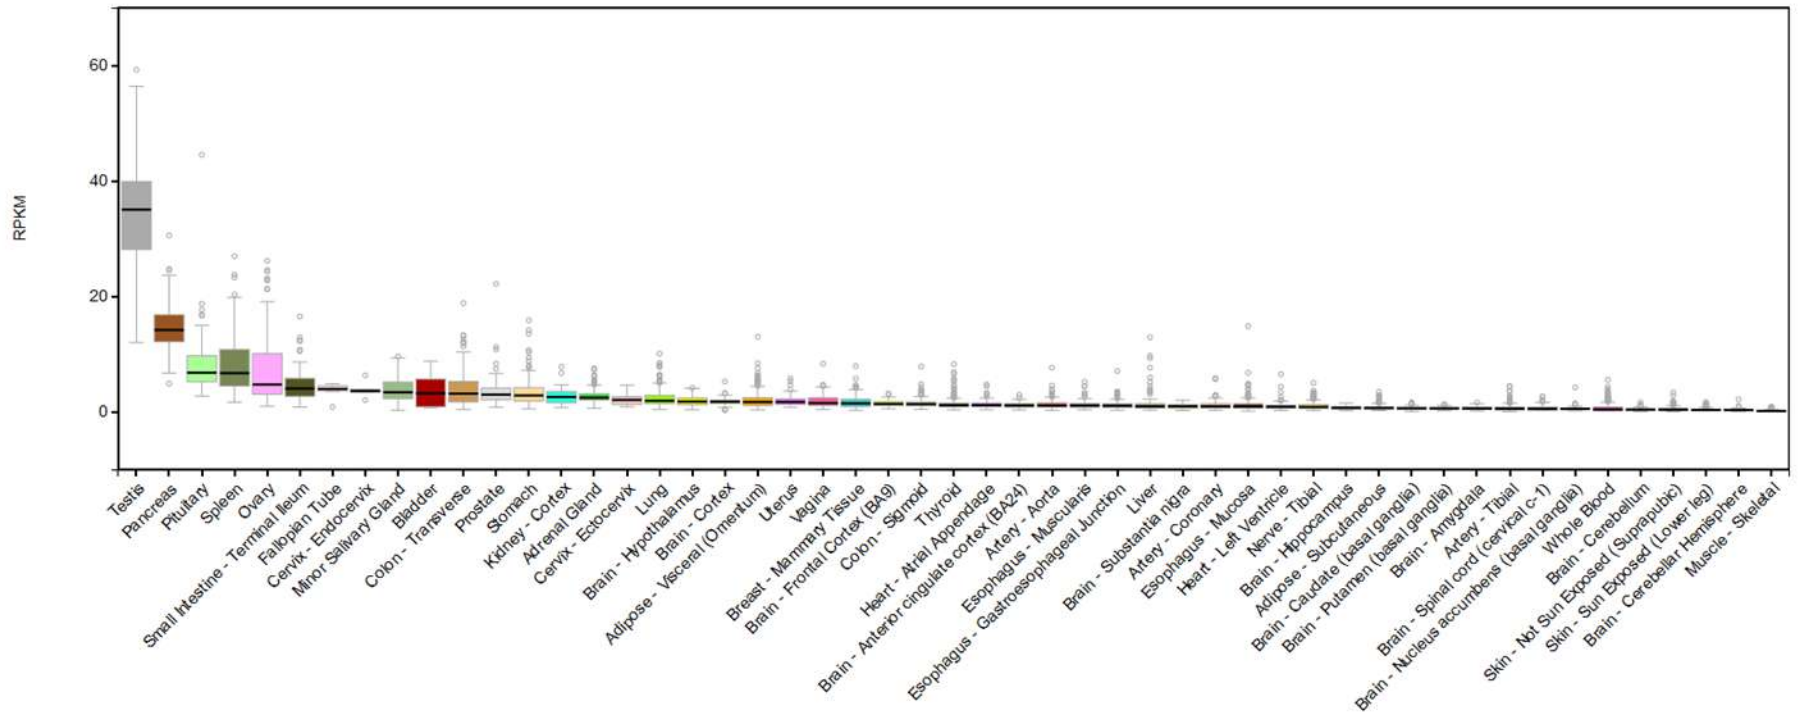

# RQCD1

Median RPKM of highest tissue: 16.761

Plot:  Gene  Isoform

Differentiation:  None  Gender

Scale:  Log  Linear

Sort: ABC ▲ ▼

Outliers:  On  Off

Display:  Boxes  Medians

Filter:

RQCD1 Gene Expression

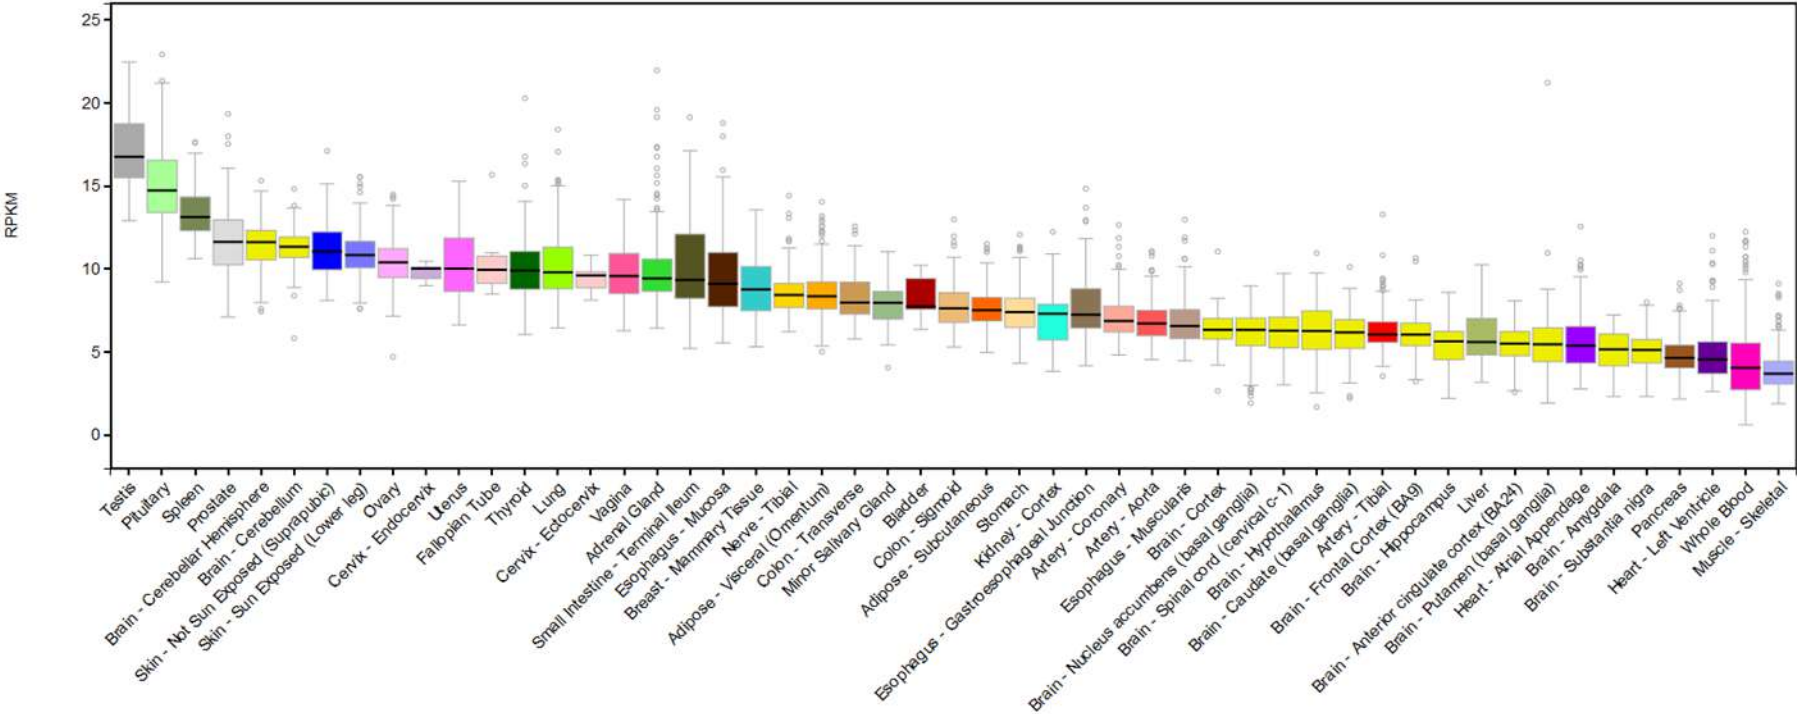

# PRAME

Median RPKM of highest tissue: 69.062

Plot:  Gene  Isoform

Differentiation:  None  Gender

Scale:  Log  Linear

Sort: ABC  ▲  ▼

Outliers:  On  Off

Display:  Boxes  Medians

Filter:  Tissue

PRAME Gene Expression

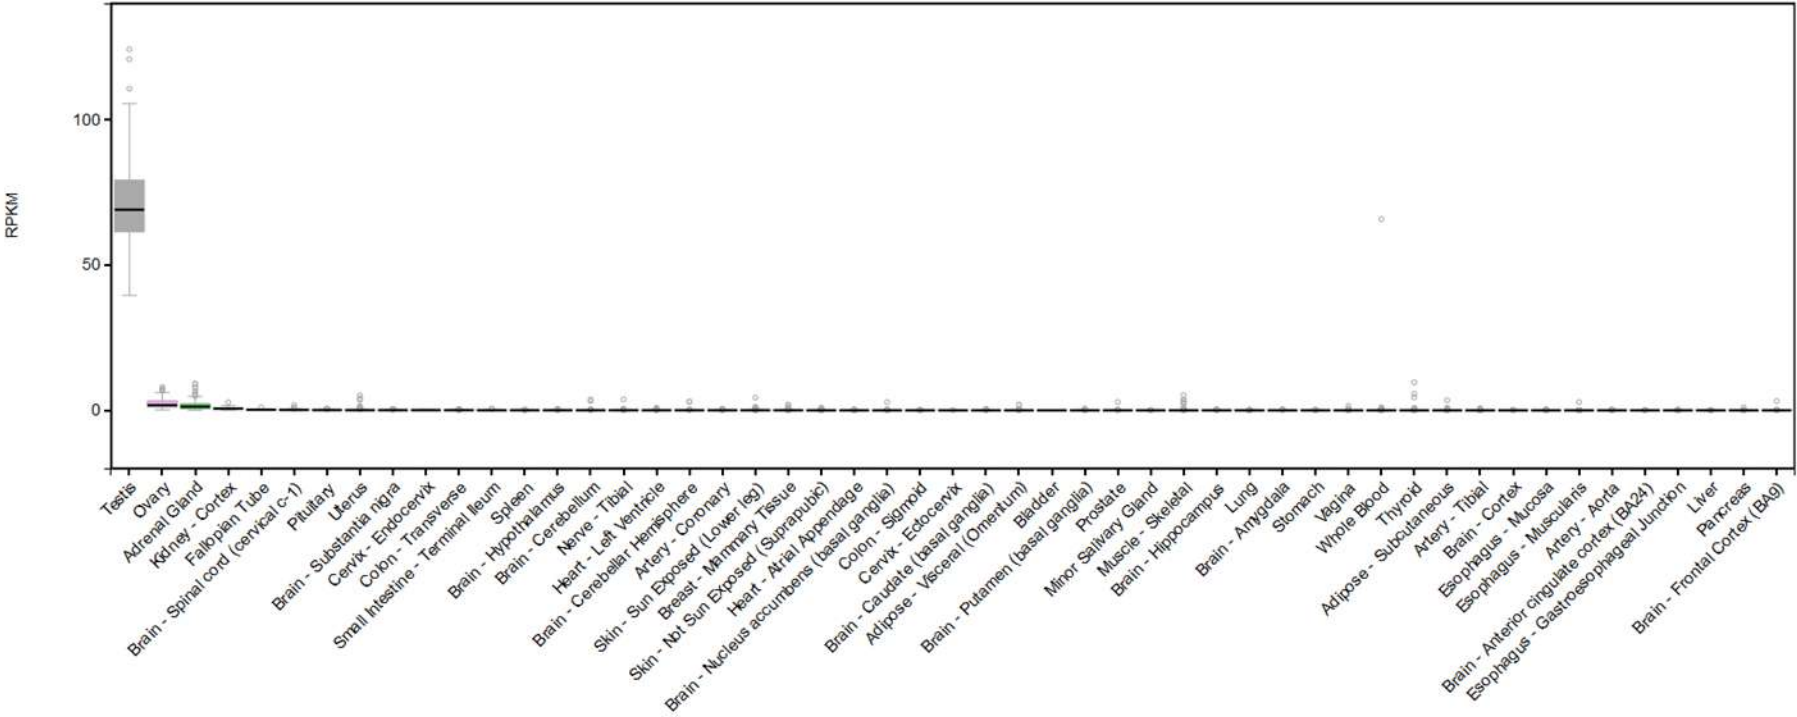

# ODF2

Median RPKM of highest tissue: 175.841

Pituitary: 22.820

Plot:  Gene  Isoform

Differentiation:  None  Gender

Scale:  Log  Linear

Sort: ABC  ▲  ▼

Outliers:  On  Off

Display:  Boxes  Medians

Filter:  Tissue

ODF2 Gene Expression

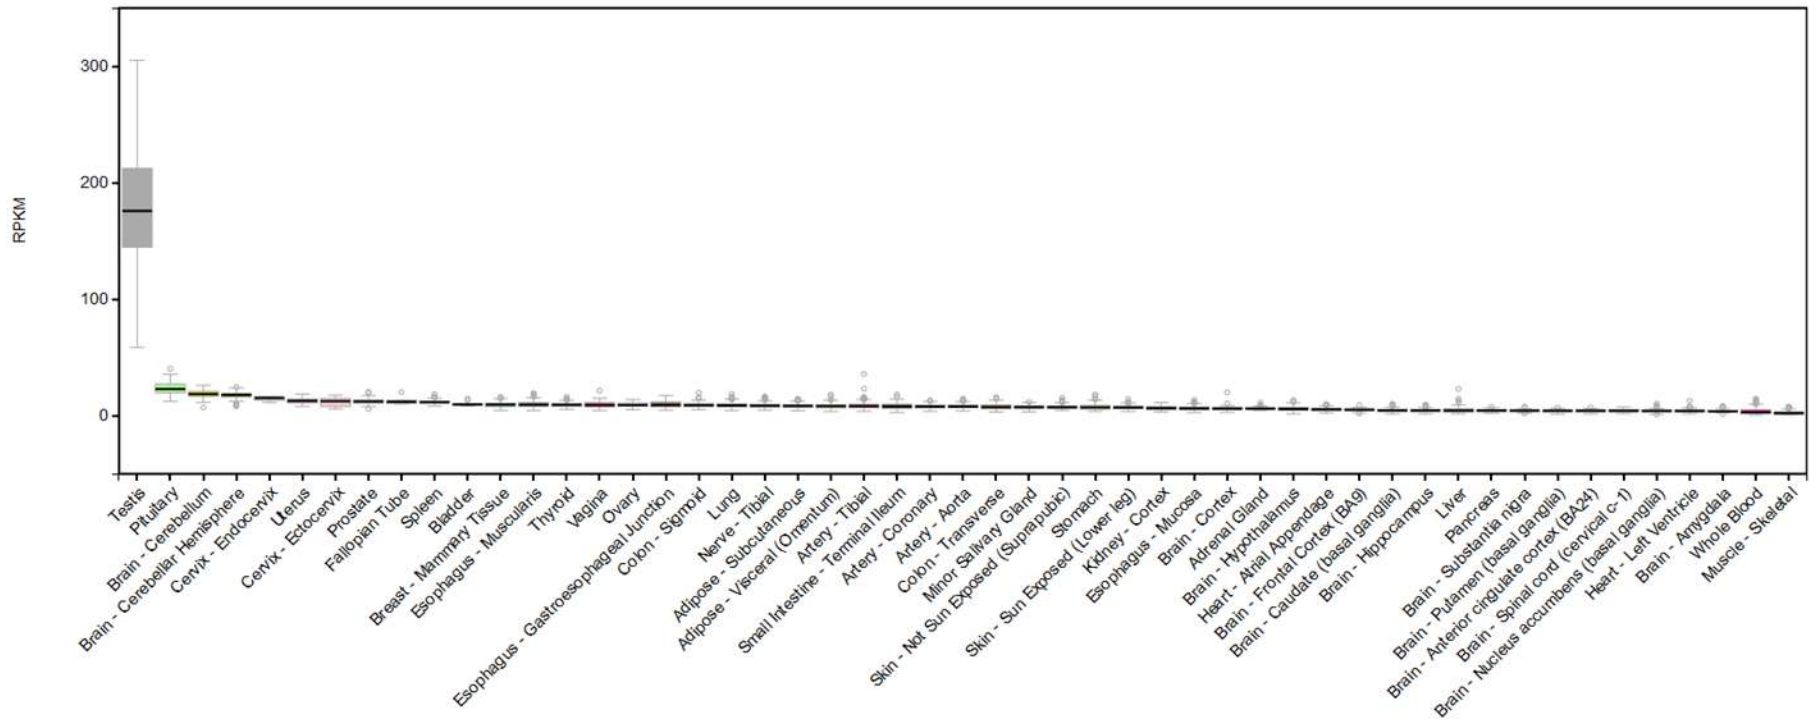

# ATAD2

Median RPKM of highest tissue: 13.321

Plot:      Differentiation:      Scale:      Sort:       Outliers:      Display:      Filter:

ATAD2 Gene Expression

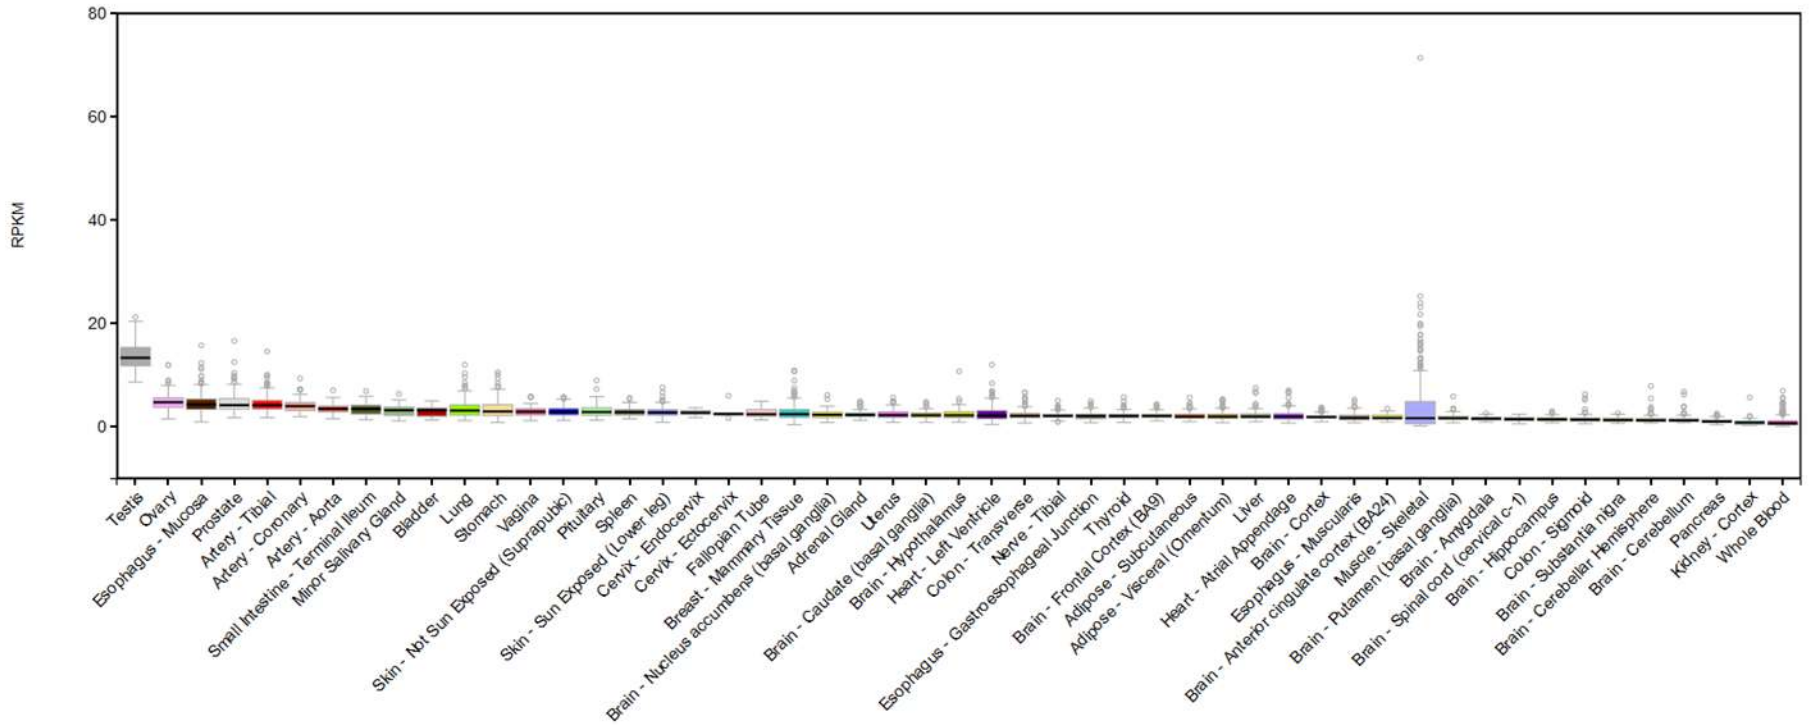



# TEKT5

Median RPKM of highest tissue: 28.992

Plot:      Differentiation:      Scale:      Sort:       Outliers:      Display:      Filter:

TEKT5 Gene Expression

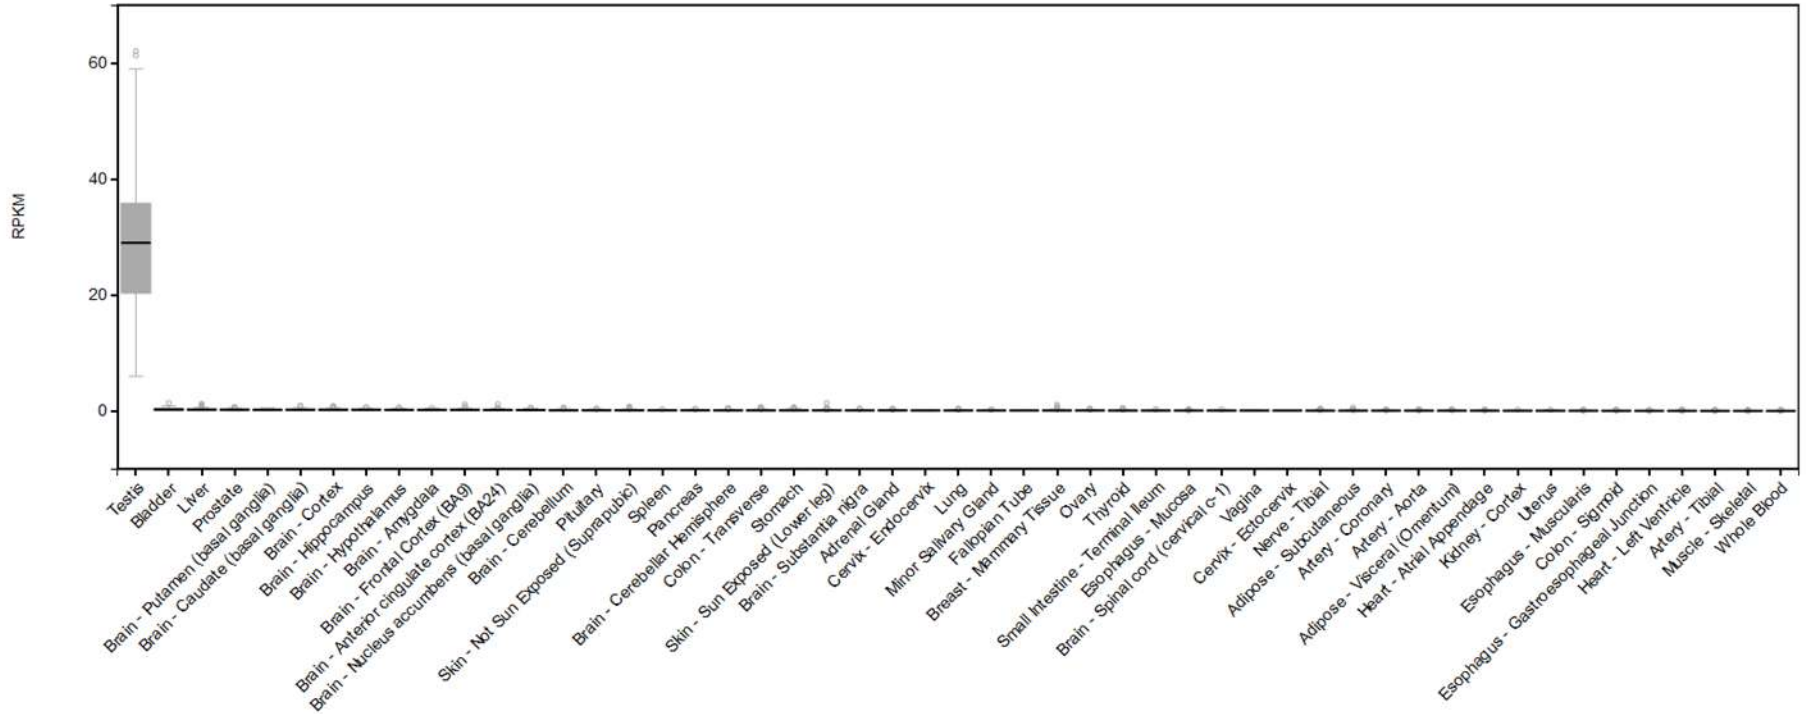

# TMPRSS12

Median RPKM of highest tissue: 8.800

Plot:  Gene  Isoform

Differentiation:  None  Gender

Scale:  Log  Linear

Sort: ABC  ▲  ▼

Outliers:  On  Off

Display:  Boxes  Medians

Filter:  Tissue

TMPRSS12 Gene Expression

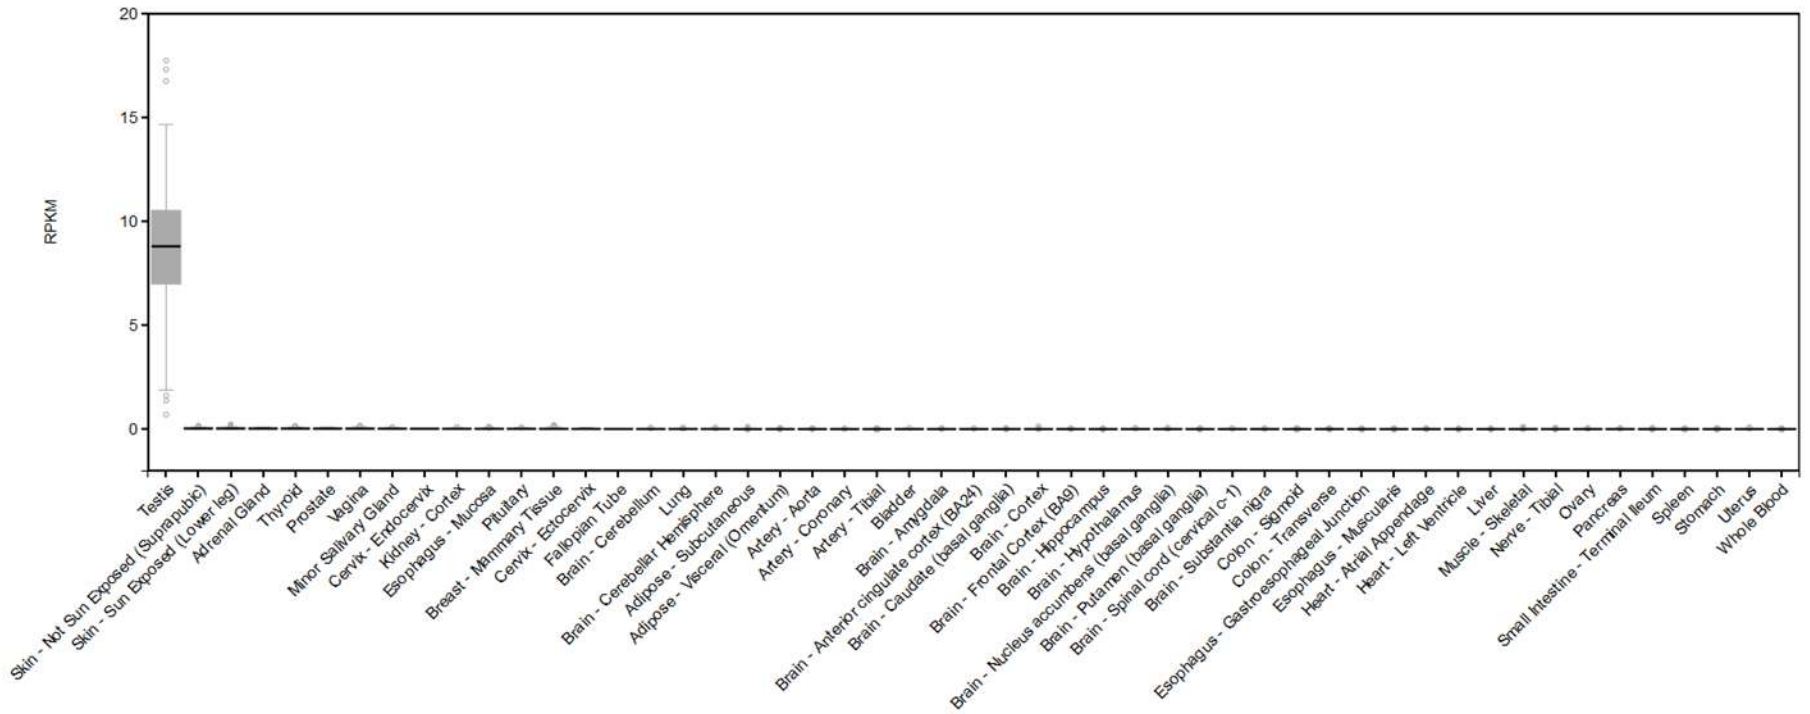

# DMRT1

Median RPKM of highest tissue: 21.299

Plot:  Gene  Isoform

Differentiation:  None  Gender

Scale:  Log  Linear

Sort: ABC ▲ ▼

Outliers:  On  Off

Display:  Boxes  Medians

Filter:

DMRT1 Gene Expression

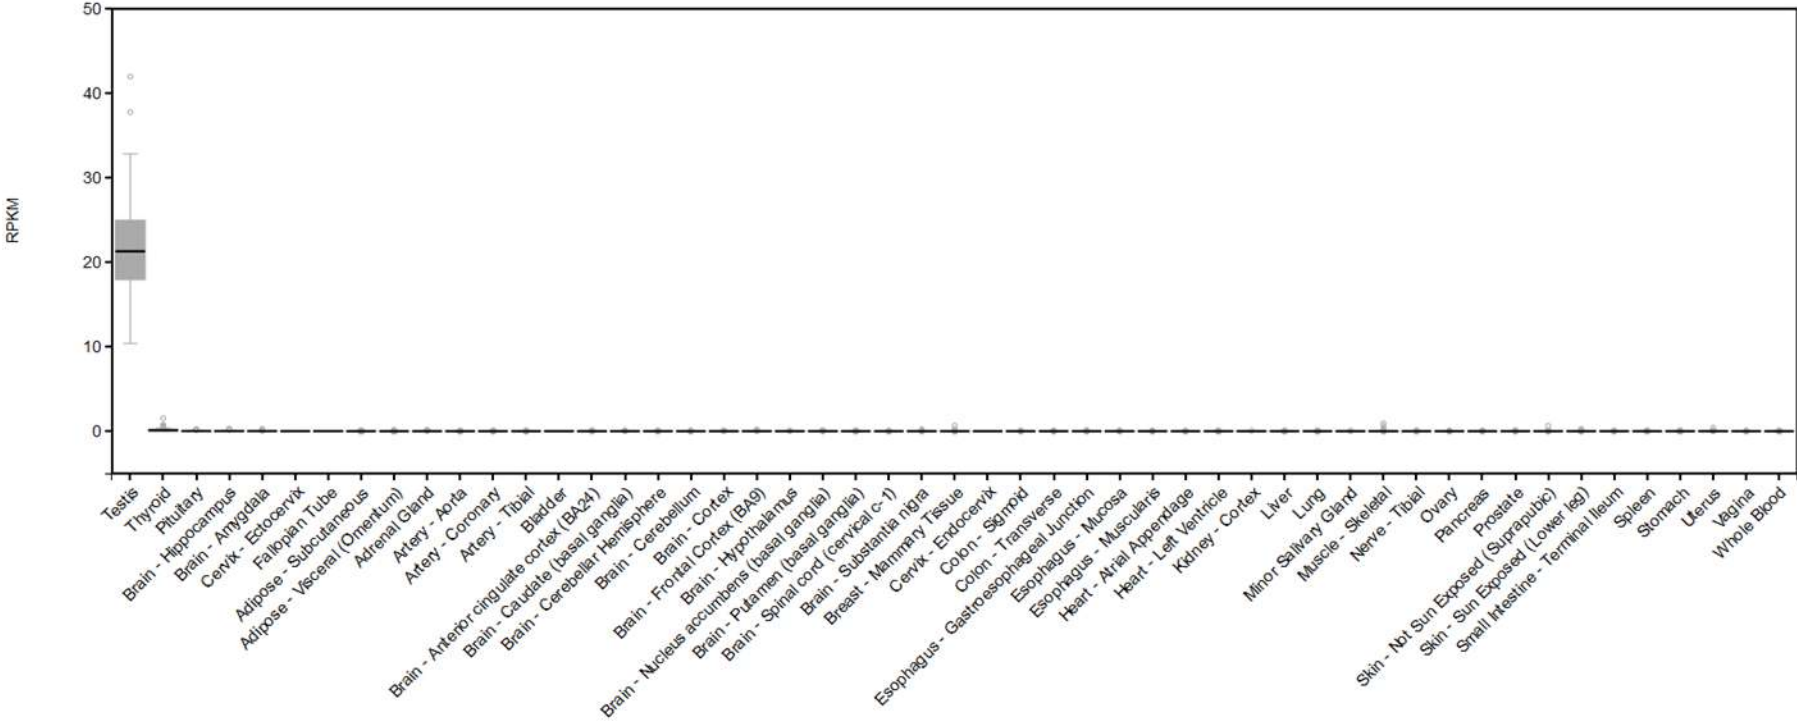

# CCNA1

Median RPKM of highest tissue: 57.378

Plot:  Gene  Isoform

Differentiation:  None  Gender

Scale:  Log  Linear

Sort: ABC  ▲  ▼

Outliers:  On  Off

Display:  Boxes  Medians

Filter:

CCNA1 Gene Expression

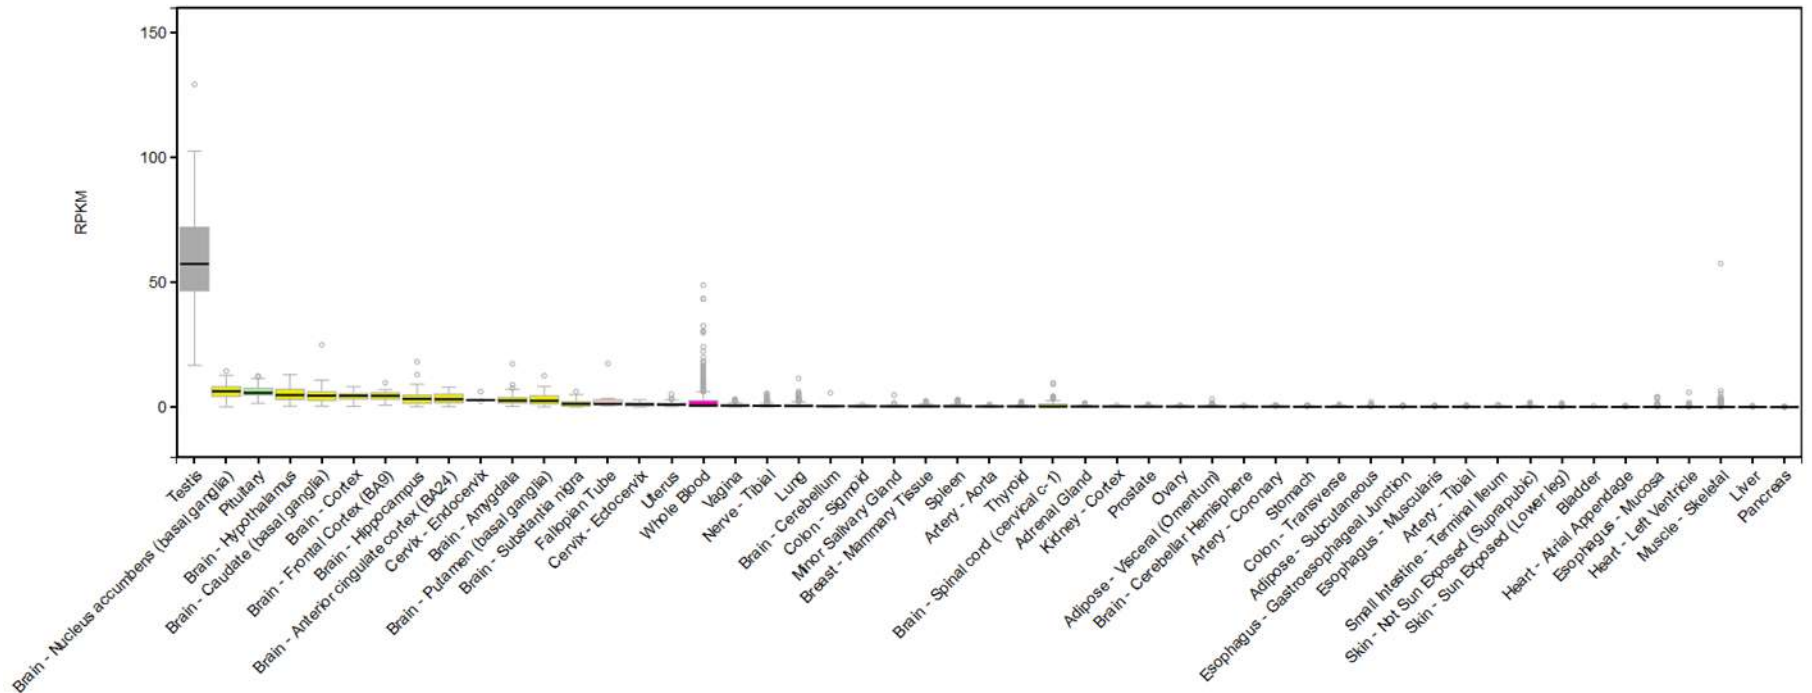

# KDM5B

Median RPKM of highest tissue: 65.247

Plot:      Differentiation:      Scale:      Sort:       Outliers:      Display:      Filter:

KDM5B Gene Expression

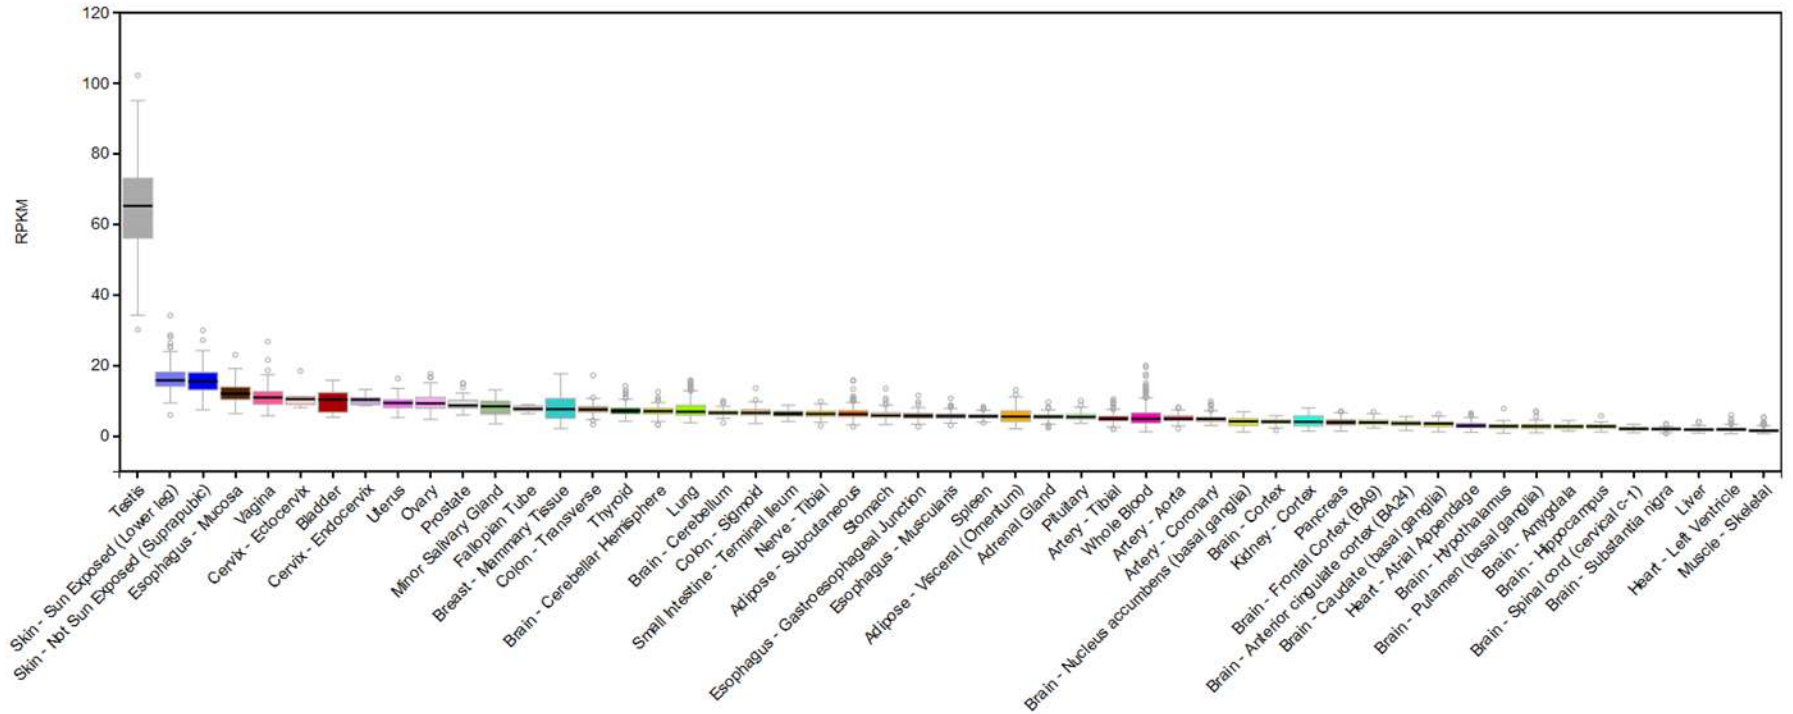

# RNF17

Median RPKM of highest tissue: 15.925

Plot:  Gene  Isoform

Differentiation:  None  Gender

Scale:  Log  Linear

Sort: ABC ▲ ▼

Outliers:  On  Off

Display:  Boxes  Medians

Filter:

RNF17 Gene Expression

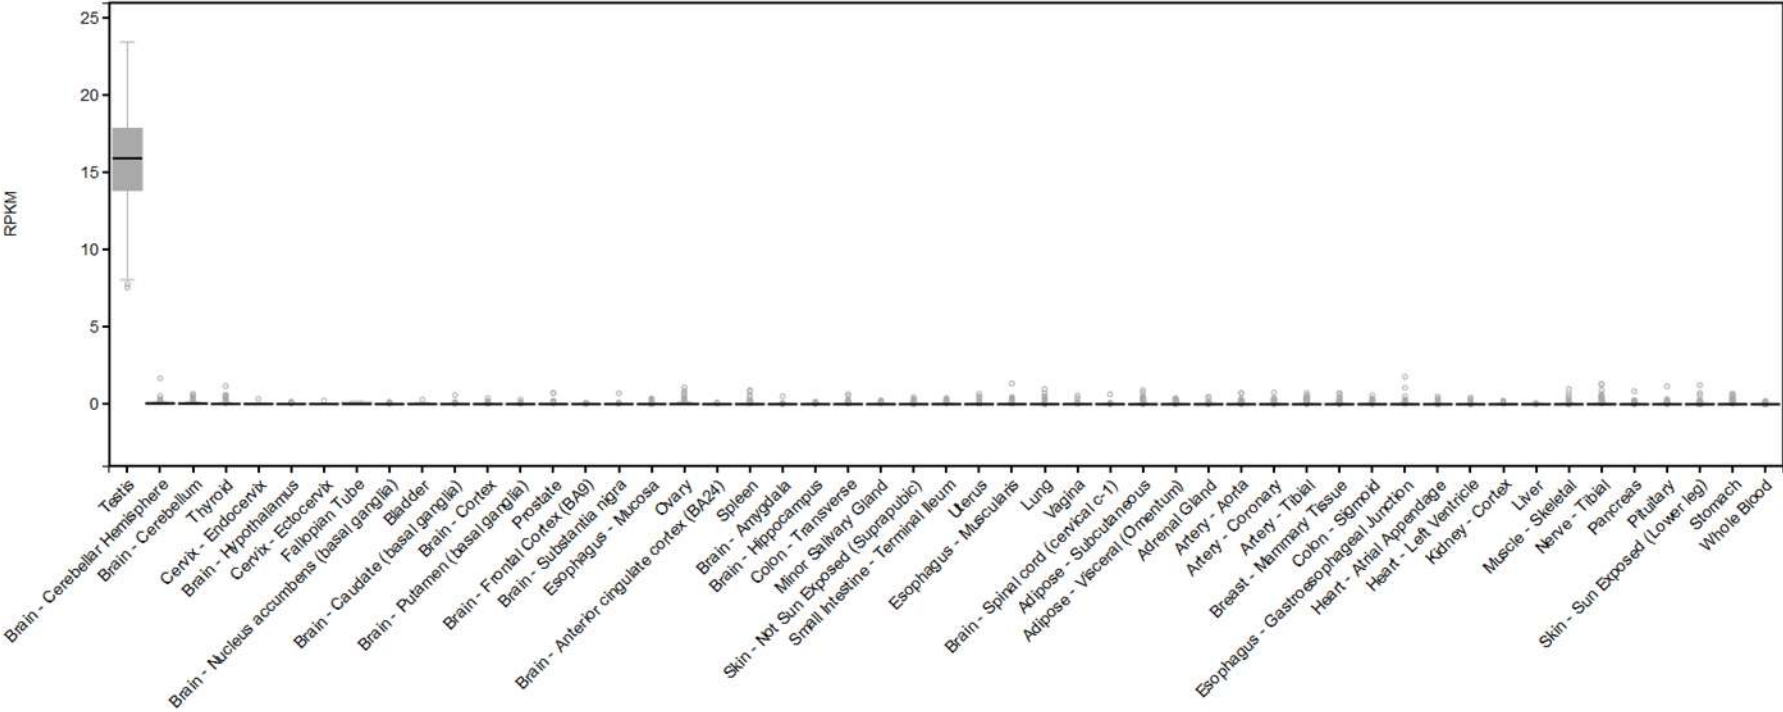



# KIF20B

Median RPKM of highest tissue: 4.326

Plot: Gene  Isoform  | Differentiation: None  Gender  | Scale: Log  Linear  | Sort: ABC  ▲  ▼  | Outliers: On  Off  | Display: Boxes  Medians  | Filter: Tissue

KIF20B Gene Expression

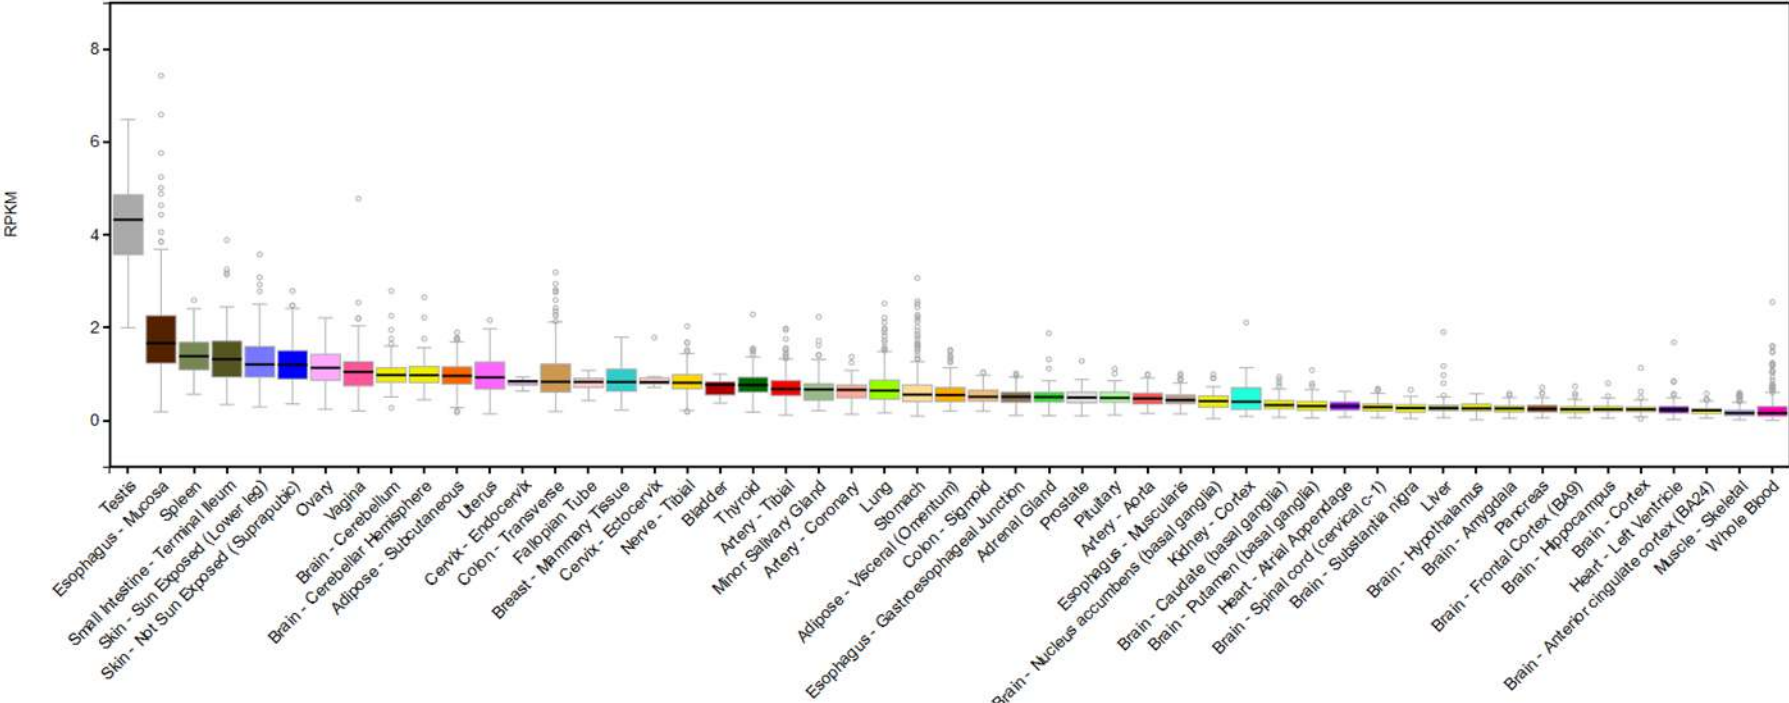

# NUF2

Median RPKM of highest tissue: 21.680

Plot:  Gene  Isoform

Differentiation:  None  Gender

Scale:  Log  Linear

Sort: ABC ▲ ▼

Outliers:  On  Off

Display:  Boxes  Medians

Filter:

NUF2 Gene Expression

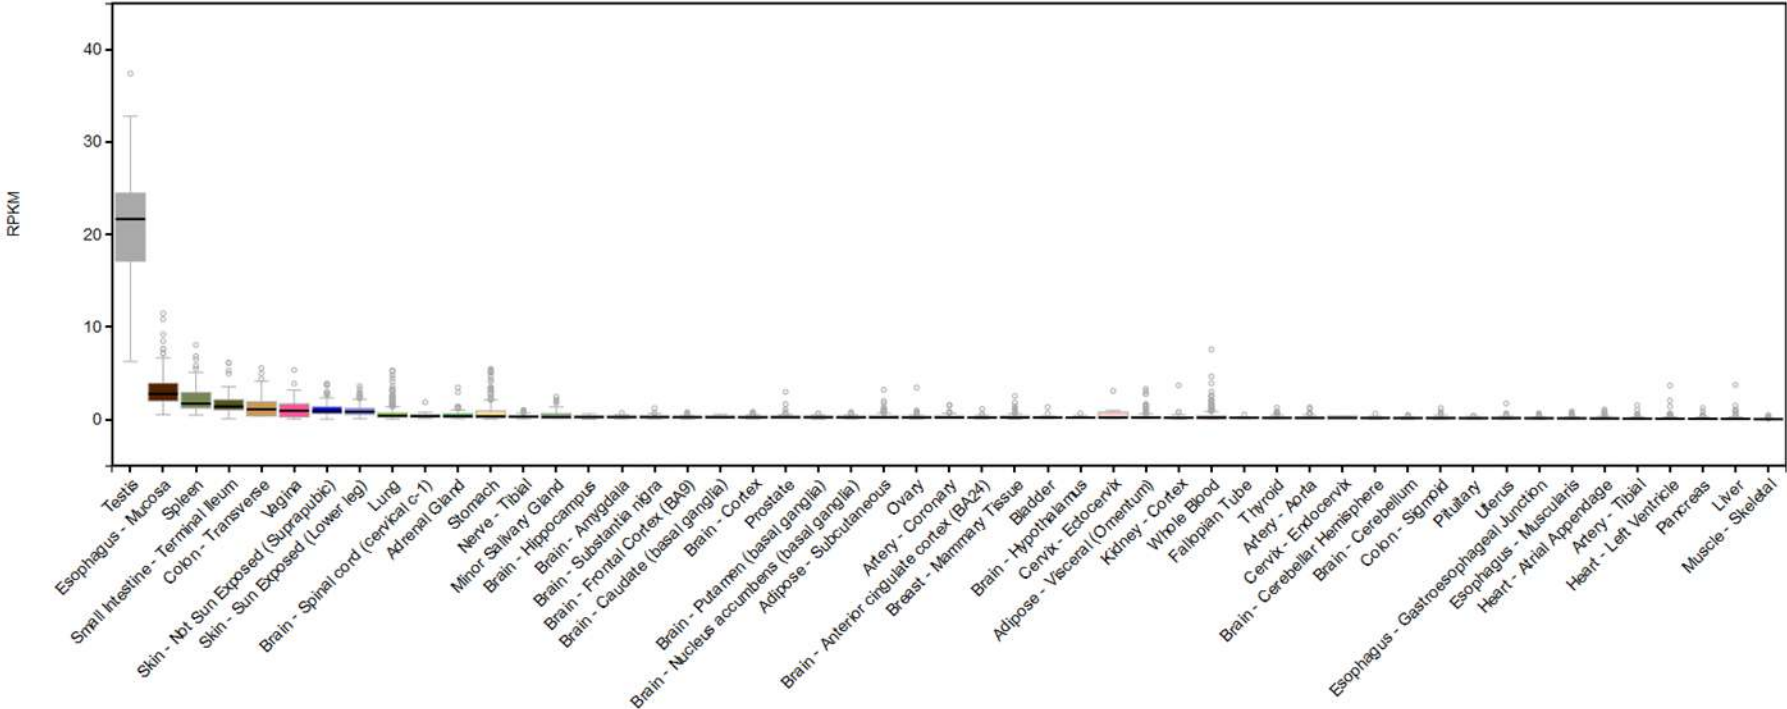

# KIF2C

Median RPKM of highest tissue: 74.968

Esophagus-Mucosa: 3.484

Plot:  Gene  Isoform

Differentiation:  None  Gender

Scale:  Log  Linear

Sort: ABC ▲ ▼

Outliers:  On  Off

Display:  Boxes  Medians

Filter:

KIF2C Gene Expression

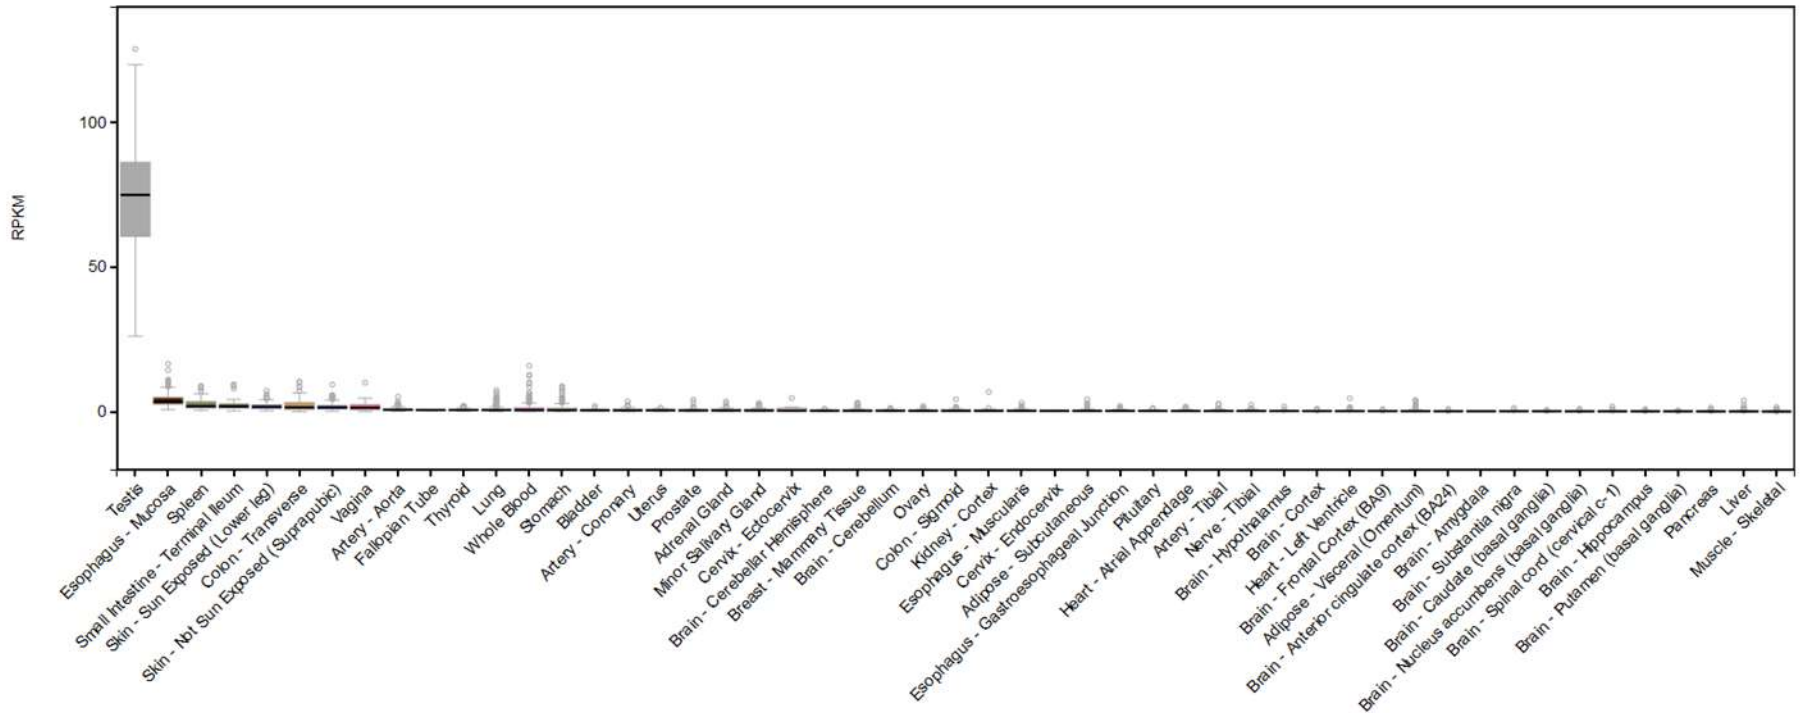

# MAGEA1

Median RPKM of highest tissue: 4.918

Plot:  Gene  Isoform

Differentiation:  None  Gender

Scale:  Log  Linear

Sort: ABC  ▲  ▼

Outliers:  On  Off

Display:  Boxes  Medians

Filter:  Tissue

MAGEA1 Gene Expression

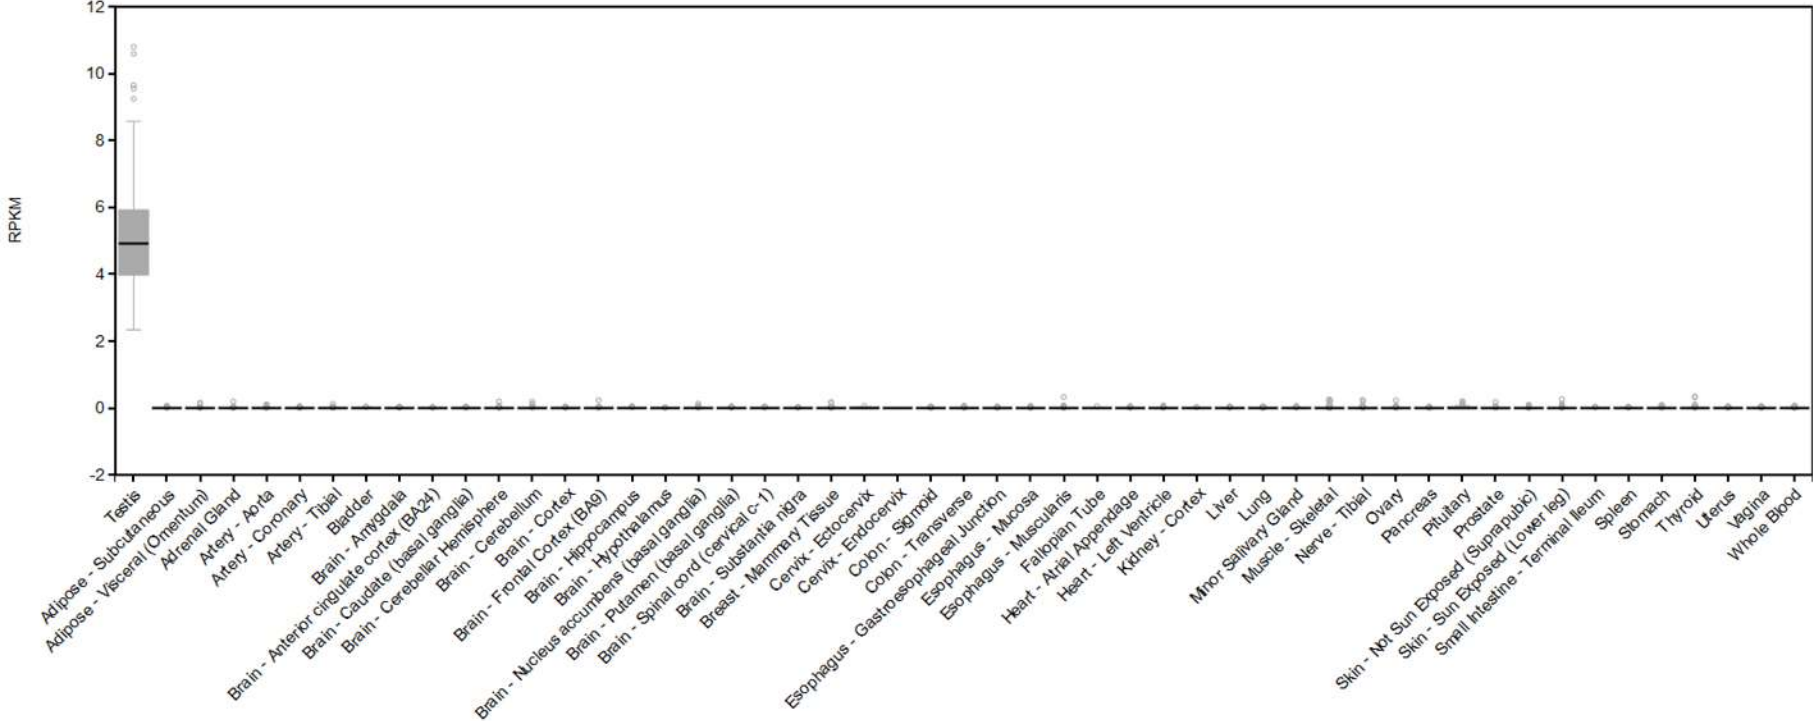

# PAGE2B

Median RPKM of highest tissue: 39.517

Plot:  Gene  Isoform

Differentiation:  None  Gender

Scale:  Log  Linear

Sort: ABC ▲ ▼

Outliers:  On  Off

Display:  Boxes  Medians

Filter:

PAGE2B Gene Expression

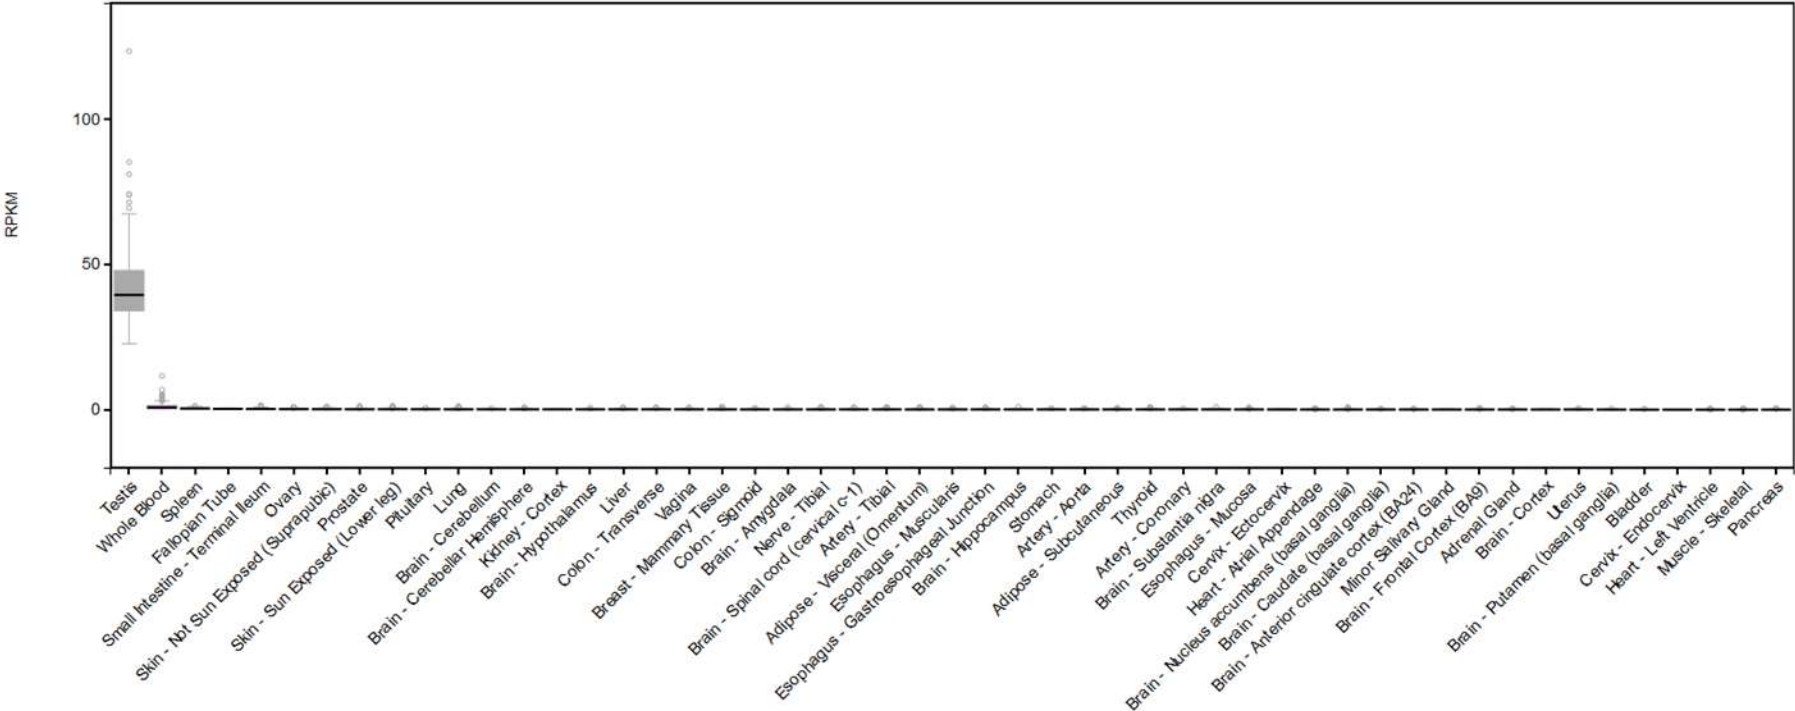

# CTAGE5

Median RPKM of highest tissue: 1.831

Plot:      Differentiation:      Scale:      Sort:       Outliers:      Display:      Filter:

CTAGE5 Gene Expression

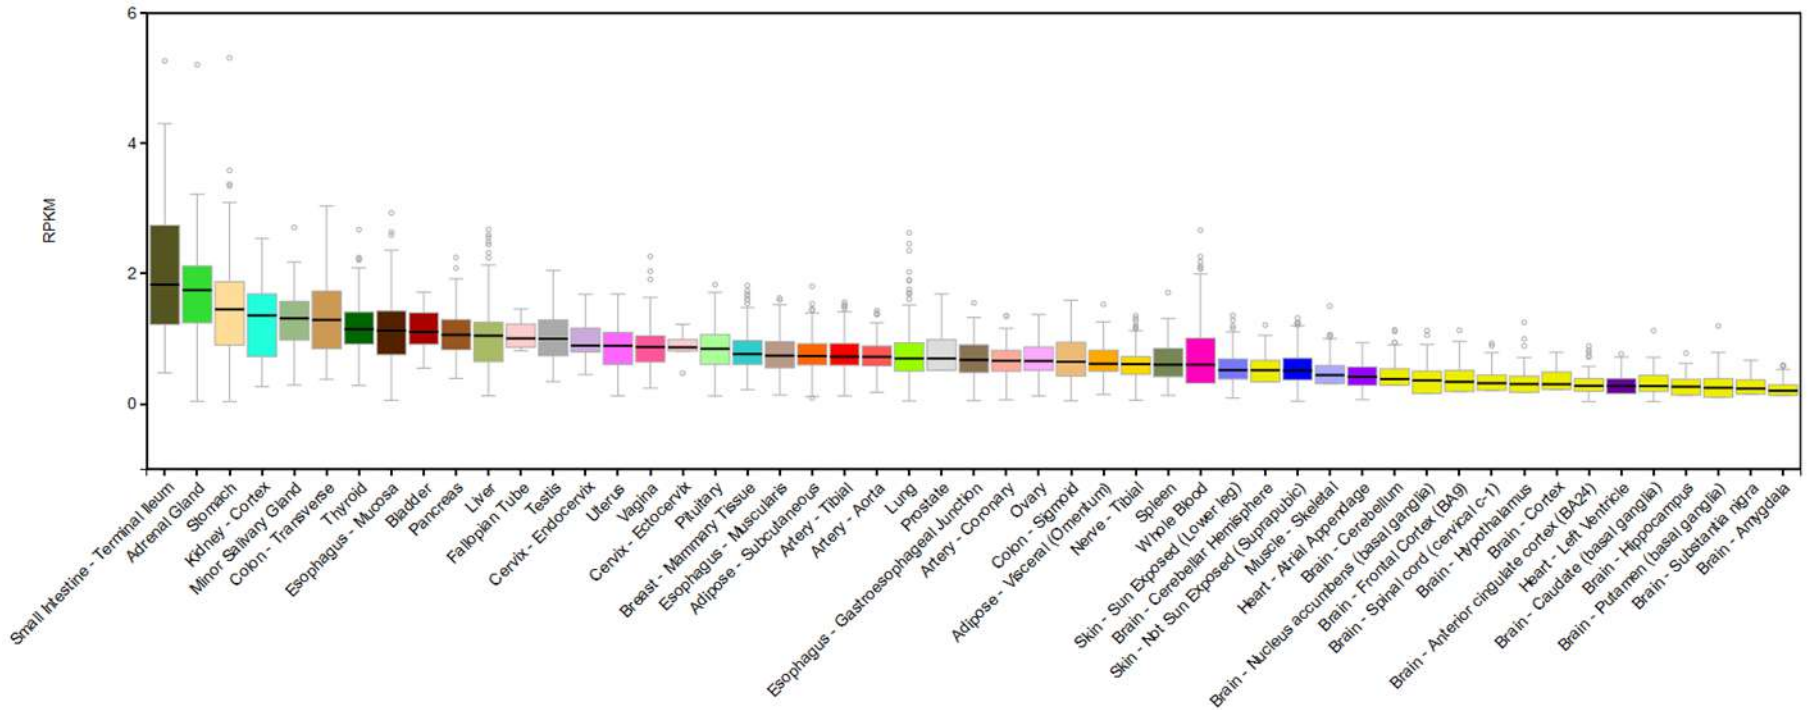



# MAGEA8

Median RPKM of highest tissue: 1.342

Plot:  Gene  Isoform  
Differentiation:  None  Gender  
Scale:  Log  Linear  
Sort: ABC ▲ ▼  
Outliers:  On  Off  
Display:  Boxes  Medians  
Filter:

MAGEA8 Gene Expression



# MAGEA4

Median RPKM of highest tissue: 12.796

Plot:  Gene  Isoform

Differentiation:  None  Gender

Scale:  Log  Linear

Sort: ABC ▲ ▼

Outliers:  On  Off

Display:  Boxes  Medians

Filter:  Tissue

MAGEA4 Gene Expression



# SYCP1

Median RPKM of highest tissue: 21.327

Plot:      Differentiation:      Scale:      Sort:       Outliers:      Display:      Filter:

SYCP1 Gene Expression





# ACRBP

Median RPKM of highest tissue: 277.644

Spleen: 8.343

Plot:  Gene  Isoform

Differentiation:  None  Gender

Scale:  Log  Linear

Sort: ABC ▲ ▼

Outliers:  On  Off

Display:  Boxes  Medians

Filter:

ACRBP Gene Expression

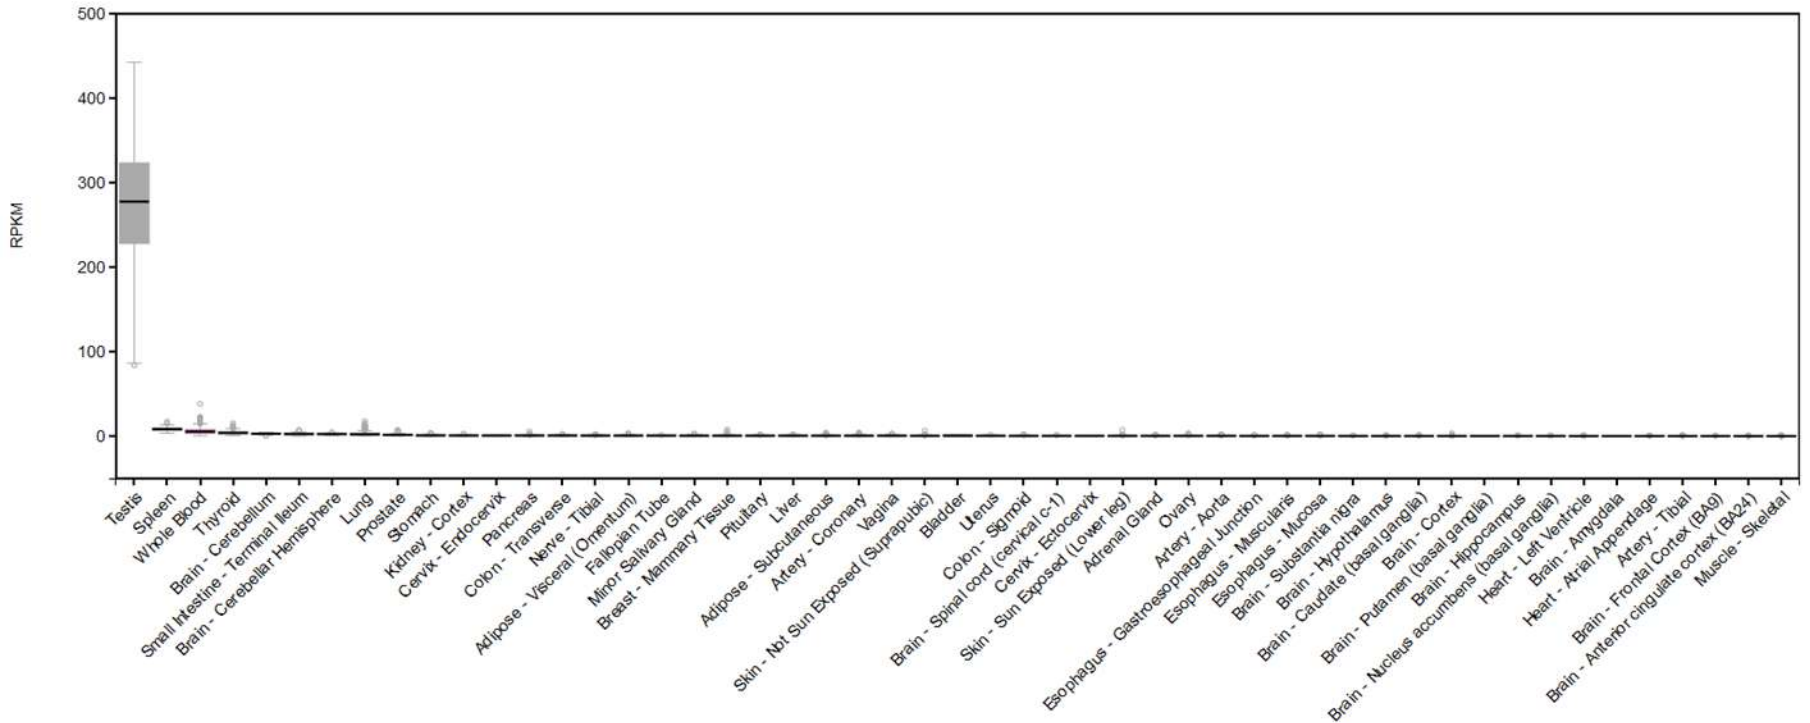

# CRISP2

Median RPKM of highest tissue: 554.806

Minor Salivary Gland: 9.827

CRISP2 Gene Expression

Plot:  Gene  Isoform

Differentiation:  None  Gender

Scale:  Log  Linear

Sort: ABC  ▲  ▼

Outliers:  On  Off

Display:  Boxes  Medians

Filter:  Tissue

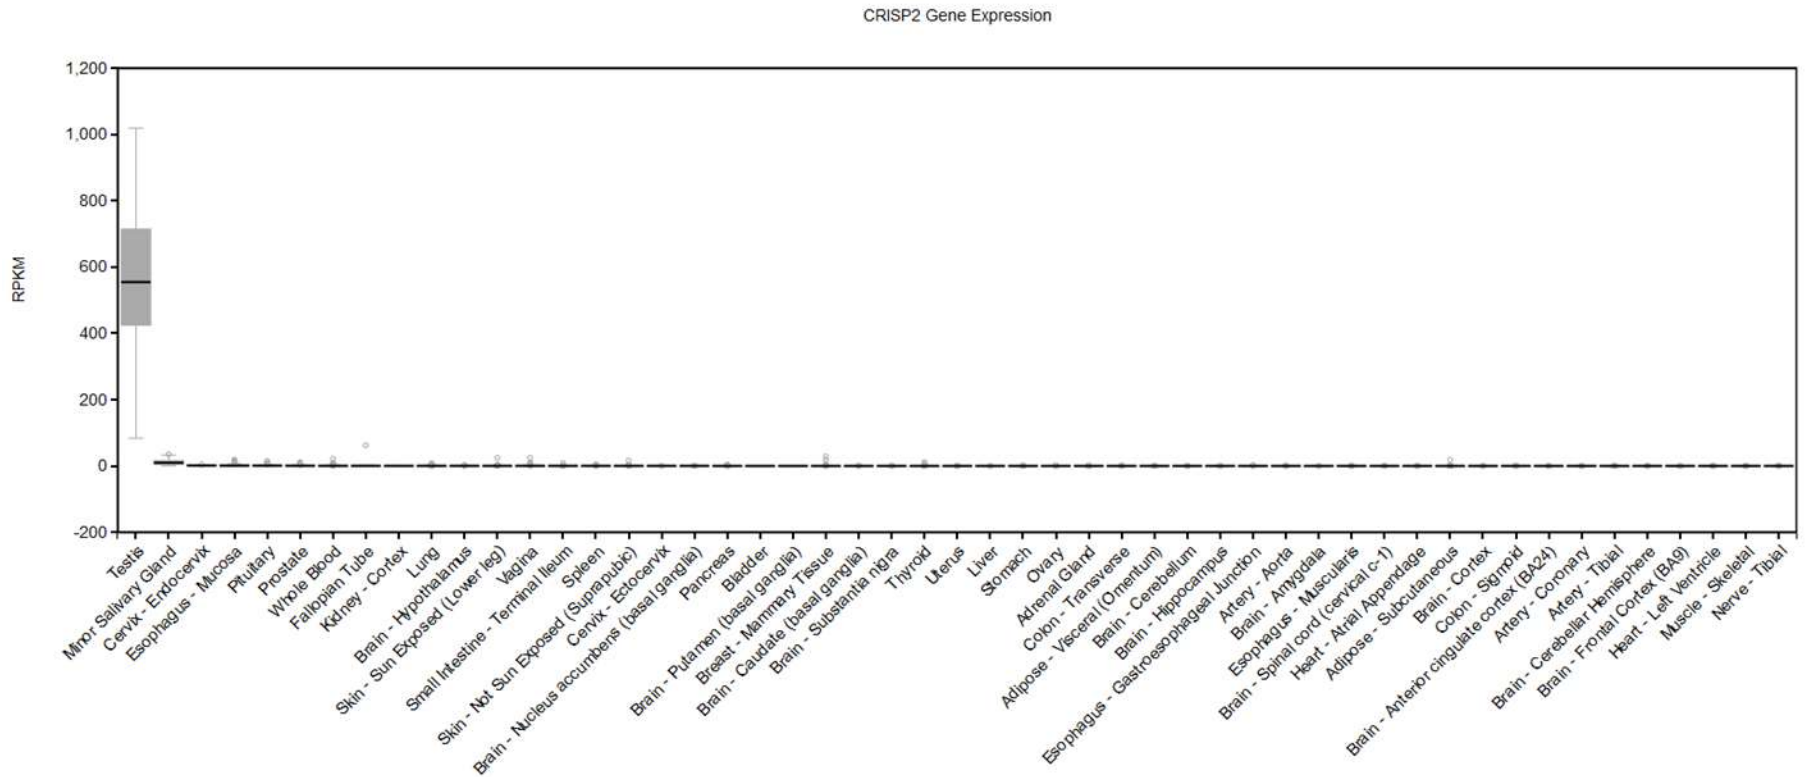



# TDRD6

Median RPKM of highest tissue: 13.167

Plot:  Gene  Isoform

Differentiation:  None  Gender

Scale:  Log  Linear

Sort: ABC  ▲  ▼

Outliers:  On  Off

Display:  Boxes  Medians

Filter:

TDRD6 Gene Expression

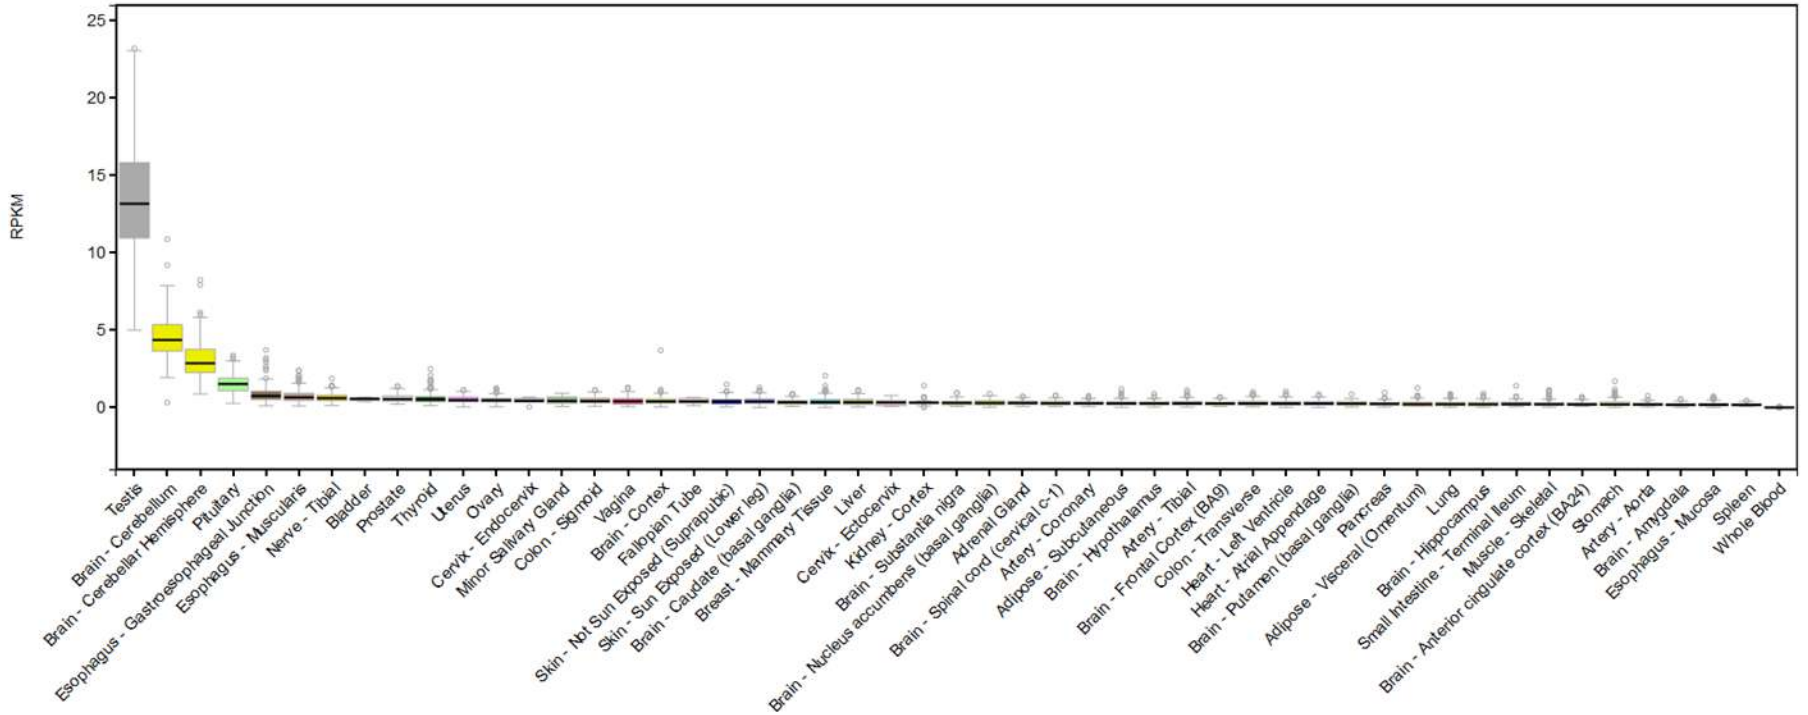

# SPEF2

Median RPKM of highest tissue: 4.770

Plot:  Gene  Isoform

Differentiation:  None  Gender

Scale:  Log  Linear

Sort: ABC  ▲  ▼

Outliers:  On  Off

Display:  Boxes  Medians

Filter:

SPEF2 Gene Expression

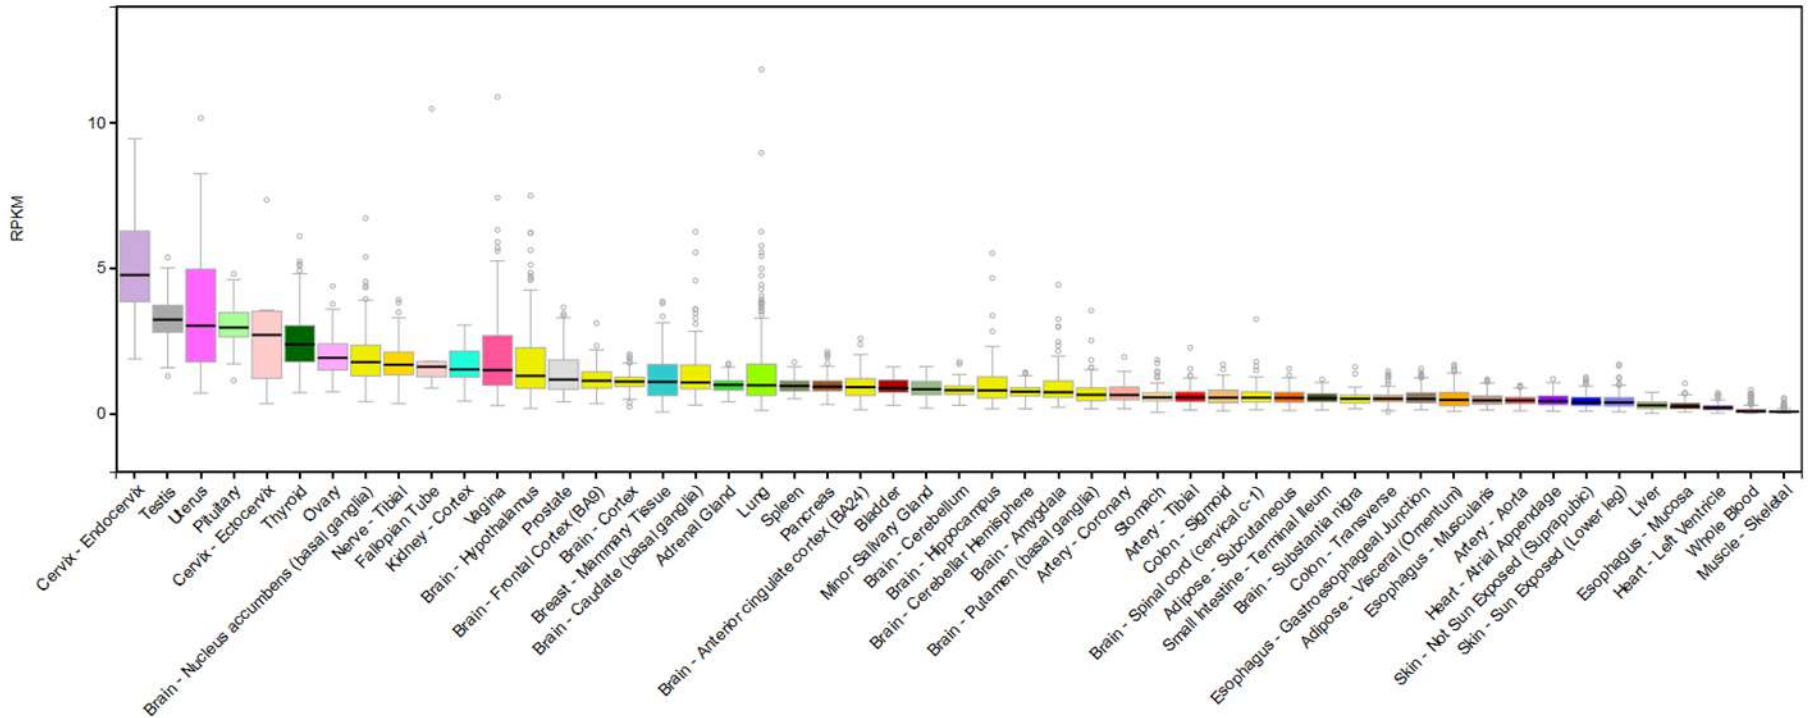

# SPAG17

Median RPKM of highest tissue: 11.971

Plot:      Differentiation:      Scale:      Sort:       Outliers:      Display:      Filter:

SPAG17 Gene Expression

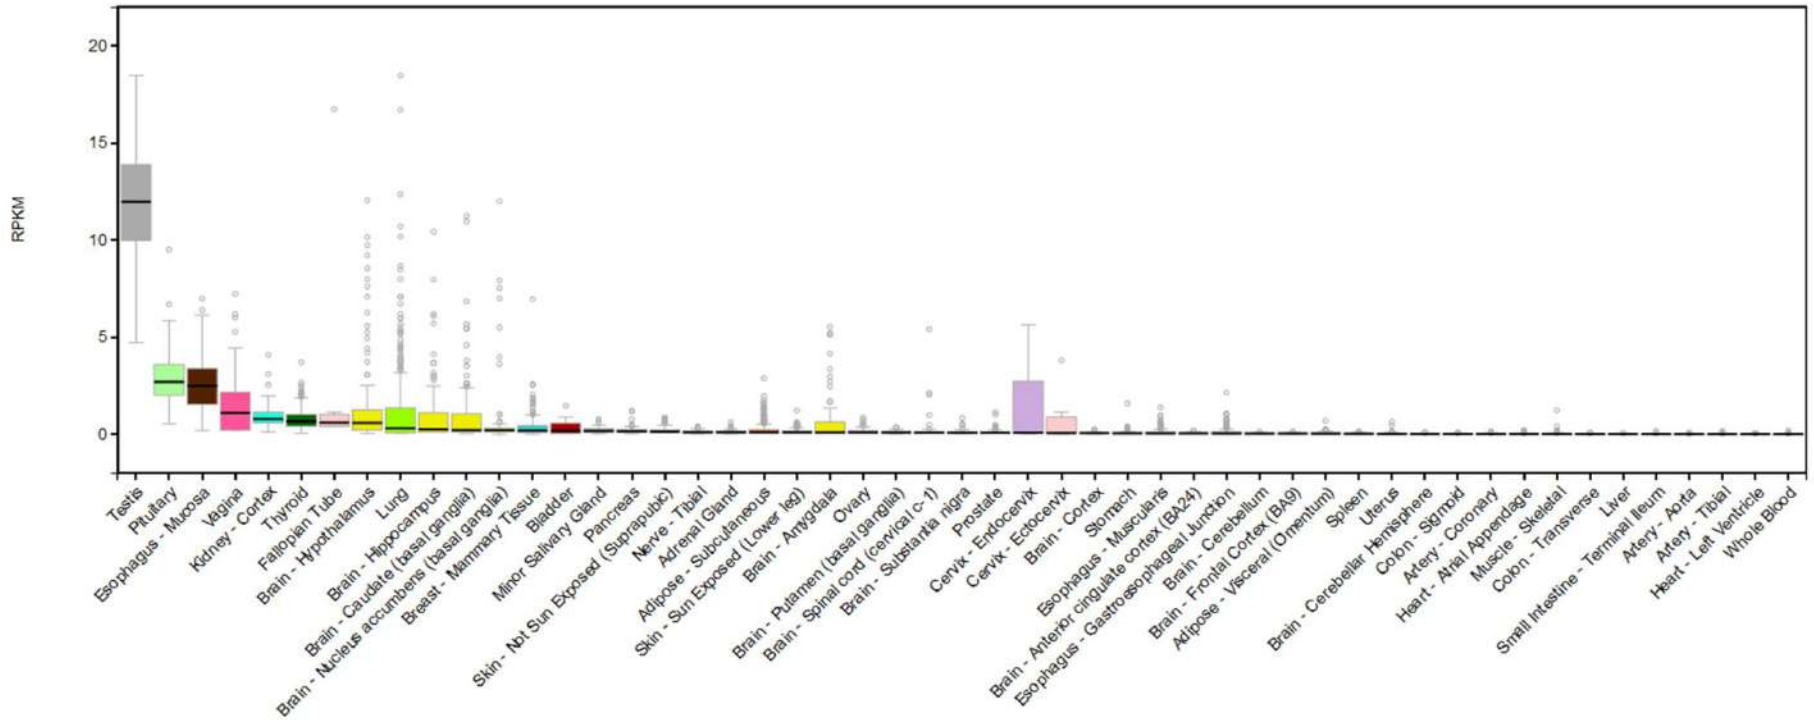

# DPPA2

Median RPKM of highest tissue: 2.787

Plot:  Gene  Isoform

Differentiation:  None  Gender

Scale:  Log  Linear

Sort: ABC ▲ ▼

Outliers:  On  Off

Display:  Boxes  Medians

Filter:

DPPA2 Gene Expression



# CTAGE5

Median RPKM of highest tissue: 1.831

Plot:      Differentiation:      Scale:      Sort:       Outliers:      Display:      Filter:

CTAGE5 Gene Expression



Supplement: pnas.1707658114.sfig06.pdf [file pnas.1707658114.sfig06.pdf]
