# Supplementary material for: The immunopeptidomic landscape of ovarian carcinomas
Source: PubMed Central journal article supplement — Proc Natl Acad Sci U S A. 2017 Nov 1;114(46):E9942–51. doi: 10.1073/pnas.1707658114 (PMC5699044; doi:10.1073/pnas.1707658114), 2017-11-01
Supplement: pnas.1707658114.sfig02.pdf [file pnas.1707658114.sfig02.pdf]

**A**

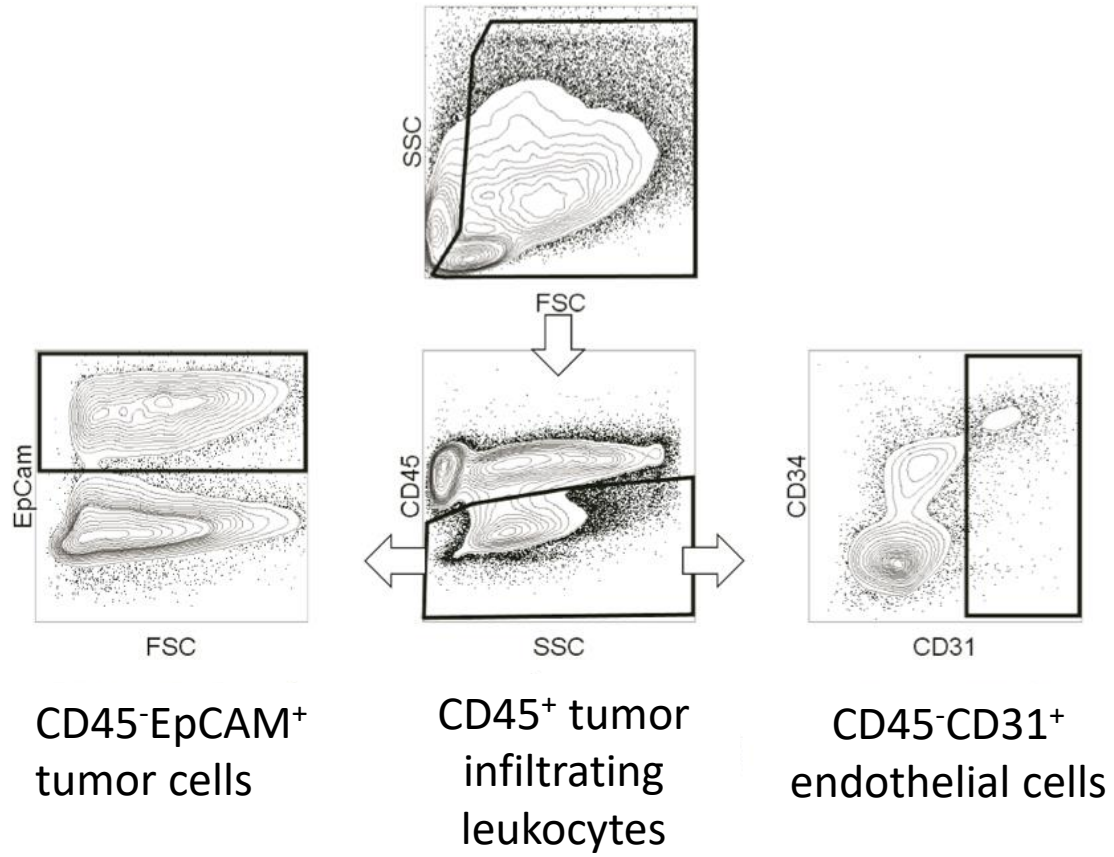

**B**

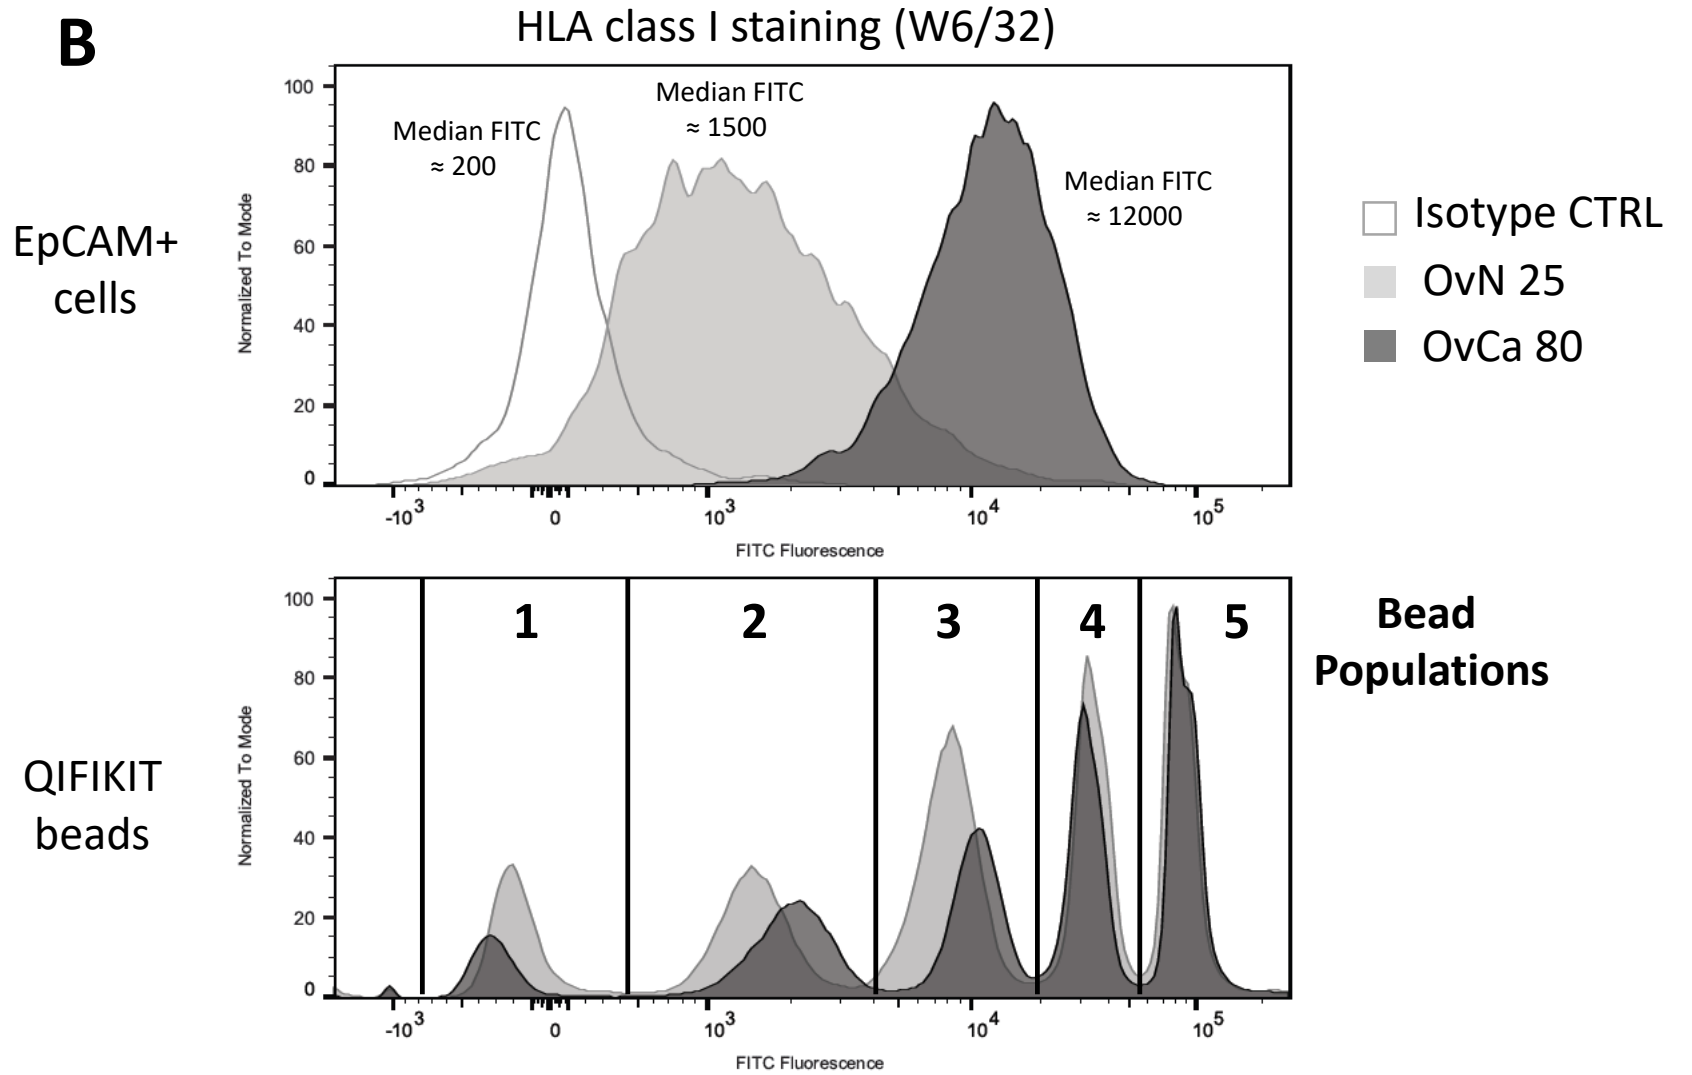

|         |                    | Bead Pop 1 | Bead Pop 2 | Bead Pop 3 | Bead Pop 4 | Bead Pop 5 |
|---------|--------------------|------------|------------|------------|------------|------------|
| OvN 25  | MFI                | 541        | 2,230      | 8,915      | 34,777     | 85,300     |
|         | molecules per bead | 2,900      | 12,000     | 57,000     | 256,000    | 723,000    |
| OvCa 80 | MFI                | 445        | 2,817      | 11,485     | 32,720     | 89,278     |
|         | molecules per bead | 2,200      | 15,000     | 69,000     | 227,000    | 737,000    |
