# Supplementary figures and images for: The immunopeptidomic landscape of ovarian carcinomas
Source: PubMed Central journal article supplement — Proc Natl Acad Sci U S A. 2017 Nov 1;114(46):E9942–51. doi: 10.1073/pnas.1707658114 (PMC5699044; doi:10.1073/pnas.1707658114), 2017-11-01

# MUC16 (CA-125)

**A**

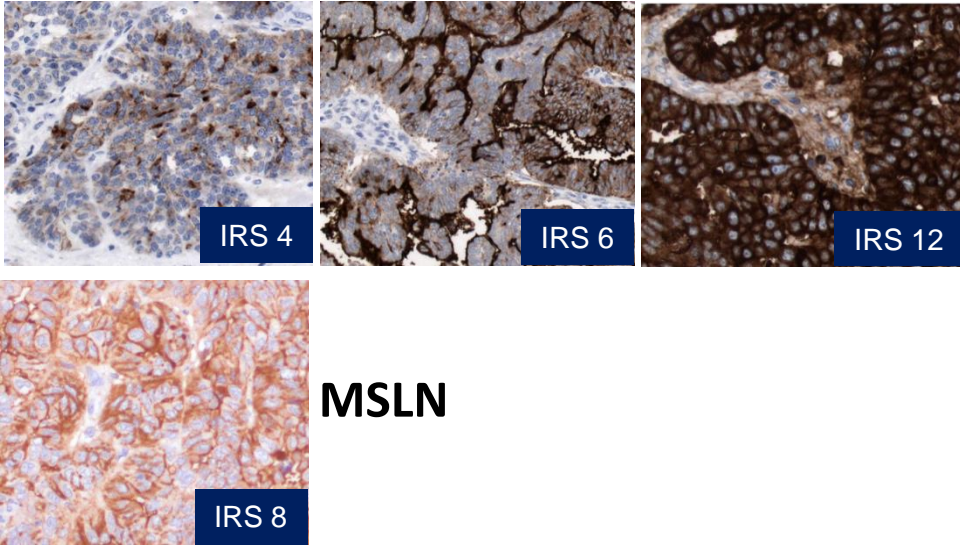

**B**

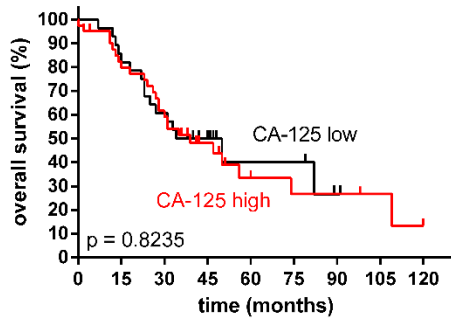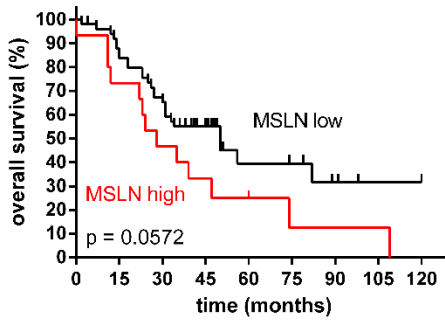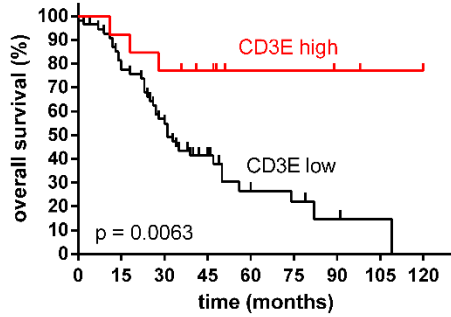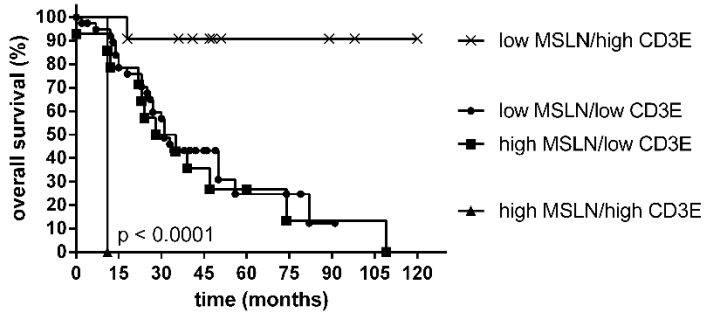

**C**

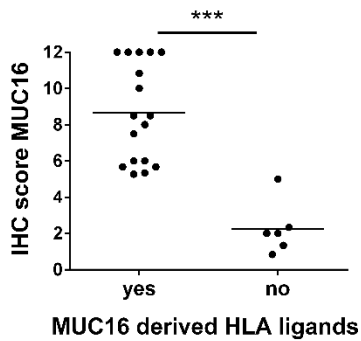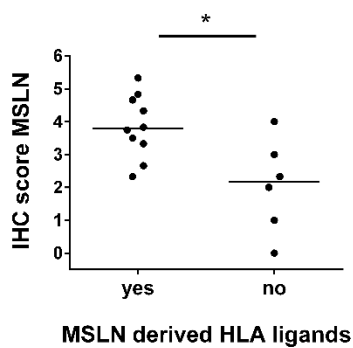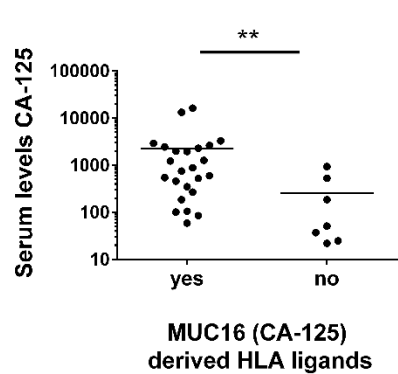

Supplement: pnas.1707658114.sfig05.pdf [file pnas.1707658114.sfig05.pdf]
